# Supplementary material for: The Effects on Parapatric Divergence of Linkage between Preference and Trait Loci versus Pleiotropy
Source: MDPI journal article supplement (doi:10.3390/genes9040217), 2018-04-17

# Supplementary Material File S4:

## The preference/trait model with natural selection only on males, recombination between the preference and trait loci, and migration between two demes

by

Maria Servedio and Reinhard Bürger

### ■ I. Model and derivation of recursion relations

P2 is a preference allele for T2, with strength  $\alpha_2$ ,

P1 is a preference allele for T1, with strength  $\alpha_1$ .

Migration into deme 1 occurs at rate  $m_1$ , i.e., a fraction  $m_1$  of individuals in deme 1 is replaced by individuals from deme 2; migration into deme 2 occurs at rate  $m_2$ .

T1 (T2) is favored by viability selection in males in deme 1 (2) with selection coefficient  $s_1$  ( $s_2$ ).

The recombination rate between the P and T locus is  $r \geq 0$ .

Four genotypes, with frequencies (on the island) denoted by

$x_1[1]$  = frequency of P1T1 in deme 1

$x_1[2]$  = frequency of P1T2 in deme 1

$x_1[3]$  = frequency of P2T1 in deme 1

$x_1[4]$  = frequency of P2T2 in deme 1

$x_2[1]$  = frequency of P1T1 in deme 2

$x_2[2]$  = frequency of P1T2 in deme 2

$x_2[3]$  = frequency of P2T1 in deme 2

$x_2[4]$  = frequency of P2T2 in deme 2

We use mainly allele frequencies and linkage disequilibria to describe the dynamics:

$p_{12} = x_1[3] + x_1[4]$  = frequency of preference allele P2 in deme 1 (Note: the ordering of subscripts differs from that in the manuscript)

$t_{12} = x_1[2] + x_1[4]$  = frequency of trait allele T2 in deme 1 (Note: the ordering of subscripts differs from that in the manuscript)

$dd_1 = x_1[1]x_1[4] - x_1[2]x_1[3]$  = linkage disequilibrium between P and T in deme 1

$p_{22}$ ,  $t_{22}$ ,  $dd_2$  are the analogous quantities in deme 2

The phenotype-matching model is obtained as a special case if  $r = 0$  and  $p_{12} = t_{12}$  and  $p_{22} = t_{22}$ . As a consequence, linkage disequilibrium is maximal, i.e.,  $dd_1 = t_{12}(1-t_{12})$  and  $dd_2 = t_{22}(1-t_{22})$ .

## I.I Modeling the stages of the life cycle

### I.I.I Migration

Gamete frequencies after migration

$$\begin{aligned} x_{1m}[1] &= (1 - m_1) x_1[1] + m_1 x_2[1]; \\ x_{1m}[2] &= (1 - m_1) x_1[2] + m_1 x_2[2]; \\ x_{1m}[3] &= (1 - m_1) x_1[3] + m_1 x_2[3]; \\ x_{1m}[4] &= (1 - m_1) x_1[4] + m_1 x_2[4]; \end{aligned}$$

$$\begin{aligned} x_{2m}[1] &= (1 - m_2) x_2[1] + m_2 x_1[1]; \\ x_{2m}[2] &= (1 - m_2) x_2[2] + m_2 x_1[2]; \\ x_{2m}[3] &= (1 - m_2) x_2[3] + m_2 x_1[3]; \\ x_{2m}[4] &= (1 - m_2) x_2[4] + m_2 x_1[4]; \end{aligned}$$

### I.I.2 Viability selection in males

Gamete frequencies after viability selection

males in pop 1:

$$w_{1barm} = 1 + s_1 (x_{1m}[1] + x_{1m}[3]);$$

$$\begin{aligned} x_{nsm1}[1] &= x_{1m}[1] (1 + s_1) / w_{1barm}; \\ x_{nsm1}[2] &= x_{1m}[2] / w_{1barm}; \\ x_{nsm1}[3] &= x_{1m}[3] (1 + s_1) / w_{1barm}; \\ x_{nsm1}[4] &= x_{1m}[4] / w_{1barm}; \end{aligned}$$

`Clear[x1m, w1barm, x2m, w2barm]`

`Simplify[Sum[xnsm1[i], {i, 4}]]`

$$\frac{1}{w_{1barm}} (x_{1m}[1] + s x_{1m}[1] + x_{1m}[2] + x_{1m}[3] + s x_{1m}[3] + x_{1m}[4])$$

`Simplify[Sum[xnsm1[i], {i, 4}] /. {`

$$x_1[1] \rightarrow 1 - x_1[2] - x_1[3] - x_1[4], x_2[1] \rightarrow 1 - x_2[2] - x_2[3] - x_2[4] \} ]$$

`1`

no viability selection in females:

$$\text{Do}[x_{nsf1}[i] = x_{1m}[i], \{i, 4\}];$$

males in pop 2:

```
w2barm = 1 + s2 (x2m[2] + x2m[4]);
```

```
xnsm2[1] = x2m[1] / w2barm;
xnsm2[2] = (1 + s2) x2m[2] / w2barm;
xnsm2[3] = x2m[3] / w2barm;
xnsm2[4] = (1 + s2) x2m[4] / w2barm;
```

no viability selection in females:

```
Do[xnsf2[i] = x2m[i], {i, 4}];
```

### I.1.3 Sexual selection

P1 prefers T1 (by a factor of  $1+\alpha_1$ ), and P2 prefers T2 (by a factor of  $1+\alpha_2$ )

pop 1

```
Mate1 = Table[xnsf1[i] xnsm1[j], {i, 4}, {j, 4}];
Coef = Table[1, {i, 4}, {j, 4}];
Do[Coef[[i, 1]] = (1 +  $\alpha_1$ ), {i, 1, 2}];
Do[Coef[[i, 3]] = (1 +  $\alpha_1$ ), {i, 1, 2}];
Do[Coef[[i, 2]] = (1 +  $\alpha_2$ ), {i, 3, 4}];
Do[Coef[[i, 4]] = (1 +  $\alpha_2$ ), {i, 3, 4}];
G1 = Mate1 Coef;
```

**Simplify[Coef] // TableForm**

|                |                |                |                |
|----------------|----------------|----------------|----------------|
| $1 + \alpha_1$ | 1              | $1 + \alpha_1$ | 1              |
| $1 + \alpha_1$ | 1              | $1 + \alpha_1$ | 1              |
| 1              | $1 + \alpha_2$ | 1              | $1 + \alpha_2$ |
| 1              | $1 + \alpha_2$ | 1              | $1 + \alpha_2$ |

```
Do[z1[i] = Sum[xnsm1[j] Coef[[i, j]], {j, 4}], {i, 4}]
```

```
F1 = Table[0, {i, 4}, {j, 4}];
Do[F1[[i, j]] = G1[[i, j]] / z1[i], {i, 4}, {j, 4}];
```

**TableForm[Simplify[F1]]**

```

- (-1+s1 ((-1+m1) x1[1]+(-1+m1) x1[3]-m1 (x2[1]+x2[3]))) (-(-1+m1) (1+s1) (1+ $\alpha_1$ ) x1[1]+x1[2]-m1 x1[2]+x1[3]-m1 x1[3]+s1 x1[3]
- (-1+s1 ((-1+m1) x1[1]+(-1+m1) x1[3]-m1 (x2[1]+x2[3]))) (-(-1+m1) (1+s1) (1+ $\alpha_1$ ) x1[1]+x1[2]-m1 x1[2]+x1[3]-m1 x1[3]+s1 x1[3]
- (-1+s1 ((-1+m1) x1[1]+(-1+m1) x1[3]-m1 (x2[1]+x2[3]))) (-(-1+m1) (1+s1) x1[1]-(-1+m1) (1+ $\alpha_2$ ) x1[2]+x1[3]-m1 x1[3]+s1 x1[3]
- (-1+s1 ((-1+m1) x1[1]+(-1+m1) x1[3]-m1 (x2[1]+x2[3]))) (-(-1+m1) (1+s1) x1[1]-(-1+m1) (1+ $\alpha_2$ ) x1[2]+x1[3]-m1 x1[3]+s1 x1[3]
```

pop 2

```
Mate2 = Table[xnsf2[i] xnsm2[j], {i, 4}, {j, 4}];
G2 = Mate2 Coef;
```

```
Do[z2[i] = Sum[xnsm2[j] Coef[[i, j]], {j, 4}], {i, 4}]
```

```
F2 = Table[0, {i, 4}, {j, 4}];
Do[F2[[i, j]] = G2[[i, j]] / z2[i], {i, 4}, {j, 4}];
```

```
TableForm[F2]
```

|                                                                                                       |                                                                                                       |                                              |
|-------------------------------------------------------------------------------------------------------|-------------------------------------------------------------------------------------------------------|----------------------------------------------|
| $(1+\alpha_1) \text{ xnsf2}[1] \text{ xnsf2}[1]$                                                      | $\text{ xnsf2}[1] \text{ xnsf2}[1]$                                                                   | $(1+\alpha_1)$                               |
| $(1+\alpha_1) \text{ xnsf2}[1] + \text{ xnsf2}[2] + (1+\alpha_1) \text{ xnsf2}[3] + \text{ xnsf2}[4]$ | $(1+\alpha_1) \text{ xnsf2}[1] + \text{ xnsf2}[2] + (1+\alpha_1) \text{ xnsf2}[3] + \text{ xnsf2}[4]$ | $(1+\alpha_1) \text{ xnsf2}[1] + \text{ xn}$ |
| $(1+\alpha_1) \text{ xnsf2}[2] \text{ xnsf2}[1]$                                                      | $\text{ xnsf2}[2] \text{ xnsf2}[1]$                                                                   | $(1+\alpha_1)$                               |
| $(1+\alpha_1) \text{ xnsf2}[2] + \text{ xnsf2}[2] + (1+\alpha_1) \text{ xnsf2}[3] + \text{ xnsf2}[4]$ | $(1+\alpha_1) \text{ xnsf2}[2] + \text{ xnsf2}[2] + (1+\alpha_1) \text{ xnsf2}[3] + \text{ xnsf2}[4]$ | $(1+\alpha_1) \text{ xnsf2}[2] + \text{ xn}$ |
| $\text{ xnsf2}[3] \text{ xnsf2}[1]$                                                                   | $(1+\alpha_2) \text{ xnsf2}[3] \text{ xnsf2}[2]$                                                      | $\text{ xn}$                                 |
| $\text{ xnsf2}[1] + (1+\alpha_2) \text{ xnsf2}[2] + \text{ xnsf2}[3] + (1+\alpha_2) \text{ xnsf2}[4]$ | $\text{ xnsf2}[1] + (1+\alpha_2) \text{ xnsf2}[2] + \text{ xnsf2}[3] + (1+\alpha_2) \text{ xnsf2}[4]$ | $\text{ xnsf2}[1] + (1+\alpha_2) \text{ xn}$ |
| $\text{ xnsf2}[4] \text{ xnsf2}[1]$                                                                   | $(1+\alpha_2) \text{ xnsf2}[4] \text{ xnsf2}[2]$                                                      | $\text{ xn}$                                 |
| $\text{ xnsf2}[1] + (1+\alpha_2) \text{ xnsf2}[2] + \text{ xnsf2}[3] + (1+\alpha_2) \text{ xnsf2}[4]$ | $\text{ xnsf2}[1] + (1+\alpha_2) \text{ xnsf2}[2] + \text{ xnsf2}[3] + (1+\alpha_2) \text{ xnsf2}[4]$ | $\text{ xnsf2}[1] + (1+\alpha_2) \text{ xn}$ |

## I.1.4 Recombination

pop 1

```
x1t1[1] = Simplify[F1[[1, 1]] + (1/2) F1[[1, 2]] + (1/2) F1[[1, 3]] +
(1/2) (1 - r) F1[[1, 4]] + (1/2) F1[[2, 1]] + (1/2) r F1[[2, 3]] +
(1/2) F1[[3, 1]] + (1/2) r F1[[3, 2]] + (1/2) (1 - r) F1[[4, 1]]];
```

```
x1t1[2] = Simplify[(1/2) F1[[1,2]] + (1/2) r F1[[1,4]] +
(1/2) F1[[2,1]] + F1[[2,2]] + (1/2) (1-r) F1[[2,3]] +
(1/2) F1[[2,4]] + (1/2) (1-r) F1[[3,2]] +
(1/2) r F1[[4,1]] + (1/2) F1[[4,2]]];
```

```
x1t1[3] = Simplify[(1/2) F1[[1,3]] + (1/2) r F1[[1,4]] +
(1/2) (1-r) F1[[2,3]] + (1/2) F1[[3,1]] +
(1/2) (1-r) F1[[3,2]] + F1[[3,3]] + (1/2) F1[[3,4]] +
(1/2) r F1[[4,1]] + (1/2) F1[[4,3]]];
```

```
x1t1[4] = Simplify[(1/2) (1-r) F1[[1,4]] + (1/2) r F1[[2,3]] +
(1/2) F1[[2,4]] + (1/2) r F1[[3,2]] + (1/2) F1[[3,4]] +
(1/2) (1-r) F1[[4,1]] + (1/2) F1[[4,2]] + (1/2) F1[[4,3]] + F1[[4,4]]];
```

pop 2

```
x2t1[1] = Simplify[F2[[1, 1]] + (1/2) F2[[1, 2]] + (1/2) F2[[1, 3]] +
(1/2) (1 - r) F2[[1, 4]] + (1/2) F2[[2, 1]] + (1/2) r F2[[2, 3]] +
(1/2) F2[[3, 1]] + (1/2) r F2[[3, 2]] + (1/2) (1 - r) F2[[4, 1]]];
```

```
x2t1[2] = Simplify[(1/2) F2[[1,2]] + (1/2) r F2[[1,4]] +
(1/2) F2[[2,1]] + F2[[2,2]] + (1/2) (1-r) F2[[2,3]] +
(1/2) F2[[2,4]] + (1/2) (1-r) F2[[3,2]] +
(1/2) r F2[[4,1]] + (1/2) F2[[4,2]]];
```

```
x2t1[3] = Simplify[(1/2) F2[[1,3]] + (1/2) r F2[[1,4]] +
(1/2) (1-r) F2[[2,3]] + (1/2) F2[[3,1]] +
(1/2) (1-r) F2[[3,2]] + F2[[3,3]] + (1/2) F2[[3,4]] +
(1/2) r F2[[4,1]] + (1/2) F2[[4,3]]];
```

```
x2t1[4] = Simplify[(1/2) (1-r) F2[[1,4]] + (1/2) r F2[[2,3]] +
(1/2) F2[[2,4]] + (1/2) r F2[[3,2]] + (1/2) F2[[3,4]] +
(1/2) (1-r) F2[[4,1]] + (1/2) F2[[4,2]] + (1/2) F2[[4,3]] + F2[[4,4]]];
```

## I.2 Recursions for allele frequencies and LD

The notation here is that the 1st subscript represents the population and the second represents the allele.

So all is done with respect to allele 2 in both populations.

## I.2.1 Derivation of the recursion relations

```

x1[1] = (1 - p12) (1 - t12) + dd1;
x1[2] = (1 - p12) t12 - dd1;
x1[3] = p12 (1 - t12) - dd1;
x1[4] = p12 t12 + dd1;
x2[1] = (1 - p22) (1 - t22) + dd2;
x2[2] = (1 - p22) t22 - dd2;
x2[3] = p22 (1 - t22) - dd2;
x2[4] = p22 t22 + dd2;

p1t1 = Simplify[x1t1[3] + x1t1[4]]
t1t1 = Simplify[x1t1[2] + x1t1[4]]
dd1t1 = x1t1[1] x1t1[4] - x1t1[2] x1t1[3]
p2t1 = Simplify[x2t1[3] + x2t1[4]]
t2t1 = Simplify[x2t1[2] + x2t1[4]]
dd2t1 = x2t1[1] x2t1[4] - x2t1[2] x2t1[3]
{p1t1, t1t1, dd1t1, p2t1, t2t1, dd2t1}

```

## I.2.2 The main recursion relation, itgenmale[s1, s2, α1, α2, m1, m2, r][{p12, t12, dd1, p22, t22, dd2}]

For given parameters {s1, s2, α1, α2, m1, m2, r}, itgenmale computes {p12 (t + 1), t12 (t + 1), dd1 (t + 1), p22 (t + 1), t22 (t + 1), dd2 (t + 1)} from {p12 (t), t12 (t), dd1 (t), p22 (t), t22 (t), dd2 (t)}.

Because computation of p1t1 etc (see above) is time consuming, we define itgenmale[s1, s2, α1, α2, m1, m2, r][{p12, t12, dd1, p22, t22, dd2}] explicitly by the right-hand side of {p1t1, t1t1, dd1t1, p2t1, t2t1, dd2t1}.

```

itgenmale[s1_, s2_, α1_, α2_, m1_, m2_, r_] [{p12_, t12_, dd1_, p22_, t22_, dd2_}] :=
{
  (dd1 (s1 + α1 + s1 α1) (-1 + s1 (-1 + t12) - t12 α2) +
    (-1 + m1)2 m1 p122 (1 + s1) (t12 - t22) (α1 + α2 + α1 α2) + m13 p22 (t12 - t22)
    (s12 (t12 - t22) (1 + α1) + (-t12 + t22) α1 α2 + p22 (α1 + α2 + α1 α2) +
    s1 (- (t12 - t22) (α1 (-1 + α2) + α2) + p22 (α1 + α2 + α1 α2))) +
    m1 (- (s1 + α1 + s1 α1) (dd2 (1 + s1 - s1 t12 + t12 α2) + dd1 (-1 + s1 (-1 + 2 t12 - t22) -
    2 t12 α2 + t22 α2)) + p22 (2 + s12 (-1 + t12) (-2 + t12 + t22) (1 + α1) +
    dd1 α2 + 2 t12 α2 + α1 (dd1 (1 + α2) - (-2 + t12 + t22) (1 + t12 α2)) +
    s1 (4 - t22 + 4 α1 + dd1 α1 - 2 t22 α1 + dd1 α2 + dd1 α1 α2 - t122 (α1 (-1 + α2) +
    α2) - t12 (3 + α1 (4 + t22 (-1 + α2) - 2 α2) + (-2 + t22) α2))) +
    m12 ((dd1 - dd2) (t12 - t22) (s1 + α1 + s1 α1) (s1 - α2) - p222 (1 + s1)
    (t12 - t22) (α1 + α2 + α1 α2) +
    p22 (-dd1 α1 + dd2 α1 + t12 α1 - t22 α1 - s12 (2 t122 - (-3 + t22) t22 - t12 (3 + t22))
    (1 + α1) - dd1 α2 + dd2 α2 - 2 t12 α2 + 2 t22 α2 - dd1 α1 α2 + dd2 α1 α2 -
    2 t12 α1 α2 + 2 t122 α1 α2 + 2 t22 α1 α2 - t12 t22 α1 α2 - t222 α1 α2 +
    s1 (2 t122 (α1 (-1 + α2) + α2) - t222 (α1 (-1 + α2) + α2) + t22

```

$$\begin{aligned}
& (-3 + 2\alpha_1(-2 + \alpha_2) + 2\alpha_2) - t_{12}(-3 + \alpha_1(2(-2 + \alpha_2) + t_{22}(-1 + \alpha_2)) + \\
& (2 + t_{22})\alpha_2) - (dd_1 - dd_2)(\alpha_1 + \alpha_2 + \alpha_1\alpha_2))) - \\
& (-1 + m_1)p_{12}(2 + 2\alpha_1 + dd_1\alpha_1 - dd_1m_1\alpha_1 + dd_2m_1\alpha_1 - 2t_{12}\alpha_1 + m_1t_{12}\alpha_1 - \\
& m_1p_{22}t_{12}\alpha_1 + 2m_1^2p_{22}t_{12}\alpha_1 - m_1t_{22}\alpha_1 + m_1p_{22}t_{22}\alpha_1 - \\
& 2m_1^2p_{22}t_{22}\alpha_1 + s_1^2(2 + (2 - 3m_1 + m_1^2)t_{12}^2 - 3m_1t_{22} + m_1^2t_{22}^2 + \\
& t_{12}(-4 - 2m_1^2t_{22} + 3m_1(1 + t_{22}))) (1 + \alpha_1) + dd_1\alpha_2 - dd_1m_1\alpha_2 + \\
& dd_2m_1\alpha_2 + 2t_{12}\alpha_2 - 2m_1t_{12}\alpha_2 - m_1p_{22}t_{12}\alpha_2 + 2m_1^2p_{22}t_{12}\alpha_2 + \\
& 2m_1t_{22}\alpha_2 + m_1p_{22}t_{22}\alpha_2 - 2m_1^2p_{22}t_{22}\alpha_2 + dd_1\alpha_1\alpha_2 - dd_1m_1\alpha_1\alpha_2 + \\
& dd_2m_1\alpha_1\alpha_2 + 2t_{12}\alpha_1\alpha_2 - 2m_1t_{12}\alpha_1\alpha_2 - m_1p_{22}t_{12}\alpha_1\alpha_2 + 2m_1^2p_{22}t_{12}\alpha_1\alpha_2 - \\
& 2t_{12}^2\alpha_1\alpha_2 + 3m_1t_{12}^2\alpha_1\alpha_2 - m_1^2t_{12}^2\alpha_1\alpha_2 + 2m_1t_{22}\alpha_1\alpha_2 + m_1p_{22}t_{22}\alpha_1\alpha_2 - \\
& 2m_1^2p_{22}t_{22}\alpha_1\alpha_2 - 3m_1t_{12}t_{22}\alpha_1\alpha_2 + 2m_1^2t_{12}t_{22}\alpha_1\alpha_2 - m_1^2t_{22}^2\alpha_1\alpha_2 + \\
& s_1(4 + 4\alpha_1 + dd_1\alpha_1 + dd_1\alpha_2 + dd_1\alpha_1\alpha_2 - (2 - 3m_1 + m_1^2)t_{12}^2(\alpha_1(-1 + \alpha_2) + \alpha_2) - \\
& m_1^2t_{22}(t_{22}(\alpha_1(-1 + \alpha_2) + \alpha_2) + 2p_{22}(\alpha_1 + \alpha_2 + \alpha_1\alpha_2)) + m_1(-(dd_1 - dd_2) \\
& (\alpha_1 + \alpha_2 + \alpha_1\alpha_2) + t_{22}(-3 + (2 + p_{22})\alpha_2 + \alpha_1(-4 + p_{22} + 2\alpha_2 + p_{22}\alpha_2))) + \\
& t_{12}(2(-2 + \alpha_1(-3 + \alpha_2) + \alpha_2) - m_1(-3 + (2 + p_{22} + 3t_{22})\alpha_2 + \\
& \alpha_1(-4 + p_{22} - 3t_{22} + 2\alpha_2 + p_{22}\alpha_2 + 3t_{22}\alpha_2)) + 2 \\
& m_1^2(t_{22}(\alpha_1(-1 + \alpha_2) + \alpha_2) + p_{22}(\alpha_1 + \alpha_2 + \alpha_1\alpha_2)))))) / \\
& (2(1 + (1 + (-1 + m_1)t_{12} - m_1t_{22})\alpha_1 + s_1(1 + (-1 + m_1)t_{12} - m_1t_{22})(1 + \alpha_1)) \\
& (1 + s_1(1 + (-1 + m_1)t_{12} - m_1t_{22}) + m_1t_{22}\alpha_2 + t_{12}(\alpha_2 - m_1\alpha_2)))) , \\
& - \left( \left( (-1 + m_1)t_{12} - m_1t_{22} \right) \left( 2 + s_1^2(1 + (-1 + m_1)t_{12} - m_1t_{22})^2(1 + \alpha_1) + \right. \right. \\
& p_{12}\alpha_2 - m_1p_{12}\alpha_2 + m_1p_{22}\alpha_2 + 2t_{12}\alpha_2 - 2m_1t_{12}\alpha_2 - p_{12}t_{12}\alpha_2 + \\
& 2m_1p_{12}t_{12}\alpha_2 - m_1^2p_{12}t_{12}\alpha_2 - m_1p_{22}t_{12}\alpha_2 + m_1^2p_{22}t_{12}\alpha_2 + 2m_1t_{22}\alpha_2 - \\
& m_1p_{12}t_{22}\alpha_2 + m_1^2p_{12}t_{22}\alpha_2 - m_1^2p_{22}t_{22}\alpha_2 - (1 + (-1 + m_1)t_{12} - m_1t_{22})\alpha_1 \\
& (-1 - t_{12}\alpha_2 + (-1 + m_1)p_{12}(1 + \alpha_2) - m_1(p_{22} + p_{22}\alpha_2 - t_{12}\alpha_2 + t_{22}\alpha_2)) - \\
& s_1(1 + (-1 + m_1)t_{12} - m_1t_{22})(-3 - p_{12}\alpha_2 + m_1p_{12}\alpha_2 - m_1p_{22}\alpha_2 - t_{12}\alpha_2 + \\
& m_1t_{12}\alpha_2 - m_1t_{22}\alpha_2 + \alpha_1(-2 + t_{12} - t_{12}\alpha_2 + (-1 + m_1)p_{12}(1 + \alpha_2) - \\
& m_1(p_{22} + t_{12} - t_{22} + p_{22}\alpha_2 - t_{12}\alpha_2 + t_{22}\alpha_2))) \left. \right) / \\
& (2(1 + (1 + (-1 + m_1)t_{12} - m_1t_{22})\alpha_1 + s_1(1 + (-1 + m_1)t_{12} - m_1t_{22})(1 + \alpha_1)) \\
& (1 + s_1(1 + (-1 + m_1)t_{12} - m_1t_{22}) + m_1t_{22}\alpha_2 + t_{12}(\alpha_2 - m_1\alpha_2)))) , \\
& - \frac{1}{4} \left( - \left( (dd_1(-1 + m_1) - dd_2m_1 - p_{12}t_{12} + m_1p_{12}t_{12} - m_1p_{22}t_{22})(dd_1(-1 + m_1) - \right. \right. \\
& dd_2m_1 + t_{12} - m_1t_{12} - p_{12}t_{12} + m_1p_{12}t_{12} + m_1t_{22} - m_1p_{22}t_{22})) / \\
& (1 + (1 + (-1 + m_1)t_{12} - m_1t_{22})\alpha_1 + s_1(1 + (-1 + m_1)t_{12} - m_1t_{22})(1 + \alpha_1)) + \\
& (r(dd_1(-1 + m_1) - dd_2m_1 - p_{12}t_{12} + m_1p_{12}t_{12} - m_1p_{22}t_{22}) \\
& (-1 + dd_1(-1 + m_1) - dd_2m_1 + p_{12} - m_1p_{12} + m_1p_{22} + t_{12} - \\
& m_1t_{12} - p_{12}t_{12} + m_1p_{12}t_{12} + m_1t_{22} - m_1p_{22}t_{22})) / \\
& (1 + (1 + (-1 + m_1)t_{12} - m_1t_{22})\alpha_1 + s_1(1 + (-1 + m_1)t_{12} - m_1t_{22})(1 + \alpha_1)) - \\
& ((dd_1(-1 + m_1) - dd_2m_1 + t_{12} - m_1t_{12} - p_{12}t_{12} + m_1p_{12}t_{12} + m_1t_{22} - m_1p_{22}t_{22}) \\
& (-1 + dd_1(-1 + m_1) - dd_2m_1 + p_{12} - m_1p_{12} + m_1p_{22} + t_{12} - \\
& m_1t_{12} - p_{12}t_{12} + m_1p_{12}t_{12} + m_1t_{22} - m_1p_{22}t_{22})) / \\
& (1 + (1 + (-1 + m_1)t_{12} - m_1t_{22})\alpha_1 + s_1(1 + (-1 + m_1)t_{12} - m_1t_{22})(1 + \alpha_1)) + \\
& (2(dd_1 - dd_1m_1 + dd_2m_1 - t_{12} + m_1t_{12} + p_{12}t_{12} - m_1p_{12}t_{12} - m_1t_{22} + m_1p_{22}t_{22})^2) / \\
& (1 + (1 + (-1 + m_1)t_{12} - m_1t_{22})\alpha_1 + s_1(1 + (-1 + m_1)t_{12} - m_1t_{22})(1 + \alpha_1)) - \\
& ((-1 + r)(1 + s_1)(dd_1(-1 + m_1) - dd_2m_1 + p_{12} - m_1p_{12} + m_1p_{22} - \\
& p_{12}t_{12} + m_1p_{12}t_{12} - m_1p_{22}t_{22})(dd_1(-1 + m_1) - dd_2m_1 + t_{12} - \\
& m_1t_{12} - p_{12}t_{12} + m_1p_{12}t_{12} + m_1t_{22} - m_1p_{22}t_{22})(1 + \alpha_1)) / \\
& (1 + (1 + (-1 + m_1)t_{12} - m_1t_{22})\alpha_1 + s_1(1 + (-1 + m_1)t_{12} - m_1t_{22})(1 + \alpha_1)) - \\
& ((1 + s_1)(dd_1(-1 + m_1) - dd_2m_1 + t_{12} - m_1t_{12} - p_{12}t_{12} + m_1p_{12}t_{12} + \\
& m_1t_{22} - m_1p_{22}t_{22})(-1 + dd_1(-1 + m_1) - dd_2m_1 + p_{12} - m_1p_{12} + m_1p_{22} +
\end{aligned}$$

$$\begin{aligned}
& \frac{t12 - m1 t12 - p12 t12 + m1 p12 t12 + m1 t22 - m1 p22 t22}{(1 + (1 + (-1 + m1) t12 - m1 t22) \alpha_1 + s1 (1 + (-1 + m1) t12 - m1 t22) (1 + \alpha_1))} + \\
& \frac{((dd1 (-1 + m1) - dd2 m1 - p12 t12 + m1 p12 t12 - m1 p22 t22) (dd1 (-1 + m1) - dd2 m1 + t12 - m1 t12 - p12 t12 + m1 p12 t12 + m1 t22 - m1 p22 t22) (1 + \alpha_2))}{(-1 + s1 (-1 + t12 - m1 t12 + m1 t22) + (-1 + m1) t12 \alpha_2 - m1 t22 \alpha_2) +} \\
& \frac{((-1 + r) (dd1 (-1 + m1) - dd2 m1 + p12 - m1 p12 + m1 p22 - p12 t12 + m1 p12 t12 - m1 p22 t22) (dd1 (-1 + m1) - dd2 m1 + t12 - m1 t12 - p12 t12 + m1 p12 t12 + m1 t22 - m1 p22 t22) (1 + \alpha_2))}{(-1 + s1 (-1 + t12 - m1 t12 + m1 t22) + (-1 + m1) t12 \alpha_2 - m1 t22 \alpha_2) +} \\
& \frac{(r (1 + s1) (dd1 (-1 + m1) - dd2 m1 - p12 t12 + m1 p12 t12 - m1 p22 t22) (-1 + dd1 (-1 + m1) - dd2 m1 + p12 - m1 p12 + m1 p22 + t12 - m1 t12 - p12 t12 + m1 p12 t12 + m1 t22 - m1 p22 t22))}{(1 + s1 (1 + (-1 + m1) t12 - m1 t22) + m1 t22 \alpha_2 + t12 (\alpha_2 - m1 \alpha_2))} \\
& \frac{((r (dd1 (-1 + m1) - dd2 m1 - p12 t12 + m1 p12 t12 - m1 p22 t22) (-1 + dd1 (-1 + m1) - dd2 m1 + p12 - m1 p12 + m1 p22 + t12 - m1 t12 - p12 t12 + m1 p12 t12 + m1 t22 - m1 p22 t22))}{(1 + (1 + (-1 + m1) t12 - m1 t22) \alpha_1 + s1 (1 + (-1 + m1) t12 - m1 t22) (1 + \alpha_1))} - \\
& \frac{((-1 + r) (1 + s1) (dd1 (-1 + m1) - dd2 m1 + p12 - m1 p12 + m1 p22 - p12 t12 + m1 p12 t12 - m1 p22 t22) (dd1 (-1 + m1) - dd2 m1 + t12 - m1 t12 - p12 t12 + m1 p12 t12 + m1 t22 - m1 p22 t22) (1 + \alpha_1))}{(1 + (1 + (-1 + m1) t12 - m1 t22) \alpha_1 + s1 (1 + (-1 + m1) t12 - m1 t22) (1 + \alpha_1))} - \\
& \frac{((1 + s1) (dd1 (-1 + m1) - dd2 m1 + p12 - m1 p12 + m1 p22 - p12 t12 + m1 p12 t12 - m1 p22 t22) (-1 + dd1 (-1 + m1) - dd2 m1 + p12 - m1 p12 + m1 p22 + t12 - m1 t12 - p12 t12 + m1 p12 t12 + m1 t22 - m1 p22 t22) (1 + \alpha_1))}{(1 + (1 + (-1 + m1) t12 - m1 t22) \alpha_1 + s1 (1 + (-1 + m1) t12 - m1 t22) (1 + \alpha_1))} + \\
& \frac{((dd1 (-1 + m1) - dd2 m1 - p12 t12 + m1 p12 t12 - m1 p22 t22) (dd1 (-1 + m1) - dd2 m1 + p12 - m1 p12 + m1 p22 - p12 t12 + m1 p12 t12 - m1 p22 t22) (1 + \alpha_2))}{(-1 + s1 (-1 + t12 - m1 t12 + m1 t22) + (-1 + m1) t12 \alpha_2 - m1 t22 \alpha_2) +} \\
& \frac{((-1 + r) (dd1 (-1 + m1) - dd2 m1 + p12 - m1 p12 + m1 p22 - p12 t12 + m1 p12 t12 - m1 p22 t22) (dd1 (-1 + m1) - dd2 m1 + t12 - m1 t12 - p12 t12 + m1 p12 t12 + m1 t22 - m1 p22 t22) (1 + \alpha_2))}{(-1 + s1 (-1 + t12 - m1 t12 + m1 t22) + (-1 + m1) t12 \alpha_2 - m1 t22 \alpha_2) -} \\
& \frac{((1 + s1) (dd1 (-1 + m1) - dd2 m1 - p12 t12 + m1 p12 t12 - m1 p22 t22) (dd1 (-1 + m1) - dd2 m1 + p12 - m1 p12 + m1 p22 - p12 t12 + m1 p12 t12 - m1 p22 t22))}{(1 + s1 (1 + (-1 + m1) t12 - m1 t22) + m1 t22 \alpha_2 + t12 (\alpha_2 - m1 \alpha_2))} + \\
& \frac{(r (1 + s1) (dd1 (-1 + m1) - dd2 m1 - p12 t12 + m1 p12 t12 - m1 p22 t22) (-1 + dd1 (-1 + m1) - dd2 m1 + p12 - m1 p12 + m1 p22 + t12 - m1 t12 - p12 t12 + m1 p12 t12 + m1 t22 - m1 p22 t22))}{(1 + s1 (1 + (-1 + m1) t12 - m1 t22) + m1 t22 \alpha_2 + t12 (\alpha_2 - m1 \alpha_2))} - \\
& \frac{((1 + s1) (dd1 (-1 + m1) - dd2 m1 + p12 - m1 p12 + m1 p22 - p12 t12 + m1 p12 t12 - m1 p22 t22) (-1 + dd1 (-1 + m1) - dd2 m1 + p12 - m1 p12 + m1 p22 + t12 - m1 t12 - p12 t12 + m1 p12 t12 + m1 t22 - m1 p22 t22))}{(1 + s1 (1 + (-1 + m1) t12 - m1 t22) + m1 t22 \alpha_2 + t12 (\alpha_2 - m1 \alpha_2))} + \frac{2 (1 + s1) (dd1 - dd1 m1 + dd2 m1 - p12 + m1 p12 - m1 p22 + p12 t12 - m1 p12 t12 + m1 p22 t22)^2}{(1 + s1 (1 + (-1 + m1) t12 - m1 t22) + m1 t22 \alpha_2 + t12 (\alpha_2 - m1 \alpha_2))} + \\
& \frac{1}{4} \left( - \left( (-1 + r) (dd1 (-1 + m1) - dd2 m1 - p12 t12 + m1 p12 t12 - m1 p22 t22) (-1 + dd1 (-1 + m1) - dd2 m1 + p12 - m1 p12 + m1 p22 + t12 - m1 t12 - p12 t12 + m1 p12 t12 + m1 t22 - m1 p22 t22) \right) \right) /
\end{aligned}$$

[illegible]



$$\begin{aligned}
& \left( \text{dd1} (-1 + m1) - \text{dd2} m1 + p12 - m1 p12 + m1 p22 - p12 t12 + m1 p12 t12 - m1 p22 t22 \right) / \\
& \left( (1 + s1 (1 + (-1 + m1) t12 - m1 t22) + m1 t22 \alpha2 + t12 (\alpha2 - m1 \alpha2)) - \right. \\
& \left( (-1 + r) (1 + s1) (\text{dd1} (-1 + m1) - \text{dd2} m1 - p12 t12 + m1 p12 t12 - m1 p22 t22) \right. \\
& \left. (-1 + \text{dd1} (-1 + m1) - \text{dd2} m1 + p12 - m1 p12 + m1 p22 + t12 - \right. \\
& \left. m1 t12 - p12 t12 + m1 p12 t12 + m1 t22 - m1 p22 t22) \right) / \\
& \left( (1 + s1 (1 + (-1 + m1) t12 - m1 t22) + m1 t22 \alpha2 + t12 (\alpha2 - m1 \alpha2)) + \right. \\
& \left. (r (\text{dd1} (-1 + m1) - \text{dd2} m1 + p12 - m1 p12 + m1 p22 - p12 t12 + m1 p12 t12 - m1 p22 t22) \right. \\
& \left. (\text{dd1} (-1 + m1) - \text{dd2} m1 + t12 - m1 t12 - p12 t12 + m1 p12 t12 + m1 t22 - m1 p22 t22) \right. \\
& \left. (1 + \alpha2) \right) / (1 + s1 (1 + (-1 + m1) t12 - m1 t22) + m1 t22 \alpha2 + t12 (\alpha2 - m1 \alpha2)) + \\
& \left( 2 (\text{dd1} - \text{dd1} m1 + \text{dd2} m1 + p12 t12 - m1 p12 t12 + m1 p22 t22)^2 (1 + \alpha2) \right) / \\
& \left( (1 + s1 (1 + (-1 + m1) t12 - m1 t22) + m1 t22 \alpha2 + t12 (\alpha2 - m1 \alpha2)) \right), \\
& (\text{dd2} (s2 - \alpha1) (1 + t22 \alpha2 + s2 t22 (1 + \alpha2)) - m2^3 (p12 - p22) (t12 - t22) \\
& (p12 \alpha1 - p22 \alpha1 + p12 \alpha2 - p22 \alpha2 + p12 \alpha1 \alpha2 - p22 \alpha1 \alpha2 + \\
& t12 \alpha1 \alpha2 - t22 \alpha1 \alpha2 - s2^2 (t12 - t22) (1 + \alpha2) + \\
& s2 ((t12 - t22) (\alpha1 - \alpha2 + \alpha1 \alpha2) + p12 (\alpha1 + \alpha2 + \alpha1 \alpha2) - p22 (\alpha1 + \alpha2 + \alpha1 \alpha2))) + \\
& p22 (2 + \text{dd2} \alpha2 + 2 t22 \alpha2 + 2 s2^2 t22^2 (1 + \alpha2) + \\
& \alpha1 (\text{dd2} (1 + \alpha2) - 2 (-1 + t22) (1 + t22 \alpha2)) + \\
& s2 (-2 t22^2 (\alpha1 - \alpha2 + \alpha1 \alpha2) + \text{dd2} (\alpha1 + \alpha2 + \alpha1 \alpha2) + 2 t22 (2 + \alpha1 + \alpha2 + \alpha1 \alpha2))) + \\
& m2^2 ((\text{dd1} - \text{dd2}) (t12 - t22) (s2 - \alpha1) (s2 + \alpha2 + s2 \alpha2) + p12^2 (1 + s2) \\
& (t12 - t22) (\alpha1 + \alpha2 + \alpha1 \alpha2) + 2 p22^2 (1 + s2) (t12 - t22) (\alpha1 + \alpha2 + \alpha1 \alpha2) + \\
& p12 (\text{dd1} \alpha1 - \text{dd2} \alpha1 - t12 \alpha1 - 3 p22 t12 \alpha1 + t22 \alpha1 + 3 p22 t22 \alpha1 + \text{dd1} \alpha2 - \\
& \text{dd2} \alpha2 + 2 t12 \alpha2 - 3 p22 t12 \alpha2 - 2 t22 \alpha2 + 3 p22 t22 \alpha2 + \text{dd1} \alpha1 \alpha2 - \text{dd2} \alpha1 \alpha2 + \\
& 2 t12 \alpha1 \alpha2 - 3 p22 t12 \alpha1 \alpha2 - t12^2 \alpha1 \alpha2 - 2 t22 \alpha1 \alpha2 + 3 p22 t22 \alpha1 \alpha2 - \\
& t12 t22 \alpha1 \alpha2 + 2 t22^2 \alpha1 \alpha2 + s2^2 (t12^2 + t12 t22 - 2 t22^2) (1 + \alpha2) - \\
& s2 (t12^2 (\alpha1 - \alpha2 + \alpha1 \alpha2) - 2 t22^2 (\alpha1 - \alpha2 + \alpha1 \alpha2) - (\text{dd1} - \text{dd2}) \\
& (\alpha1 + \alpha2 + \alpha1 \alpha2) + t22 (3 + (-2 - 3 p22) \alpha2 - (-2 + 3 p22) \alpha1 (1 + \alpha2))) + t12 \\
& (-3 + (-2 + 3 p22 - t22) \alpha2 + (-2 + 3 p22 + t22) \alpha1 (1 + \alpha2))) + \\
& p22 (-\text{dd1} \alpha1 + \text{dd2} \alpha1 + t12 \alpha1 - t22 \alpha1 - \text{dd1} \alpha2 + \text{dd2} \alpha2 - 2 t12 \alpha2 + \\
& 2 t22 \alpha2 - \text{dd1} \alpha1 \alpha2 + \text{dd2} \alpha1 \alpha2 - 2 t12 \alpha1 \alpha2 - t12^2 \alpha1 \alpha2 + 2 t22 \alpha1 \alpha2 + \\
& 5 t12 t22 \alpha1 \alpha2 - 4 t22^2 \alpha1 \alpha2 + s2^2 (t12^2 - 5 t12 t22 + 4 t22^2) (1 + \alpha2) - \\
& s2 (t12^2 (\alpha1 - \alpha2 + \alpha1 \alpha2) + 4 t22^2 (\alpha1 - \alpha2 + \alpha1 \alpha2) + (\text{dd1} - \text{dd2}) \\
& (\alpha1 + \alpha2 + \alpha1 \alpha2) - t22 (3 + 2 \alpha2 + 2 \alpha1 (1 + \alpha2))) + t12 \\
& (3 + 2 \alpha2 + 5 t22 \alpha2 - (-2 + 5 t22) \alpha1 (1 + \alpha2)))) + \\
& m2 (-p22^2 (1 + s2) (t12 - t22) (\alpha1 + \alpha2 + \alpha1 \alpha2) + (s2 - \alpha1) (\text{dd2} (-1 + t12 \alpha2 - \\
& 2 t22 \alpha2 + s2 (t12 - 2 t22) (1 + \alpha2)) + \text{dd1} (1 + t22 \alpha2 + s2 t22 (1 + \alpha2))) + \\
& p22 (-2 - 2 \alpha1 + \text{dd1} \alpha1 - 2 \text{dd2} \alpha1 - t12 \alpha1 + 3 t22 \alpha1 + \text{dd1} \alpha2 - 2 \text{dd2} \alpha2 + \\
& 2 t12 \alpha2 - 4 t22 \alpha2 + \text{dd1} \alpha1 \alpha2 - 2 \text{dd2} \alpha1 \alpha2 + 2 t12 \alpha1 \alpha2 - 4 t22 \alpha1 \alpha2 - \\
& 3 t12 t22 \alpha1 \alpha2 + 5 t22^2 \alpha1 \alpha2 + s2^2 (3 t12 - 5 t22) t22 (1 + \alpha2) + \\
& s2 (5 t22^2 (\alpha1 - \alpha2 + \alpha1 \alpha2) + (\text{dd1} - 2 \text{dd2}) (\alpha1 + \alpha2 + \alpha1 \alpha2) - t22 (7 + 4 \alpha2 + \\
& 4 \alpha1 (1 + \alpha2))) + t12 (3 + 2 \alpha2 + 3 t22 \alpha2 - (-2 + 3 t22) \alpha1 (1 + \alpha2)))) + \\
& p12 (2 + 2 \alpha1 + \text{dd2} \alpha1 - t12 \alpha1 + p22 t12 \alpha1 - t22 \alpha1 - p22 t22 \alpha1 + \text{dd2} \alpha2 + \\
& p22 t12 \alpha2 + 2 t22 \alpha2 - p22 t22 \alpha2 + \text{dd2} \alpha1 \alpha2 + p22 t12 \alpha1 \alpha2 + \\
& 2 t22 \alpha1 \alpha2 - p22 t22 \alpha1 \alpha2 - t12 t22 \alpha1 \alpha2 - t22^2 \alpha1 \alpha2 + \\
& s2^2 t22 (t12 + t22) (1 + \alpha2) + s2 (-t22^2 (\alpha1 - \alpha2 + \alpha1 \alpha2) + \text{dd2} \\
& (\alpha1 + \alpha2 + \alpha1 \alpha2) - t22 (-3 + (-2 + p22) \alpha2 + (-2 + p22) \alpha1 (1 + \alpha2))) + \\
& t12 (1 - t22 (\alpha1 - \alpha2 + \alpha1 \alpha2) + p22 (\alpha1 + \alpha2 + \alpha1 \alpha2)))) / \\
& (2 (1 + s2 t22 + m2 (t12 - t22) (s2 - \alpha1) + \alpha1 - t22 \alpha1) (1 + t22 \alpha2 + \\
& s2 t22 (1 + \alpha2) + m2 (t12 - t22) (s2 + \alpha2 + s2 \alpha2))), \\
& ((m2 (t12 - t22) + t22) (2 + m2 p12 \alpha2 + p22 \alpha2 - m2 p22 \alpha2 + 2 m2 t12 \alpha2 - \\
& m2^2 p12 t12 \alpha2 - m2 p22 t12 \alpha2 + m2^2 p22 t12 \alpha2 +
\end{aligned}$$

$$\begin{aligned}
& 2 t_{22} \alpha_2 - 2 m_2 t_{22} \alpha_2 - m_2 p_{12} t_{22} \alpha_2 + m_2^2 p_{12} t_{22} \alpha_2 - \\
& p_{22} t_{22} \alpha_2 + 2 m_2 p_{22} t_{22} \alpha_2 - m_2^2 p_{22} t_{22} \alpha_2 + \\
& s_2^2 \left( m_2^2 (t_{12} - t_{22})^2 + t_{22} (1 + t_{22}) + m_2 (t_{12} - t_{22}) (1 + 2 t_{22}) \right) (1 + \alpha_2) - \\
& (-1 + m_2 (t_{12} - t_{22}) + t_{22}) \alpha_1 \\
& (1 + p_{22} + p_{22} \alpha_2 + t_{22} \alpha_2 + m_2 ((t_{12} - t_{22}) \alpha_2 + p_{12} (1 + \alpha_2) - p_{22} (1 + \alpha_2))) - \\
& s_2 (-1 - 3 t_{22} - p_{22} \alpha_1 - t_{22} \alpha_1 + p_{22} t_{22} \alpha_1 + t_{22}^2 \alpha_1 - p_{22} \alpha_2 - 3 t_{22} \alpha_2 + p_{22} t_{22} \alpha_2 - \\
& t_{22}^2 \alpha_2 - p_{22} \alpha_1 \alpha_2 - t_{22} \alpha_1 \alpha_2 + p_{22} t_{22} \alpha_1 \alpha_2 + t_{22}^2 \alpha_1 \alpha_2 + m_2^2 (t_{12} - t_{22}) \\
& ((t_{12} - t_{22}) (\alpha_1 - \alpha_2 + \alpha_1 \alpha_2) + p_{12} (\alpha_1 + \alpha_2 + \alpha_1 \alpha_2) - p_{22} (\alpha_1 + \alpha_2 + \alpha_1 \alpha_2)) + \\
& m_2 (-2 t_{22}^2 (\alpha_1 - \alpha_2 + \alpha_1 \alpha_2) - (p_{12} - p_{22}) (\alpha_1 + \alpha_2 + \alpha_1 \alpha_2) + \\
& t_{22} (3 + (3 + p_{12} - 2 p_{22}) \alpha_2 + (1 + p_{12} - 2 p_{22}) \alpha_1 (1 + \alpha_2)) + \\
& t_{12} (-3 + (-3 + p_{22} - 2 t_{22}) \alpha_2 + (-1 + p_{22} + 2 t_{22}) \alpha_1 (1 + \alpha_2))) \Big) \Big) / \\
& (2 (1 + s_2 t_{22} + m_2 (t_{12} - t_{22}) (s_2 - \alpha_1) + \alpha_1 - t_{22} \alpha_1) (1 + t_{22} \alpha_2 + \\
& s_2 t_{22} (1 + \alpha_2) + m_2 (t_{12} - t_{22}) (s_2 + \alpha_2 + s_2 \alpha_2))), \\
& - \frac{1}{4} \left( (r (1 + s_2) (dd_2 + dd_1 m_2 - dd_2 m_2 + m_2 p_{12} t_{12} + p_{22} t_{22} - m_2 p_{22} t_{22}) \right. \\
& (1 + dd_2 + dd_1 m_2 - dd_2 m_2 - m_2 p_{12} - p_{22} + m_2 p_{22} - m_2 t_{12} + \\
& m_2 p_{12} t_{12} - t_{22} + m_2 t_{22} + p_{22} t_{22} - m_2 p_{22} t_{22})) / \\
& (1 + s_2 t_{22} + m_2 (t_{12} - t_{22}) (s_2 - \alpha_1) + \alpha_1 - t_{22} \alpha_1) - ((-1 + r) \\
& (dd_2 (-1 + m_2) - dd_1 m_2 + m_2 p_{12} + p_{22} - m_2 p_{22} - m_2 p_{12} t_{12} - p_{22} t_{22} + m_2 p_{22} t_{22}) \\
& (dd_2 (-1 + m_2) - dd_1 m_2 + m_2 t_{12} - m_2 p_{12} t_{12} + t_{22} - m_2 t_{22} - p_{22} t_{22} + m_2 p_{22} t_{22}) \\
& (1 + \alpha_1)) / (1 + s_2 t_{22} + m_2 (t_{12} - t_{22}) (s_2 - \alpha_1) + \alpha_1 - t_{22} \alpha_1) - \\
& ((dd_2 (-1 + m_2) - dd_1 m_2 + m_2 p_{12} + p_{22} - m_2 p_{22} - m_2 p_{12} t_{12} - p_{22} t_{22} + m_2 p_{22} t_{22}) \\
& (-1 + dd_2 (-1 + m_2) - dd_1 m_2 + m_2 p_{12} + p_{22} - m_2 p_{22} + m_2 t_{12} - \\
& m_2 p_{12} t_{12} + t_{22} - m_2 t_{22} - p_{22} t_{22} + m_2 p_{22} t_{22}) (1 + \alpha_1)) / \\
& (1 + s_2 t_{22} + m_2 (t_{12} - t_{22}) (s_2 - \alpha_1) + \alpha_1 - t_{22} \alpha_1) + \\
& (2 (dd_2 + dd_1 m_2 - dd_2 m_2 - m_2 p_{12} - p_{22} + m_2 p_{22} + m_2 p_{12} t_{12} + p_{22} t_{22} - m_2 p_{22} t_{22})^2) / \\
& (1 + t_{22} \alpha_2 + s_2 t_{22} (1 + \alpha_2) + m_2 (t_{12} - t_{22}) (s_2 + \alpha_2 + s_2 \alpha_2)) - \\
& ((dd_2 (-1 + m_2) - dd_1 m_2 - m_2 p_{12} t_{12} - p_{22} t_{22} + m_2 p_{22} t_{22}) \\
& (dd_2 (-1 + m_2) - dd_1 m_2 + m_2 p_{12} + p_{22} - m_2 p_{22} - m_2 p_{12} t_{12} - p_{22} t_{22} + m_2 p_{22} t_{22})) / \\
& (1 + t_{22} \alpha_2 + s_2 t_{22} (1 + \alpha_2) + m_2 (t_{12} - t_{22}) (s_2 + \alpha_2 + s_2 \alpha_2)) + \\
& (r (dd_2 (-1 + m_2) - dd_1 m_2 - m_2 p_{12} t_{12} - p_{22} t_{22} + m_2 p_{22} t_{22}) \\
& (-1 + dd_2 (-1 + m_2) - dd_1 m_2 + m_2 p_{12} + p_{22} - m_2 p_{22} + \\
& m_2 t_{12} - m_2 p_{12} t_{12} + t_{22} - m_2 t_{22} - p_{22} t_{22} + m_2 p_{22} t_{22})) / \\
& (1 + t_{22} \alpha_2 + s_2 t_{22} (1 + \alpha_2) + m_2 (t_{12} - t_{22}) (s_2 + \alpha_2 + s_2 \alpha_2)) - \\
& ((dd_2 (-1 + m_2) - dd_1 m_2 + m_2 p_{12} + p_{22} - m_2 p_{22} - m_2 p_{12} t_{12} - p_{22} t_{22} + m_2 p_{22} t_{22}) \\
& (-1 + dd_2 (-1 + m_2) - dd_1 m_2 + m_2 p_{12} + p_{22} - m_2 p_{22} + \\
& m_2 t_{12} - m_2 p_{12} t_{12} + t_{22} - m_2 t_{22} - p_{22} t_{22} + m_2 p_{22} t_{22})) / \\
& (1 + t_{22} \alpha_2 + s_2 t_{22} (1 + \alpha_2) + m_2 (t_{12} - t_{22}) (s_2 + \alpha_2 + s_2 \alpha_2)) - \\
& ((1 + s_2) (dd_2 + dd_1 m_2 - dd_2 m_2 + m_2 p_{12} t_{12} + p_{22} t_{22} - m_2 p_{22} t_{22}) \\
& (dd_2 + dd_1 m_2 - dd_2 m_2 - m_2 p_{12} - p_{22} + m_2 p_{22} + m_2 p_{12} t_{12} + p_{22} t_{22} - m_2 p_{22} t_{22}) \\
& (1 + \alpha_2)) / (1 + t_{22} \alpha_2 + s_2 t_{22} (1 + \alpha_2) + m_2 (t_{12} - t_{22}) (s_2 + \alpha_2 + s_2 \alpha_2)) - \\
& ((-1 + r) (1 + s_2) (dd_2 + dd_1 m_2 - dd_2 m_2 - m_2 p_{12} - p_{22} + m_2 p_{22} + m_2 p_{12} t_{12} + \\
& p_{22} t_{22} - m_2 p_{22} t_{22}) (dd_2 + dd_1 m_2 - dd_2 m_2 - m_2 t_{12} + \\
& m_2 p_{12} t_{12} - t_{22} + m_2 t_{22} + p_{22} t_{22} - m_2 p_{22} t_{22}) (1 + \alpha_2)) / \\
& (1 + t_{22} \alpha_2 + s_2 t_{22} (1 + \alpha_2) + m_2 (t_{12} - t_{22}) (s_2 + \alpha_2 + s_2 \alpha_2)) \Big) \\
& (- ((1 + s_2) (dd_2 + dd_1 m_2 - dd_2 m_2 + m_2 p_{12} t_{12} + p_{22} t_{22} - m_2 p_{22} t_{22}) (dd_2 + \\
& dd_1 m_2 - dd_2 m_2 - m_2 t_{12} + m_2 p_{12} t_{12} - t_{22} + m_2 t_{22} + p_{22} t_{22} - m_2 p_{22} t_{22})) / \\
& (1 + s_2 t_{22} + m_2 (t_{12} - t_{22}) (s_2 - \alpha_1) + \alpha_1 - t_{22} \alpha_1)) + (2 (1 + s_2)
\end{aligned}$$

$$\begin{aligned}
& \left( dd2 + dd1 m2 - dd2 m2 - m2 t12 + m2 p12 t12 - t22 + m2 t22 + p22 t22 - m2 p22 t22 \right)^2 \Big/ \\
& \left( 1 + s2 t22 + m2 (t12 - t22) (s2 - \alpha1) + \alpha1 - t22 \alpha1 \right) + \\
& \left( r (1 + s2) (dd2 + dd1 m2 - dd2 m2 + m2 p12 t12 + p22 t22 - m2 p22 t22) \right. \\
& \quad \left. (1 + dd2 + dd1 m2 - dd2 m2 - m2 p12 - p22 + m2 p22 - m2 t12 + m2 p12 t12 - t22 + m2 t22 + \right. \\
& \quad \left. p22 t22 - m2 p22 t22) \right) \Big/ \left( 1 + s2 t22 + m2 (t12 - t22) (s2 - \alpha1) + \alpha1 - t22 \alpha1 \right) - \\
& \left( (1 + s2) (dd2 (-1 + m2) - dd1 m2 + m2 t12 - m2 p12 t12 + t22 - m2 t22 - \right. \\
& \quad \left. p22 t22 + m2 p22 t22) (-1 + dd2 (-1 + m2) - dd1 m2 + m2 p12 + p22 - \right. \\
& \quad \left. m2 p22 + m2 t12 - m2 p12 t12 + t22 - m2 t22 - p22 t22 + m2 p22 t22) \right) \Big/ \\
& \left( 1 + s2 t22 + m2 (t12 - t22) (s2 - \alpha1) + \alpha1 - t22 \alpha1 \right) - \left( (-1 + r) \right. \\
& \quad \left( dd2 (-1 + m2) - dd1 m2 + m2 p12 + p22 - m2 p22 - m2 p12 t12 - p22 t22 + m2 p22 t22) \right. \\
& \quad \left( dd2 (-1 + m2) - dd1 m2 + m2 t12 - m2 p12 t12 + t22 - m2 t22 - p22 t22 + m2 p22 t22) \right. \\
& \quad \left. (1 + \alpha1) \right) \Big/ \left( 1 + s2 t22 + m2 (t12 - t22) (s2 - \alpha1) + \alpha1 - t22 \alpha1 \right) - \\
& \left( (dd2 (-1 + m2) - dd1 m2 + m2 t12 - m2 p12 t12 + t22 - m2 t22 - p22 t22 + m2 p22 t22) \right. \\
& \quad \left. (-1 + dd2 (-1 + m2) - dd1 m2 + m2 p12 + p22 - m2 p22 + m2 t12 - \right. \\
& \quad \left. m2 p12 t12 + t22 - m2 t22 - p22 t22 + m2 p22 t22) (1 + \alpha1) \right) \Big/ \\
& \left( 1 + s2 t22 + m2 (t12 - t22) (s2 - \alpha1) + \alpha1 - t22 \alpha1 \right) + \\
& \left( r (dd2 (-1 + m2) - dd1 m2 - m2 p12 t12 - p22 t22 + m2 p22 t22) \right. \\
& \quad \left. (-1 + dd2 (-1 + m2) - dd1 m2 + m2 p12 + p22 - m2 p22 + \right. \\
& \quad \left. m2 t12 - m2 p12 t12 + t22 - m2 t22 - p22 t22 + m2 p22 t22) \right) \Big/ \\
& \left( 1 + t22 \alpha2 + s2 t22 (1 + \alpha2) + m2 (t12 - t22) (s2 + \alpha2 + s2 \alpha2) \right) - \\
& \left( (1 + s2) (dd2 + dd1 m2 - dd2 m2 + m2 p12 t12 + p22 t22 - m2 p22 t22) \right. \\
& \quad \left( dd2 + dd1 m2 - dd2 m2 - m2 t12 + m2 p12 t12 - t22 + m2 t22 + p22 t22 - m2 p22 t22) \right. \\
& \quad \left. (1 + \alpha2) \right) \Big/ \left( 1 + t22 \alpha2 + s2 t22 (1 + \alpha2) + m2 (t12 - t22) (s2 + \alpha2 + s2 \alpha2) \right) - \\
& \left( (-1 + r) (1 + s2) (dd2 + dd1 m2 - dd2 m2 - m2 p12 - p22 + m2 p22 + m2 p12 t12 + \right. \\
& \quad \left. p22 t22 - m2 p22 t22) (dd2 + dd1 m2 - dd2 m2 - m2 t12 + \right. \\
& \quad \left. m2 p12 t12 - t22 + m2 t22 + p22 t22 - m2 p22 t22) (1 + \alpha2) \right) \Big/ \\
& \left( 1 + t22 \alpha2 + s2 t22 (1 + \alpha2) + m2 (t12 - t22) (s2 + \alpha2 + s2 \alpha2) \right) \Big) + \\
& \frac{1}{4} \left( - \left( (-1 + r) (1 + s2) (dd2 + dd1 m2 - dd2 m2 + m2 p12 t12 + p22 t22 - m2 p22 t22) \right. \right. \\
& \quad \left. \left( 1 + dd2 + dd1 m2 - dd2 m2 - m2 p12 - p22 + m2 p22 - m2 t12 + \right. \right. \\
& \quad \left. \left. m2 p12 t12 - t22 + m2 t22 + p22 t22 - m2 p22 t22) \right) \right) \Big/ \\
& \left( 1 + s2 t22 + m2 (t12 - t22) (s2 - \alpha1) + \alpha1 - t22 \alpha1 \right) - \\
& \left( (1 + s2) (dd2 (-1 + m2) - dd1 m2 + m2 t12 - m2 p12 t12 + t22 - m2 t22 - \right. \\
& \quad \left. p22 t22 + m2 p22 t22) (-1 + dd2 (-1 + m2) - dd1 m2 + m2 p12 + p22 - \right. \\
& \quad \left. m2 p22 + m2 t12 - m2 p12 t12 + t22 - m2 t22 - p22 t22 + m2 p22 t22) \right) \Big/ \\
& \left( 1 + s2 t22 + m2 (t12 - t22) (s2 - \alpha1) + \alpha1 - t22 \alpha1 \right) + \\
& \left( r (dd2 (-1 + m2) - dd1 m2 + m2 p12 + p22 - m2 p22 - m2 p12 t12 - p22 t22 + m2 p22 t22) \right. \\
& \quad \left( dd2 (-1 + m2) - dd1 m2 + m2 t12 - m2 p12 t12 + t22 - m2 t22 - p22 t22 + m2 p22 t22) \right. \\
& \quad \left. (1 + \alpha1) \right) \Big/ \left( 1 + s2 t22 + m2 (t12 - t22) (s2 - \alpha1) + \alpha1 - t22 \alpha1 \right) - \\
& \left( (dd2 (-1 + m2) - dd1 m2 + m2 p12 + p22 - m2 p22 - m2 p12 t12 - p22 t22 + m2 p22 t22) \right. \\
& \quad \left. (-1 + dd2 (-1 + m2) - dd1 m2 + m2 p12 + p22 - m2 p22 + m2 t12 - \right. \\
& \quad \left. m2 p12 t12 + t22 - m2 t22 - p22 t22 + m2 p22 t22) (1 + \alpha1) \right) \Big/ \\
& \left( 1 + s2 t22 + m2 (t12 - t22) (s2 - \alpha1) + \alpha1 - t22 \alpha1 \right) - \\
& \left( (dd2 (-1 + m2) - dd1 m2 + m2 t12 - m2 p12 t12 + t22 - m2 t22 - p22 t22 + m2 p22 t22) \right. \\
& \quad \left. (-1 + dd2 (-1 + m2) - dd1 m2 + m2 p12 + p22 - m2 p22 + m2 t12 - \right. \\
& \quad \left. m2 p12 t12 + t22 - m2 t22 - p22 t22 + m2 p22 t22) (1 + \alpha1) \right) \Big/ \\
& \left( 1 + s2 t22 + m2 (t12 - t22) (s2 - \alpha1) + \alpha1 - t22 \alpha1 \right) + \\
& \left( 2 (-1 + dd2 (-1 + m2) - dd1 m2 + m2 p12 + p22 - m2 p22 + m2 t12 - \right. \\
& \quad \left. m2 p12 t12 + t22 - m2 t22 - p22 t22 + m2 p22 t22)^2 (1 + \alpha1) \right) \Big/
\end{aligned}$$

$$\begin{aligned}
& \left( (1 + s_2 t_{22} + m_2 (t_{12} - t_{22}) (s_2 - \alpha_1) + \alpha_1 - t_{22} \alpha_1) - \right. \\
& \left( (-1 + r) (dd_2 (-1 + m_2) - dd_1 m_2 - m_2 p_{12} t_{12} - p_{22} t_{22} + m_2 p_{22} t_{22}) \right. \\
& \quad \left. (-1 + dd_2 (-1 + m_2) - dd_1 m_2 + m_2 p_{12} + p_{22} - m_2 p_{22} + \right. \\
& \quad \left. m_2 t_{12} - m_2 p_{12} t_{12} + t_{22} - m_2 t_{22} - p_{22} t_{22} + m_2 p_{22} t_{22}) \right) / \\
& \left( (1 + t_{22} \alpha_2 + s_2 t_{22} (1 + \alpha_2) + m_2 (t_{12} - t_{22}) (s_2 + \alpha_2 + s_2 \alpha_2)) - \right. \\
& \left( (dd_2 (-1 + m_2) - dd_1 m_2 + m_2 p_{12} + p_{22} - m_2 p_{22} - m_2 p_{12} t_{12} - p_{22} t_{22} + m_2 p_{22} t_{22}) \right. \\
& \quad \left. (-1 + dd_2 (-1 + m_2) - dd_1 m_2 + m_2 p_{12} + p_{22} - m_2 p_{22} + \right. \\
& \quad \left. m_2 t_{12} - m_2 p_{12} t_{12} + t_{22} - m_2 t_{22} - p_{22} t_{22} + m_2 p_{22} t_{22}) \right) / \\
& \left( (1 + t_{22} \alpha_2 + s_2 t_{22} (1 + \alpha_2) + m_2 (t_{12} - t_{22}) (s_2 + \alpha_2 + s_2 \alpha_2)) + \right. \\
& \left( r (1 + s_2) (dd_2 + dd_1 m_2 - dd_2 m_2 - m_2 p_{12} - p_{22} + m_2 p_{22} + m_2 p_{12} t_{12} + \right. \\
& \quad \left. p_{22} t_{22} - m_2 p_{22} t_{22}) (dd_2 + dd_1 m_2 - dd_2 m_2 - m_2 t_{12} + \right. \\
& \quad \left. m_2 p_{12} t_{12} - t_{22} + m_2 t_{22} + p_{22} t_{22} - m_2 p_{22} t_{22}) (1 + \alpha_2) \right) / \\
& \left. (1 + t_{22} \alpha_2 + s_2 t_{22} (1 + \alpha_2) + m_2 (t_{12} - t_{22}) (s_2 + \alpha_2 + s_2 \alpha_2)) \right) \\
& \left( - \left( (1 + s_2) (dd_2 + dd_1 m_2 - dd_2 m_2 + m_2 p_{12} t_{12} + p_{22} t_{22} - m_2 p_{22} t_{22}) (dd_2 + \right. \right. \\
& \quad \left. \left. dd_1 m_2 - dd_2 m_2 - m_2 t_{12} + m_2 p_{12} t_{12} - t_{22} + m_2 t_{22} + p_{22} t_{22} - m_2 p_{22} t_{22}) \right) / \right. \\
& \left( (1 + s_2 t_{22} + m_2 (t_{12} - t_{22}) (s_2 - \alpha_1) + \alpha_1 - t_{22} \alpha_1) \right) - \\
& \left( (-1 + r) (1 + s_2) (dd_2 + dd_1 m_2 - dd_2 m_2 + m_2 p_{12} t_{12} + p_{22} t_{22} - m_2 p_{22} t_{22}) \right. \\
& \quad \left. (1 + dd_2 + dd_1 m_2 - dd_2 m_2 - m_2 p_{12} - p_{22} + m_2 p_{22} - m_2 t_{12} + m_2 p_{12} t_{12} - t_{22} + m_2 t_{22} + \right. \\
& \quad \left. p_{22} t_{22} - m_2 p_{22} t_{22}) \right) / (1 + s_2 t_{22} + m_2 (t_{12} - t_{22}) (s_2 - \alpha_1) + \alpha_1 - t_{22} \alpha_1) + \\
& \left( r (dd_2 (-1 + m_2) - dd_1 m_2 + m_2 p_{12} + p_{22} - m_2 p_{22} - m_2 p_{12} t_{12} - p_{22} t_{22} + m_2 p_{22} t_{22}) \right. \\
& \quad \left. (dd_2 (-1 + m_2) - dd_1 m_2 + m_2 t_{12} - m_2 p_{12} t_{12} + t_{22} - m_2 t_{22} - p_{22} t_{22} + m_2 p_{22} t_{22}) \right. \\
& \quad \left. (1 + \alpha_1) \right) / (1 + s_2 t_{22} + m_2 (t_{12} - t_{22}) (s_2 - \alpha_1) + \alpha_1 - t_{22} \alpha_1) - \\
& \left( (dd_2 (-1 + m_2) - dd_1 m_2 - m_2 p_{12} t_{12} - p_{22} t_{22} + m_2 p_{22} t_{22}) \right. \\
& \quad \left. (dd_2 (-1 + m_2) - dd_1 m_2 + m_2 p_{12} + p_{22} - m_2 p_{22} - m_2 p_{12} t_{12} - p_{22} t_{22} + m_2 p_{22} t_{22}) \right) / \\
& \left( (1 + t_{22} \alpha_2 + s_2 t_{22} (1 + \alpha_2) + m_2 (t_{12} - t_{22}) (s_2 + \alpha_2 + s_2 \alpha_2)) - \right. \\
& \left( (-1 + r) (dd_2 (-1 + m_2) - dd_1 m_2 - m_2 p_{12} t_{12} - p_{22} t_{22} + m_2 p_{22} t_{22}) \right. \\
& \quad \left. (-1 + dd_2 (-1 + m_2) - dd_1 m_2 + m_2 p_{12} + p_{22} - m_2 p_{22} + \right. \\
& \quad \left. m_2 t_{12} - m_2 p_{12} t_{12} + t_{22} - m_2 t_{22} - p_{22} t_{22} + m_2 p_{22} t_{22}) \right) / \\
& \left( (1 + t_{22} \alpha_2 + s_2 t_{22} (1 + \alpha_2) + m_2 (t_{12} - t_{22}) (s_2 + \alpha_2 + s_2 \alpha_2)) + \right. \\
& \left. 2 (1 + s_2) (dd_2 + dd_1 m_2 - dd_2 m_2 + m_2 p_{12} t_{12} + p_{22} t_{22} - m_2 p_{22} t_{22})^2 (1 + \alpha_2) \right) / \\
& \left( (1 + t_{22} \alpha_2 + s_2 t_{22} (1 + \alpha_2) + m_2 (t_{12} - t_{22}) (s_2 + \alpha_2 + s_2 \alpha_2)) - \right. \\
& \left( (1 + s_2) (dd_2 + dd_1 m_2 - dd_2 m_2 + m_2 p_{12} t_{12} + p_{22} t_{22} - m_2 p_{22} t_{22}) \right. \\
& \quad \left. (dd_2 + dd_1 m_2 - dd_2 m_2 - m_2 p_{12} - p_{22} + m_2 p_{22} + m_2 p_{12} t_{12} + p_{22} t_{22} - m_2 p_{22} t_{22}) \right. \\
& \quad \left. (1 + \alpha_2) \right) / (1 + t_{22} \alpha_2 + s_2 t_{22} (1 + \alpha_2) + m_2 (t_{12} - t_{22}) (s_2 + \alpha_2 + s_2 \alpha_2)) - \\
& \left( (1 + s_2) (dd_2 + dd_1 m_2 - dd_2 m_2 + m_2 p_{12} t_{12} + p_{22} t_{22} - m_2 p_{22} t_{22}) \right. \\
& \quad \left. (dd_2 + dd_1 m_2 - dd_2 m_2 - m_2 t_{12} + m_2 p_{12} t_{12} - t_{22} + m_2 t_{22} + p_{22} t_{22} - m_2 p_{22} t_{22}) \right. \\
& \quad \left. (1 + \alpha_2) \right) / (1 + t_{22} \alpha_2 + s_2 t_{22} (1 + \alpha_2) + m_2 (t_{12} - t_{22}) (s_2 + \alpha_2 + s_2 \alpha_2)) + \\
& \left( r (1 + s_2) (dd_2 + dd_1 m_2 - dd_2 m_2 - m_2 p_{12} - p_{22} + m_2 p_{22} + m_2 p_{12} t_{12} + \right. \\
& \quad \left. p_{22} t_{22} - m_2 p_{22} t_{22}) (dd_2 + dd_1 m_2 - dd_2 m_2 - m_2 t_{12} + \right. \\
& \quad \left. m_2 p_{12} t_{12} - t_{22} + m_2 t_{22} + p_{22} t_{22} - m_2 p_{22} t_{22}) (1 + \alpha_2) \right) / \\
& \left. (1 + t_{22} \alpha_2 + s_2 t_{22} (1 + \alpha_2) + m_2 (t_{12} - t_{22}) (s_2 + \alpha_2 + s_2 \alpha_2)) \right) \};
\end{aligned}$$

```

itgenmale[.1, .2, 3, 3.5, .1, .1, .5][{.8, .5, .05, .6, .9, .04}]
{0.792781, 0.615953, 0.0469744, 0.618342, 0.854094, 0.037247}

```

## ■ 2. Analysis

## 2.1 Equilibria with fixation of one allele

### 2.1.1 Determination of equilibria

Assume  $dd1 = dd2 = 0$  and  $p12 = p22$

We show that the only possible equilibria are  $t12 = t22 = 0$  and  $t12 = t22 = 1$  (Determining all equilibria with  $dd1 = dd2 = 0$  seems impossible)

Factor  $\left[ \text{itgenmale}[s1, s2, \alpha1, \alpha2, m1, m2, r][\{p12, t12, dd1, p22, t22, dd2\}] / \right.$   
 $\left. \{dd1 \rightarrow 0, p22 \rightarrow p12, dd2 \rightarrow 0\} - \{p12, t12, 0, p12, t22, 0\} \right]$

$\{0,$

$$\begin{aligned}
 & - \left( (2 m1 t12 + s1 t12 + 3 m1 s1 t12 + s1^2 t12 + m1 s1^2 t12 - s1 t12^2 - 2 m1 s1 t12^2 + 3 m1^2 s1 t12^2 - 2 \right. \\
 & \quad s1^2 t12^2 + 2 m1^2 s1^2 t12^2 + s1^2 t12^3 - m1 s1^2 t12^3 - m1^2 s1^2 t12^3 + m1^3 s1^2 t12^3 - 2 m1 t22 - \\
 & \quad 3 m1 s1 t22 - m1 s1^2 t22 + 2 m1 s1 t12 t22 - 6 m1^2 s1 t12 t22 - 4 m1^2 s1^2 t12 t22 + \\
 & \quad m1 s1^2 t12^2 t22 + 2 m1^2 s1^2 t12^2 t22 - 3 m1^3 s1^2 t12^2 t22 + 3 m1^2 s1 t22^2 + 2 m1^2 s1^2 t22^2 - \\
 & \quad m1^2 s1^2 t12 t22^2 + 3 m1^3 s1^2 t12 t22^2 - m1^3 s1^2 t22^3 + t12 \alpha1 + m1 t12 \alpha1 - p12 t12 \alpha1 + \\
 & \quad m1 p12 t12 \alpha1 + 2 s1 t12 \alpha1 + 2 m1 s1 t12 \alpha1 - p12 s1 t12 \alpha1 + m1 p12 s1 t12 \alpha1 + \\
 & \quad s1^2 t12 \alpha1 + m1 s1^2 t12 \alpha1 - t12^2 \alpha1 + m1^2 t12^2 \alpha1 + p12 t12^2 \alpha1 - 2 m1 p12 t12^2 \alpha1 + \\
 & \quad m1^2 p12 t12^2 \alpha1 - 3 s1 t12^2 \alpha1 + 3 m1^2 s1 t12^2 \alpha1 + p12 s1 t12^2 \alpha1 - 2 m1 p12 s1 t12^2 \alpha1 + \\
 & \quad m1^2 p12 s1 t12^2 \alpha1 - 2 s1^2 t12^2 \alpha1 + 2 m1^2 s1^2 t12^2 \alpha1 + s1 t12^3 \alpha1 - m1 s1 t12^3 \alpha1 - \\
 & \quad m1^2 s1 t12^3 \alpha1 + m1^3 s1 t12^3 \alpha1 + s1^2 t12^3 \alpha1 - m1 s1^2 t12^3 \alpha1 - m1^2 s1^2 t12^3 \alpha1 + \\
 & \quad m1^3 s1^2 t12^3 \alpha1 - m1 t22 \alpha1 - m1 p12 t22 \alpha1 - 2 m1 s1 t22 \alpha1 - m1 p12 s1 t22 \alpha1 - \\
 & \quad m1 s1^2 t22 \alpha1 - 2 m1^2 t12 t22 \alpha1 + 2 m1 p12 t12 t22 \alpha1 - 2 m1^2 p12 t12 t22 \alpha1 - \\
 & \quad 6 m1^2 s1 t12 t22 \alpha1 + 2 m1 p12 s1 t12 t22 \alpha1 - 2 m1^2 p12 s1 t12 t22 \alpha1 - 4 m1^2 s1^2 t12 t22 \alpha1 + \\
 & \quad m1 s1 t12^2 t22 \alpha1 + 2 m1^2 s1 t12^2 t22 \alpha1 - 3 m1^3 s1 t12^2 t22 \alpha1 + m1 s1^2 t12^2 t22 \alpha1 + \\
 & \quad 2 m1^2 s1^2 t12^2 t22 \alpha1 - 3 m1^3 s1^2 t12^2 t22 \alpha1 + m1^2 t22^2 \alpha1 + m1^2 p12 t22^2 \alpha1 + \\
 & \quad 3 m1^2 s1 t22^2 \alpha1 + m1^2 p12 s1 t22^2 \alpha1 + 2 m1^2 s1^2 t22^2 \alpha1 - m1^2 s1 t12 t22^2 \alpha1 + \\
 & \quad 3 m1^3 s1 t12 t22^2 \alpha1 - m1^2 s1^2 t12 t22^2 \alpha1 + 3 m1^3 s1^2 t12 t22^2 \alpha1 - m1^3 s1 t22^3 \alpha1 - \\
 & \quad m1^3 s1^2 t22^3 \alpha1 - p12 t12 \alpha2 + m1 p12 t12 \alpha2 - p12 s1 t12 \alpha2 + m1 p12 s1 t12 \alpha2 + \\
 & \quad 2 m1 t12^2 \alpha2 - 2 m1^2 t12^2 \alpha2 + p12 t12^2 \alpha2 - 2 m1 p12 t12^2 \alpha2 + m1^2 p12 t12^2 \alpha2 + s1 t12^2 \alpha2 - \\
 & \quad m1^2 s1 t12^2 \alpha2 + p12 s1 t12^2 \alpha2 - 2 m1 p12 s1 t12^2 \alpha2 + m1^2 p12 s1 t12^2 \alpha2 - s1 t12^3 \alpha2 + \\
 & \quad m1 s1 t12^3 \alpha2 + m1^2 s1 t12^3 \alpha2 - m1^3 s1 t12^3 \alpha2 - m1 p12 t22 \alpha2 - m1 p12 s1 t22 \alpha2 - \\
 & \quad 2 m1 t12 t22 \alpha2 + 4 m1^2 t12 t22 \alpha2 + 2 m1 p12 t12 t22 \alpha2 - 2 m1^2 p12 t12 t22 \alpha2 + \\
 & \quad 2 m1^2 s1 t12 t22 \alpha2 + 2 m1 p12 s1 t12 t22 \alpha2 - 2 m1^2 p12 s1 t12 t22 \alpha2 - m1 s1 t12^2 t22 \alpha2 - \\
 & \quad 2 m1^2 s1 t12^2 t22 \alpha2 + 3 m1^3 s1 t12^2 t22 \alpha2 - 2 m1^2 t22^2 \alpha2 + m1^2 p12 t22^2 \alpha2 - \\
 & \quad m1^2 s1 t22^2 \alpha2 + m1^2 p12 s1 t22^2 \alpha2 + m1^2 s1 t12 t22^2 \alpha2 - 3 m1^3 s1 t12 t22^2 \alpha2 + \\
 & \quad m1^3 s1 t22^3 \alpha2 - p12 t12 \alpha1 \alpha2 + m1 p12 t12 \alpha1 \alpha2 - p12 s1 t12 \alpha1 \alpha2 + m1 p12 s1 t12 \alpha1 \alpha2 + \\
 & \quad t12^2 \alpha1 \alpha2 - m1^2 t12^2 \alpha1 \alpha2 + p12 t12^2 \alpha1 \alpha2 - 2 m1 p12 t12^2 \alpha1 \alpha2 + m1^2 p12 t12^2 \alpha1 \alpha2 + \\
 & \quad s1 t12^2 \alpha1 \alpha2 - m1^2 s1 t12^2 \alpha1 \alpha2 + p12 s1 t12^2 \alpha1 \alpha2 - 2 m1 p12 s1 t12^2 \alpha1 \alpha2 + \\
 & \quad m1^2 p12 s1 t12^2 \alpha1 \alpha2 - t12^3 \alpha1 \alpha2 + m1 t12^3 \alpha1 \alpha2 + m1^2 t12^3 \alpha1 \alpha2 - m1^3 t12^3 \alpha1 \alpha2 - \\
 & \quad s1 t12^3 \alpha1 \alpha2 + m1 s1 t12^3 \alpha1 \alpha2 + m1^2 s1 t12^3 \alpha1 \alpha2 - m1^3 s1 t12^3 \alpha1 \alpha2 - m1 p12 t22 \alpha1 \alpha2 - \\
 & \quad m1 p12 s1 t22 \alpha1 \alpha2 + 2 m1^2 t12 t22 \alpha1 \alpha2 + 2 m1 p12 t12 t22 \alpha1 \alpha2 - 2 m1^2 p12 t12 t22 \alpha1 \alpha2 + \\
 & \quad 2 m1^2 s1 t12 t22 \alpha1 \alpha2 + 2 m1 p12 s1 t12 t22 \alpha1 \alpha2 - 2 m1^2 p12 s1 t12 t22 \alpha1 \alpha2 - \\
 & \quad m1 t12^2 t22 \alpha1 \alpha2 - 2 m1^2 t12^2 t22 \alpha1 \alpha2 + 3 m1^3 t12^2 t22 \alpha1 \alpha2 - m1 s1 t12^2 t22 \alpha1 \alpha2 - \\
 & \quad 2 m1^2 s1 t12^2 t22 \alpha1 \alpha2 + 3 m1^3 s1 t12^2 t22 \alpha1 \alpha2 - m1^2 t22^2 \alpha1 \alpha2 + m1^2 p12 t22^2 \alpha1 \alpha2 - \\
 & \quad m1^2 s1 t22^2 \alpha1 \alpha2 + m1^2 p12 s1 t22^2 \alpha1 \alpha2 + m1^2 t12 t22^2 \alpha1 \alpha2 - 3 m1^3 t12 t22^2 \alpha1 \alpha2 + \\
 & \quad m1^2 s1 t12 t22^2 \alpha1 \alpha2 - 3 m1^3 s1 t12 t22^2 \alpha1 \alpha2 + m1^3 t22^3 \alpha1 \alpha2 + m1^3 s1 t22^3 \alpha1 \alpha2) / \\
 & \left. (2 (1 + s1 - s1 t12 + m1 s1 t12 - m1 s1 t22 + \alpha1 + s1 \alpha1 - t12 \alpha1 + m1 t12 \alpha1 - \right. \\
 & \quad \left. s1 t12 \alpha1 + m1 s1 t12 \alpha1 - m1 t22 \alpha1 - m1 s1 t22 \alpha1) \right)
 \end{aligned}$$

$$\begin{aligned}
& \left( (1 + s1 - s1 t12 + m1 s1 t12 - m1 s1 t22 + t12 \alpha 2 - m1 t12 \alpha 2 + m1 t22 \alpha 2) \right) \Big), \\
& \left( (-1 + p12) p12 r (1 + s1) (-t12 + m1 t12 - m1 t22) (1 - t12 + m1 t12 - m1 t22) \right. \\
& \quad \left. (\alpha 1 + \alpha 2 + \alpha 1 \alpha 2) \right) / \\
& \left( 2 (1 + s1 - s1 t12 + m1 s1 t12 - m1 s1 t22 + \alpha 1 + s1 \alpha 1 - t12 \alpha 1 + m1 t12 \alpha 1 - \right. \\
& \quad \left. s1 t12 \alpha 1 + m1 s1 t12 \alpha 1 - m1 t22 \alpha 1 - m1 s1 t22 \alpha 1) \right. \\
& \quad \left. (1 + s1 - s1 t12 + m1 s1 t12 - m1 s1 t22 + t12 \alpha 2 - m1 t12 \alpha 2 + m1 t22 \alpha 2) \right) \Big), 0, \\
& - \left( (-2 m2 t12 - m2 s2 t12 - 3 m2^2 s2 t12^2 - m2^2 s2^2 t12^2 - m2^3 s2^2 t12^3 + 2 m2 t22 - s2 t22 + \right. \\
& \quad m2 s2 t22 - 2 m2 s2 t12 t22 + 6 m2^2 s2 t12 t22 - 2 m2 s2^2 t12 t22 + 2 m2^2 s2^2 t12 t22 - \\
& \quad m2^2 s2^2 t12^2 t22 + 3 m2^3 s2^2 t12^2 t22 + s2 t22^2 + 2 m2 s2 t22^2 - 3 m2^2 s2 t22^2 - s2^2 t22^2 + \\
& \quad 2 m2 s2^2 t22^2 - m2^2 s2^2 t22^2 + m2 s2^2 t12 t22^2 + 2 m2^2 s2^2 t12 t22^2 - 3 m2^3 s2^2 t12 t22^2 + \\
& \quad s2^2 t22^3 - m2 s2^2 t22^3 - m2^2 s2^2 t22^3 + m2^3 s2^2 t22^3 - m2 t12 \alpha 1 - m2 p12 t12 \alpha 1 - \\
& \quad m2 p12 s2 t12 \alpha 1 + m2^2 t12^2 \alpha 1 + m2^2 p12 t12^2 \alpha 1 - m2^2 s2 t12^2 \alpha 1 + m2^2 p12 s2 t12^2 \alpha 1 + \\
& \quad m2^3 s2 t12^3 \alpha 1 + t22 \alpha 1 + m2 t22 \alpha 1 - p12 t22 \alpha 1 + m2 p12 t22 \alpha 1 - p12 s2 t22 \alpha 1 + \\
& \quad m2 p12 s2 t22 \alpha 1 - 2 m2^2 t12 t22 \alpha 1 + 2 m2 p12 t12 t22 \alpha 1 - 2 m2^2 p12 t12 t22 \alpha 1 + \\
& \quad 2 m2^2 s2 t12 t22 \alpha 1 + 2 m2 p12 s2 t12 t22 \alpha 1 - 2 m2^2 p12 s2 t12 t22 \alpha 1 + m2^2 s2 t12^2 t22 \alpha 1 - \\
& \quad 3 m2^3 s2 t12^2 t22 \alpha 1 - t22^2 \alpha 1 + m2^2 t22^2 \alpha 1 + p12 t22^2 \alpha 1 - 2 m2 p12 t22^2 \alpha 1 + m2^2 p12 t22^2 \alpha 1 + \\
& \quad s2 t22^2 \alpha 1 - m2^2 s2 t22^2 \alpha 1 + p12 s2 t22^2 \alpha 1 - 2 m2 p12 s2 t22^2 \alpha 1 + m2^2 p12 s2 t22^2 \alpha 1 - \\
& \quad m2 s2 t12 t22^2 \alpha 1 - 2 m2^2 s2 t12 t22^2 \alpha 1 + 3 m2^3 s2 t12 t22^2 \alpha 1 - s2 t22^3 \alpha 1 + m2 s2 t22^3 \alpha 1 + \\
& \quad m2^2 s2 t22^3 \alpha 1 - m2^3 s2 t22^3 \alpha 1 - m2 p12 t12 \alpha 2 - m2 p12 s2 t12 \alpha 2 - 2 m2^2 t12^2 \alpha 2 + \\
& \quad m2^2 p12 t12^2 \alpha 2 - 3 m2^2 s2 t12^2 \alpha 2 + m2^2 p12 s2 t12^2 \alpha 2 - m2^2 s2^2 t12^2 \alpha 2 - m2^3 s2 t12^3 \alpha 2 - \\
& \quad m2^3 s2^2 t12^3 \alpha 2 - p12 t22 \alpha 2 + m2 p12 t22 \alpha 2 - p12 s2 t22 \alpha 2 + m2 p12 s2 t22 \alpha 2 - \\
& \quad 2 m2 t12 t22 \alpha 2 + 4 m2^2 t12 t22 \alpha 2 + 2 m2 p12 t12 t22 \alpha 2 - 2 m2^2 p12 t12 t22 \alpha 2 - \\
& \quad 4 m2 s2 t12 t22 \alpha 2 + 6 m2^2 s2 t12 t22 \alpha 2 + 2 m2 p12 s2 t12 t22 \alpha 2 - 2 m2^2 p12 s2 t12 t22 \alpha 2 - \\
& \quad 2 m2 s2^2 t12 t22 \alpha 2 + 2 m2^2 s2^2 t12 t22 \alpha 2 - m2^2 s2 t12^2 t22 \alpha 2 + 3 m2^3 s2 t12^2 t22 \alpha 2 - \\
& \quad m2^2 s2^2 t12^2 t22 \alpha 2 + 3 m2^3 s2^2 t12^2 t22 \alpha 2 + 2 m2 t22^2 \alpha 2 - 2 m2^2 t22^2 \alpha 2 + p12 t22^2 \alpha 2 - \\
& \quad 2 m2 p12 t22^2 \alpha 2 + m2^2 p12 t22^2 \alpha 2 - s2 t22^2 \alpha 2 + 4 m2 s2 t22^2 \alpha 2 - 3 m2^2 s2 t22^2 \alpha 2 + \\
& \quad p12 s2 t22^2 \alpha 2 - 2 m2 p12 s2 t22^2 \alpha 2 + m2^2 p12 s2 t22^2 \alpha 2 - s2^2 t22^2 \alpha 2 + 2 m2 s2^2 t22^2 \alpha 2 - \\
& \quad m2^2 s2^2 t22^2 \alpha 2 + m2 s2 t12 t22^2 \alpha 2 + 2 m2^2 s2 t12 t22^2 \alpha 2 - 3 m2^3 s2 t12 t22^2 \alpha 2 + \\
& \quad m2 s2^2 t12 t22^2 \alpha 2 + 2 m2^2 s2^2 t12 t22^2 \alpha 2 - 3 m2^3 s2^2 t12 t22^2 \alpha 2 + s2 t22^3 \alpha 2 - m2 s2 t22^3 \alpha 2 - \\
& \quad m2^2 s2 t22^3 \alpha 2 + m2^3 s2 t22^3 \alpha 2 + s2^2 t22^3 \alpha 2 - m2 s2^2 t22^3 \alpha 2 - m2^2 s2^2 t22^3 \alpha 2 + \\
& \quad m2^3 s2^2 t22^3 \alpha 2 - m2 p12 t12 \alpha 1 \alpha 2 - m2 p12 s2 t12 \alpha 1 \alpha 2 - m2^2 t12^2 \alpha 1 \alpha 2 + m2^2 p12 t12^2 \alpha 1 \alpha 2 - \\
& \quad m2^2 s2 t12^2 \alpha 1 \alpha 2 + m2^2 p12 s2 t12^2 \alpha 1 \alpha 2 + m2^3 t12^3 \alpha 1 \alpha 2 + m2^3 s2 t12^3 \alpha 1 \alpha 2 - p12 t22 \alpha 1 \alpha 2 + \\
& \quad m2 p12 t22 \alpha 1 \alpha 2 - p12 s2 t22 \alpha 1 \alpha 2 + m2 p12 s2 t22 \alpha 1 \alpha 2 + 2 m2^2 t12 t22 \alpha 1 \alpha 2 + \\
& \quad 2 m2 p12 t12 t22 \alpha 1 \alpha 2 - 2 m2^2 p12 t12 t22 \alpha 1 \alpha 2 + 2 m2^2 s2 t12 t22 \alpha 1 \alpha 2 + \\
& \quad 2 m2 p12 s2 t12 t22 \alpha 1 \alpha 2 - 2 m2^2 p12 s2 t12 t22 \alpha 1 \alpha 2 + m2^2 t12^2 t22 \alpha 1 \alpha 2 - \\
& \quad 3 m2^3 t12^2 t22 \alpha 1 \alpha 2 + m2^2 s2 t12^2 t22 \alpha 1 \alpha 2 - 3 m2^3 s2 t12^2 t22 \alpha 1 \alpha 2 + t22^2 \alpha 1 \alpha 2 - \\
& \quad m2^2 t22^2 \alpha 1 \alpha 2 + p12 t22^2 \alpha 1 \alpha 2 - 2 m2 p12 t22^2 \alpha 1 \alpha 2 + m2^2 p12 t22^2 \alpha 1 \alpha 2 + s2 t22^2 \alpha 1 \alpha 2 - \\
& \quad m2^2 s2 t22^2 \alpha 1 \alpha 2 + p12 s2 t22^2 \alpha 1 \alpha 2 - 2 m2 p12 s2 t22^2 \alpha 1 \alpha 2 + m2^2 p12 s2 t22^2 \alpha 1 \alpha 2 - \\
& \quad m2 t12 t22^2 \alpha 1 \alpha 2 - 2 m2^2 t12 t22^2 \alpha 1 \alpha 2 + 3 m2^3 t12 t22^2 \alpha 1 \alpha 2 - m2 s2 t12 t22^2 \alpha 1 \alpha 2 - \\
& \quad 2 m2^2 s2 t12 t22^2 \alpha 1 \alpha 2 + 3 m2^3 s2 t12 t22^2 \alpha 1 \alpha 2 - t22^3 \alpha 1 \alpha 2 + m2 t22^3 \alpha 1 \alpha 2 + m2^2 t22^3 \alpha 1 \alpha 2 - \\
& \quad m2^3 t22^3 \alpha 1 \alpha 2 - s2 t22^3 \alpha 1 \alpha 2 + m2 s2 t22^3 \alpha 1 \alpha 2 + m2^2 s2 t22^3 \alpha 1 \alpha 2 - m2^3 s2 t22^3 \alpha 1 \alpha 2) / \\
& \left( 2 (-1 - m2 s2 t12 - s2 t22 + m2 s2 t22 - \alpha 1 + m2 t12 \alpha 1 + t22 \alpha 1 - m2 t22 \alpha 1) \right. \\
& \quad \left. (-1 - m2 s2 t12 - s2 t22 + m2 s2 t22 - m2 t12 \alpha 2 - \right. \\
& \quad \left. m2 s2 t12 \alpha 2 - t22 \alpha 2 + m2 t22 \alpha 2 - s2 t22 \alpha 2 + m2 s2 t22 \alpha 2) \right) \Big), \\
& \left( (-1 + p12) p12 r (1 + s2) (-1 + m2 t12 + t22 - m2 t22) (m2 t12 + t22 - m2 t22) \right. \\
& \quad \left. (\alpha 1 + \alpha 2 + \alpha 1 \alpha 2) \right) / \\
& \left( 2 (1 + m2 s2 t12 + s2 t22 - m2 s2 t22 + \alpha 1 - m2 t12 \alpha 1 - t22 \alpha 1 + m2 t22 \alpha 1) \right. \\
& \quad \left. (1 + m2 s2 t12 + s2 t22 - m2 s2 t22 + m2 t12 \alpha 2 + \right. \\
& \quad \left. m2 s2 t12 \alpha 2 + t22 \alpha 2 - m2 t22 \alpha 2 + s2 t22 \alpha 2 - m2 s2 t22 \alpha 2) \right) \Big) \Big\}
\end{aligned}$$

Simplify[Solve[{{(-1 + p12) p12 r (1 + s1) (-t12 + m1 t12 - m1 t22) (1 - t12 + m1 t12 - m1 t22) (\alpha 1 + \alpha 2 + \alpha 1 \alpha 2)}, {(-1 + p12) p12 r (1 + s2) (-1 + m2 t12 + t22 - m2 t22) (m2 t12 + t22 - m2 t22) (\alpha 1 + \alpha 2 + \alpha 1 \alpha 2)}}] == 0, {t12, t22}]]

$$\left\{ \{t_{12} \rightarrow 0, t_{22} \rightarrow 0\}, \{t_{12} \rightarrow 1, t_{22} \rightarrow 1\}, \left\{ t_{12} \rightarrow \frac{m_1}{-1 + m_1 + m_2}, t_{22} \rightarrow \frac{-1 + m_1}{-1 + m_1 + m_2} \right\}, \left\{ t_{12} \rightarrow \frac{-1 + m_2}{-1 + m_1 + m_2}, t_{22} \rightarrow \frac{m_2}{-1 + m_1 + m_2} \right\} \right\}$$

If  $0 < p_{12} < 1$ , the only admissible solutions are  $\{t_{12} \rightarrow 0, t_{22} \rightarrow 0\}, \{t_{12} \rightarrow 1, t_{22} \rightarrow 1\}$ .

Assume  $p_{12} = p_{22} = 0$

`FullSimplify[(itgenmale[s1, s2, α1, α2, m1, m2, r][{p12, t12, dd1, p22, t22, dd2}] /.  
{p12 → 0, dd1 → 0, p22 → 0, dd2 → 0}) - {0, t12, 0, 0, t22, 0}]`

$$\left\{ 0, \frac{1}{2} \left( -t_{12} - m_1 t_{12} + m_1 t_{22} + (t_{12} - m_1 t_{12} + m_1 t_{22}) / \left( (1 + \alpha_1 + (-1 + m_1) t_{12} \alpha_1 - m_1 t_{22} \alpha_1 + s_1 (1 + (-1 + m_1) t_{12} - m_1 t_{22}) (1 + \alpha_1)) \right) \right), 0, 0, \right. \\ \left. \left( m_2^2 (t_{12} - t_{22})^2 (s_2 - \alpha_1) - (-1 + t_{22}) t_{22} (s_2 - \alpha_1) + m_2 (t_{12} - t_{22}) (2 + s_2 + \alpha_1) \right) / \right. \\ \left. (2 (1 + (m_2 (t_{12} - t_{22}) + t_{22}) (s_2 - \alpha_1) + \alpha_1)), 0 \right\}$$

$$\text{FullSimplify[Numerator[Factor[-t12 - m1 t12 + m1 t22 + (t12 - m1 t12 + m1 t22) /} \\ (1 + \alpha_1 + (-1 + m_1) t_{12} \alpha_1 - m_1 t_{22} \alpha_1 + s_1 (1 + (-1 + m_1) t_{12} - m_1 t_{22}) (1 + \alpha_1))] ] \\ (-1 + t_{12}) t_{12} (s_1 + \alpha_1 + s_1 \alpha_1) - \\ m_1^2 (t_{12} - t_{22})^2 (s_1 + \alpha_1 + s_1 \alpha_1) - m_1 (t_{12} - t_{22}) (2 + s_1 + \alpha_1 + s_1 \alpha_1)]$$

The first term is negative. Therefore, the above expression can be 0 only if the sum of the second and third is negative.

check when it is 0:

$$\text{Simplify[} \\ \text{Solve}[m_1^2 (t_{12} - t_{22})^2 (s_1 + \alpha_1 + s_1 \alpha_1) + m_1 (t_{12} - t_{22}) (2 + s_1 + \alpha_1 + s_1 \alpha_1) == 0, t_{22}] ] \\ \{ \{t_{22} \rightarrow t_{12}\}, \{t_{22} \rightarrow (2 + \alpha_1 + m_1 t_{12} \alpha_1 + s_1 (1 + m_1 t_{12}) (1 + \alpha_1)) / (m_1 (s_1 + \alpha_1 + s_1 \alpha_1))\} \}$$

Therefore the smallest value of  $t_{22}$  (from the second solution) occurs if  $t_{12} = 0$ :

$$\text{Simplify}[(2 + \alpha_1 + m_1 t_{12} \alpha_1 + s_1 (1 + m_1 t_{12}) (1 + \alpha_1)) / (m_1 (s_1 + \alpha_1 + s_1 \alpha_1))] /. t_{12} \rightarrow 0 \\ \frac{2 + s_1 + \alpha_1 + s_1 \alpha_1}{m_1 (s_1 + \alpha_1 + s_1 \alpha_1)}$$

This exceeds 1 for all reasonable migration rates, in particular if  $m_1 > 1$ . Therefore, no solution other than  $\{t_{12} \rightarrow 0, t_{22} \rightarrow 0\}$  or  $\{t_{12} \rightarrow 1, t_{22} \rightarrow 1\}$  is possible.

Assume  $t_{12} = t_{22} = 0$  (loss of trait allele T2)

$$\text{Factor}[(itgenmale[s1, s2, α1, α2, m1, m2, r][{p12, t12, dd1, p22, t22, dd2}] /. \\ \{t_{12} \rightarrow 0, dd1 \rightarrow 0, t_{22} \rightarrow 0, dd2 \rightarrow 0\}) - \{p_{12}, 0, 0, p_{22}, 0, 0\}] \\ \{-m_1 (p_{12} - p_{22}), 0, 0, -m_2 (-p_{12} + p_{22}), 0, 0\}$$

Therefore, as expected  $p_{12} = p_{22}$  holds at these equilibria

Assume  $t_{l2} = t_{22} = 1$

```
Factor[ (itgenmale[s1, s2, α1, α2, m1, m2, r] [{p12, t12, dd1, p22, t22, dd2}] /.
  {t12 → 1, dd1 → 0, t22 → 1, dd2 → 0}) - {p12, 1, 0, p22, 1, 0} ]
{-m1 (p12 - p22), 0, 0, -m2 (-p12 + p22), 0, 0}
```

Therefore,  $p_{12} = p_{22}$  holds at these equilibria

## 2.1.2 Jacobians and stability of equilibria, where one trait allele is fixed

Stability of equilibria at the edge  $t_{l2} = t_{22} = 0$

JacoT20 =

```
Simplify[D[itgenmale[s1, s2, α1, α2, m1, m2, r] [{p12, t12, dd1, p22, t22, dd2}],
  {{p12, t12, dd1, p22, t22, dd2}}] /. {t12 → 0, dd1 → 0, t22 → 0, dd2 → 0, p12 → p22}]
```

```
{ {1 - m1, 0, ((-1 + m1) (s1 (1 + α1) - p22 α2 - α1 (-1 + p22 + p22 α2))) / (2 (1 + s1) (1 + α1)),
  m1, 0, (m1 (-s1 (1 + α1) + p22 α2 + α1 (-1 + p22 + p22 α2))) / (2 (1 + s1) (1 + α1)) },
  {0, -(((-1 + m1) (2 + s1 + α1 + p22 α1 + s1 α1 + p22 α2 + p22 α1 α2))) / (2 (1 + s1) (1 + α1))),
  0, 0, (m1 (2 + s1 + α1 + p22 α1 + s1 α1 + p22 α2 + p22 α1 α2)) / (2 (1 + s1) (1 + α1)), 0 },
  {0, ((-1 + m1) (-1 + p22) p22 r (α1 + α2 + α1 α2)) / (2 (1 + s1) (1 + α1)),
  ((-1 + m1) (-1 + r) (2 + s1 + α1 + p22 α1 + s1 α1 + p22 α2 + p22 α1 α2)) / (2 (1 + s1) (1 + α1)),
  0, -((m1 (-1 + p22) p22 r (α1 + α2 + α1 α2)) / (2 (1 + s1) (1 + α1))),
  -((m1 (-1 + r) (2 + s1 + α1 + p22 α1 + s1 α1 + p22 α2 + p22 α1 α2)) / (2 (1 + s1) (1 + α1))) },
  {m2, 0, (m2 (s2 + p22 α2 + α1 (-1 + p22 + p22 α2) + p22 s2 (α1 + α2 + α1 α2))) / (2 (1 + α1)),
  1 - m2, 0,
  -(((-1 + m2) (s2 + p22 α2 + α1 (-1 + p22 + p22 α2) + p22 s2 (α1 + α2 + α1 α2))) / (2 (1 + α1))) },
  {0, (m2 (2 + s2 + p22 α2 + α1 (1 + p22 + p22 α2) + p22 s2 (α1 + α2 + α1 α2))) / (2 (1 + α1)),
  0, 0, -(((-1 + m2) (2 + s2 + p22 α2 + α1 (1 + p22 + p22 α2) + p22 s2 (α1 + α2 + α1 α2))) /
    (2 (1 + α1))), 0 }, {0, -((m2 (-1 + p22) p22 r (1 + s2) (α1 + α2 + α1 α2)) / (2 (1 + α1))),
  -((m2 (-1 + r) (2 + s2 + p22 α2 + α1 (1 + p22 + p22 α2) + p22 s2 (α1 + α2 + α1 α2))) /
    (2 (1 + α1))), 0, ((-1 + m2) (-1 + p22) p22 r (1 + s2) (α1 + α2 + α1 α2)) / (2 (1 + α1)),
  ((-1 + m2) (-1 + r) (2 + s2 + p22 α2 + α1 (1 + p22 + p22 α2) + p22 s2 (α1 + α2 + α1 α2))) /
    (2 (1 + α1)) } }
```

Characteristic polynomial at this equilibrium:



**cpolT20 = Simplify[Det[JacoT20 - x IdentityMatrix[6]]]**

$$\frac{1}{16 (1 + s1)^2 (1 + \alpha1)^4} \left( (-1 + x) (-1 + m1 + m2 + x) (-m1 m2 (2 + s1 + \alpha1 + p22 \alpha1 + s1 \alpha1 + p22 \alpha2 + p22 \alpha1 \alpha2) \right. \\ (2 + s2 + p22 \alpha2 + \alpha1 (1 + p22 + p22 \alpha2) + p22 s2 (\alpha1 + \alpha2 + \alpha1 \alpha2)) + \\ (-2 + 2x - \alpha1 - p22 \alpha1 + 2x \alpha1 + s1 (-1 + 2x) (1 + \alpha1) - p22 \alpha2 - \\ p22 \alpha1 \alpha2 + m1 (2 + s1 + \alpha1 + p22 \alpha1 + s1 \alpha1 + p22 \alpha2 + p22 \alpha1 \alpha2)) \\ (-2 + 2x - \alpha1 - p22 \alpha1 + 2x \alpha1 - p22 \alpha2 - p22 \alpha1 \alpha2 - s2 (1 + p22 (\alpha1 + \alpha2 + \alpha1 \alpha2)) + \\ m2 (2 + s2 + p22 \alpha2 + \alpha1 (1 + p22 + p22 \alpha2) + p22 s2 (\alpha1 + \alpha2 + \alpha1 \alpha2))) \\ \left. (-m1 m2 (-1 + r)^2 (2 + s1 + \alpha1 + p22 \alpha1 + s1 \alpha1 + p22 \alpha2 + p22 \alpha1 \alpha2) \right. \\ (2 + s2 + p22 \alpha2 + \alpha1 (1 + p22 + p22 \alpha2) + p22 s2 (\alpha1 + \alpha2 + \alpha1 \alpha2)) + \\ (2 + s1 - 2x - 2s1 x + \alpha1 + p22 \alpha1 + s1 \alpha1 - 2x \alpha1 - 2s1 x \alpha1 + p22 \alpha2 + \\ p22 \alpha1 \alpha2 + m1 (-1 + r) (2 + s1 + \alpha1 + p22 \alpha1 + s1 \alpha1 + p22 \alpha2 + p22 \alpha1 \alpha2) - \\ r (2 + s1 + \alpha1 + p22 \alpha1 + s1 \alpha1 + p22 \alpha2 + p22 \alpha1 \alpha2)) \\ (2 + s2 - 2x + \alpha1 + p22 \alpha1 + p22 s2 \alpha1 - 2x \alpha1 + p22 \alpha2 + p22 s2 \alpha2 + p22 \alpha1 \alpha2 + p22 s2 \alpha1 \alpha2 + \\ m2 (-1 + r) (2 + s2 + p22 \alpha2 + \alpha1 (1 + p22 + p22 \alpha2) + p22 s2 (\alpha1 + \alpha2 + \alpha1 \alpha2))) - \\ \left. r (2 + s2 + p22 \alpha2 + \alpha1 (1 + p22 + p22 \alpha2) + p22 s2 (\alpha1 + \alpha2 + \alpha1 \alpha2)) \right)$$

There are four factors;  $x = 1$  and  $x = 1 - m1 - m2$  are always eigenvalues.

In addition, there is one factor without  $r$ , and one factor with  $r$ . Both factors are quadratic in  $x$  and given below:

$$\text{cpolT20noR}[x\_ , p22\_ ] := (-m1 m2 (2 + s1 + \alpha1 + p22 \alpha1 + s1 \alpha1 + p22 \alpha2 + p22 \alpha1 \alpha2) \\ (2 + p22 \alpha2 + \alpha1 (1 + p22 + p22 \alpha2) + s2 (1 + p22 (\alpha1 + \alpha2 + \alpha1 \alpha2))) + \\ (-2 + 2x - \alpha1 - p22 \alpha1 + 2x \alpha1 + s1 (-1 + 2x) (1 + \alpha1) - p22 \alpha2 - \\ p22 \alpha1 \alpha2 + m1 (2 + s1 + \alpha1 + p22 \alpha1 + s1 \alpha1 + p22 \alpha2 + p22 \alpha1 \alpha2)) \\ (-2 + 2x - \alpha1 - p22 \alpha1 + 2x \alpha1 - p22 \alpha2 - p22 \alpha1 \alpha2 - s2 (1 + p22 (\alpha1 + \alpha2 + \alpha1 \alpha2))) + \\ m2 (2 + s2 + p22 \alpha2 + \alpha1 (1 + p22 + p22 \alpha2) + s2 p22 (\alpha1 + \alpha2 + \alpha1 \alpha2))) ;$$

$$\text{cpolT20R}[x\_ , p22\_ ] := (-m1 m2 (-1 + r)^2 (2 + s1 + \alpha1 + p22 \alpha1 + s1 \alpha1 + p22 \alpha2 + p22 \alpha1 \alpha2) \\ (2 + p22 \alpha2 + \alpha1 (1 + p22 + p22 \alpha2) + s2 (1 + p22 (\alpha1 + \alpha2 + \alpha1 \alpha2))) + \\ (2 + s1 - 2x - 2s1 x + \alpha1 + p22 \alpha1 + s1 \alpha1 - 2x \alpha1 - 2s1 x \alpha1 + p22 \alpha2 + \\ p22 \alpha1 \alpha2 + m1 (-1 + r) (2 + s1 + \alpha1 + p22 \alpha1 + s1 \alpha1 + p22 \alpha2 + p22 \alpha1 \alpha2) - \\ r (2 + s1 + \alpha1 + p22 \alpha1 + s1 \alpha1 + p22 \alpha2 + p22 \alpha1 \alpha2)) \\ (2 + s2 - 2x + \alpha1 + p22 \alpha1 + p22 s2 \alpha1 - 2x \alpha1 + p22 \alpha2 + p22 s2 \alpha2 + p22 \alpha1 \alpha2 + p22 s2 \alpha1 \alpha2 + \\ m2 (-1 + r) (2 + p22 \alpha2 + \alpha1 (1 + p22 + p22 \alpha2) + s2 (1 + p22 (\alpha1 + \alpha2 + \alpha1 \alpha2))) - \\ r (2 + p22 \alpha2 + \alpha1 (1 + p22 + p22 \alpha2) + s2 (1 + p22 (\alpha1 + \alpha2 + \alpha1 \alpha2)))) ;$$

**Simplify[Series[cpolT20R[x, p22], {x, 0, 3}]]**

$$- (-1 + m1 + m2) (-1 + r)^2 (2 + s1 + \alpha1 + p22 \alpha1 + s1 \alpha1 + p22 \alpha2 + p22 \alpha1 \alpha2) \\ (2 + s2 + p22 \alpha2 + \alpha1 (1 + p22 + p22 \alpha2) + p22 s2 (\alpha1 + \alpha2 + \alpha1 \alpha2)) + \\ 2 (-1 + r) (1 + \alpha1) (- (-1 + m1) (2 + s1 + \alpha1 + p22 \alpha1 + s1 \alpha1 + p22 \alpha2 + p22 \alpha1 \alpha2) - \\ (-1 + m2) (1 + s1) (2 + s2 + p22 \alpha2 + \alpha1 (1 + p22 + p22 \alpha2) + p22 s2 (\alpha1 + \alpha2 + \alpha1 \alpha2))) \\ x + 4 (1 + s1) (1 + \alpha1)^2 x^2 + O[x]^4$$

**Simplify[Series[cpolT20noR[x, p22], {x, 0, 3}]]**

$$\begin{aligned}
 & -(-1 + m1 + m2) (2 + s1 + \alpha1 + p22 \alpha1 + s1 \alpha1 + p22 \alpha2 + p22 \alpha1 \alpha2) \\
 & (2 + s2 + p22 \alpha2 + \alpha1 (1 + p22 + p22 \alpha2) + p22 s2 (\alpha1 + \alpha2 + \alpha1 \alpha2)) + \\
 & 2 (1 + \alpha1) ((-1 + m1) (2 + s1 + \alpha1 + p22 \alpha1 + s1 \alpha1 + p22 \alpha2 + p22 \alpha1 \alpha2) + \\
 & (-1 + m2) (1 + s1) (2 + s2 + p22 \alpha2 + \alpha1 (1 + p22 + p22 \alpha2) + p22 s2 (\alpha1 + \alpha2 + \alpha1 \alpha2))) \\
 & x + 4 (1 + s1) (1 + \alpha1)^2 x^2 + O[x]^4
 \end{aligned}$$

Therefore, we find

**Simplify[cpolT20R[x (1 - r), p22] - (1 - r)^2 cpolT20noR[x, p22]]**

0

Therefore, cpolT20noR[x,p22] = 0 if and only if cpolT20R[(1-r)x,p22] = 0.

Hence, x is an eigenvalue resulting from cpolT20noR[x,p22] = 0 if and only if (1-r)x is an eigenvalue resulting from cpolT20R[x,p22] = 0.

As a consequence, an equilibrium p22 (=p12) at this edge (t12=t22=0, dd1=dd2=0) is unstable if and only if there exists an eigenvalue x>1 with cpolT20noR[x,p22] = 0.

Thus, a change of stability at this edge occurs at a point p22 if cpolT20noR[1,p22] = 0.

The curve of equilibria that connects the edges t12=t22=0 and t12=t22=1 has its endpoint at the value p22, at which the stability at this edge changes, i.e., where cpolT20noR[1,p22] = 0.

This is easily computed numerically.

## Study eigenvalues at p22 = 0

By the above, it is sufficient to study the zeroes x resulting from cpolT20noR (x, 0) = 0

**Simplify[Series[cpolT20noR[x, 0], {x, 0, 2}]]**

$$\begin{aligned}
 & -(-1 + m1 + m2) (2 + s2 + \alpha1) (2 + s1 + \alpha1 + s1 \alpha1) + 2 (1 + \alpha1) \\
 & (-4 - 3 s1 - s2 - s1 s2 - 2 \alpha1 - 2 s1 \alpha1 + m2 (1 + s1) (2 + s2 + \alpha1) + m1 (2 + s1 + \alpha1 + s1 \alpha1)) x + \\
 & 4 (1 + s1) (1 + \alpha1)^2 x^2 + O[x]^3
 \end{aligned}$$

The leading term is positive.

**Simplify[cpolT20noR[0, 0]]**

$$-(-1 + m1 + m2) (2 + s2 + \alpha1) (2 + s1 + \alpha1 + s1 \alpha1)$$

This is positive if m1 + m2 < 1, as we assume henceforth!

Therefore, there is one eigenvalue in (0,1) and one eigenvalue greater than 1 if and only if cpolT20noR[1, 0] < 0.

**Simplify[cpolT20noR[1, 0]]**

$$\begin{aligned}
 & -m1 m2 (2 + s2 + \alpha1) (2 + s1 + \alpha1 + s1 \alpha1) + \\
 & (-s2 + \alpha1 + m2 (2 + s2 + \alpha1)) (s1 + \alpha1 + s1 \alpha1 + m1 (2 + s1 + \alpha1 + s1 \alpha1))
 \end{aligned}$$

**FullSimplify[Series[cpolT20noR[1, 0], {α1, 0, 3}]]**

$$\begin{aligned} & - \left( s_1 + m_1 (2 + s_1) \right) s_2 + m_2 s_1 (2 + s_2) + \\ & \left( 2 m_1 + 2 m_2 + s_1 + m_1 s_1 + 3 m_2 s_1 - (1 + m_1 - m_2) (1 + s_1) s_2 \right) \alpha_1 + \\ & (1 + m_1 + m_2) (1 + s_1) \alpha_1^2 + O[\alpha_1]^4 \end{aligned}$$

This is negative if  $\alpha_1 = 0$  and positive if  $\alpha_1$  is sufficiently large:

**Simplify[cpolT20noR[1, 0] /. α1 → 0]**

$$- \left( s_1 + m_1 (2 + s_1) \right) s_2 + m_2 s_1 (2 + s_2)$$

The critical value  $\alpha_{1crit}$  of  $\alpha_1$  at which  $\text{cpolT20noR}[1, 0] = 0$  is the second of the following solutions:

**Simplify[Solve[cpolT20noR[1, 0] == 0, α1]]**

$$\begin{aligned} & \left\{ \alpha_1 \rightarrow \right. \\ & - \frac{1}{2 (1 + m_1 + m_2) (1 + s_1)} \left( 2 m_1 + 2 m_2 + s_1 + m_1 s_1 + 3 m_2 s_1 - s_2 - m_1 s_2 + m_2 s_2 - s_1 s_2 - m_1 s_1 s_2 + \right. \\ & \quad \left. m_2 s_1 s_2 + \sqrt{4 (1 + m_1 + m_2) (1 + s_1) \left( (s_1 + m_1 (2 + s_1)) s_2 - m_2 s_1 (2 + s_2) \right) + \right. \\ & \quad \left. (s_1 - s_2 - s_1 s_2 + m_1 (2 + s_1 - s_2 - s_1 s_2) + m_2 (2 + s_2 + s_1 (3 + s_2)))^2} \right) \left. \right\}, \\ & \left\{ \alpha_1 \rightarrow \frac{1}{2 (1 + m_1 + m_2) (1 + s_1)} \left( -2 m_1 - 2 m_2 - s_1 - m_1 s_1 - 3 m_2 s_1 + s_2 + m_1 s_2 - m_2 s_2 + s_1 s_2 + \right. \right. \\ & \quad \left. m_1 s_1 s_2 - m_2 s_1 s_2 + \sqrt{4 (1 + m_1 + m_2) (1 + s_1) \left( (s_1 + m_1 (2 + s_1)) s_2 - m_2 s_1 (2 + s_2) \right) + \right. \\ & \quad \left. (s_1 - s_2 - s_1 s_2 + m_1 (2 + s_1 - s_2 - s_1 s_2) + m_2 (2 + s_2 + s_1 (3 + s_2)))^2} \right) \left. \right\} \end{aligned}$$

The second solution is the bigger one, hence gives the zero.

$$\begin{aligned} \alpha_{1crit} = & \frac{1}{2 (1 + m_1 + m_2) (1 + s_1)} \left( -2 m_1 - 2 m_2 - s_1 - m_1 s_1 - 3 m_2 s_1 + s_2 + m_1 s_2 - m_2 s_2 + s_1 s_2 + \right. \\ & \left. m_1 s_1 s_2 - m_2 s_1 s_2 + \sqrt{4 (1 + m_1 + m_2) (1 + s_1) \left( (s_1 + m_1 (2 + s_1)) s_2 - m_2 s_1 (2 + s_2) \right) + \right. \\ & \left. (s_1 - s_2 - s_1 s_2 + m_1 (2 + s_1 - s_2 - s_1 s_2) + m_2 (2 + s_2 + s_1 (3 + s_2)))^2} \right); \end{aligned}$$

**Plot[α1crit /. {m1 → 0.1, m2 → 0.1, s2 → 0.05}, {s1, 0, 2}, PlotRange → All]**

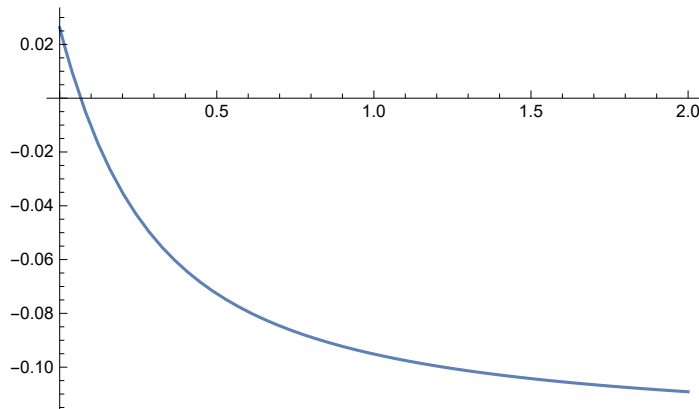

Therefore, if  $\alpha_1 < \alpha_{1crit}$ , then  $\text{cpolT20noR}[1, 0] < 0$  and  $p_{22} = 0$  is unstable.

Symmetric case :

**Simplify[α1crit /. {s2 → s1, m2 → m1}]**

$$\left( s_1^2 - 4 m_1 (1 + s_1) + \sqrt{16 m_1^2 (1 + s_1)^2 + s_1^2 (2 + s_1)^2} \right) / \left( 2 (1 + 2 m_1) (1 + s_1) \right)$$

Simplify[  
 Series[ $\left( s1^2 - 4 m1 (1 + s1) + \sqrt{16 m1^2 (1 + s1)^2 + s1^2 (2 + s1)^2} \right) / (2 (1 + 2 m1) (1 + s1))$ ,  
 {m1, 0, 1}], Assumptions → s1 > 0]  
 $s1 - 2 (1 + s1) m1 + O[m1]^2$

Therefore,  $\text{cpolT20noR}[1, 0] < 0$  if and only if  $\alpha1 < \left( s1^2 - 4 m1 (1 + s1) + \sqrt{16 m1^2 (1 + s1)^2 + s1^2 (2 + s1)^2} \right) / (2 (1 + 2 m1) (1 + s1)) \approx s1 - 2 m1 (1 + s1)$ .  
 In this case  $p22 = 0$  is unstable.

For the symmetric case, we also show that  $p22=0$  is stable if  $\alpha1 > \alpha1_{crit}$ .

To show this, determine minimum of the polynomial and its value at the minimum

Simplify[Solve[D[cpolT20noR[x, 0] /. {s2 → s1, α2 → α1, m2 → m1}, x] == 0, x]]  
 $\{ \{ x \rightarrow - \left( (-1 + m1) (s1^2 + 2 (2 + \alpha1) + 2 s1 (2 + \alpha1)) \right) / (4 (1 + s1) (1 + \alpha1)) \} \}$   
 Simplify[Reduce[ $\frac{s1^2 + 2 (2 + \alpha1) + 2 s1 (2 + \alpha1)}{4 (1 + s1) (1 + \alpha1)} < 1, \alpha1$ ], Assumptions → {s1 > 0, α1 > 0}]  
 $2 (1 + s1) \alpha1 > s1^2$

Simplify[  
 cpolT20noR[-(((-1 + m1) (s1^2 + 2 (2 + α1) + 2 s1 (2 + α1))) / (4 (1 + s1) (1 + α1))), 0] /.  
 {s2 → s1, α2 → α1, m2 → m1}]  
 $- \left( (s1^2 (2 + s1)^2 - 2 m1 s1^2 (2 + s1)^2 + m1^2 (s1^2 + 2 (2 + \alpha1) + 2 s1 (2 + \alpha1))^2) / (4 (1 + s1)) \right)$   
 Simplify[Reduce[  
 $- \left( (s1^2 (2 + s1)^2 - 2 m1 s1^2 (2 + s1)^2 + m1^2 (s1^2 + 2 (2 + \alpha1) + 2 s1 (2 + \alpha1))^2) / (4 (1 + s1)) \right) < 0 \ \&\& \ 0 < m1 < 1/2 \ \&\& \ s1 > 0 \ \&\& \ \alpha1 > 0$ ]]  
 $\alpha1 > 0 \ \&\& \ s1 > 0 \ \&\& \ 0 < m1 < \frac{1}{2}$

Therefore, the minimum is always negative!

It follows that both eigenvalues are less than one if and only if

$\alpha1 > \text{Max} \left[ \left( s1^2 - 4 m1 (1 + s1) + \sqrt{16 m1^2 (1 + s1)^2 + s1^2 (2 + s1)^2} \right) / (2 (1 + 2 m1) (1 + s1)) , \frac{s1^2}{2(1+s1)} \right]$   
 Reduce[ $\left( s1^2 - 4 m1 (1 + s1) + \sqrt{16 m1^2 (1 + s1)^2 + s1^2 (2 + s1)^2} \right) / (2 (1 + 2 m1) (1 + s1)) < \frac{s1^2}{2 (1 + s1)} \ \&\& \ 0 < m1 < 1/2 \ \&\& \ s1 > 0$ ]  
 False

It follows that both eigenvalues are less than one if and only if

$\alpha1 > \alpha1_{crit} = \left( s1^2 - 4 m1 (1 + s1) + \sqrt{16 m1^2 (1 + s1)^2 + s1^2 (2 + s1)^2} \right) / (2 (1 + 2 m1) (1 + s1)) \approx s1 - 2 m1 (1 + s1)$

In summary,  $p_{12} = p_{22} = 0$  is stable if and only if  $\alpha_1 > \alpha_{1crit}$

Study eigenvalues at  $p_{22} = 1$  (assuming symmetric parameters, i.e.,  $s_2 = s_1$ ,  $\alpha_2 = \alpha_1$ ,  $m_2 = m_1$ )

`Simplify[cpolT20noR[x, 1] /. {s2 → s1, α2 → α1, m2 → m1}]`

$$(1 + \alpha_1)^2 (-m_1^2 (2 + s_1 + \alpha_1) (2 + s_1 + \alpha_1 + s_1 \alpha_1) + (-2 + 2x + s_1 (-1 + 2x) - \alpha_1 + m_1 (2 + s_1 + \alpha_1)) (-2 + 2x - \alpha_1 - s_1 (1 + \alpha_1) + m_1 (2 + s_1 + \alpha_1 + s_1 \alpha_1)))$$

`Simplify[`

$$\text{Series}[(-m_1^2 (2 + s_1 + \alpha_1) (2 + s_1 + \alpha_1 + s_1 \alpha_1) + (-2 + 2x + s_1 (-1 + 2x) - \alpha_1 + m_1 (2 + s_1 + \alpha_1)) (-2 + 2x - \alpha_1 - s_1 (1 + \alpha_1) + m_1 (2 + s_1 + \alpha_1 + s_1 \alpha_1))), \{x, 0, 2\}]$$

$$- (-1 + 2m_1) (s_1^2 (1 + \alpha_1) + (2 + \alpha_1)^2 + s_1 (2 + \alpha_1)^2) +$$

$$2 (-1 + m_1) (s_1^2 (1 + \alpha_1) + 2 (2 + \alpha_1) + 2 s_1 (2 + \alpha_1)) x + 4 (1 + s_1) x^2 + O[x]^3$$

The constant term is positive if  $m_1 < 1/2$ ; the linear term is negative; the leading term is positive. Throughout, we assume  $m_1 < 1/2$ . Then the leading eigenvalue  $x$  is in  $(0, 1)$  if and only if  $\text{cpolT20noR}[1, 1] > 0$ .

$$\text{cpolT20P21noRsym}[x_] := - (-1 + 2m_1) (s_1^2 (1 + \alpha_1) + (2 + \alpha_1)^2 + s_1 (2 + \alpha_1)^2) + 2 (-1 + m_1) (s_1^2 (1 + \alpha_1) + 2 (2 + \alpha_1) + 2 s_1 (2 + \alpha_1)) x + 4 (1 + s_1) x^2$$

`Simplify[Series[cpolT20P21noRsym[1], {α1, 0, 3}]]`

$$-s_1^2 + (-s_1^2 - 4m_1 (1 + s_1)) \alpha_1 - (-1 + 2m_1) (1 + s_1) \alpha_1^2 + O[\alpha_1]^4$$

This is negative for  $\alpha_1 = 0$  and positive for sufficiently large  $\alpha_1$  provided  $0 < m_1 < 1/2$ .

`Simplify[Solve[cpolT20P21noRsym[1] == 0, α1]]`

$$\left\{ \left\{ \alpha_1 \rightarrow \left( -s_1^2 - 4m_1 (1 + s_1) + \sqrt{16m_1^2 (1 + s_1)^2 + s_1^2 (2 + s_1)^2} \right) / (2 (-1 + 2m_1) (1 + s_1)) \right\}, \left\{ \alpha_1 \rightarrow - \left( (s_1^2 + 4m_1 (1 + s_1) + \sqrt{16m_1^2 (1 + s_1)^2 + s_1^2 (2 + s_1)^2}) / (2 (-1 + 2m_1) (1 + s_1)) \right) \right\} \right\}$$

The first solution is negative if  $m_1 < 1/2$ . Thus  $\text{cpolT20P21noRsym}[1] > 0$  if  $\alpha_1 > \alpha_{1crit2}$ , where

$$\alpha_{1crit2} = \left( s_1^2 + 4m_1 (1 + s_1) + \sqrt{16m_1^2 (1 + s_1)^2 + s_1^2 (2 + s_1)^2} \right) / (2 (1 - 2m_1) (1 + s_1));$$

`FullSimplify[α1crit2 /. m1 → 0, Assumptions → s1 ≥ 0]`

$$s_1$$

`Simplify[Series[α1crit2, {m1, 0, 1}], Assumptions → s1 ≥ 0]`

$$s_1 + (2 + 2s_1) m_1 + O[m_1]^2$$

Therefore,

$$p_{12} = p_{22} = 1 \text{ is stable if and only if } \alpha_1 > \alpha_{1crit2} = s_1 + (2 + 2s_1) m_1 + O[m_1]^2$$

Because  $\alpha_{1crit2} > \alpha_{1crit1}$ , this implies stability of the whole edge.

Display parameter region in which  $p_{l2}=p_{22}=0$  ( $t_{l2}=t_{22}=0$ ) is stable (for symmetric parameters)

`Simplify[cpolT20noR[x, 0] /. {s2 → s1, α2 → α1, m2 → m1}]`

$$s_1^2 (-1 + 2x) (1 + \alpha_1) - (2 + \alpha_1 - 2x (1 + \alpha_1))^2 - s_1 (2 + \alpha_1 - 2x (1 + \alpha_1))^2 - 2m_1 (s_1^2 (-1 + x) (1 + \alpha_1) + (2 + \alpha_1) (-2 - \alpha_1 + 2x (1 + \alpha_1)) + s_1 (2 + \alpha_1) (-2 - \alpha_1 + 2x (1 + \alpha_1)))$$

The largest eigenvalue is the largest zero of the following polynomial (see above):

$$\text{cpolT20P20noRsym}[x_, s1_, \alpha1_, m1_] := s_1^2 (-1 + 2x) (1 + \alpha_1) - (2 + \alpha_1 - 2x (1 + \alpha_1))^2 - s_1 (2 + \alpha_1 - 2x (1 + \alpha_1))^2 - 2m_1 (s_1^2 (-1 + x) (1 + \alpha_1) + (2 + \alpha_1) (-2 - \alpha_1 + 2x (1 + \alpha_1)) + s_1 (2 + \alpha_1) (-2 - \alpha_1 + 2x (1 + \alpha_1)))$$

$$\text{EVsT20P20}[s1_, \alpha1_, m1_, r_] := x /. \text{NSolve}[\text{cpolT20P20noRsym}[x, s1, \alpha1, m1] == 0, x]$$

`EVsT20P20[0.2, 0.1, 0.01, 0.5]`

`{0.869445, 1.03555}`

The equilibrium  $p_{22} = 0$  is stable in the blue region

`RegionPlot[Abs[Max[EVsT20P20[10^s1, 10^a1, 0.01, 0.5]]] < 1, {s1, -3, 1}, {a1, -3, 4}, FrameLabel → {"Log10(s1)", "Log10(α1)"}]`

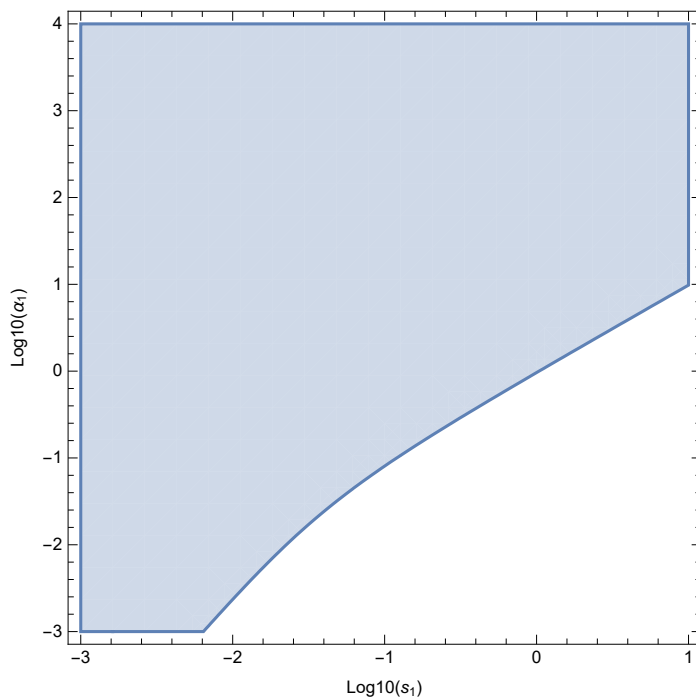

Display interval of p22 values on  $t12 = t22 = 0$  edge that is stable

`Simplify[cpolT20noR[x, p22] /. {α2 → α1, m2 → m1, s2 → s1}]`

$$-m1^2 (s1 (1 + \alpha1) + (2 + \alpha1) (1 + p22 \alpha1)) ((2 + \alpha1) (1 + p22 \alpha1) + s1 (1 + p22 \alpha1 (2 + \alpha1))) +$$

$$(-2 + 2x - \alpha1 - 2 p22 \alpha1 + 2x \alpha1 - p22 \alpha1^2 + s1 (-1 + 2x) (1 + \alpha1) +$$

$$m1 (s1 (1 + \alpha1) + (2 + \alpha1) (1 + p22 \alpha1))) (-2 + 2x - \alpha1 - 2 p22 \alpha1 + 2x \alpha1 - p22 \alpha1^2 -$$

$$s1 (1 + p22 \alpha1 (2 + \alpha1)) + m1 ((2 + \alpha1) (1 + p22 \alpha1) + s1 (1 + p22 \alpha1 (2 + \alpha1))))$$

```
cpolT20P2allnoRsym[p22_, x_, s1_, α1_, m1_] :=
  -m1^2 (s1 (1 + α1) + (2 + α1) (1 + p22 α1)) ((2 + α1) (1 + p22 α1) + s1 (1 + p22 α1 (2 + α1))) +
  (-2 + 2x - α1 - 2 p22 α1 + 2x α1 - p22 α1^2 + s1 (-1 + 2x) (1 + α1) +
  m1 (s1 (1 + α1) + (2 + α1) (1 + p22 α1))) (-2 + 2x - α1 - 2 p22 α1 + 2x α1 - p22 α1^2 -
  s1 (1 + p22 α1 (2 + α1)) + m1 ((2 + α1) (1 + p22 α1) + s1 (1 + p22 α1 (2 + α1))))
```

```
EVsT20P2allnoRsym[p22_, s1_, α1_, m1_] :=
  x /. NSolve[cpolT20P2allnoRsym[p22, x, s1, α1, m1] == 0, x]
```

```
EVsT20P2allnoRsym[.1, 0.2, 3, 0.01]
```

```
{0.752229, 0.866834}
```

Below, the colored region is the region of stability

```
RegionPlot[Abs[Max[EVsT20P2allnoRsym[p22, 0.2, 10^a1, 0.01]]] < 1,
  {a1, -2, 3}, {p22, 0, 0.5}, FrameLabel → {"Log10(α1)", "p22"}]
```

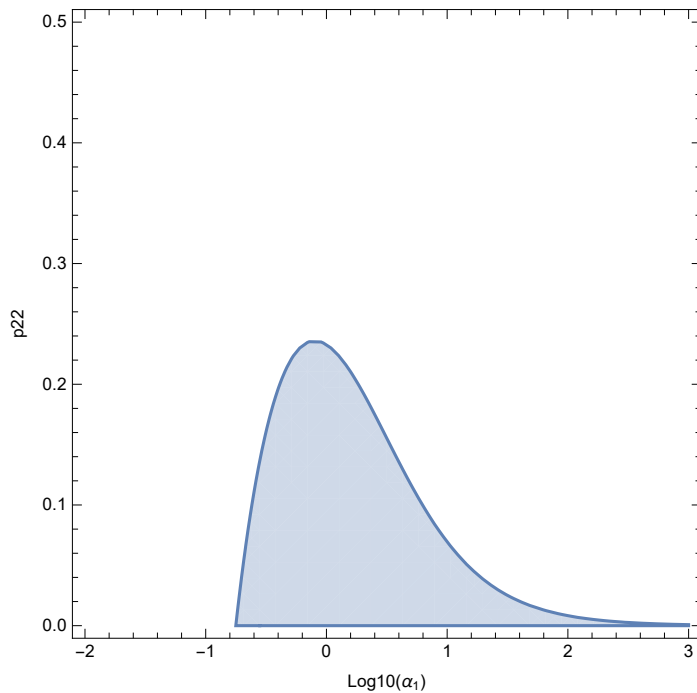

```
RegionPlot[{Abs[Max[EVsT20P2allnoRsym[p22, .05, 10^a1, 0.01]]] < 1,
  Abs[Max[EVsT20P2allnoRsym[p22, .2, 10^a1, 0.01]]] < 1,
  Abs[Max[EVsT20P2allnoRsym[p22, 1, 10^a1, 0.01]]] < 1},
{a1, -2, 4}, {p22, 0, 0.4}, FrameLabel -> {"Log10( $\alpha_1$ )", "p22"}]
```

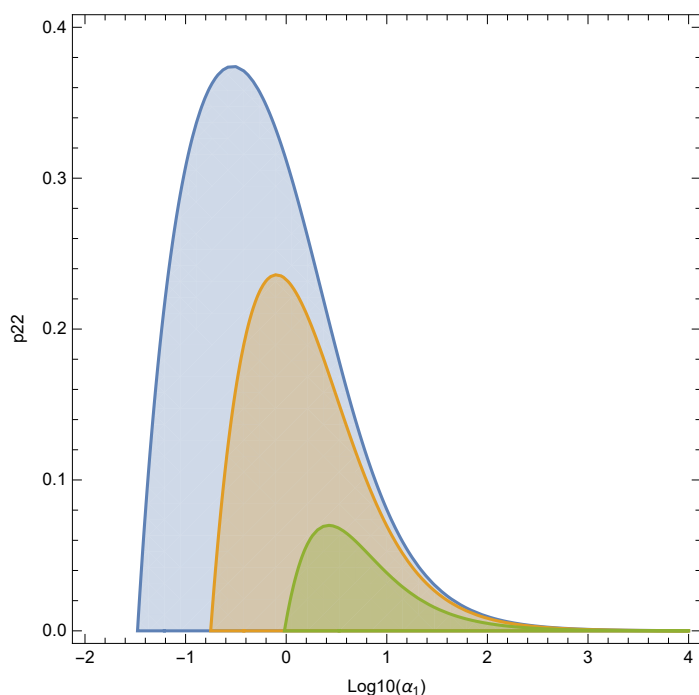

The region of stability decreases with increasing  $s$

```
RegionPlot[{Abs[Max[EVsT20P2allnoRsym[p22, 0.2, 10^a1, 0.001]]] < 1,
  Abs[Max[EVsT20P2allnoRsym[p22, 0.2, 10^a1, 0.01]]] < 1,
  Abs[Max[EVsT20P2allnoRsym[p22, 0.2, 10^a1, 0.1]]] < 1},
{a1, -2, 4}, {p22, 0, 0.4}, FrameLabel -> {"Log10( $\alpha_1$ )", "p22"}]
```

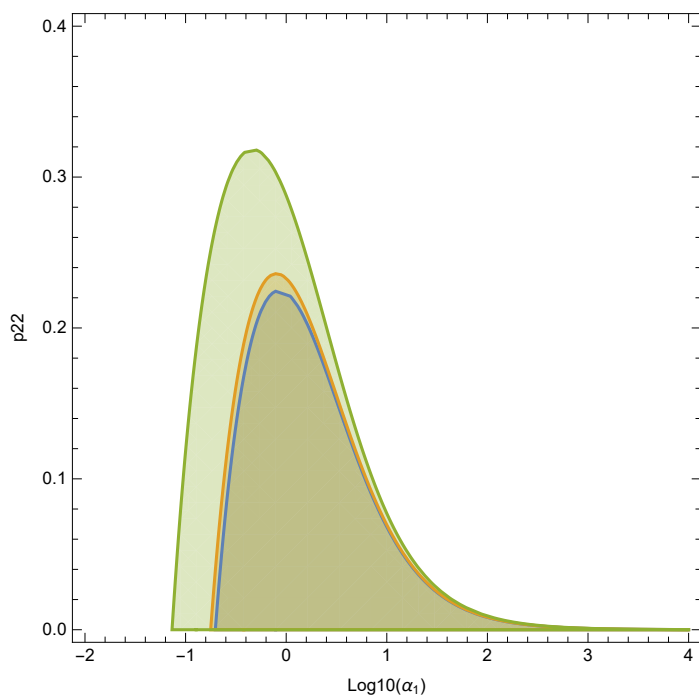

The region of stability increases with  $m$ !



## Stability of equilibria at the edge $t_{12} = t_{22} = 1$ (only symmetric case)

An analogous analysis can be performed

JacoT21 =

Simplify[D[itgenmale[s1, s2, α1, α2, m1, m2, r][{p12, t12, dd1, p22, t22, dd2}],  
{p12, t12, dd1, p22, t22, dd2}]] /. {t12 → 1, dd1 → 0, t22 → 1, dd2 → 0, p12 → p22}]

$$\begin{aligned} & \left\{ \left\{ 1 - m_1, 0, - \left( \left( (-1 + m_1) (p_{22} \alpha_2 + (-1 + p_{22}) \alpha_1 (1 + \alpha_2) + \right. \right. \right. \right. \\ & \quad \left. \left. \left. s_1 (-1 + (-1 + p_{22}) \alpha_2 + (-1 + p_{22}) \alpha_1 (1 + \alpha_2)) \right) \right) / (2 (1 + \alpha_2)) \right\}, m_1, 0, \right. \\ & \quad \left. (m_1 (p_{22} \alpha_2 + (-1 + p_{22}) \alpha_1 (1 + \alpha_2) + s_1 (-1 + (-1 + p_{22}) \alpha_2 + (-1 + p_{22}) \alpha_1 (1 + \alpha_2))) / \right. \\ & \quad \left. (2 (1 + \alpha_2))) \right\}, \\ & \left\{ 0, \left( (-1 + m_1) (-2 - 2 \alpha_2 + p_{22} \alpha_2 + (-1 + p_{22}) \alpha_1 (1 + \alpha_2) + \right. \right. \\ & \quad \left. \left. s_1 (-1 + (-1 + p_{22}) \alpha_2 + (-1 + p_{22}) \alpha_1 (1 + \alpha_2)) \right) \right) / (2 (1 + \alpha_2)), \right. \\ & \quad \left. 0, 0, - \left( (m_1 (-2 - 2 \alpha_2 + p_{22} \alpha_2 + (-1 + p_{22}) \alpha_1 (1 + \alpha_2) + \right. \right. \\ & \quad \left. \left. s_1 (-1 + (-1 + p_{22}) \alpha_2 + (-1 + p_{22}) \alpha_1 (1 + \alpha_2))) / (2 (1 + \alpha_2)) \right), 0 \right\}, \\ & \left\{ 0, - \left( \left( (-1 + m_1) (-1 + p_{22}) p_{22} r (1 + s_1) (\alpha_1 + \alpha_2 + \alpha_1 \alpha_2) \right) / (2 (1 + \alpha_2)) \right), \right. \\ & \quad \left. - \left( \left( (-1 + m_1) (-1 + r) (-2 - 2 \alpha_2 + p_{22} \alpha_2 + (-1 + p_{22}) \alpha_1 (1 + \alpha_2) + \right. \right. \right. \\ & \quad \left. \left. \left. s_1 (-1 + (-1 + p_{22}) \alpha_2 + (-1 + p_{22}) \alpha_1 (1 + \alpha_2)) \right) \right) / (2 (1 + \alpha_2)) \right), \right. \\ & \quad \left. 0, (m_1 (-1 + p_{22}) p_{22} r (1 + s_1) (\alpha_1 + \alpha_2 + \alpha_1 \alpha_2)) / (2 (1 + \alpha_2)), \right. \\ & \quad \left. (m_1 (-1 + r) (-2 - 2 \alpha_2 + p_{22} \alpha_2 + (-1 + p_{22}) \alpha_1 (1 + \alpha_2) + \right. \\ & \quad \left. \left. s_1 (-1 + (-1 + p_{22}) \alpha_2 + (-1 + p_{22}) \alpha_1 (1 + \alpha_2))) / (2 (1 + \alpha_2)) \right\}, \right. \\ & \quad \left\{ m_2, 0, (m_2 (p_{22} \alpha_2 + s_2 (1 + \alpha_2) + (-1 + p_{22}) \alpha_1 (1 + \alpha_2))) / (2 (1 + s_2) (1 + \alpha_2)), \right. \\ & \quad \left. 1 - m_2, 0, \right. \\ & \quad \left. - \left( \left( (-1 + m_2) (p_{22} \alpha_2 + s_2 (1 + \alpha_2) + (-1 + p_{22}) \alpha_1 (1 + \alpha_2)) \right) / (2 (1 + s_2) (1 + \alpha_2)) \right) \right\}, \\ & \left\{ 0, (m_2 (2 + 2 \alpha_2 - p_{22} \alpha_2 + s_2 (1 + \alpha_2) - (-1 + p_{22}) \alpha_1 (1 + \alpha_2))) / (2 (1 + s_2) (1 + \alpha_2)), 0, 0, \right. \\ & \quad \left. - \left( \left( (-1 + m_2) (2 + 2 \alpha_2 - p_{22} \alpha_2 + s_2 (1 + \alpha_2) - (-1 + p_{22}) \alpha_1 (1 + \alpha_2)) \right) / (2 (1 + s_2) (1 + \alpha_2)) \right), \right. \\ & \quad \left. 0 \right\}, \\ & \left\{ 0, (m_2 (-1 + p_{22}) p_{22} r (\alpha_1 + \alpha_2 + \alpha_1 \alpha_2)) / (2 (1 + s_2) (1 + \alpha_2)), \right. \\ & \quad \left. - \left( (m_2 (-1 + r) (2 + 2 \alpha_2 - p_{22} \alpha_2 + s_2 (1 + \alpha_2) - (-1 + p_{22}) \alpha_1 (1 + \alpha_2))) / \right. \right. \\ & \quad \left. \left. (2 (1 + s_2) (1 + \alpha_2)) \right), 0, \right. \\ & \quad \left. - \left( \left( (-1 + m_2) (-1 + p_{22}) p_{22} r (\alpha_1 + \alpha_2 + \alpha_1 \alpha_2) \right) / (2 (1 + s_2) (1 + \alpha_2)) \right), \right. \\ & \quad \left. \left( (-1 + m_2) (-1 + r) (2 + 2 \alpha_2 - p_{22} \alpha_2 + s_2 (1 + \alpha_2) - (-1 + p_{22}) \alpha_1 (1 + \alpha_2)) \right) / \right. \\ & \quad \left. \left. (2 (1 + s_2) (1 + \alpha_2)) \right) \right\} \end{aligned}$$

Characteristic polynomial at this equilibrium:

**cpolT21 = Simplify[Det[JacoT21 - x IdentityMatrix[6]]]**

$$\frac{1}{16 (1 + s2)^2 (1 + \alpha2)^4} \left( (-1 + x) (-1 + m1 + m2 + x) (m1 m2 (2 + 2 \alpha2 - p22 \alpha2 + s2 (1 + \alpha2) - (-1 + p22) \alpha1 (1 + \alpha2)) (-2 - 2 \alpha2 + p22 \alpha2 + (-1 + p22) \alpha1 (1 + \alpha2) + s1 (-1 + (-1 + p22) \alpha2 + (-1 + p22) \alpha1 (1 + \alpha2))) + (-2 + 2 x - \alpha1 + p22 \alpha1 - 2 \alpha2 + p22 \alpha2 + 2 x \alpha2 - \alpha1 \alpha2 + p22 \alpha1 \alpha2 + s2 (-1 + 2 x) (1 + \alpha2) + m2 (2 + 2 \alpha2 - p22 \alpha2 + s2 (1 + \alpha2) - (-1 + p22) \alpha1 (1 + \alpha2))) \right. \\ \left. (-2 + 2 x - \alpha1 + p22 \alpha1 - 2 \alpha2 + p22 \alpha2 + 2 x \alpha2 - \alpha1 \alpha2 + p22 \alpha1 \alpha2 + s1 (-1 + (-1 + p22) \alpha2 + (-1 + p22) \alpha1 (1 + \alpha2)) + m1 (2 + 2 \alpha2 - p22 \alpha2 - (-1 + p22) \alpha1 (1 + \alpha2) + s1 (1 + \alpha2 - p22 \alpha2 - (-1 + p22) \alpha1 (1 + \alpha2)))) \right) \\ \left( m1 m2 (-1 + r)^2 (2 + 2 \alpha2 - p22 \alpha2 + s2 (1 + \alpha2) - (-1 + p22) \alpha1 (1 + \alpha2)) (-2 - 2 \alpha2 + p22 \alpha2 + (-1 + p22) \alpha1 (1 + \alpha2) + s1 (-1 + (-1 + p22) \alpha2 + (-1 + p22) \alpha1 (1 + \alpha2))) + \right. \\ \left. (2 + s2 - 2 x - 2 s2 x + \alpha1 - p22 \alpha1 + 2 \alpha2 - p22 \alpha2 + s2 \alpha2 - 2 x \alpha2 - 2 s2 x \alpha2 + \alpha1 \alpha2 - p22 \alpha1 \alpha2 + m2 (-1 + r) (2 + 2 \alpha2 - p22 \alpha2 + s2 (1 + \alpha2) - (-1 + p22) \alpha1 (1 + \alpha2)) - \right. \\ \left. r (2 + 2 \alpha2 - p22 \alpha2 + s2 (1 + \alpha2) - (-1 + p22) \alpha1 (1 + \alpha2)) \right) \\ \left. (2 + s1 - 2 x + \alpha1 - p22 \alpha1 + s1 \alpha1 - p22 s1 \alpha1 + 2 \alpha2 - p22 \alpha2 + s1 \alpha2 - p22 s1 \alpha2 - 2 x \alpha2 + \alpha1 \alpha2 - p22 \alpha1 \alpha2 + s1 \alpha1 \alpha2 - p22 s1 \alpha1 \alpha2 - m1 (-1 + r) (-2 - 2 \alpha2 + p22 \alpha2 + (-1 + p22) \alpha1 (1 + \alpha2) + s1 (-1 + (-1 + p22) \alpha2 + (-1 + p22) \alpha1 (1 + \alpha2))) + r (-2 - 2 \alpha2 + p22 \alpha2 + (-1 + p22) \alpha1 (1 + \alpha2) + s1 (-1 + (-1 + p22) \alpha2 + (-1 + p22) \alpha1 (1 + \alpha2))) \right) \right)$$

There are four factors;  $x = 1$  and  $x = 1 - m1 - m2$  are always eigenvalues.

In addition, there is one factor without  $r$ , and one factor with  $r$ . Both factors are quadratic in  $x$  and given below:

```
cpolT21noR[x_, p22_] :=
(m1 m2 (2 + 2 α2 - p22 α2 + s2 (1 + α2) - (-1 + p22) α1 (1 + α2)) (-2 - 2 α2 + p22 α2 +
(-1 + p22) α1 (1 + α2) + s1 (-1 + (-1 + p22) α2 + (-1 + p22) α1 (1 + α2))) +
(-2 + 2 x - α1 + p22 α1 - 2 α2 + p22 α2 + 2 x α2 - α1 α2 + p22 α1 α2 + s2 (-1 + 2 x) (1 + α2) +
m2 (2 + 2 α2 - p22 α2 + s2 (1 + α2) - (-1 + p22) α1 (1 + α2)))
(-2 + 2 x - α1 + p22 α1 - 2 α2 + p22 α2 + 2 x α2 - α1 α2 + p22 α1 α2 +
s1 (-1 + (-1 + p22) α2 + (-1 + p22) α1 (1 + α2)) + m1 (2 + 2 α2 - p22 α2 -
(-1 + p22) α1 (1 + α2) + s1 (1 + α2 - p22 α2 - (-1 + p22) α1 (1 + α2))))
```

```
cpolT21R[x_, p22_] :=
(m1 m2 (-1 + r)^2 (2 + 2 α2 - p22 α2 + s2 (1 + α2) - (-1 + p22) α1 (1 + α2)) (-2 - 2 α2 + p22 α2 +
(-1 + p22) α1 (1 + α2) + s1 (-1 + (-1 + p22) α2 + (-1 + p22) α1 (1 + α2))) +
(2 + s2 - 2 x - 2 s2 x + α1 - p22 α1 + 2 α2 - p22 α2 + s2 α2 - 2 x α2 - 2 s2 x α2 + α1 α2 -
p22 α1 α2 + m2 (-1 + r) (2 + 2 α2 - p22 α2 + s2 (1 + α2) - (-1 + p22) α1 (1 + α2)) -
r (2 + 2 α2 - p22 α2 + s2 (1 + α2) - (-1 + p22) α1 (1 + α2)))
(2 + s1 - 2 x + α1 - p22 α1 + s1 α1 - p22 s1 α1 + 2 α2 - p22 α2 + s1 α2 - p22 s1 α2 - 2 x α2 +
α1 α2 - p22 α1 α2 + s1 α1 α2 - p22 s1 α1 α2 - m1 (-1 + r) (-2 - 2 α2 + p22 α2 + (-1 + p22)
α1 (1 + α2) + s1 (-1 + (-1 + p22) α2 + (-1 + p22) α1 (1 + α2))) + r (-2 - 2 α2 +
p22 α2 + (-1 + p22) α1 (1 + α2) + s1 (-1 + (-1 + p22) α2 + (-1 + p22) α1 (1 + α2))))
```

**Simplify[Series[cpolT21R[x, p22], {x, 0, 3}]]**

$$\begin{aligned} & (-1 + m1 + m2) (-1 + r)^2 (2 + 2\alpha2 - p22\alpha2 + s2(1 + \alpha2) - (-1 + p22)\alpha1(1 + \alpha2)) \\ & (-2 - 2\alpha2 + p22\alpha2 + (-1 + p22)\alpha1(1 + \alpha2) + s1(-1 + (-1 + p22)\alpha2 + (-1 + p22)\alpha1(1 + \alpha2))) + \\ & 2(-1 + r)(1 + \alpha2)(-(-1 + m2)(2 + 2\alpha2 - p22\alpha2 + s2(1 + \alpha2) - (-1 + p22)\alpha1(1 + \alpha2)) + \\ & (-1 + m1)(1 + s2)(-2 - 2\alpha2 + p22\alpha2 + (-1 + p22)\alpha1(1 + \alpha2) + \\ & s1(-1 + (-1 + p22)\alpha2 + (-1 + p22)\alpha1(1 + \alpha2)))) x + 4(1 + s2)(1 + \alpha2)^2 x^2 + 0[x]^4 \end{aligned}$$

**Simplify[Series[cpolT21noR[x, p22], {x, 0, 3}]]**

$$\begin{aligned} & (-1 + m1 + m2) (2 + 2\alpha2 - p22\alpha2 + s2(1 + \alpha2) - (-1 + p22)\alpha1(1 + \alpha2)) \\ & (-2 - 2\alpha2 + p22\alpha2 + (-1 + p22)\alpha1(1 + \alpha2) + s1(-1 + (-1 + p22)\alpha2 + (-1 + p22)\alpha1(1 + \alpha2))) + \\ & 2(1 + \alpha2)((-1 + m2)(2 + 2\alpha2 - p22\alpha2 + s2(1 + \alpha2) - (-1 + p22)\alpha1(1 + \alpha2)) - \\ & (-1 + m1)(1 + s2)(-2 - 2\alpha2 + p22\alpha2 + (-1 + p22)\alpha1(1 + \alpha2) + \\ & s1(-1 + (-1 + p22)\alpha2 + (-1 + p22)\alpha1(1 + \alpha2)))) x + 4(1 + s2)(1 + \alpha2)^2 x^2 + 0[x]^4 \end{aligned}$$

Therefore, we find

**Simplify[cpolT21R[x(1 - r), p22] - (1 - r)^2 cpolT21noR[x, p22]]**

0

Therefore, cpolT21noR[x,p22] = 0 if and only if cpolT21R[(1-r)x,p22] = 0.

Hence, x is an eigenvalue resulting from cpolT21noR[x,p22] = 0 if and only if (1-r)x is an eigenvalue resulting from cpolT21R[x,p22] = 0.

As a consequence, an equilibrium p22 (=p12) at this edge (t12=t22=1, dd1=dd2=0) is unstable if and only if there exists an eigenvalue x>1 with cpolT21noR[x,p22] = 0.

Thus, a change of stability at this edge occurs at a point p22 if cpolT20noR[1,p22] = 0.

The curve of equilibria that connects the edges t12=t22=0 and t12=t22=1 has its endpoint at the value p22, at which the stability at this edge changes, i.e., where cpolT21noR[1,p22] = 0.

This is easily computed numerically.

## Display interval of stability at the edge t12=t22=1

**Simplify[cpolT21noR[x, p22] /. {α2 → α1, s2 → s1, m2 → m1}]**

$$\begin{aligned} & m1^2 (s1(1 + \alpha1) - (2 + \alpha1)(-1 + (-1 + p22)\alpha1)) \\ & ((2 + \alpha1)(-1 + (-1 + p22)\alpha1) + s1(-1 + 2(-1 + p22)\alpha1 + (-1 + p22)\alpha1^2)) + \\ & (-2 + 2x - 3\alpha1 + 2p22\alpha1 + 2x\alpha1 - \alpha1^2 + p22\alpha1^2 + m1s1(1 + \alpha1) + \\ & s1(-1 + 2x)(1 + \alpha1) - m1(2 + \alpha1)(-1 + (-1 + p22)\alpha1)) \\ & (-2 + 2x - 3\alpha1 + 2p22\alpha1 + 2x\alpha1 - \alpha1^2 + p22\alpha1^2 + s1(-1 + 2(-1 + p22)\alpha1 + (-1 + p22)\alpha1^2) + \\ & m1(-(2 + \alpha1)(-1 + (-1 + p22)\alpha1) + s1(1 - 2(-1 + p22)\alpha1 - (-1 + p22)\alpha1^2))) \end{aligned}$$

**cpolT21P2allnoRsym[p22\_, x\_, s1\_, α1\_, m1\_] :=**

$$\begin{aligned} & m1^2 (s1(1 + \alpha1) - (2 + \alpha1)(-1 + (-1 + p22)\alpha1)) \\ & ((2 + \alpha1)(-1 + (-1 + p22)\alpha1) + s1(-1 + 2(-1 + p22)\alpha1 + (-1 + p22)\alpha1^2)) + \\ & (-2 + 2x - 3\alpha1 + 2p22\alpha1 + 2x\alpha1 - \alpha1^2 + p22\alpha1^2 + m1s1(1 + \alpha1) + \\ & s1(-1 + 2x)(1 + \alpha1) - m1(2 + \alpha1)(-1 + (-1 + p22)\alpha1)) (-2 + 2x - 3\alpha1 + \\ & 2p22\alpha1 + 2x\alpha1 - \alpha1^2 + p22\alpha1^2 + s1(-1 + 2(-1 + p22)\alpha1 + (-1 + p22)\alpha1^2) + \\ & m1(-(2 + \alpha1)(-1 + (-1 + p22)\alpha1) + s1(1 - 2(-1 + p22)\alpha1 - (-1 + p22)\alpha1^2))) \end{aligned}$$

```
EVsT21P2allnoRsym[p22_, s1_,  $\alpha$ 1_, m1_] :=  
x /. NSolve[cpolT21P2allnoRsym[p22, x, s1,  $\alpha$ 1, m1] == 0, x]
```

```
EVsT21P2allnoRsym[.1, 0.2, 3, 0.01]
```

```
{1.9895, 2.64907}
```

Below, the colored region is the region of stability

```
RegionPlot[Abs[Max[EVsT21P2allnoRsym[p22, 0.2, 10^a1, 0.01]]] < 1,  
{a1, -2, 3}, {p22, 0.7, 1}, FrameLabel -> {"Log10( $\alpha$ 1)", "p22"}]
```

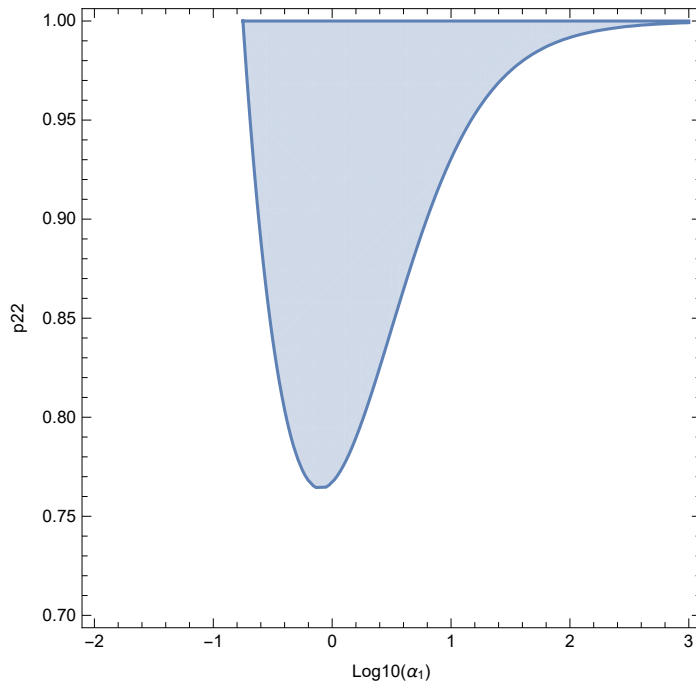

```
RegionPlot[{Abs[Max[EVST21P2allnoRsym[p22, .05, 10a1, 0.01]]] < 1,
  Abs[Max[EVST21P2allnoRsym[p22, .2, 10a1, 0.01]]] < 1,
  Abs[Max[EVST21P2allnoRsym[p22, 1, 10a1, 0.01]]] < 1},
{a1, -2, 4}, {p22, 0.6, 1}, FrameLabel → {"Log10( $\alpha_1$ )", "p22"}]
```

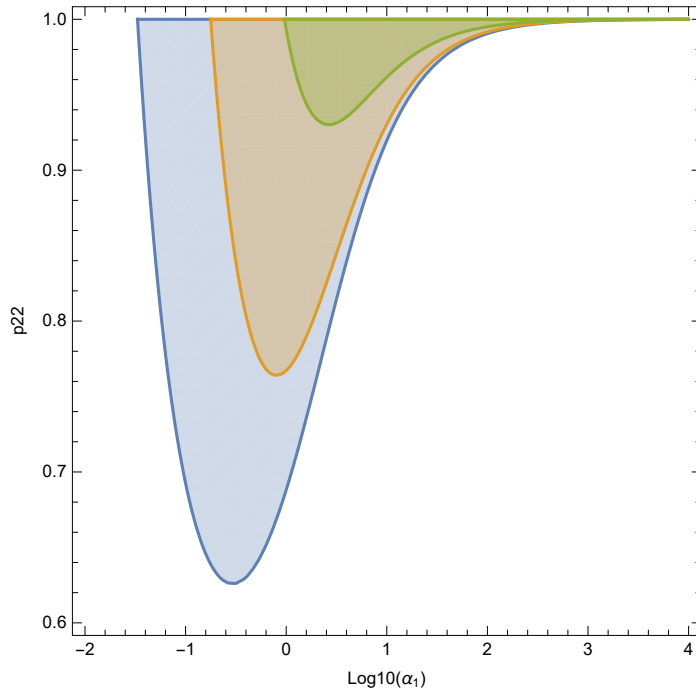

Note the 1-p22 gives the corresponding interval at  $t_{12} = t_{22} = 0$  (because of symmetry)

## 2.2 General equilibrium conditions and computation of polymorphic equilibria

### 2.2.1 Basic definition

Solving  $\text{deltagenmale} = 0$  yields the potential equilibria (conditional on admissibility)

$\text{deltagenmale} =$

```
Simplify[itgenmale[s1, s2,  $\alpha_1$ ,  $\alpha_2$ , m1, m2, r][{p12, t12, dd1, p22, t22, dd2}] -
  {p12, t12, dd1, p22, t22, dd2}]
```

$\text{deltagenmale} =$

$$\begin{aligned} & \{-p_{12} + (dd_1 (s_1 + \alpha_1 + s_1 \alpha_1) (-1 + s_1 (-1 + t_{12}) - t_{12} \alpha_2) + (-1 + m_1)^2 m_1 p_{12}^2 (1 + s_1) \\ & (t_{12} - t_{22}) (\alpha_1 + \alpha_2 + \alpha_1 \alpha_2) + m_1^3 p_{22} (t_{12} - t_{22}) (s_1^2 (t_{12} - t_{22}) (1 + \alpha_1) + \\ & (-t_{12} + t_{22}) \alpha_1 \alpha_2 + s_1 (-t_{12} + t_{22}) (\alpha_1 (-1 + \alpha_2) + \alpha_2) + p_{22} (\alpha_1 + \alpha_2 + \alpha_1 \alpha_2) + \\ & p_{22} s_1 (\alpha_1 + \alpha_2 + \alpha_1 \alpha_2)) + m_1 ((s_1 + \alpha_1 + s_1 \alpha_1) (dd_2 (-1 + s_1 (-1 + t_{12}) - \\ & t_{12} \alpha_2) + dd_1 (1 + s_1 (1 - 2 t_{12} + t_{22}) + 2 t_{12} \alpha_2 - t_{22} \alpha_2)) + \\ & p_{22} (2 + s_1^2 (-1 + t_{12}) (-2 + t_{12} + t_{22}) (1 + \alpha_1) + dd_1 \alpha_2 + 2 t_{12} \alpha_2 + \\ & dd_1 \alpha_1 (1 + \alpha_2) - (-2 + t_{12} + t_{22}) \alpha_1 (1 + t_{12} \alpha_2) + s_1 (4 - t_{22} + 4 \alpha_1 + \\ & dd_1 \alpha_1 - 2 t_{22} \alpha_1 + dd_1 \alpha_2 + dd_1 \alpha_1 \alpha_2 - t_{12}^2 (\alpha_1 (-1 + \alpha_2) + \alpha_2) - \\ & t_{12} (3 + \alpha_1 (4 + t_{22} (-1 + \alpha_2) - 2 \alpha_2) + (-2 + t_{22}) \alpha_2))) + \\ & m_1^2 ((dd_1 - dd_2) (t_{12} - t_{22}) (s_1 + \alpha_1 + s_1 \alpha_1) (s_1 - \alpha_2) - p_{22}^2 (1 + s_1) \end{aligned}$$

$$\begin{aligned}
& (t_{12} - t_{22}) (\alpha_1 + \alpha_2 + \alpha_1 \alpha_2) + p_{22} (-dd_1 \alpha_1 + dd_2 \alpha_1 + t_{12} \alpha_1 - \\
& \quad t_{22} \alpha_1 - s_1^2 (2 t_{12}^2 - (-3 + t_{22}) t_{22} - t_{12} (3 + t_{22})) (1 + \alpha_1) - \\
& \quad dd_1 \alpha_2 + dd_2 \alpha_2 - 2 t_{12} \alpha_2 + 2 t_{22} \alpha_2 - dd_1 \alpha_1 \alpha_2 + dd_2 \alpha_1 \alpha_2 - \\
& \quad 2 t_{12} \alpha_1 \alpha_2 + 2 t_{12}^2 \alpha_1 \alpha_2 + 2 t_{22} \alpha_1 \alpha_2 - t_{12} t_{22} \alpha_1 \alpha_2 - t_{22}^2 \alpha_1 \alpha_2 + \\
& \quad s_1 (2 t_{12}^2 (\alpha_1 (-1 + \alpha_2) + \alpha_2) - t_{22}^2 (\alpha_1 (-1 + \alpha_2) + \alpha_2) + \\
& \quad \quad t_{22} (-3 + 2 \alpha_1 (-2 + \alpha_2) + 2 \alpha_2) - t_{12} (-3 + 2 \alpha_1 (-2 + \alpha_2) + \\
& \quad \quad \quad t_{22} \alpha_1 (-1 + \alpha_2) + (2 + t_{22}) \alpha_2) - (dd_1 - dd_2) (\alpha_1 + \alpha_2 + \alpha_1 \alpha_2))) - \\
& (-1 + m_1) p_{12} (2 + 2 \alpha_1 + dd_1 \alpha_1 - dd_1 m_1 \alpha_1 + dd_2 m_1 \alpha_1 - 2 t_{12} \alpha_1 + m_1 t_{12} \alpha_1 - \\
& \quad m_1 p_{22} t_{12} \alpha_1 + 2 m_1^2 p_{22} t_{12} \alpha_1 - m_1 t_{22} \alpha_1 + m_1 p_{22} t_{22} \alpha_1 - \\
& \quad 2 m_1^2 p_{22} t_{22} \alpha_1 + s_1^2 (2 + (2 - 3 m_1 + m_1^2) t_{12}^2 - 3 m_1 t_{22} + m_1^2 t_{22}^2 + \\
& \quad \quad t_{12} (-4 - 2 m_1^2 t_{22} + 3 m_1 (1 + t_{22}))) (1 + \alpha_1) + dd_1 \alpha_2 - dd_1 m_1 \alpha_2 + \\
& \quad dd_2 m_1 \alpha_2 + 2 t_{12} \alpha_2 - 2 m_1 t_{12} \alpha_2 - m_1 p_{22} t_{12} \alpha_2 + 2 m_1^2 p_{22} t_{12} \alpha_2 + \\
& \quad 2 m_1 t_{22} \alpha_2 + m_1 p_{22} t_{22} \alpha_2 - 2 m_1^2 p_{22} t_{22} \alpha_2 + dd_1 \alpha_1 \alpha_2 - dd_1 m_1 \alpha_1 \alpha_2 + \\
& \quad dd_2 m_1 \alpha_1 \alpha_2 + 2 t_{12} \alpha_1 \alpha_2 - 2 m_1 t_{12} \alpha_1 \alpha_2 - m_1 p_{22} t_{12} \alpha_1 \alpha_2 + 2 m_1^2 p_{22} t_{12} \alpha_1 \alpha_2 - \\
& \quad 2 t_{12}^2 \alpha_1 \alpha_2 + 3 m_1 t_{12}^2 \alpha_1 \alpha_2 - m_1^2 t_{12}^2 \alpha_1 \alpha_2 + 2 m_1 t_{22} \alpha_1 \alpha_2 + m_1 p_{22} t_{22} \alpha_1 \alpha_2 - \\
& \quad 2 m_1^2 p_{22} t_{22} \alpha_1 \alpha_2 - 3 m_1 t_{12} t_{22} \alpha_1 \alpha_2 + 2 m_1^2 t_{12} t_{22} \alpha_1 \alpha_2 - m_1^2 t_{22}^2 \alpha_1 \alpha_2 + \\
& \quad s_1 (4 + 4 \alpha_1 + dd_1 \alpha_1 + dd_1 \alpha_2 + dd_1 \alpha_1 \alpha_2 - (2 - 3 m_1 + m_1^2) t_{12}^2 (\alpha_1 (-1 + \alpha_2) + \alpha_2) - \\
& \quad \quad m_1^2 t_{22} (t_{22} (\alpha_1 (-1 + \alpha_2) + \alpha_2) + 2 p_{22} (\alpha_1 + \alpha_2 + \alpha_1 \alpha_2))) + \\
& \quad m_1 ((-dd_1 + dd_2) (\alpha_1 + \alpha_2 + \alpha_1 \alpha_2) + t_{22} (-3 + (2 + p_{22}) \alpha_2 + \alpha_1 (-4 + p_{22} + \\
& \quad \quad 2 \alpha_2 + p_{22} \alpha_2))) + t_{12} (2 (-2 + \alpha_1 (-3 + \alpha_2) + \alpha_2) - m_1 (-3 + \\
& \quad \quad (2 + p_{22} + 3 t_{22}) \alpha_2 + \alpha_1 (-4 + p_{22} - 3 t_{22} + 2 \alpha_2 + p_{22} \alpha_2 + 3 t_{22} \alpha_2))) + \\
& \quad 2 m_1^2 (t_{22} (\alpha_1 (-1 + \alpha_2) + \alpha_2) + p_{22} (\alpha_1 + \alpha_2 + \alpha_1 \alpha_2)))) / \\
& (2 (1 + (1 + (-1 + m_1) t_{12} - m_1 t_{22}) \alpha_1 + s_1 (1 + (-1 + m_1) t_{12} - m_1 t_{22}) (1 + \alpha_1)) \\
& \quad (1 + s_1 + (-1 + m_1) s_1 t_{12} - m_1 s_1 t_{22} + m_1 t_{22} \alpha_2 + t_{12} (\alpha_2 - m_1 \alpha_2))), \\
& -t_{12} - (((-1 + m_1) t_{12} - m_1 t_{22}) (2 + s_1^2 (1 + (-1 + m_1) t_{12} - m_1 t_{22})^2 (1 + \alpha_1) + \\
& \quad p_{12} \alpha_2 - m_1 p_{12} \alpha_2 + m_1 p_{22} \alpha_2 + 2 t_{12} \alpha_2 - 2 m_1 t_{12} \alpha_2 - \\
& \quad p_{12} t_{12} \alpha_2 + 2 m_1 p_{12} t_{12} \alpha_2 - m_1^2 p_{12} t_{12} \alpha_2 - m_1 p_{22} t_{12} \alpha_2 + \\
& \quad m_1^2 p_{22} t_{12} \alpha_2 + 2 m_1 t_{22} \alpha_2 - m_1 p_{12} t_{22} \alpha_2 + m_1^2 p_{12} t_{22} \alpha_2 - \\
& \quad m_1^2 p_{22} t_{22} \alpha_2 - (1 + (-1 + m_1) t_{12} - m_1 t_{22}) \alpha_1 \\
& \quad (-1 - t_{12} \alpha_2 + (-1 + m_1) p_{12} (1 + \alpha_2) - m_1 (p_{22} + p_{22} \alpha_2 - t_{12} \alpha_2 + t_{22} \alpha_2))) - \\
& \quad s_1 (1 + (-1 + m_1) t_{12} - m_1 t_{22}) (-3 - p_{12} \alpha_2 + m_1 p_{12} \alpha_2 - m_1 p_{22} \alpha_2 - \\
& \quad \quad t_{12} \alpha_2 + m_1 t_{12} \alpha_2 - m_1 t_{22} \alpha_2 + \alpha_1 (-2 + t_{12} - t_{12} \alpha_2 + (-1 + m_1) p_{12} \\
& \quad \quad (1 + \alpha_2) - m_1 (p_{22} + t_{12} - t_{22} + p_{22} \alpha_2 - t_{12} \alpha_2 + t_{22} \alpha_2)))) / \\
& (2 (1 + (1 + (-1 + m_1) t_{12} - m_1 t_{22}) \alpha_1 + s_1 (1 + (-1 + m_1) t_{12} - m_1 t_{22}) (1 + \alpha_1)) \\
& \quad (1 + s_1 + (-1 + m_1) s_1 t_{12} - m_1 s_1 t_{22} + m_1 t_{22} \alpha_2 + t_{12} (\alpha_2 - m_1 \alpha_2))), \frac{1}{4} \\
& (-4 dd_1 - ((dd_1 (-1 + m_1) - dd_2 m_1 - p_{12} t_{12} + m_1 p_{12} t_{12} - m_1 p_{22} t_{22}) (dd_1 (-1 + m_1) - \\
& \quad dd_2 m_1 + t_{12} - m_1 t_{12} - p_{12} t_{12} + m_1 p_{12} t_{12} + m_1 t_{22} - m_1 p_{22} t_{22}))) / \\
& \quad (1 + (1 + (-1 + m_1) t_{12} - m_1 t_{22}) \alpha_1 + s_1 (1 + (-1 + m_1) t_{12} - m_1 t_{22}) (1 + \alpha_1))) + \\
& (r (dd_1 (-1 + m_1) - dd_2 m_1 - p_{12} t_{12} + m_1 p_{12} t_{12} - m_1 p_{22} t_{22}) \\
& \quad (-1 + dd_1 (-1 + m_1) - dd_2 m_1 + p_{12} - m_1 p_{12} + m_1 p_{22} + t_{12} - \\
& \quad \quad m_1 t_{12} - p_{12} t_{12} + m_1 p_{12} t_{12} + m_1 t_{22} - m_1 p_{22} t_{22}))) / \\
& \quad (1 + (1 + (-1 + m_1) t_{12} - m_1 t_{22}) \alpha_1 + s_1 (1 + (-1 + m_1) t_{12} - m_1 t_{22}) (1 + \alpha_1)) - \\
& ((dd_1 (-1 + m_1) - dd_2 m_1 + t_{12} - m_1 t_{12} - p_{12} t_{12} + m_1 p_{12} t_{12} + m_1 t_{22} - m_1 p_{22} t_{22}) \\
& \quad (-1 + dd_1 (-1 + m_1) - dd_2 m_1 + p_{12} - m_1 p_{12} + m_1 p_{22} + t_{12} - \\
& \quad \quad m_1 t_{12} - p_{12} t_{12} + m_1 p_{12} t_{12} + m_1 t_{22} - m_1 p_{22} t_{22}))) / \\
& \quad (1 + (1 + (-1 + m_1) t_{12} - m_1 t_{22}) \alpha_1 + s_1 (1 + (-1 + m_1) t_{12} - m_1 t_{22}) (1 + \alpha_1)) + \\
& (2 (dd_1 - dd_1 m_1 + dd_2 m_1 - t_{12} + m_1 t_{12} + p_{12} t_{12} - \\
& \quad m_1 p_{12} t_{12} - m_1 t_{22} + m_1 p_{22} t_{22})^2) /
\end{aligned}$$

[illegible]

[illegible]



$$\begin{aligned}
& \left( (dd1(-1+m1) - dd2 m1 - p12 t12 + m1 p12 t12 - m1 p22 t22) (dd1(-1+m1) - \right. \\
& \quad \left. dd2 m1 + p12 - m1 p12 + m1 p22 - p12 t12 + m1 p12 t12 - m1 p22 t22) (1+\alpha2) \right) / \\
& \quad (-1+s1(-1+t12-m1 t12+m1 t22) + (-1+m1) t12 \alpha2 - m1 t22 \alpha2) + \\
& \left( (dd1(-1+m1) - dd2 m1 - p12 t12 + m1 p12 t12 - m1 p22 t22) (dd1(-1+m1) - \right. \\
& \quad \left. dd2 m1 + t12 - m1 t12 - p12 t12 + m1 p12 t12 + m1 t22 - m1 p22 t22) (1+\alpha2) \right) / \\
& \quad (-1+s1(-1+t12-m1 t12+m1 t22) + (-1+m1) t12 \alpha2 - m1 t22 \alpha2) - \\
& \left( (1+s1) (dd1(-1+m1) - dd2 m1 - p12 t12 + m1 p12 t12 - m1 p22 t22) (dd1(-1+m1) - \right. \\
& \quad \left. dd2 m1 + p12 - m1 p12 + m1 p22 - p12 t12 + m1 p12 t12 - m1 p22 t22) \right) / \\
& \quad (1+s1 + (-1+m1) s1 t12 - m1 s1 t22 + m1 t22 \alpha2 + t12 (\alpha2 - m1 \alpha2)) - \\
& \left( (-1+r) (1+s1) (dd1(-1+m1) - dd2 m1 - p12 t12 + m1 p12 t12 - m1 p22 t22) \right. \\
& \quad \left. (-1+dd1(-1+m1) - dd2 m1 + p12 - m1 p12 + m1 p22 + t12 - \right. \\
& \quad \left. m1 t12 - p12 t12 + m1 p12 t12 + m1 t22 - m1 p22 t22) \right) / \\
& \quad (1+s1 + (-1+m1) s1 t12 - m1 s1 t22 + m1 t22 \alpha2 + t12 (\alpha2 - m1 \alpha2)) + \\
& \left( r (dd1(-1+m1) - dd2 m1 + p12 - m1 p12 + m1 p22 - p12 t12 + m1 p12 t12 - m1 p22 t22) \right. \\
& \quad \left. (dd1(-1+m1) - dd2 m1 + t12 - m1 t12 - p12 t12 + m1 p12 t12 + m1 t22 - m1 p22 t22) \right. \\
& \quad \left. (1+\alpha2) \right) / (1+s1 + (-1+m1) s1 t12 - m1 s1 t22 + m1 t22 \alpha2 + t12 (\alpha2 - m1 \alpha2)) + \\
& \left( 2 (dd1 - dd1 m1 + dd2 m1 + p12 t12 - m1 p12 t12 + m1 p22 t22)^2 (1+\alpha2) \right) / \\
& \quad (1+s1 + (-1+m1) s1 t12 - m1 s1 t22 + m1 t22 \alpha2 + t12 (\alpha2 - m1 \alpha2)) \Big), \\
& -p22 + (dd2 (s2 - \alpha1) (1+t22 \alpha2 + s2 t22 (1+\alpha2)) - m2^3 (p12 - p22) \\
& \quad (t12 - t22) (p12 \alpha1 - p22 \alpha1 + p12 \alpha2 - p22 \alpha2 + p12 \alpha1 \alpha2 - \\
& \quad p22 \alpha1 \alpha2 + t12 \alpha1 \alpha2 - t22 \alpha1 \alpha2 - s2^2 (t12 - t22) (1+\alpha2) + \\
& \quad s2 ((t12 - t22) (\alpha1 - \alpha2 + \alpha1 \alpha2) + p12 (\alpha1 + \alpha2 + \alpha1 \alpha2) - p22 (\alpha1 + \alpha2 + \alpha1 \alpha2))) + \\
& p22 (2 + dd2 \alpha2 + 2 t22 \alpha2 + 2 s2^2 t22^2 (1+\alpha2) + dd2 \alpha1 (1+\alpha2) - \\
& \quad 2 (-1+t22) \alpha1 (1+t22 \alpha2) + \\
& \quad s2 (-2 t22^2 (\alpha1 - \alpha2 + \alpha1 \alpha2) + dd2 (\alpha1 + \alpha2 + \alpha1 \alpha2) + 2 t22 (2 + \alpha1 + \alpha2 + \alpha1 \alpha2))) + \\
& m2^2 ((dd1 - dd2) (t12 - t22) (s2 - \alpha1) (s2 + \alpha2 + s2 \alpha2) + p12^2 (1+s2) \\
& \quad (t12 - t22) (\alpha1 + \alpha2 + \alpha1 \alpha2) + 2 p22^2 (1+s2) (t12 - t22) (\alpha1 + \alpha2 + \alpha1 \alpha2) + \\
& p12 (dd1 \alpha1 - dd2 \alpha1 - t12 \alpha1 - 3 p22 t12 \alpha1 + t22 \alpha1 + 3 p22 t22 \alpha1 + dd1 \alpha2 - \\
& \quad dd2 \alpha2 + 2 t12 \alpha2 - 3 p22 t12 \alpha2 - 2 t22 \alpha2 + 3 p22 t22 \alpha2 + dd1 \alpha1 \alpha2 - dd2 \alpha1 \alpha2 + \\
& \quad 2 t12 \alpha1 \alpha2 - 3 p22 t12 \alpha1 \alpha2 - t12^2 \alpha1 \alpha2 - 2 t22 \alpha1 \alpha2 + 3 p22 t22 \alpha1 \alpha2 - \\
& \quad t12 t22 \alpha1 \alpha2 + 2 t22^2 \alpha1 \alpha2 + s2^2 (t12^2 + t12 t22 - 2 t22^2) (1+\alpha2) - \\
& \quad s2 (t12^2 (\alpha1 - \alpha2 + \alpha1 \alpha2) - 2 t22^2 (\alpha1 - \alpha2 + \alpha1 \alpha2) - (dd1 - dd2) \\
& \quad (\alpha1 + \alpha2 + \alpha1 \alpha2) + t22 (3 + (2 - 3 p22) \alpha2 - (-2 + 3 p22) \alpha1 (1+\alpha2)) + \\
& \quad t12 (-3 + (-2 + 3 p22 - t22) \alpha2 + (-2 + 3 p22 + t22) \alpha1 (1+\alpha2))) + \\
& p22 (-dd1 \alpha1 + dd2 \alpha1 + t12 \alpha1 - t22 \alpha1 - dd1 \alpha2 + dd2 \alpha2 - 2 t12 \alpha2 + \\
& \quad 2 t22 \alpha2 - dd1 \alpha1 \alpha2 + dd2 \alpha1 \alpha2 - 2 t12 \alpha1 \alpha2 - t12^2 \alpha1 \alpha2 + 2 t22 \alpha1 \alpha2 + \\
& \quad 5 t12 t22 \alpha1 \alpha2 - 4 t22^2 \alpha1 \alpha2 + s2^2 (t12^2 - 5 t12 t22 + 4 t22^2) (1+\alpha2) - \\
& \quad s2 (t12^2 (\alpha1 - \alpha2 + \alpha1 \alpha2) + 4 t22^2 (\alpha1 - \alpha2 + \alpha1 \alpha2) + \\
& \quad (dd1 - dd2) (\alpha1 + \alpha2 + \alpha1 \alpha2) - t22 (3 + 2 \alpha2 + 2 \alpha1 (1+\alpha2)) + \\
& \quad t12 (3 + 2 \alpha2 + 5 t22 \alpha2 - (-2 + 5 t22) \alpha1 (1+\alpha2)))) + \\
& m2 (-p22^2 (1+s2) (t12 - t22) (\alpha1 + \alpha2 + \alpha1 \alpha2) + (s2 - \alpha1) (dd2 (-1+t12 \alpha2 - \\
& \quad 2 t22 \alpha2 + s2 (t12 - 2 t22) (1+\alpha2)) + dd1 (1+t22 \alpha2 + s2 t22 (1+\alpha2))) + \\
& p22 (-2 - 2 \alpha1 + dd1 \alpha1 - 2 dd2 \alpha1 - t12 \alpha1 + 3 t22 \alpha1 + dd1 \alpha2 - 2 dd2 \alpha2 + \\
& \quad 2 t12 \alpha2 - 4 t22 \alpha2 + dd1 \alpha1 \alpha2 - 2 dd2 \alpha1 \alpha2 + 2 t12 \alpha1 \alpha2 - 4 t22 \alpha1 \alpha2 - \\
& \quad 3 t12 t22 \alpha1 \alpha2 + 5 t22^2 \alpha1 \alpha2 + s2^2 (3 t12 - 5 t22) t22 (1+\alpha2) + \\
& \quad s2 (5 t22^2 (\alpha1 - \alpha2 + \alpha1 \alpha2) + (dd1 - 2 dd2) (\alpha1 + \alpha2 + \alpha1 \alpha2) - t22 (7 + 4 \alpha2 + \\
& \quad 4 \alpha1 (1+\alpha2)) + t12 (3 + 2 \alpha2 + 3 t22 \alpha2 - (-2 + 3 t22) \alpha1 (1+\alpha2)))) + \\
& p12 (2 + 2 \alpha1 + dd2 \alpha1 - t12 \alpha1 + p22 t12 \alpha1 - t22 \alpha1 - p22 t22 \alpha1 + dd2 \alpha2 + \\
& \quad p22 t12 \alpha2 + 2 t22 \alpha2 - p22 t22 \alpha2 + dd2 \alpha1 \alpha2 + p22 t12 \alpha1 \alpha2 + \\
& \quad 2 t22 \alpha1 \alpha2 - p22 t22 \alpha1 \alpha2 - t12 t22 \alpha1 \alpha2 - t22^2 \alpha1 \alpha2 +
\end{aligned}$$

$$\begin{aligned}
& s2^2 t22 (t12 + t22) (1 + \alpha2) + s2 (-t22^2 (\alpha1 - \alpha2 + \alpha1 \alpha2) + \\
& \quad dd2 (\alpha1 + \alpha2 + \alpha1 \alpha2) - t22 (-3 + (-2 + p22) \alpha2 + (-2 + p22) \alpha1 (1 + \alpha2)) + \\
& \quad t12 (1 - t22 (\alpha1 - \alpha2 + \alpha1 \alpha2) + p22 (\alpha1 + \alpha2 + \alpha1 \alpha2))) / \\
& (2 (1 + s2 t22 + m2 (t12 - t22) (s2 - \alpha1) + \alpha1 - t22 \alpha1) (1 + t22 \alpha2 + \\
& \quad s2 t22 (1 + \alpha2) + m2 (t12 - t22) (s2 + \alpha2 + s2 \alpha2))) , \\
& -t22 + ((m2 (t12 - t22) + t22) (2 + m2 p12 \alpha2 + p22 \alpha2 - m2 p22 \alpha2 + 2 m2 t12 \alpha2 - \\
& \quad m2^2 p12 t12 \alpha2 - m2 p22 t12 \alpha2 + m2^2 p22 t12 \alpha2 + \\
& \quad 2 t22 \alpha2 - 2 m2 t22 \alpha2 - m2 p12 t22 \alpha2 + m2^2 p12 t22 \alpha2 - \\
& \quad p22 t22 \alpha2 + 2 m2 p22 t22 \alpha2 - m2^2 p22 t22 \alpha2 + \\
& \quad s2^2 (m2^2 (t12 - t22)^2 + t22 (1 + t22) + m2 (t12 - t22) (1 + 2 t22)) (1 + \alpha2) - \\
& \quad (-1 + m2 (t12 - t22) + t22) \alpha1 \\
& \quad (1 + p22 + p22 \alpha2 + t22 \alpha2 + m2 ((t12 - t22) \alpha2 + p12 (1 + \alpha2) - p22 (1 + \alpha2))) - \\
& \quad s2 (-1 - 3 t22 - p22 \alpha1 - t22 \alpha1 + p22 t22 \alpha1 + t22^2 \alpha1 - p22 \alpha2 - 3 t22 \alpha2 + p22 t22 \alpha2 - \\
& \quad t22^2 \alpha2 - p22 \alpha1 \alpha2 - t22 \alpha1 \alpha2 + p22 t22 \alpha1 \alpha2 + t22^2 \alpha1 \alpha2 + m2^2 (t12 - t22) \\
& \quad ((t12 - t22) (\alpha1 - \alpha2 + \alpha1 \alpha2) + p12 (\alpha1 + \alpha2 + \alpha1 \alpha2) - p22 (\alpha1 + \alpha2 + \alpha1 \alpha2)) + \\
& \quad m2 (-2 t22^2 (\alpha1 - \alpha2 + \alpha1 \alpha2) - (p12 - p22) (\alpha1 + \alpha2 + \alpha1 \alpha2) + t22 \\
& \quad (3 + (3 + p12 - 2 p22) \alpha2 + (1 + p12 - 2 p22) \alpha1 (1 + \alpha2)) + t12 \\
& \quad (-3 + (-3 + p22 - 2 t22) \alpha2 + (-1 + p22 + 2 t22) \alpha1 (1 + \alpha2)))) / \\
& (2 (1 + s2 t22 + m2 (t12 - t22) (s2 - \alpha1) + \alpha1 - t22 \alpha1) (1 + t22 \alpha2 + \\
& \quad s2 t22 (1 + \alpha2) + m2 (t12 - t22) (s2 + \alpha2 + s2 \alpha2))) , \\
& \frac{1}{4} (-4 dd2 - ((r (1 + s2) (dd2 + dd1 m2 - dd2 m2 + m2 p12 t12 + p22 t22 - m2 p22 t22) \\
& \quad (1 + dd2 + dd1 m2 - dd2 m2 - m2 p12 - p22 + m2 p22 - m2 t12 + \\
& \quad m2 p12 t12 - t22 + m2 t22 + p22 t22 - m2 p22 t22))) / \\
& (1 + s2 t22 + m2 (t12 - t22) (s2 - \alpha1) + \alpha1 - t22 \alpha1) - ((-1 + r) \\
& \quad (dd2 (-1 + m2) - dd1 m2 + m2 p12 + p22 - m2 p22 - m2 p12 t12 - p22 t22 + m2 p22 t22) \\
& \quad (dd2 (-1 + m2) - dd1 m2 + m2 t12 - m2 p12 t12 + t22 - m2 t22 - p22 t22 + m2 p22 t22) \\
& \quad (1 + \alpha1))) / (1 + s2 t22 + m2 (t12 - t22) (s2 - \alpha1) + \alpha1 - t22 \alpha1) - \\
& ((dd2 (-1 + m2) - dd1 m2 + m2 p12 + p22 - m2 p22 - m2 p12 t12 - p22 t22 + m2 p22 t22) \\
& \quad (-1 + dd2 (-1 + m2) - dd1 m2 + m2 p12 + p22 - m2 p22 + m2 t12 - \\
& \quad m2 p12 t12 + t22 - m2 t22 - p22 t22 + m2 p22 t22) (1 + \alpha1)) / \\
& (1 + s2 t22 + m2 (t12 - t22) (s2 - \alpha1) + \alpha1 - t22 \alpha1) + (2 (dd2 + dd1 m2 - \\
& \quad dd2 m2 - m2 p12 - p22 + m2 p22 + m2 p12 t12 + p22 t22 - m2 p22 t22)^2) / \\
& (1 + t22 \alpha2 + s2 t22 (1 + \alpha2) + m2 (t12 - t22) (s2 + \alpha2 + s2 \alpha2)) - \\
& ((dd2 (-1 + m2) - dd1 m2 - m2 p12 t12 - p22 t22 + m2 p22 t22) (dd2 (-1 + m2) - \\
& \quad dd1 m2 + m2 p12 + p22 - m2 p22 - m2 p12 t12 - p22 t22 + m2 p22 t22)) / \\
& (1 + t22 \alpha2 + s2 t22 (1 + \alpha2) + m2 (t12 - t22) (s2 + \alpha2 + s2 \alpha2)) + \\
& (r (dd2 (-1 + m2) - dd1 m2 - m2 p12 t12 - p22 t22 + m2 p22 t22) \\
& \quad (-1 + dd2 (-1 + m2) - dd1 m2 + m2 p12 + p22 - m2 p22 + m2 t12 - \\
& \quad m2 p12 t12 + t22 - m2 t22 - p22 t22 + m2 p22 t22)) / \\
& (1 + t22 \alpha2 + s2 t22 (1 + \alpha2) + m2 (t12 - t22) (s2 + \alpha2 + s2 \alpha2)) - \\
& ((dd2 (-1 + m2) - dd1 m2 + m2 p12 + p22 - m2 p22 - m2 p12 t12 - p22 t22 + m2 p22 t22) \\
& \quad (-1 + dd2 (-1 + m2) - dd1 m2 + m2 p12 + p22 - m2 p22 + m2 t12 - \\
& \quad m2 p12 t12 + t22 - m2 t22 - p22 t22 + m2 p22 t22)) / \\
& (1 + t22 \alpha2 + s2 t22 (1 + \alpha2) + m2 (t12 - t22) (s2 + \alpha2 + s2 \alpha2)) - \\
& ((1 + s2) (dd2 + dd1 m2 - dd2 m2 + m2 p12 t12 + p22 t22 - m2 p22 t22) (dd2 + dd1 m2 - \\
& \quad dd2 m2 - m2 p12 - p22 + m2 p22 + m2 p12 t12 + p22 t22 - m2 p22 t22) (1 + \alpha2)) / \\
& (1 + t22 \alpha2 + s2 t22 (1 + \alpha2) + m2 (t12 - t22) (s2 + \alpha2 + s2 \alpha2)) - \\
& ((-1 + r) (1 + s2) (dd2 + dd1 m2 - dd2 m2 - m2 p12 - p22 + m2 p22 +
\end{aligned}$$

$$\begin{aligned}
& \frac{m2 p12 t12 + p22 t22 - m2 p22 t22}{(1 + t22 \alpha2 + s2 t22 (1 + \alpha2) + m2 (t12 - t22) (s2 + \alpha2 + s2 \alpha2))} \left( \frac{dd2 + dd1 m2 - dd2 m2 - m2 t12 + m2 p12 t12 - t22 + m2 t22 + p22 t22 - m2 p22 t22}{(1 + \alpha2)} \right) / \\
& \left( - \left( (1 + s2) (dd2 + dd1 m2 - dd2 m2 + m2 p12 t12 + p22 t22 - m2 p22 t22) (dd2 + dd1 m2 - dd2 m2 - m2 t12 + m2 p12 t12 - t22 + m2 t22 + p22 t22 - m2 p22 t22) \right) / \right. \\
& \quad \left( 1 + s2 t22 + m2 (t12 - t22) (s2 - \alpha1) + \alpha1 - t22 \alpha1 \right) + \\
& \quad \left( 2 (1 + s2) (dd2 + dd1 m2 - dd2 m2 - m2 t12 + m2 p12 t12 - t22 + m2 t22 + p22 t22 - m2 p22 t22)^2 \right) / \left( 1 + s2 t22 + m2 (t12 - t22) (s2 - \alpha1) + \alpha1 - t22 \alpha1 \right) + \\
& \quad \left( r (1 + s2) (dd2 + dd1 m2 - dd2 m2 + m2 p12 t12 + p22 t22 - m2 p22 t22) \right. \\
& \quad \left. (1 + dd2 + dd1 m2 - dd2 m2 - m2 p12 - p22 + m2 p22 - m2 t12 + m2 p12 t12 - t22 + m2 t22 + p22 t22 - m2 p22 t22) \right) / \\
& \quad \left( 1 + s2 t22 + m2 (t12 - t22) (s2 - \alpha1) + \alpha1 - t22 \alpha1 \right) - \\
& \quad \left( (1 + s2) (dd2 (-1 + m2) - dd1 m2 + m2 t12 - m2 p12 t12 + t22 - m2 t22 - p22 t22 + m2 p22 t22) (-1 + dd2 (-1 + m2) - dd1 m2 + m2 p12 + p22 - m2 p22 + m2 t12 - m2 p12 t12 + t22 - m2 t22 - p22 t22 + m2 p22 t22) \right) / \\
& \quad \left( 1 + s2 t22 + m2 (t12 - t22) (s2 - \alpha1) + \alpha1 - t22 \alpha1 \right) - ((-1 + r) (dd2 (-1 + m2) - dd1 m2 + m2 p12 + p22 - m2 p22 - m2 p12 t12 - p22 t22 + m2 p22 t22) (dd2 (-1 + m2) - dd1 m2 + m2 t12 - m2 p12 t12 + t22 - m2 t22 - p22 t22 + m2 p22 t22) (1 + \alpha1)) / \left( 1 + s2 t22 + m2 (t12 - t22) (s2 - \alpha1) + \alpha1 - t22 \alpha1 \right) - \\
& \quad \left( (dd2 (-1 + m2) - dd1 m2 + m2 t12 - m2 p12 t12 + t22 - m2 t22 - p22 t22 + m2 p22 t22) (-1 + dd2 (-1 + m2) - dd1 m2 + m2 p12 + p22 - m2 p22 + m2 t12 - m2 p12 t12 + t22 - m2 t22 - p22 t22 + m2 p22 t22) (1 + \alpha1) \right) / \left( 1 + s2 t22 + m2 (t12 - t22) (s2 - \alpha1) + \alpha1 - t22 \alpha1 \right) + \\
& \quad \left( r (dd2 (-1 + m2) - dd1 m2 - m2 p12 t12 - p22 t22 + m2 p22 t22) (-1 + dd2 (-1 + m2) - dd1 m2 + m2 p12 + p22 - m2 p22 + m2 t12 - m2 p12 t12 + t22 - m2 t22 - p22 t22 + m2 p22 t22) \right) / \left( 1 + t22 \alpha2 + s2 t22 (1 + \alpha2) + m2 (t12 - t22) (s2 + \alpha2 + s2 \alpha2) \right) - \\
& \quad \left( (1 + s2) (dd2 + dd1 m2 - dd2 m2 + m2 p12 t12 + p22 t22 - m2 p22 t22) (dd2 + dd1 m2 - dd2 m2 - m2 t12 + m2 p12 t12 - t22 + m2 t22 + p22 t22 - m2 p22 t22) (1 + \alpha2) \right) / \left( 1 + t22 \alpha2 + s2 t22 (1 + \alpha2) + m2 (t12 - t22) (s2 + \alpha2 + s2 \alpha2) \right) - \\
& \quad \left( (-1 + r) (1 + s2) (dd2 + dd1 m2 - dd2 m2 - m2 p12 - p22 + m2 p22 + m2 p12 t12 + p22 t22 - m2 p22 t22) (dd2 + dd1 m2 - dd2 m2 - m2 t12 + m2 p12 t12 - t22 + m2 t22 + p22 t22 - m2 p22 t22) (1 + \alpha2) \right) / \left( 1 + t22 \alpha2 + s2 t22 (1 + \alpha2) + m2 (t12 - t22) (s2 + \alpha2 + s2 \alpha2) \right) + \\
& \quad \left( - \left( (-1 + r) (1 + s2) (dd2 + dd1 m2 - dd2 m2 + m2 p12 t12 + p22 t22 - m2 p22 t22) (1 + dd2 + dd1 m2 - dd2 m2 - m2 p12 - p22 + m2 p22 - m2 t12 + m2 p12 t12 - t22 + m2 t22 + p22 t22 - m2 p22 t22) \right) / \left( 1 + s2 t22 + m2 (t12 - t22) (s2 - \alpha1) + \alpha1 - t22 \alpha1 \right) - \right. \\
& \quad \left( (1 + s2) (dd2 (-1 + m2) - dd1 m2 + m2 t12 - m2 p12 t12 + t22 - m2 t22 - p22 t22 + m2 p22 t22) (-1 + dd2 (-1 + m2) - dd1 m2 + m2 p12 + p22 - m2 p22 + m2 t12 - m2 p12 t12 + t22 - m2 t22 - p22 t22 + m2 p22 t22) \right) / \left( 1 + s2 t22 + m2 (t12 - t22) (s2 - \alpha1) + \alpha1 - t22 \alpha1 \right) + \\
& \quad \left( r (dd2 (-1 + m2) - dd1 m2 + m2 p12 + p22 - m2 p22 - m2 p12 t12 - p22 t22 + m2 p22 t22) (dd2 (-1 + m2) - dd1 m2 + m2 t12 - m2 p12 t12 + t22 - m2 t22 - p22 t22 + m2 p22 t22) (1 + \alpha1) \right) / \left( 1 + s2 t22 + m2 (t12 - t22) (s2 - \alpha1) + \alpha1 - t22 \alpha1 \right) - \\
& \quad \left( (dd2 (-1 + m2) - dd1 m2 + m2 p12 + p22 - m2 p22 - m2 p12 t12 - p22 t22 + m2 p22 t22) (-1 + dd2 (-1 + m2) - dd1 m2 + m2 p12 + p22 - m2 p22 + m2 t12 - m2 p12 t12 + t22 - m2 t22 - p22 t22 + m2 p22 t22) (1 + \alpha1) \right) / \left( 1 + s2 t22 + m2 (t12 - t22) (s2 - \alpha1) + \alpha1 - t22 \alpha1 \right) -
\end{aligned}$$



## 2.2.2 Structure of equilibrium conditions and reduction to two conditions

`Coefficient[deltagenmale[[1]], r]`

0

`Coefficient[deltagenmale[[2]], r]`

0

`Exponent[deltagenmale[[3]], r]`

2

This is not true because:

`Factor[Coefficient[deltagenmale[[3]], r, 2]]`

0

The recombination rate  $r$  occurs only linearly in `deltagenmale[[3]]` and `deltagenmale[[6]]`.

The following gives the structure of the (numerator of the) components of `deltagenmale`

`Exponent[Numerator[Factor[deltagenmale[[1]]]], {p12, t12, dd1, p22, t22, dd2}]`

{2, 2, 1, 2, 2, 1}

`Exponent[Numerator[Factor[deltagenmale[[2]]]], {p12, t12, dd1, p22, t22, dd2}]`

{1, 3, 0, 1, 3, 0}

`Exponent[Numerator[Factor[deltagenmale[[3]]]], {p12, t12, dd1, p22, t22, dd2}]`

{3, 5, 2, 3, 5, 2}

`Exponent[Numerator[Factor[deltagenmale[[4]]]], {p12, t12, dd1, p22, t22, dd2}]`

{2, 2, 1, 2, 2, 1}

`Exponent[Numerator[Factor[deltagenmale[[5]]]], {p12, t12, dd1, p22, t22, dd2}]`

{1, 3, 0, 1, 3, 0}

`Exponent[Numerator[Factor[deltagenmale[[6]]]], {p12, t12, dd1, p22, t22, dd2}]`

{3, 5, 2, 3, 5, 2}

Therefore, `deltagenmale[[2]]` and `deltagenmale[[5]]` can be used to compute  $p_{12}$  and  $p_{22}$  (at equilibrium) as functions of  $(t_{12}, t_{22})$ :

**Simplify[Solve[{deltagenmale[[2]], deltagenmale[[5]]} == 0, {p12, p22}]]**

$$\begin{aligned} \{ \{ p12 \rightarrow - \left( \left( (-1+m2) (1+s2) (-1+m2 (t12-t22) + t22) \right. \right. \\ \left. \left. (m2 (t12-t22) + t22) \left( -(-1+t12) t12 (s1+\alpha1+s1 \alpha1) + \right. \right. \right. \\ \left. \left. \left. m1^2 (t12-t22)^2 (s1+\alpha1+s1 \alpha1) + m1 (t12-t22) (2+s1+\alpha1+s1 \alpha1) \right) \right) - \right. \\ \left. m1 (1+s1) \left( (-1+m1) t12 - m1 t22 \right) (1+(-1+m1) t12 - m1 t22) \right. \\ \left. \left( m2^2 (t12-t22)^2 (s2-\alpha1) - (-1+t22) t22 (s2-\alpha1) + m2 (t12-t22) (2+s2+\alpha1) \right) \right. \\ \left. \left( 1+t22 \alpha2 + s2 t22 (1+\alpha2) + m2 (t12-t22) (s2+\alpha2+s2 \alpha2) \right) \right) / \left( (-1+m1+m2) \right. \\ \left. (1+s1) (1+s2) \left( m2^2 (t12-t22)^2 + (-1+t22) t22 + m2 (t12-t22) (-1+2 t22) \right) \right. \\ \left. \left( (-1+m1)^2 t12^2 + m1 t22 (-1+m1 t22) - (-1+m1) t12 (-1+2 m1 t22) \right) \right. \\ \left. \left. \left. (\alpha1+\alpha2+\alpha1 \alpha2) \right) \right) \right\}, \\ p22 \rightarrow - \left( \left( \left( -(-1+t12) t12 (s1+\alpha1+s1 \alpha1) + m1^2 (t12-t22)^2 (s1+\alpha1+s1 \alpha1) + \right. \right. \right. \\ \left. \left. \left. m1 (t12-t22) (2+s1+\alpha1+s1 \alpha1) \right) \right) \right. \\ \left. \left( 1+s1+(-1+m1) s1 t12 - m1 s1 t22 + m1 t22 \alpha2 + t12 (\alpha2 - m1 \alpha2) \right) + \right. \\ \left. \left( (-1+m1) \left( (-1+m2) (1+s2) (-1+m2 (t12-t22) + t22) \right. \right. \right. \\ \left. \left. \left. (m2 (t12-t22) + t22) \left( -(-1+t12) t12 (s1+\alpha1+s1 \alpha1) + \right. \right. \right. \right. \\ \left. \left. \left. \left. m1^2 (t12-t22)^2 (s1+\alpha1+s1 \alpha1) + m1 (t12-t22) (2+s1+\alpha1+s1 \alpha1) \right) \right) - \right. \right. \\ \left. \left. m1 (1+s1) \left( (-1+m1) t12 - m1 t22 \right) (1+(-1+m1) t12 - m1 t22) \right) \left( m2^2 (t12-t22)^2 \right. \right. \\ \left. \left. (s2-\alpha1) - (-1+t22) t22 (s2-\alpha1) + m2 (t12-t22) (2+s2+\alpha1) \right) \right) (1+ \\ \left. t22 \alpha2 + s2 t22 (1+\alpha2) + m2 (t12-t22) (s2+\alpha2+s2 \alpha2) \right) \right) / \left( (-1+m1+m2) \right. \\ \left. (1+s2) \left( m2^2 (t12-t22)^2 + (-1+t22) t22 + m2 (t12-t22) (-1+2 t22) \right) \right) / \\ \left( m1 (1+s1) \left( (-1+m1)^2 t12^2 + m1 t22 (-1+m1 t22) - (-1+m1) t12 (-1+2 m1 t22) \right) \right. \\ \left. \left. \left. (\alpha1+\alpha2+\alpha1 \alpha2) \right) \right) \right\} \} \end{aligned}$$

The following is (p12, p22) as a function of (t12, t22); it is independent of r and of (dd1, dd2):

```

p12p22genmt12 =
{p12 → - (( (-1 + m2) (1 + s2) (-1 + m2 (t12 - t22) + t22) (m2 (t12 - t22) + t22)
  (- (-1 + t12) t12 (s1 + α1 + s1 α1) + m1^2 (t12 - t22)^2 (s1 + α1 + s1 α1) +
  m1 (t12 - t22) (2 + s1 + α1 + s1 α1))
  (1 + s1 + (-1 + m1) s1 t12 - m1 s1 t22 + m1 t22 α2 + t12 (α2 - m1 α2)) -
  m1 (1 + s1) ((-1 + m1) t12 - m1 t22) (1 + (-1 + m1) t12 - m1 t22) (m2^2
  (t12 - t22)^2 (s2 - α1) - (-1 + t22) t22 (s2 - α1) + m2 (t12 - t22) (2 + s2 + α1))
  (1 + t22 α2 + s2 t22 (1 + α2) + m2 (t12 - t22) (s2 + α2 + s2 α2))) /
  ((-1 + m1 + m2) (1 + s1) (1 + s2) (m2^2 (t12 - t22)^2 + (-1 + t22) t22 +
  m2 (t12 - t22) (-1 + 2 t22)) ((-1 + m1)^2 t12^2 + m1 t22 (-1 + m1 t22) -
  (-1 + m1) t12 (-1 + 2 m1 t22)) (α1 + α2 + α1 α2)) ),
p22 → - (( (-1 + t12) t12 (s1 + α1 + s1 α1) + m1^2 (t12 - t22)^2 (s1 + α1 + s1 α1) +
  m1 (t12 - t22) (2 + s1 + α1 + s1 α1))
  (1 + s1 + (-1 + m1) s1 t12 - m1 s1 t22 + m1 t22 α2 + t12 (α2 - m1 α2)) +
  ((-1 + m1) ((-1 + m2) (1 + s2) (-1 + m2 (t12 - t22) + t22) (m2 (t12 - t22) + t22)
  (- (-1 + t12) t12 (s1 + α1 + s1 α1) + m1^2 (t12 - t22)^2 (s1 + α1 + s1 α1) +
  m1 (t12 - t22) (2 + s1 + α1 + s1 α1)) (1 + s1 + (-1 + m1) s1 t12 - m1 s1 t22 +
  m1 t22 α2 + t12 (α2 - m1 α2)) - m1 (1 + s1) ((-1 + m1) t12 - m1 t22)
  (1 + (-1 + m1) t12 - m1 t22) (m2^2 (t12 - t22)^2 (s2 - α1) - (-1 + t22) t22
  (s2 - α1) + m2 (t12 - t22) (2 + s2 + α1)) (1 + t22 α2 + s2 t22 (1 + α2) +
  m2 (t12 - t22) (s2 + α2 + s2 α2)))) / ((-1 + m1 + m2) (1 + s2)
  (m2^2 (t12 - t22)^2 + (-1 + t22) t22 + m2 (t12 - t22) (-1 + 2 t22))) /
  (m1 (1 + s1) ((-1 + m1)^2 t12^2 + m1 t22 (-1 + m1 t22) - (-1 + m1) t12 (-1 + 2 m1 t22))
  (α1 + α2 + α1 α2)) );

```

The structure of deltagenmale (see above) suggests that we can obtain (dd1, dd2) as functions of (t12, t22) by solving {deltagensym[[1]], deltagensym[[4]]} = 0:

```
delm1 = Factor[deltagenmale[[1]] /. p12p22genmt12];
```

```
Exponent[Numerator[delm1], {t12, t22, dd1, dd2}]
```

```
{7, 7, 1, 1}
```

```
delm4 = Factor[deltagenmale[[4]] /. p12p22genmt12];
```

```
Exponent[Numerator[delm4], {t12, t22, dd1, dd2}]
```

```
{7, 7, 1, 1}
```

```
Simplify[Solve[{delm1, delm4} == 0, {dd1, dd2}]]
```

The following is (dd1, dd2) as a function of (t12, t22); it is independent of r:

```

dd12genmt12 =
{dd1 → - (( (-1 + t12) t12 (m2^3 (1 + s1) (t12 - t22)^3 ((-1 + m1)^2 t12^2 + m1 t22 (-1 + m1 t22) -
  (-1 + m1) t12 (-1 + 2 m1 t22)) (s2 - α1) (s2 + α2 + s2 α2) -

```

$$\begin{aligned}
& (-1 + t_{22}) t_{22} \left( -m_1^3 (1 + s_2) (t_{12} - t_{22})^3 (s_1 + \alpha_1 + s_1 \alpha_1) (s_1 - \alpha_2) + \right. \\
& m_1^2 (t_{12} - t_{22})^2 (-2 \alpha_1 + s_1^2 (1 + s_2) (-2 + t_{12}) (1 + \alpha_1) + 2 \alpha_2 + \alpha_1 \alpha_2 - \\
& t_{12} \alpha_1 \alpha_2 - t_{22} \alpha_1 \alpha_2 + s_2^2 t_{22} (1 + \alpha_2) + s_2 (1 + (2 + t_{22}) \alpha_2 - \\
& \alpha_1 (1 + t_{22} - \alpha_2 + t_{12} \alpha_2 + t_{22} \alpha_2)) + s_1 (-3 + \alpha_2 - t_{12} \alpha_2 + \\
& s_2^2 t_{22} (1 + \alpha_2) + \alpha_1 (-4 + t_{12} + \alpha_2 - t_{12} \alpha_2 - t_{22} \alpha_2) + s_2 (-2 + \alpha_2 - \\
& t_{12} \alpha_2 + t_{22} \alpha_2 - \alpha_1 (3 + t_{22} + t_{12} (-1 + \alpha_2) - \alpha_2 + t_{22} \alpha_2))) - \\
& (-1 + t_{12}) t_{12} (s_1^2 (1 + s_2) (-1 + t_{12}) (1 + \alpha_1) + (-t_{12} + t_{22}) \alpha_1 \alpha_2 - \\
& s_2^2 t_{22} (1 + \alpha_2) + s_2 (-1 - t_{22} \alpha_2 + \alpha_1 (-1 + t_{22} - t_{12} \alpha_2 + t_{22} \alpha_2)) - \\
& s_1 (1 + t_{12} \alpha_2 + s_2^2 t_{22} (1 + \alpha_2) + \alpha_1 (1 + t_{12} (-1 + \alpha_2) - t_{22} \alpha_2) + \\
& s_2 (2 + t_{12} \alpha_2 + t_{22} \alpha_2 - \alpha_1 (-2 + t_{12} + t_{22} - t_{12} \alpha_2 + t_{22} \alpha_2))) + \\
& m_1 (t_{12} - t_{22}) (-2 - 2 \alpha_1 + 2 t_{12} \alpha_1 + s_1^2 (1 + s_2) (-1 + t_{12}^2) (1 + \alpha_1) - \\
& 2 t_{12} \alpha_2 - t_{12}^2 \alpha_1 \alpha_2 - t_{22} \alpha_1 \alpha_2 + 2 t_{12} t_{22} \alpha_1 \alpha_2 - s_2^2 (-1 + 2 t_{12}) \\
& t_{22} (1 + \alpha_2) - s_2 (1 - t_{22} \alpha_2 + t_{12}^2 \alpha_1 \alpha_2 + \alpha_1 (1 + t_{22} + t_{22} \alpha_2) + \\
& 2 t_{12} (1 + \alpha_2 - t_{22} (\alpha_1 - \alpha_2 + \alpha_1 \alpha_2))) - s_1 (3 + 3 \alpha_1 + t_{22} \alpha_1 \alpha_2 + \\
& s_2^2 (-1 + 2 t_{12}) t_{22} (1 + \alpha_2) + t_{12}^2 (\alpha_1 (-1 + \alpha_2) + \alpha_2) - \\
& 2 t_{12} (1 + \alpha_1 + t_{22} \alpha_1 \alpha_2) + s_2 (2 + t_{12}^2 \alpha_2 - t_{22} \alpha_2 + 2 t_{12} t_{22} \alpha_2 + \\
& \alpha_1 (2 + t_{22} + t_{12}^2 (-1 + \alpha_2) + t_{22} \alpha_2 - 2 t_{12} t_{22} (1 + \alpha_2)))) + \\
& m_2^2 (t_{12} - t_{22})^2 \left( m_1^3 (1 + s_2) (t_{12} - t_{22})^3 (s_1 + \alpha_1 + s_1 \alpha_1) (s_1 - \alpha_2) + \right. \\
& (-1 + t_{12}) t_{12} (-2 \alpha_1 + s_1^2 (1 + s_2) (-1 + t_{12}) (1 + \alpha_1) + 2 \alpha_2 + \alpha_1 \alpha_2 - \\
& t_{12} \alpha_1 \alpha_2 - t_{22} \alpha_1 \alpha_2 + s_2^2 (1 + t_{22}) (1 + \alpha_2) + s_2 (3 + (3 + \alpha_1 - t_{12} \alpha_1) \alpha_2 - \\
& t_{22} (\alpha_1 - \alpha_2 + \alpha_1 \alpha_2)) + s_1 (-1 + 2 \alpha_2 - t_{12} \alpha_2 + s_2^2 (1 + t_{22}) (1 + \alpha_2) + \\
& \alpha_1 (-3 + t_{12} + \alpha_2 - t_{12} \alpha_2 - t_{22} \alpha_2) - s_2 (-2 + (-3 + t_{12} - t_{22}) \alpha_2 + \\
& \alpha_1 (1 + t_{22} + t_{12} (-1 + \alpha_2) - \alpha_2 + t_{22} \alpha_2))) - m_1^2 (t_{12} - t_{22})^2 \\
& (s_1^2 (1 + s_2) (-2 + t_{12}) (1 + \alpha_1) + (-t_{12} + t_{22}) \alpha_1 \alpha_2 - s_2^2 (1 + t_{22}) \\
& (1 + \alpha_2) + s_2 (-3 - (1 + t_{22}) \alpha_2 + \alpha_1 (-2 + t_{22} - t_{12} \alpha_2 + t_{22} \alpha_2)) - s_1 \\
& (3 + \alpha_2 + t_{12} \alpha_2 + s_2^2 (1 + t_{22}) (1 + \alpha_2) + \alpha_1 (2 + t_{12} (-1 + \alpha_2) - t_{22} \alpha_2) + \\
& s_2 (6 + (2 + t_{12} + t_{22}) \alpha_2 - \alpha_1 (-4 + t_{12} + t_{22} - t_{12} \alpha_2 + t_{22} \alpha_2))) - \\
& m_1 (t_{12} - t_{22}) (-2 - 2 t_{12} \alpha_1 + s_1^2 (1 + s_2) (-1 + t_{12}^2) (1 + \alpha_1) - \\
& 2 \alpha_2 + 2 t_{12} \alpha_2 - \alpha_1 \alpha_2 + 2 t_{12} \alpha_1 \alpha_2 - t_{12}^2 \alpha_1 \alpha_2 + t_{22} \alpha_1 \alpha_2 - \\
& 2 t_{12} t_{22} \alpha_1 \alpha_2 + s_2^2 (-1 + 2 t_{12}) (1 + t_{22}) (1 + \alpha_2) - \\
& s_2 (5 + 3 \alpha_2 + t_{22} \alpha_2 + t_{12}^2 \alpha_1 \alpha_2 + \alpha_1 (2 + \alpha_2 - t_{22} (1 + \alpha_2)) + \\
& 2 t_{12} (-3 - (2 + t_{22}) \alpha_2 + (-1 + t_{22}) \alpha_1 (1 + \alpha_2))) + \\
& s_1 (-3 - \alpha_1 - 2 \alpha_2 - \alpha_1 \alpha_2 + t_{22} \alpha_1 \alpha_2 + s_2^2 (-1 + 2 t_{12}) \\
& (1 + t_{22}) (1 + \alpha_2) - t_{12}^2 (\alpha_1 (-1 + \alpha_2) + \alpha_2) - \\
& 2 t_{12} (-1 + \alpha_1 - 2 \alpha_2 + (-1 + t_{22}) \alpha_1 \alpha_2) - s_2 (6 + 3 \alpha_2 + t_{22} \alpha_2 + \\
& t_{12}^2 (\alpha_1 (-1 + \alpha_2) + \alpha_2) + \alpha_1 (3 + \alpha_2 - t_{22} (1 + \alpha_2)) + 2 t_{12} \\
& (-4 - (3 + t_{22}) \alpha_2 + (-1 + t_{22}) \alpha_1 (1 + \alpha_2)))) + m_2 (t_{12} - t_{22}) \\
& \left( (-1 + m_1)^2 (1 + m_1) (1 + s_2) t_{12}^3 (-1 + 2 t_{22}) (s_1 + \alpha_1 + s_1 \alpha_1) (s_1 - \alpha_2) + \right. \\
& m_1 t_{22} (s_2 - 4 t_{22} + 2 m_1 t_{22} - 6 s_2 t_{22} + m_1 s_2 t_{22} - 2 s_2^2 t_{22} + 2 m_1 s_2 t_{22}^2 + \\
& s_2^2 t_{22}^2 + 2 m_1 s_2^2 t_{22}^2 - m_1 s_2^2 t_{22}^3 + s_2 \alpha_1 - 2 t_{22} \alpha_1 - 2 s_2 t_{22} \alpha_1 - \\
& m_1 s_2 t_{22} \alpha_1 + 2 m_1 t_{22}^2 \alpha_1 - s_2 t_{22}^2 \alpha_1 + 2 m_1 s_2 t_{22}^2 \alpha_1 + m_1 s_2 t_{22}^3 \alpha_1 - \\
& s_1^2 (1 + s_2) (-1 + 2 t_{22}) (-1 + m_1 t_{22})^2 (1 + \alpha_1) - 2 t_{22} \alpha_2 + 2 m_1 t_{22} \alpha_2 - \\
& 4 s_2 t_{22} \alpha_2 + 2 m_1 s_2 t_{22} \alpha_2 - 2 s_2^2 t_{22} \alpha_2 - 2 m_1 t_{22}^2 \alpha_2 + s_2 t_{22}^2 \alpha_2 + \\
& s_2^2 t_{22}^2 \alpha_2 + 2 m_1 s_2^2 t_{22}^2 \alpha_2 - m_1 s_2 t_{22}^3 \alpha_2 - m_1 s_2^2 t_{22}^3 \alpha_2 + \\
& m_1 t_{22} \alpha_1 \alpha_2 + m_1 s_2 t_{22} \alpha_1 \alpha_2 - t_{22}^2 \alpha_1 \alpha_2 - 2 m_1 t_{22}^2 \alpha_1 \alpha_2 - \\
& m_1^2 t_{22}^2 \alpha_1 \alpha_2 - s_2 t_{22}^2 \alpha_1 \alpha_2 - 2 m_1 s_2 t_{22}^2 \alpha_1 \alpha_2 - m_1^2 s_2 t_{22}^2 \alpha_1 \alpha_2 + \\
& m_1 t_{22}^3 \alpha_1 \alpha_2 + 2 m_1^2 t_{22}^3 \alpha_1 \alpha_2 + m_1 s_2 t_{22}^3 \alpha_1 \alpha_2 + 2 m_1^2 s_2 t_{22}^3 \alpha_1 \alpha_2 + \\
& s_1 (-1 + m_1 t_{22}) (-1 - \alpha_1 - s_2^2 (-2 + t_{22}) t_{22} (1 + \alpha_2) + t_{22}^2 (\alpha_1 \alpha_2 + 2 m_1 \\
& (\alpha_1 (-1 + \alpha_2) + \alpha_2)) + t_{22} (6 + 2 \alpha_2 - m_1 \alpha_2 + \alpha_1 (4 + m_1 - m_1 \alpha_2))) +
\end{aligned}$$



$$\begin{aligned} & s2 \left( -2 \left( 1 + \alpha1 \right) + t22^2 \left( \left( -1 + 2 m1 \right) \alpha2 + \alpha1 \left( 1 + 2 m1 \left( -1 + \alpha2 \right) + \alpha2 \right) \right) \right) + \\ & t22 \left( 8 + 4 \alpha2 - m1 \alpha2 + \alpha1 \left( 4 + m1 - m1 \alpha2 \right) \right) \Big) + \\ t12 & \left( -2 + 8 m1 t22 - 4 m1^2 t22 - 2 \alpha1 + 2 t22 \alpha1 + 4 m1 t22 \alpha1 - 4 m1^2 t22^2 \alpha1 + \right. \\ & s1^2 \left( 1 + s2 \right) \left( -1 + 2 t22 \right) \left( 1 + m1 + 3 m1^3 t22^2 - m1^2 t22 \left( 4 + t22 \right) \right) \left( 1 + \alpha1 \right) - \\ & 2 t22 \alpha2 + 4 m1 t22 \alpha2 - 4 m1^2 t22 \alpha2 + 4 m1^2 t22^2 \alpha2 - 2 m1^2 t22 \alpha1 \alpha2 - t22^2 \\ & \alpha1 \alpha2 + m1 t22^2 \alpha1 \alpha2 + 3 m1^2 t22^2 \alpha1 \alpha2 + 3 m1^3 t22^2 \alpha1 \alpha2 + 2 m1 t22^3 \alpha1 \alpha2 - \\ & 6 m1^3 t22^3 \alpha1 \alpha2 + \left( -1 + m1 \right) s2^2 \left( -2 + t22 \right) t22 \left( -1 + 2 m1 t22 \right) \left( 1 + \alpha2 \right) - \\ & s2 \left( 1 + \alpha1 + 3 m1^3 t22^2 \left( -1 + 2 t22 \right) \alpha1 \alpha2 + t22 \left( 2 - 2 \alpha1 + 4 \alpha2 \right) + \right. \\ & m1^2 t22 \left( 2 + t22 \left( 4 + \alpha1 \left( 4 - 3 \alpha2 \right) \right) + 2 t22^2 \left( \alpha1 - \alpha2 \right) + 2 \alpha1 \left( -1 + \alpha2 \right) + \right. \\ & 4 \alpha2 \left. \right) + t22^2 \left( \alpha1 - \alpha2 + \alpha1 \alpha2 \right) - m1 \left( -1 - \alpha1 + 2 t22 \left( 4 + \alpha1 + 3 \alpha2 \right) + \right. \\ & 2 t22^3 \left( \alpha1 - \alpha2 + \alpha1 \alpha2 \right) + t22^2 \left( 4 + \alpha1 + 3 \alpha2 + \alpha1 \alpha2 \right) \Big) \Big) + \\ s1 & \left( -3 + 2 t22 - 3 \alpha1 + 4 t22 \alpha1 - 2 t22 \alpha2 - t22^2 \alpha1 \alpha2 + s2^2 \left( -2 + t22 \right) \right. \\ & t22 \left( 1 + \alpha2 \right) - 3 m1^3 \left( 1 + s2 \right) t22^2 \left( -1 + 2 t22 \right) \left( \alpha1 \left( -1 + \alpha2 \right) + \alpha2 \right) - \\ & s2 \left( 2 + 4 t22 \alpha2 - t22^2 \alpha2 + \alpha1 \left( 2 - 4 t22 + t22^2 \left( 1 + \alpha2 \right) \right) \right) + \\ & m1^2 t22 \left( -2 t22^2 \left( \alpha1 - \alpha2 \right) + 2 s2^2 \left( -2 + t22 \right) t22 \left( 1 + \alpha2 \right) - \right. \\ & 2 \left( -1 + \alpha1 \left( -2 + \alpha2 \right) + \alpha2 \right) + t22 \left( -12 - \alpha2 + \alpha1 \left( -11 + 3 \alpha2 \right) \right) - \\ & s2 \left( 4 t22^2 \left( \alpha1 - \alpha2 \right) + 2 \left( -2 + \alpha1 \left( -3 + \alpha2 \right) + \alpha2 \right) + \right. \\ & t22 \left( 16 + \alpha1 \left( 11 - 3 \alpha2 \right) + 5 \alpha2 \right) \Big) \Big) + m1 \left( -1 - \alpha1 + 2 t22^3 \alpha1 \alpha2 - \right. \\ & s2^2 t22 \left( -2 - 3 t22 + 2 t22^2 \right) \left( 1 + \alpha2 \right) + 2 t22 \left( 4 + 3 \alpha1 + \alpha2 \right) + \\ & t22^2 \left( 4 + \left( 4 + \alpha1 \right) \alpha2 \right) + s2 \left( -2 \left( 1 + \alpha1 \right) + 4 t22 \left( 2 + \alpha1 + \alpha2 \right) + \right. \\ & 2 t22^3 \left( \alpha1 - \alpha2 + \alpha1 \alpha2 \right) + t22^2 \left( 8 + \alpha1 + 7 \alpha2 + \alpha1 \alpha2 \right) \Big) \Big) \Big) - \\ & \left( -1 + m1 \right) t12^2 \left( 2 + s2 + 2 s2 t22 + 2 s2^2 t22 - s2^2 t22^2 + 2 \alpha1 + s2 \alpha1 - \right. \\ & 2 t22 \alpha1 - 2 s2 t22 \alpha1 + s2 t22^2 \alpha1 - 2 s1^2 \left( 1 + s2 \right) \left( -1 + 2 t22 \right) \left( 1 + \alpha1 \right) + \\ & 3 m1^2 \left( 1 + s2 \right) t22 \left( -1 + 2 t22 \right) \left( s1 + \alpha1 + s1 \alpha1 \right) \left( s1 - \alpha2 \right) + 2 t22 \alpha2 + \\ & 4 s2 t22 \alpha2 + 2 s2^2 t22 \alpha2 - s2 t22^2 \alpha2 - s2^2 t22^2 \alpha2 - \alpha1 \alpha2 - \\ & s2 \alpha1 \alpha2 + 2 t22 \alpha1 \alpha2 + 2 s2 t22 \alpha1 \alpha2 + t22^2 \alpha1 \alpha2 + s2 t22^2 \alpha1 \alpha2 - \\ & s1 \left( -3 - 4 \alpha1 + \alpha2 + \alpha1 \alpha2 - t22^2 \alpha1 \alpha2 + s2^2 \left( -2 + t22 \right) t22 \left( 1 + \alpha2 \right) + \right. \\ & t22 \left( 2 + 6 \alpha1 - 4 \alpha2 - 2 \alpha1 \alpha2 \right) + s2 \left( -2 + \alpha2 - 6 t22 \alpha2 + \right. \\ & t22^2 \alpha2 - \alpha1 \left( 3 + 2 t22 \left( -3 + \alpha2 \right) - \alpha2 + t22^2 \left( 1 + \alpha2 \right) \right) \Big) \Big) + \\ m1 & \left( -2 - 2 t22 \alpha1 + s1^2 \left( 1 + s2 \right) \left( 2 - 5 t22 + 2 t22^2 \right) \left( 1 + \alpha1 \right) - \right. \\ & 2 \alpha2 + 2 t22 \alpha2 - \alpha1 \alpha2 + 3 t22 \alpha1 \alpha2 - 3 t22^2 \alpha1 \alpha2 + \\ & s2^2 \left( -2 + t22 \right) t22 \left( 1 + \alpha2 \right) - s2 \left( 1 + t22 \left( 2 + \alpha1 \left( 2 - 3 \alpha2 \right) \right) + \right. \\ & \alpha1 \left( -1 + \alpha2 \right) + 2 \alpha2 + t22^2 \left( \alpha1 - \alpha2 + 3 \alpha1 \alpha2 \right) \Big) + s1 \left( 1 + 2 \alpha1 + t22^2 \right. \\ & \left( \alpha1 \left( 2 - 3 \alpha2 \right) - 2 \alpha2 \right) - \alpha2 - \alpha1 \alpha2 + s2^2 \left( -2 + t22 \right) t22 \left( 1 + \alpha2 \right) + \\ & t22 \left( -6 + \alpha2 + \alpha1 \left( -7 + 3 \alpha2 \right) \right) - s2 \left( -2 + \alpha1 \left( -3 + \alpha2 \right) + \alpha2 + t22 \right. \\ & \left. \left( 8 + \alpha1 \left( 7 - 3 \alpha2 \right) + \alpha2 \right) + t22^2 \left( \alpha2 + \alpha1 \left( -1 + 3 \alpha2 \right) \right) \right) \Big) \Big) \Big) \Big) / \\ & \left( \left( -1 + m1 + m2 \right) \left( 1 + s1 \right) \left( 1 + s2 \right) \left( t12 - t22 \right) \left( -1 + m2 \left( t12 - t22 \right) + t22 \right) \right. \\ & \left( m2 \left( t12 - t22 \right) + t22 \right) \\ & \left( \left( -1 + m1 \right) t12 - m1 t22 \right) \\ & \left( 1 + \left( -1 + m1 \right) t12 - m1 t22 \right) \\ & \left. \left( \alpha1 + \alpha2 + \alpha1 \alpha2 \right) \right) \Big), \\ & - \left( \left( \left( -1 + t22 \right) t22 \left( m2^3 \left( 1 + s1 \right) \left( t12 - t22 \right)^3 \left( \left( -1 + m1 \right)^2 t12^2 + m1 t22 \left( -1 + m1 t22 \right) - \right. \right. \right. \right. \right. \right. \\ & \left. \left. \left( -1 + m1 \right) t12 \left( -1 + 2 m1 t22 \right) \right) \right) \left( s2 - \alpha1 \right) \left( s2 + \alpha2 + s2 \alpha2 \right) - \\ & \left( -1 + t22 \right) t22 \left( -m1^3 \left( 1 + s2 \right) \left( t12 - t22 \right)^3 \left( s1 + \alpha1 + s1 \alpha1 \right) \left( s1 - \alpha2 \right) + \right. \\ & m1^2 \left( t12 - t22 \right)^2 \left( -2 \alpha1 + s1^2 \left( 1 + s2 \right) \left( -2 + t12 \right) \left( 1 + \alpha1 \right) + \right. \\ & 2 \alpha2 + \alpha1 \alpha2 - t12 \alpha1 \alpha2 - t22 \alpha1 \alpha2 + s2^2 t22 \left( 1 + \alpha2 \right) + \\ & s2 \left( 1 + \left( 2 + t22 \right) \alpha2 - \alpha1 \left( 1 + t22 - \alpha2 + t12 \alpha2 + t22 \alpha2 \right) \right) + \\ & s1 \left( -3 + \alpha2 - t12 \alpha2 + s2^2 t22 \left( 1 + \alpha2 \right) + \right. \\ & \left. \left. \alpha1 \left( -4 + t12 + \alpha2 - t12 \alpha2 - t22 \alpha2 \right) + s2 \left( -2 + \alpha2 - t12 \alpha2 + \right. \right. \right. \right. \end{aligned}$$

$$\begin{aligned}
& t_{22} \alpha_2 - \alpha_1 (3 + t_{22} + t_{12} (-1 + \alpha_2) - \alpha_2 + t_{22} \alpha_2) \Big) \Big) - \\
& (-1 + t_{12}) t_{12} (s_1^2 (1 + s_2) (-1 + t_{12}) (1 + \alpha_1) + (-t_{12} + t_{22}) \alpha_1 \alpha_2 - \\
& s_2^2 t_{22} (1 + \alpha_2) + s_2 (-1 - t_{22} \alpha_2 + \alpha_1 (-1 + t_{22} - t_{12} \alpha_2 + t_{22} \alpha_2)) - \\
& s_1 (1 + t_{12} \alpha_2 + s_2^2 t_{22} (1 + \alpha_2) + \alpha_1 (1 + t_{12} (-1 + \alpha_2) - t_{22} \alpha_2) + \\
& s_2 (2 + t_{12} \alpha_2 + t_{22} \alpha_2 - \alpha_1 (-2 + t_{12} + t_{22} - t_{12} \alpha_2 + t_{22} \alpha_2))) \Big) \Big) + \\
& m_1 (t_{12} - t_{22}) (-2 - 2 \alpha_1 + 2 t_{12} \alpha_1 + s_1^2 (1 + s_2) (-1 + t_{12}^2) (1 + \alpha_1) - \\
& 2 t_{12} \alpha_2 - t_{12}^2 \alpha_1 \alpha_2 - t_{22} \alpha_1 \alpha_2 + 2 t_{12} t_{22} \alpha_1 \alpha_2 - s_2^2 (-1 + 2 t_{12}) \\
& t_{22} (1 + \alpha_2) - s_2 (1 - t_{22} \alpha_2 + t_{12}^2 \alpha_1 \alpha_2 + \alpha_1 (1 + t_{22} + t_{22} \alpha_2) + \\
& 2 t_{12} (1 + \alpha_2 - t_{22} (\alpha_1 - \alpha_2 + \alpha_1 \alpha_2))) - s_1 (3 + 3 \alpha_1 + t_{22} \alpha_1 \alpha_2 + \\
& s_2^2 (-1 + 2 t_{12}) t_{22} (1 + \alpha_2) + t_{12}^2 (\alpha_1 (-1 + \alpha_2) + \alpha_2) - \\
& 2 t_{12} (1 + \alpha_1 + t_{22} \alpha_1 \alpha_2) + s_2 (2 + t_{12}^2 \alpha_2 - t_{22} \alpha_2 + 2 t_{12} t_{22} \alpha_2 + \\
& \alpha_1 (2 + t_{22} + t_{12}^2 (-1 + \alpha_2) + t_{22} \alpha_2 - 2 t_{12} t_{22} (1 + \alpha_2)))) \Big) \Big) + \\
& m_2^2 (t_{12} - t_{22})^2 (m_1^3 (1 + s_2) (t_{12} - t_{22})^3 (s_1 + \alpha_1 + s_1 \alpha_1) (s_1 - \alpha_2) + \\
& (-1 + t_{12}) t_{12} (-2 \alpha_1 + s_1^2 (1 + s_2) (-1 + t_{12}) (1 + \alpha_1) + \\
& 2 \alpha_2 + \alpha_1 \alpha_2 - t_{12} \alpha_1 \alpha_2 - t_{22} \alpha_1 \alpha_2 + s_2^2 (1 + t_{22}) (1 + \alpha_2) + \\
& s_2 (3 + (3 + \alpha_1 - t_{12} \alpha_1) \alpha_2 - t_{22} (\alpha_1 - \alpha_2 + \alpha_1 \alpha_2)) + \\
& s_1 (-1 + 2 \alpha_2 - t_{12} \alpha_2 + s_2^2 (1 + t_{22}) (1 + \alpha_2) + \\
& \alpha_1 (-3 + t_{12} + \alpha_2 - t_{12} \alpha_2 - t_{22} \alpha_2) - s_2 (-2 + (-3 + t_{12} - t_{22}) \alpha_2 + \\
& \alpha_1 (1 + t_{22} + t_{12} (-1 + \alpha_2) - \alpha_2 + t_{22} \alpha_2))) - m_1^2 (t_{12} - t_{22})^2 \\
& (s_1^2 (1 + s_2) (-2 + t_{12}) (1 + \alpha_1) + (-t_{12} + t_{22}) \alpha_1 \alpha_2 - s_2^2 (1 + t_{22}) \\
& (1 + \alpha_2) + s_2 (-3 - (1 + t_{22}) \alpha_2 + \alpha_1 (-2 + t_{22} - t_{12} \alpha_2 + t_{22} \alpha_2)) - s_1 \\
& (3 + \alpha_2 + t_{12} \alpha_2 + s_2^2 (1 + t_{22}) (1 + \alpha_2) + \alpha_1 (2 + t_{12} (-1 + \alpha_2) - t_{22} \alpha_2) + \\
& s_2 (6 + (2 + t_{12} + t_{22}) \alpha_2 - \alpha_1 (-4 + t_{12} + t_{22} - t_{12} \alpha_2 + t_{22} \alpha_2))) \Big) \Big) - \\
& m_1 (t_{12} - t_{22}) (-2 - 2 t_{12} \alpha_1 + s_1^2 (1 + s_2) (-1 + t_{12}^2) (1 + \alpha_1) - \\
& 2 \alpha_2 + 2 t_{12} \alpha_2 - \alpha_1 \alpha_2 + 2 t_{12} \alpha_1 \alpha_2 - t_{12}^2 \alpha_1 \alpha_2 + t_{22} \alpha_1 \alpha_2 - \\
& 2 t_{12} t_{22} \alpha_1 \alpha_2 + s_2^2 (-1 + 2 t_{12}) (1 + t_{22}) (1 + \alpha_2) - \\
& s_2 (5 + 3 \alpha_2 + t_{22} \alpha_2 + t_{12}^2 \alpha_1 \alpha_2 + \alpha_1 (2 + \alpha_2 - t_{22} (1 + \alpha_2)) + \\
& 2 t_{12} (-3 - (2 + t_{22}) \alpha_2 + (-1 + t_{22}) \alpha_1 (1 + \alpha_2))) + \\
& s_1 (-3 - \alpha_1 - 2 \alpha_2 - \alpha_1 \alpha_2 + t_{22} \alpha_1 \alpha_2 + s_2^2 (-1 + 2 t_{12}) \\
& (1 + t_{22}) (1 + \alpha_2) - t_{12}^2 (\alpha_1 (-1 + \alpha_2) + \alpha_2) - \\
& 2 t_{12} (-1 + \alpha_1 - 2 \alpha_2 + (-1 + t_{22}) \alpha_1 \alpha_2) - s_2 (6 + 3 \alpha_2 + \\
& t_{22} \alpha_2 + t_{12}^2 (\alpha_1 (-1 + \alpha_2) + \alpha_2) + \alpha_1 (3 + \alpha_2 - t_{22} (1 + \alpha_2)) + \\
& 2 t_{12} (-4 - (3 + t_{22}) \alpha_2 + (-1 + t_{22}) \alpha_1 (1 + \alpha_2)))) \Big) \Big) + \\
& m_2 (t_{12} - t_{22}) ((-1 + m_1)^2 (1 + m_1) (1 + s_2) t_{12}^3 (-1 + 2 t_{22}) (s_1 + \\
& \alpha_1 + s_1 \alpha_1) (s_1 - \alpha_2) + m_1 t_{22} (s_2 - 4 t_{22} + 2 m_1 t_{22} - 6 s_2 t_{22} + \\
& m_1 s_2 t_{22} - 2 s_2^2 t_{22} + 2 m_1 s_2 t_{22}^2 + s_2^2 t_{22}^2 + 2 m_1 s_2^2 t_{22}^2 - \\
& m_1 s_2^2 t_{22}^3 + s_2 \alpha_1 - 2 t_{22} \alpha_1 - 2 s_2 t_{22} \alpha_1 - m_1 s_2 t_{22} \alpha_1 + \\
& 2 m_1 t_{22}^2 \alpha_1 - s_2 t_{22}^2 \alpha_1 + 2 m_1 s_2 t_{22}^2 \alpha_1 + m_1 s_2 t_{22}^3 \alpha_1 - \\
& s_1^2 (1 + s_2) (-1 + 2 t_{22}) (-1 + m_1 t_{22})^2 (1 + \alpha_1) - 2 t_{22} \alpha_2 + \\
& 2 m_1 t_{22} \alpha_2 - 4 s_2 t_{22} \alpha_2 + 2 m_1 s_2 t_{22} \alpha_2 - 2 s_2^2 t_{22} \alpha_2 - \\
& 2 m_1 t_{22}^2 \alpha_2 + s_2 t_{22}^2 \alpha_2 + s_2^2 t_{22}^2 \alpha_2 + 2 m_1 s_2^2 t_{22}^2 \alpha_2 - \\
& m_1 s_2 t_{22}^3 \alpha_2 - m_1 s_2^2 t_{22}^3 \alpha_2 + m_1 t_{22} \alpha_1 \alpha_2 + m_1 s_2 t_{22} \alpha_1 \alpha_2 - \\
& t_{22}^2 \alpha_1 \alpha_2 - 2 m_1 t_{22}^2 \alpha_1 \alpha_2 - m_1^2 t_{22}^2 \alpha_1 \alpha_2 - s_2 t_{22}^2 \alpha_1 \alpha_2 - \\
& 2 m_1 s_2 t_{22}^2 \alpha_1 \alpha_2 - m_1^2 s_2 t_{22}^2 \alpha_1 \alpha_2 + m_1 t_{22}^3 \alpha_1 \alpha_2 + 2 m_1^2 t_{22}^3 \alpha_1 \alpha_2 + \\
& m_1 s_2 t_{22}^3 \alpha_1 \alpha_2 + 2 m_1^2 s_2 t_{22}^3 \alpha_1 \alpha_2 + s_1 (-1 + m_1 t_{22}) (-1 - \alpha_1 - \\
& s_2^2 (-2 + t_{22}) t_{22} (1 + \alpha_2) + t_{22}^2 (\alpha_1 \alpha_2 + 2 m_1 (\alpha_1 (-1 + \alpha_2) + \alpha_2)) + \\
& t_{22} (6 + 2 \alpha_2 - m_1 \alpha_2 + \alpha_1 (4 + m_1 - m_1 \alpha_2)) + s_2 \\
& (-2 (1 + \alpha_1) + t_{22}^2 ((-1 + 2 m_1) \alpha_2 + \alpha_1 (1 + 2 m_1 (-1 + \alpha_2) + \alpha_2)) + \\
& t_{22} (8 + 4 \alpha_2 - m_1 \alpha_2 + \alpha_1 (4 + m_1 - m_1 \alpha_2)))) \Big) \Big) +
\end{aligned}$$

$$\begin{aligned} & t_{12} (-2 + 8 m_1 t_{22} - 4 m_1^2 t_{22}^2 - 2 \alpha_1 + 2 t_{22} \alpha_1 + 4 m_1 t_{22} \alpha_1 - 4 m_1^2 \\ & t_{22}^2 \alpha_1 + s_1^2 (1 + s_2) (-1 + 2 t_{22}) (1 + m_1 + 3 m_1^3 t_{22}^2 - m_1^2 t_{22} (4 + t_{22})) \\ & (1 + \alpha_1) - 2 t_{22} \alpha_2 + 4 m_1 t_{22} \alpha_2 - 4 m_1^2 t_{22} \alpha_2 + 4 m_1^2 t_{22}^2 \alpha_2 - \\ & 2 m_1^2 t_{22} \alpha_1 \alpha_2 - t_{22}^2 \alpha_1 \alpha_2 + m_1 t_{22}^2 \alpha_1 \alpha_2 + 3 m_1^2 t_{22}^2 \alpha_1 \alpha_2 + \\ & 3 m_1^3 t_{22}^2 \alpha_1 \alpha_2 + 2 m_1 t_{22}^3 \alpha_1 \alpha_2 - 6 m_1^3 t_{22}^3 \alpha_1 \alpha_2 + \\ & (-1 + m_1) s_2^2 (-2 + t_{22}) t_{22} (-1 + 2 m_1 t_{22}) (1 + \alpha_2) - \\ & s_2 (1 + \alpha_1 + 3 m_1^3 t_{22}^2 (-1 + 2 t_{22}) \alpha_1 \alpha_2 + t_{22} (2 - 2 \alpha_1 + 4 \alpha_2) + \\ & m_1^2 t_{22} (2 + t_{22} (4 + \alpha_1 (4 - 3 \alpha_2))) + 2 t_{22}^2 (\alpha_1 - \alpha_2) + 2 \alpha_1 (-1 + \alpha_2) + \\ & 4 \alpha_2) + t_{22}^2 (\alpha_1 - \alpha_2 + \alpha_1 \alpha_2) - m_1 (-1 - \alpha_1 + 2 t_{22} (4 + \alpha_1 + 3 \alpha_2) + \\ & 2 t_{22}^3 (\alpha_1 - \alpha_2 + \alpha_1 \alpha_2) + t_{22}^2 (4 + \alpha_1 + 3 \alpha_2 + \alpha_1 \alpha_2))) + \\ & s_1 (-3 + 2 t_{22} - 3 \alpha_1 + 4 t_{22} \alpha_1 - 2 t_{22} \alpha_2 - t_{22}^2 \alpha_1 \alpha_2 + s_2^2 (-2 + t_{22}) \\ & t_{22} (1 + \alpha_2) - 3 m_1^3 (1 + s_2) t_{22}^2 (-1 + 2 t_{22}) (\alpha_1 (-1 + \alpha_2) + \alpha_2) - \\ & s_2 (2 + 4 t_{22} \alpha_2 - t_{22}^2 \alpha_2 + \alpha_1 (2 - 4 t_{22} + t_{22}^2 (1 + \alpha_2))) + \\ & m_1^2 t_{22} (-2 t_{22}^2 (\alpha_1 - \alpha_2) + 2 s_2^2 (-2 + t_{22}) t_{22} (1 + \alpha_2) - \\ & 2 (-1 + \alpha_1 (-2 + \alpha_2) + \alpha_2) + t_{22} (-12 - \alpha_2 + \alpha_1 (-11 + 3 \alpha_2))) - \\ & s_2 (4 t_{22}^2 (\alpha_1 - \alpha_2) + 2 (-2 + \alpha_1 (-3 + \alpha_2) + \alpha_2) + \\ & t_{22} (16 + \alpha_1 (11 - 3 \alpha_2) + 5 \alpha_2))) + m_1 (-1 - \alpha_1 + 2 t_{22}^3 \alpha_1 \alpha_2 - \\ & s_2^2 t_{22} (-2 - 3 t_{22} + 2 t_{22}^2) (1 + \alpha_2) + 2 t_{22} (4 + 3 \alpha_1 + \alpha_2) + \\ & t_{22}^2 (4 + (4 + \alpha_1) \alpha_2) + s_2 (-2 (1 + \alpha_1) + 4 t_{22} (2 + \alpha_1 + \alpha_2) + \\ & 2 t_{22}^3 (\alpha_1 - \alpha_2 + \alpha_1 \alpha_2) + t_{22}^2 (8 + \alpha_1 + 7 \alpha_2 + \alpha_1 \alpha_2))) - \\ & (-1 + m_1) t_{12}^2 (2 + s_2 + 2 s_2 t_{22} + 2 s_2^2 t_{22} - s_2^2 t_{22}^2 + 2 \alpha_1 + s_2 \alpha_1 - \\ & 2 t_{22} \alpha_1 - 2 s_2 t_{22} \alpha_1 + s_2 t_{22}^2 \alpha_1 - 2 s_1^2 (1 + s_2) (-1 + 2 t_{22}) (1 + \alpha_1) + \\ & 3 m_1^2 (1 + s_2) t_{22} (-1 + 2 t_{22}) (s_1 + \alpha_1 + s_1 \alpha_1) (s_1 - \alpha_2) + 2 t_{22} \alpha_2 + \\ & 4 s_2 t_{22} \alpha_2 + 2 s_2^2 t_{22} \alpha_2 - s_2 t_{22}^2 \alpha_2 - s_2^2 t_{22}^2 \alpha_2 - \alpha_1 \alpha_2 - \\ & s_2 \alpha_1 \alpha_2 + 2 t_{22} \alpha_1 \alpha_2 + 2 s_2 t_{22} \alpha_1 \alpha_2 + t_{22}^2 \alpha_1 \alpha_2 + s_2 t_{22}^2 \alpha_1 \alpha_2 - \\ & s_1 (-3 - 4 \alpha_1 + \alpha_2 + \alpha_1 \alpha_2 - t_{22}^2 \alpha_1 \alpha_2 + s_2^2 (-2 + t_{22}) t_{22} (1 + \alpha_2) + \\ & t_{22} (2 + 6 \alpha_1 - 4 \alpha_2 - 2 \alpha_1 \alpha_2) + s_2 (-2 + \alpha_2 - 6 t_{22} \alpha_2 + \\ & t_{22}^2 \alpha_2 - \alpha_1 (3 + 2 t_{22} (-3 + \alpha_2) - \alpha_2 + t_{22}^2 (1 + \alpha_2)))) + \\ & m_1 (-2 - 2 t_{22} \alpha_1 + s_1^2 (1 + s_2) (2 - 5 t_{22} + 2 t_{22}^2) (1 + \alpha_1) - \\ & 2 \alpha_2 + 2 t_{22} \alpha_2 - \alpha_1 \alpha_2 + 3 t_{22} \alpha_1 \alpha_2 - 3 t_{22}^2 \alpha_1 \alpha_2 + \\ & s_2^2 (-2 + t_{22}) t_{22} (1 + \alpha_2) - s_2 (1 + t_{22} (2 + \alpha_1 (2 - 3 \alpha_2)) + \\ & \alpha_1 (-1 + \alpha_2) + 2 \alpha_2 + t_{22}^2 (\alpha_1 - \alpha_2 + 3 \alpha_1 \alpha_2)) + s_1 (1 + 2 \alpha_1 + t_{22}^2 \\ & (\alpha_1 (2 - 3 \alpha_2) - 2 \alpha_2) - \alpha_2 - \alpha_1 \alpha_2 + s_2^2 (-2 + t_{22}) t_{22} (1 + \alpha_2) + \\ & t_{22} (-6 + \alpha_2 + \alpha_1 (-7 + 3 \alpha_2)) - s_2 (-2 + \alpha_1 (-3 + \alpha_2) + \alpha_2 + t_{22} \\ & (8 + \alpha_1 (7 - 3 \alpha_2) + \alpha_2) + t_{22}^2 (\alpha_2 + \alpha_1 (-1 + 3 \alpha_2)))))))/ \\ & ((-1 + m_1 + m_2) (1 + s_1) (1 + s_2) (t_{12} - t_{22}) (-1 + m_2 (t_{12} - t_{22}) + t_{22}) \\ & (m_2 (t_{12} - t_{22}) + t_{22}) \\ & ((-1 + m_1) t_{12} - m_1 t_{22}) \\ & (1 + (-1 + m_1) t_{12} - m_1 t_{22}) \\ & (\alpha_1 + \alpha_2 + \alpha_1 \alpha_2))) \}; \end{aligned}$$

Therefore,  $p_{12}p_{22}g_{enmt12}$  and  $dd_{12}g_{enmt12}$  give the potential equilibria as functions of  $(t_{12}, t_{22})$ .

We still need to invoke `deltagenmale[[3]]` and `deltagenmale[[6]]` to get the equilibria.

We know from above that  $\text{deltagenmale}[[6]]$  is linear in  $r$  and  $\text{deltagenmale}[[3]]$  is quadratic in  $r$

```
factdelta3maler0 = Factor[Coefficient[deltagenmale[[3]], r, 0]]
```

```
Factor[factdelta3maler0 /. p12p22genmt12 /. dd12genmt12]
0
```

This took on the order of 60 CPU hours!

Therefore, the constant terms are zero!!! Hence there is a manifold, and the set of equilibria existing for  $r > 0$  is independent of  $r$ .

```
factdelta6maler0 = Factor[Coefficient[deltagenmale[[6]], r, 0]]
```

$$- \left( \left( -4 \text{dd1} m^2 + \dots 21585 \dots + 10 m^2 p_{22} s^2 t_{22}^5 \alpha^1 \alpha^2 - 5 m^2 p_{22} s^2 t_{22}^5 \alpha^1 \alpha^2 + m^2 p_{22} s^2 t_{22}^5 \alpha^1 \alpha^2 \right) / \left( 4 \left( 1 + \dots 9 \dots + m^2 t_{22} \alpha \right)^2 \left( 1 + m^2 s^2 t_{12} + \dots 8 \dots + s^2 t_{22} \alpha - m^2 s^2 t_{22} \alpha \right)^2 \right) \right)$$

[large output](#)
[show less](#)
[show more](#)
[show all](#)
[set size limit...](#)

Did not factor this one (too time consuming, and should also be 0 by symmetry)

```
factdelta3maler1 = Simplify[Numerator[Factor[Coefficient[deltagenmale[[3]], r, 1]]]]
```

Therefore, equilibria have to satisfy  $\text{Coefficient}[\text{deltagenmale}[[3]], r, 1] = 0$  and  $\text{Coefficient}[\text{deltagenmale}[[6]], r, 1] = 0$ .

This shows that if  $r > 0$ , then the equilibria are independent of  $r$ .

If  $r = 0$ , there is a manifold of equilibria which can be parameterized by  $(t_{12}, t_{22})$ .

```
factdelta6maler1 = Factor[Coefficient[deltagenmale[[6]], r, 1]]
```

```
Factor[factdelta6maler1 /. p12p22genmt12 /. dd12genmt12]
```

```
factdelta3maler1 = Factor[Coefficient[deltagenmale[[3]], r, 1]]
```

```
Factor[factdelta3maler1 /. p12p22genmt12 /. dd12genmt12]
```

$$\left( -4 m^3 t_{12}^5 + 4 m^2 s t_{12}^5 - 20 m^3 s t_{12}^5 + \dots 14582 \dots + 24 m^8 s^2 t_{22}^{12} \alpha^4 - 16 m^9 s^2 t_{22}^{12} \alpha^4 + 4 m^{10} s^2 t_{22}^{12} \alpha^4 \right) / \left( 2 \dots 10 \dots \left( 1 + s - s t_{12} + m s t_{12} - m s t_{22} + \alpha + s \alpha - t_{12} \alpha + m t_{12} \alpha - s t_{12} \alpha + m s t_{12} \alpha - m t_{22} \alpha - m s t_{22} \alpha \right) \right)$$

[large output](#)
[show less](#)
[show more](#)
[show all](#)
[set size limit...](#)

Next we show generic independence of the two remaining equilibrium conditions:

```
Factor[Numerator[Factor[factdelta3maler1 /. p12p22genmt12 /. dd12genmt12]] -
Numerator[Factor[factdelta6maler1 /. p12p22genmt12 /. dd12genmt12]]]
```

Generically, this is not zero. Therefore, for  $t_{12}$  there will be finitely many solutions  $t_{22}$ . Because this becomes too complicated, we assume symmetric parameters below.

## 2.2.3 Symmetric parameters

```
sympar = {s1 → s, s2 → s, m1 → m, m2 → m, α1 → α, α2 → α};
```

```
factdelta6msymr1 = Factor[Coefficient[deltagenmale[[6]], r, 1] /. sympar];
```

```
Factor[factdelta6msymr1 /. p12p22genmt12 /. dd12genmt12 /. sympar]
```

$$\left( \dots 14\,434 \dots + 24 m^8 s^2 t_{22}^{12} \alpha^4 - 16 m^9 s^2 t_{22}^{12} \alpha^4 + 4 m^{10} s^2 t_{22}^{12} \alpha^4 \right) / \left( 2 \dots 10 \dots \right. \\ \left. (1 + m s t_{12} + s t_{22} - m s t_{22} + m t_{12} \alpha + m s t_{12} \alpha + t_{22} \alpha - m t_{22} \alpha + s t_{22} \alpha - m s t_{22} \alpha) \right)$$

[large output](#)
[show less](#)
[show more](#)
[show all](#)
[set size limit...](#)

```
factdelta3msymr1 = Factor[Coefficient[deltagenmale[[3]], r, 1] /. sympar];
```

```
Factor[factdelta3msymr1 /. p12p22genmt12 /. dd12genmt12 /. sympar]
```

$$\left( -4 m^3 t_{12}^5 + 4 m^2 s t_{12}^5 - 20 m^3 s t_{12}^5 + \dots 14\,582 \dots + 24 m^8 s^2 t_{22}^{12} \alpha^4 - 16 m^9 s^2 t_{22}^{12} \alpha^4 + 4 m^{10} s^2 t_{22}^{12} \alpha^4 \right) / \\ \left( 2 \dots 10 \dots (1 + s - s t_{12} + m s t_{12} - m s t_{22} + \alpha + s \alpha - t_{12} \alpha + m t_{12} \alpha - s t_{12} \alpha + m s t_{12} \alpha - m t_{22} \alpha - m s t_{22} \alpha) \right)$$

[large output](#)
[show less](#)
[show more](#)
[show all](#)
[set size limit...](#)

Next we show generic independence of the two remaining equilibrium conditions:

```
Factor[Numerator[Factor[factdelta3msymr1 /. p12p22genmt12 /. dd12genmt12 /. sympar]] - \\ Numerator[Factor[factdelta6msymr1 /. p12p22genmt12 /. dd12genmt12 /. sympar]]]
```

$$- \left( -1 + 2 m \right) s \left( 2 + s \right) \left( t_{12} - t_{22} \right) \left( -1 + t_{12} + t_{22} \right) \left( -t_{12} + m t_{12} - m t_{22} \right) \\ \left( 1 - t_{12} + m t_{12} - m t_{22} \right) \left( -1 + m t_{12} + t_{22} - m t_{22} \right) \left( m t_{12} + t_{22} - m t_{22} \right) \left( 1 + \alpha \right) \\ \left( -2 m t_{12}^2 - 2 m s t_{12}^2 - 2 m^2 s t_{12}^2 - m s^2 t_{12}^2 - m^2 s^2 t_{12}^2 + 2 m t_{12}^3 - 4 m^2 t_{12}^3 + 4 m^3 t_{12}^3 + \right. \\ 2 m s t_{12}^3 - 2 m^2 s t_{12}^3 + 4 m^3 s t_{12}^3 + 2 m s^2 t_{12}^3 + 2 m^2 s^2 t_{12}^4 - 8 m^3 s t_{12}^4 + 6 m^4 s t_{12}^4 - \\ m s^2 t_{12}^4 - 2 m^3 s^2 t_{12}^4 + 3 m^4 s^2 t_{12}^4 + m^2 s^2 t_{12}^5 - 3 m^4 s^2 t_{12}^5 + 2 m^5 s^2 t_{12}^5 - 2 s t_{12} t_{22} + \\ 4 m^2 s t_{12} t_{22} - s^2 t_{12} t_{22} + 2 m^2 s^2 t_{12} t_{22} - 2 m t_{12}^2 t_{22} + 12 m^2 t_{12}^2 t_{22} - 12 m^3 t_{12}^2 t_{22} + \\ 2 s t_{12}^2 t_{22} - 2 m s t_{12}^2 t_{22} + 10 m^2 s t_{12}^2 t_{22} - 12 m^3 s t_{12}^2 t_{22} + 2 s^2 t_{12}^2 t_{22} - 2 m s^2 t_{12}^2 t_{22} + \\ 2 m^2 s^2 t_{12}^2 t_{22} - 12 m^2 s t_{12}^3 t_{22} + 32 m^3 s t_{12}^3 t_{22} - 24 m^4 s t_{12}^3 t_{22} - s^2 t_{12}^3 t_{22} - \\ 4 m^2 s^2 t_{12}^3 t_{22} + 12 m^3 s^2 t_{12}^3 t_{22} - 12 m^4 s^2 t_{12}^3 t_{22} + 2 m s^2 t_{12}^4 t_{22} - 3 m^2 s^2 t_{12}^4 t_{22} - \\ 4 m^3 s^2 t_{12}^4 t_{22} + 15 m^4 s^2 t_{12}^4 t_{22} - 10 m^5 s^2 t_{12}^4 t_{22} + 2 m t_{22}^2 + 2 m s t_{22}^2 - 2 m^2 s t_{22}^2 + \\ m s^2 t_{22}^2 - m^2 s^2 t_{22}^2 + 2 m t_{12} t_{22}^2 - 12 m^2 t_{12} t_{22}^2 + 12 m^3 t_{12} t_{22}^2 + 2 s t_{12} t_{22}^2 + \\ 2 m s t_{12} t_{22}^2 - 14 m^2 s t_{12} t_{22}^2 + 12 m^3 s t_{12} t_{22}^2 + 2 m s^2 t_{12} t_{22}^2 - 4 m^2 s^2 t_{12} t_{22}^2 - \\ 2 s t_{12}^2 t_{22}^2 + 20 m^2 s t_{12}^2 t_{22}^2 - 48 m^3 s t_{12}^2 t_{22}^2 + 36 m^4 s t_{12}^2 t_{22}^2 - s^2 t_{12}^2 t_{22}^2 + \\ 10 m^2 s^2 t_{12}^2 t_{22}^2 - 24 m^3 s^2 t_{12}^2 t_{22}^2 + 18 m^4 s^2 t_{12}^2 t_{22}^2 + s^2 t_{12}^3 t_{22}^2 - 4 m s^2 t_{12}^3 t_{22}^2 + \\ 4 m^2 s^2 t_{12}^3 t_{22}^2 + 12 m^3 s^2 t_{12}^3 t_{22}^2 - 30 m^4 s^2 t_{12}^3 t_{22}^2 + 20 m^5 s^2 t_{12}^3 t_{22}^2 - 2 m t_{22}^3 + \\ 4 m^2 t_{22}^3 - 4 m^3 t_{22}^3 - 2 m s t_{22}^3 + 6 m^2 s t_{22}^3 - 4 m^3 s t_{22}^3 - 2 m s^2 t_{22}^3 + 2 m^2 s^2 t_{22}^3 - \\ 12 m^2 s t_{12} t_{22}^3 + 32 m^3 s t_{12} t_{22}^3 - 24 m^4 s t_{12} t_{22}^3 + s^2 t_{12} t_{22}^3 - 8 m^2 s^2 t_{12} t_{22}^3 + \\ 20 m^3 s^2 t_{12} t_{22}^3 - 12 m^4 s^2 t_{12} t_{22}^3 - s^2 t_{12}^2 t_{22}^3 + 4 m s^2 t_{12}^2 t_{22}^3 - 4 m^2 s^2 t_{12}^2 t_{22}^3 - \\ 12 m^3 s^2 t_{12}^2 t_{22}^3 + 30 m^4 s^2 t_{12}^2 t_{22}^3 - 20 m^5 s^2 t_{12}^2 t_{22}^3 + 2 m^2 s t_{22}^4 - 8 m^3 s t_{22}^4 + \\ 6 m^4 s t_{22}^4 + m s^2 t_{22}^4 + 2 m^2 s^2 t_{22}^4 - 6 m^3 s^2 t_{22}^4 + 3 m^4 s^2 t_{22}^4 - 2 m s^2 t_{12} t_{22}^4 + \\ 3 m^2 s^2 t_{12} t_{22}^4 + 4 m^3 s^2 t_{12} t_{22}^4 - 15 m^4 s^2 t_{12} t_{22}^4 + 10 m^5 s^2 t_{12} t_{22}^4 - m^2 s^2 t_{22}^5 + \\ 3 m^4 s^2 t_{22}^5 - 2 m^5 s^2 t_{22}^5 - 2 m t_{12}^2 \alpha - 2 m s t_{12}^2 \alpha - 2 m^2 s t_{12}^2 \alpha - m s^2 t_{12}^2 \alpha - m^2 s^2 t_{12}^2 \alpha +$$

$$\begin{aligned}
& 2 m t_{12}^3 \alpha - 4 m^2 t_{12}^3 \alpha + 4 m^3 t_{12}^3 \alpha + 2 m s t_{12}^3 \alpha - 2 m^2 s t_{12}^3 \alpha + 4 m^3 s t_{12}^3 \alpha + 2 m s^2 t_{12}^3 \alpha + \\
& 2 m^2 s t_{12}^4 \alpha - 8 m^3 s t_{12}^4 \alpha + 6 m^4 s t_{12}^4 \alpha - m s^2 t_{12}^4 \alpha - 2 m^3 s^2 t_{12}^4 \alpha + 3 m^4 s^2 t_{12}^4 \alpha + \\
& m^2 s^2 t_{12}^5 \alpha - 3 m^4 s^2 t_{12}^5 \alpha + 2 m^5 s^2 t_{12}^5 \alpha - 2 s t_{12} t_{22} \alpha + 4 m^2 s t_{12} t_{22} \alpha - s^2 t_{12} t_{22} \alpha + \\
& 2 m^2 s^2 t_{12} t_{22} \alpha - 2 m t_{12}^2 t_{22} \alpha + 12 m^2 t_{12}^2 t_{22} \alpha - 12 m^3 t_{12}^2 t_{22} \alpha + 2 s t_{12}^2 t_{22} \alpha - \\
& 2 m s t_{12}^2 t_{22} \alpha + 10 m^2 s t_{12}^2 t_{22} \alpha - 12 m^3 s t_{12}^2 t_{22} \alpha + 2 s^2 t_{12}^2 t_{22} \alpha - 2 m s^2 t_{12}^2 t_{22} \alpha + \\
& 2 m^2 s^2 t_{12}^2 t_{22} \alpha - 12 m^2 s t_{12}^3 t_{22} \alpha + 32 m^3 s t_{12}^3 t_{22} \alpha - 24 m^4 s t_{12}^3 t_{22} \alpha - s^2 t_{12}^3 t_{22} \alpha - \\
& 4 m^2 s^2 t_{12}^3 t_{22} \alpha + 12 m^3 s^2 t_{12}^3 t_{22} \alpha - 12 m^4 s^2 t_{12}^3 t_{22} \alpha + 2 m s^2 t_{12}^4 t_{22} \alpha - \\
& 3 m^2 s^2 t_{12}^4 t_{22} \alpha - 4 m^3 s^2 t_{12}^4 t_{22} \alpha + 15 m^4 s^2 t_{12}^4 t_{22} \alpha - 10 m^5 s^2 t_{12}^4 t_{22} \alpha + \\
& 2 m t_{22}^2 \alpha + 2 m s t_{22}^2 \alpha - 2 m^2 s t_{22}^2 \alpha + m s^2 t_{22}^2 \alpha - m^2 s^2 t_{22}^2 \alpha + 2 m t_{12} t_{22}^2 \alpha - \\
& 12 m^2 t_{12} t_{22}^2 \alpha + 12 m^3 t_{12} t_{22}^2 \alpha + 2 s t_{12} t_{22}^2 \alpha + 2 m s t_{12} t_{22}^2 \alpha - 14 m^2 s t_{12} t_{22}^2 \alpha + \\
& 12 m^3 s t_{12} t_{22}^2 \alpha + 2 m s^2 t_{12} t_{22}^2 \alpha - 4 m^2 s^2 t_{12} t_{22}^2 \alpha - 2 s t_{12}^2 t_{22}^2 \alpha + 20 m^2 s t_{12}^2 t_{22}^2 \alpha - \\
& 48 m^3 s t_{12}^2 t_{22}^2 \alpha + 36 m^4 s t_{12}^2 t_{22}^2 \alpha - s^2 t_{12}^2 t_{22}^2 \alpha + 10 m^2 s^2 t_{12}^2 t_{22}^2 \alpha - \\
& 24 m^3 s^2 t_{12}^2 t_{22}^2 \alpha + 18 m^4 s^2 t_{12}^2 t_{22}^2 \alpha + s^2 t_{12}^3 t_{22}^2 \alpha - 4 m s^2 t_{12}^3 t_{22}^2 \alpha + \\
& 4 m^2 s^2 t_{12}^3 t_{22}^2 \alpha + 12 m^3 s^2 t_{12}^3 t_{22}^2 \alpha - 30 m^4 s^2 t_{12}^3 t_{22}^2 \alpha + 20 m^5 s^2 t_{12}^3 t_{22}^2 \alpha - \\
& 2 m t_{22}^3 \alpha + 4 m^2 t_{22}^3 \alpha - 4 m^3 t_{22}^3 \alpha - 2 m s t_{22}^3 \alpha + 6 m^2 s t_{22}^3 \alpha - 4 m^3 s t_{22}^3 \alpha - \\
& 2 m s^2 t_{22}^3 \alpha + 2 m^2 s^2 t_{22}^3 \alpha - 12 m^2 s t_{12} t_{22}^3 \alpha + 32 m^3 s t_{12} t_{22}^3 \alpha - 24 m^4 s t_{12} t_{22}^3 \alpha + \\
& s^2 t_{12} t_{22}^3 \alpha - 8 m^2 s^2 t_{12} t_{22}^3 \alpha + 20 m^3 s^2 t_{12} t_{22}^3 \alpha - 12 m^4 s^2 t_{12} t_{22}^3 \alpha - s^2 t_{12}^2 t_{22}^3 \alpha + \\
& 4 m s^2 t_{12}^2 t_{22}^3 \alpha - 4 m^2 s^2 t_{12}^2 t_{22}^3 \alpha - 12 m^3 s^2 t_{12}^2 t_{22}^3 \alpha + 30 m^4 s^2 t_{12}^2 t_{22}^3 \alpha - \\
& 20 m^5 s^2 t_{12}^2 t_{22}^3 \alpha + 2 m^2 s t_{22}^4 \alpha - 8 m^3 s t_{22}^4 \alpha + 6 m^4 s t_{22}^4 \alpha + m s^2 t_{22}^4 \alpha + 2 m^2 s^2 t_{22}^4 \alpha - \\
& 6 m^3 s^2 t_{22}^4 \alpha + 3 m^4 s^2 t_{22}^4 \alpha - 2 m s^2 t_{12} t_{22}^4 \alpha + 3 m^2 s^2 t_{12} t_{22}^4 \alpha + 4 m^3 s^2 t_{12} t_{22}^4 \alpha - \\
& 15 m^4 s^2 t_{12} t_{22}^4 \alpha + 10 m^5 s^2 t_{12} t_{22}^4 \alpha - m^2 s^2 t_{22}^5 \alpha + 3 m^4 s^2 t_{22}^5 \alpha - 2 m^5 s^2 t_{22}^5 \alpha - \\
& m t_{12}^3 \alpha^2 - m^2 t_{12}^3 \alpha^2 + 2 m^3 t_{12}^3 \alpha^2 - m s t_{12}^3 \alpha^2 - m^2 s t_{12}^3 \alpha^2 + 2 m^3 s t_{12}^3 \alpha^2 + m t_{12}^4 \alpha^2 + \\
& m^2 t_{12}^4 \alpha^2 - 2 m^3 t_{12}^4 \alpha^2 + m s t_{12}^4 \alpha^2 + m^2 s t_{12}^4 \alpha^2 - 2 m^3 s t_{12}^4 \alpha^2 - m^2 t_{12}^5 \alpha^2 + 3 m^4 t_{12}^5 \alpha^2 - \\
& 2 m^5 t_{12}^5 \alpha^2 - m^2 s t_{12}^5 \alpha^2 + 3 m^4 s t_{12}^5 \alpha^2 - 2 m^5 s t_{12}^5 \alpha^2 - t_{12}^2 t_{22} \alpha^2 + m t_{12}^2 t_{22} \alpha^2 + \\
& 3 m^2 t_{12}^2 t_{22} \alpha^2 - 6 m^3 t_{12}^2 t_{22} \alpha^2 - s t_{12}^2 t_{22} \alpha^2 + m s t_{12}^2 t_{22} \alpha^2 + 3 m^2 s t_{12}^2 t_{22} \alpha^2 - \\
& 6 m^3 s t_{12}^2 t_{22} \alpha^2 + t_{12}^3 t_{22} \alpha^2 - 2 m^2 t_{12}^3 t_{22} \alpha^2 + 4 m^3 t_{12}^3 t_{22} \alpha^2 + s t_{12}^3 t_{22} \alpha^2 - \\
& 2 m^2 s t_{12}^3 t_{22} \alpha^2 + 4 m^3 s t_{12}^3 t_{22} \alpha^2 - 2 m t_{12}^4 t_{22} \alpha^2 + 3 m^2 t_{12}^4 t_{22} \alpha^2 + 4 m^3 t_{12}^4 t_{22} \alpha^2 - \\
& 15 m^4 t_{12}^4 t_{22} \alpha^2 + 10 m^5 t_{12}^4 t_{22} \alpha^2 - 2 m s t_{12}^4 t_{22} \alpha^2 + 3 m^2 s t_{12}^4 t_{22} \alpha^2 + 4 m^3 s t_{12}^4 t_{22} \alpha^2 - \\
& 15 m^4 s t_{12}^4 t_{22} \alpha^2 + 10 m^5 s t_{12}^4 t_{22} \alpha^2 + t_{12} t_{22}^2 \alpha^2 - m t_{12} t_{22}^2 \alpha^2 - 3 m^2 t_{12} t_{22}^2 \alpha^2 + \\
& 6 m^3 t_{12} t_{22}^2 \alpha^2 + s t_{12} t_{22}^2 \alpha^2 - m s t_{12} t_{22}^2 \alpha^2 - 3 m^2 s t_{12} t_{22}^2 \alpha^2 + 6 m^3 s t_{12} t_{22}^2 \alpha^2 - \\
& t_{12}^3 t_{22}^2 \alpha^2 + 4 m t_{12}^3 t_{22}^2 \alpha^2 - 4 m^2 t_{12}^3 t_{22}^2 \alpha^2 - 12 m^3 t_{12}^3 t_{22}^2 \alpha^2 + 30 m^4 t_{12}^3 t_{22}^2 \alpha^2 - \\
& 20 m^5 t_{12}^3 t_{22}^2 \alpha^2 - s t_{12}^3 t_{22}^2 \alpha^2 + 4 m s t_{12}^3 t_{22}^2 \alpha^2 - 4 m^2 s t_{12}^3 t_{22}^2 \alpha^2 - 12 m^3 s t_{12}^3 t_{22}^2 \alpha^2 + \\
& 30 m^4 s t_{12}^3 t_{22}^2 \alpha^2 - 20 m^5 s t_{12}^3 t_{22}^2 \alpha^2 + m t_{22}^3 \alpha^2 + m^2 t_{22}^3 \alpha^2 - 2 m^3 t_{22}^3 \alpha^2 + m s t_{22}^3 \alpha^2 + \\
& m^2 s t_{22}^3 \alpha^2 - 2 m^3 s t_{22}^3 \alpha^2 - t_{12} t_{22}^3 \alpha^2 + 2 m^2 t_{12} t_{22}^3 \alpha^2 - 4 m^3 t_{12} t_{22}^3 \alpha^2 - s t_{12} t_{22}^3 \alpha^2 + \\
& 2 m^2 s t_{12} t_{22}^3 \alpha^2 - 4 m^3 s t_{12} t_{22}^3 \alpha^2 + t_{12}^2 t_{22}^3 \alpha^2 - 4 m t_{12}^2 t_{22}^3 \alpha^2 + 4 m^2 t_{12}^2 t_{22}^3 \alpha^2 + \\
& 12 m^3 t_{12}^2 t_{22}^3 \alpha^2 - 30 m^4 t_{12}^2 t_{22}^3 \alpha^2 + 20 m^5 t_{12}^2 t_{22}^3 \alpha^2 + s t_{12}^2 t_{22}^3 \alpha^2 - 4 m s t_{12}^2 t_{22}^3 \alpha^2 + \\
& 4 m^2 s t_{12}^2 t_{22}^3 \alpha^2 + 12 m^3 s t_{12}^2 t_{22}^3 \alpha^2 - 30 m^4 s t_{12}^2 t_{22}^3 \alpha^2 + 20 m^5 s t_{12}^2 t_{22}^3 \alpha^2 - \\
& m t_{22}^4 \alpha^2 - m^2 t_{22}^4 \alpha^2 + 2 m^3 t_{22}^4 \alpha^2 - m s t_{22}^4 \alpha^2 - m^2 s t_{22}^4 \alpha^2 + 2 m^3 s t_{22}^4 \alpha^2 + 2 m t_{12} t_{22}^4 \alpha^2 - \\
& 3 m^2 t_{12} t_{22}^4 \alpha^2 - 4 m^3 t_{12} t_{22}^4 \alpha^2 + 15 m^4 t_{12} t_{22}^4 \alpha^2 - 10 m^5 t_{12} t_{22}^4 \alpha^2 + 2 m s t_{12} t_{22}^4 \alpha^2 - \\
& 3 m^2 s t_{12} t_{22}^4 \alpha^2 - 4 m^3 s t_{12} t_{22}^4 \alpha^2 + 15 m^4 s t_{12} t_{22}^4 \alpha^2 - 10 m^5 s t_{12} t_{22}^4 \alpha^2 + \\
& m^2 t_{22}^5 \alpha^2 - 3 m^4 t_{22}^5 \alpha^2 + 2 m^5 t_{22}^5 \alpha^2 + m^2 s t_{22}^5 \alpha^2 - 3 m^4 s t_{22}^5 \alpha^2 + 2 m^5 s t_{22}^5 \alpha^2 )
\end{aligned}$$

This equals 0 if  $t_{12} = t_{22}$  or if  $t_{12} = 1 - t_{22}$  (or if  $m=1/2$ ). The linear factors depending on  $m$  do not give admissible nontrivial solutions (as is easily shown). The complicated factor can be solved for  $t_{12}$  or  $t_{22}$ . Because this factor is a polynomial, generically, it has finitely many solutions for given  $t_{22}$  (or  $t_{12}$ ). Therefore, generically, there will be finitely many solutions of the equilibrium conditions ( $\text{factdelta3maler1/p12p22genmt12/dd12genmt12}$ )=0 and ( $\text{factdelta6maler1/p12p22genmt12/dd12genmt12}$ )=0, and not a curve or manifold (as when selection acts on both sexes). At least one equilibrium is symmetric, i.e., satisfied  $t_{12}=1-t_{22}$ .

```

Simplify[
  Numerator[Factor[factdelta3msymr1 /. p12p22genmt12 /. dd12genmt12 /. t12 -> 1 - t22 /.
    sympar]] - Numerator[
    Factor[factdelta6msymr1 /. p12p22genmt12 /. dd12genmt12 /. t12 -> 1 - t22 /. sympar]]]
0

```

Thus, if  $t_{12} = 1 - t_{22}$ , the two conditions collapse to one, as it should be. Here is the polynomial in  $t_{22}$ , whose zeros give rise to the potential equilibria (but not all solutions  $t_{22}$  may give rise to admissible equilibria)

```

symfacdelta3 =
  Simplify[factdelta3msymr1 /. p12p22genmt12 /. dd12genmt12 /. t12 -> 1 - t22 /. sympar]
Exponent[Numerator[Factor[symfacdelta3]], t22]
7

```

This is a polynomial of degree 7. Hence, there may be up to 7 zeros (potentially giving rise to equilibria).

Study this polynomial:

```
Factor[Numerator[Factor[symfacdelta3]] /. t22 -> 0]
```

$$\begin{aligned}
& m^2 (4 - 24m + 16m^2 + 4s - 16ms - 44m^2s + 40m^3s + s^2 + 2ms^2 - 47m^2s^2 - 12m^3s^2 + 32m^4s^2 + 2ms^3 - \\
& 8m^2s^3 - 30m^3s^3 + 12m^4s^3 + 8m^5s^3 + m^2s^4 - 6m^3s^4 - 3m^4s^4 + 4m^5s^4 + 8\alpha - 48m\alpha + \\
& 32m^2\alpha + 8s\alpha - 32ms\alpha - 88m^2s\alpha + 80m^3s\alpha + 2s^2\alpha + 4ms^2\alpha - 94m^2s^2\alpha - 24m^3s^2\alpha + \\
& 64m^4s^2\alpha + 4ms^3\alpha - 16m^2s^3\alpha - 60m^3s^3\alpha + 24m^4s^3\alpha + 16m^5s^3\alpha + 2m^2s^4\alpha - 12m^3s^4\alpha - \\
& 6m^4s^4\alpha + 8m^5s^4\alpha + 5\alpha^2 - 30m\alpha^2 + 5m^2\alpha^2 + 28m^3\alpha^2 - 12m^4\alpha^2 + 5s\alpha^2 - 20ms\alpha^2 - \\
& 83m^2s\alpha^2 + 94m^3s\alpha^2 - 4m^4s\alpha^2 - 8m^5s\alpha^2 + s^2\alpha^2 + 5ms^2\alpha^2 - 81m^2s^2\alpha^2 + 11m^3s^2\alpha^2 + \\
& 52m^4s^2\alpha^2 - 12m^5s^2\alpha^2 + 3ms^3\alpha^2 - 14m^2s^3\alpha^2 - 33m^3s^3\alpha^2 + 24m^4s^3\alpha^2 + 4m^5s^3\alpha^2 + \\
& m^2s^4\alpha^2 - 6m^3s^4\alpha^2 - 3m^4s^4\alpha^2 + 4m^5s^4\alpha^2 + \alpha^3 - 6m\alpha^3 - 11m^2\alpha^3 + 28m^3\alpha^3 - 12m^4\alpha^3 + s\alpha^3 - \\
& 4ms\alpha^3 - 39m^2s\alpha^3 + 54m^3s\alpha^3 - 4m^4s\alpha^3 - 8m^5s\alpha^3 + 3ms^2\alpha^3 - 34m^2s^2\alpha^3 + 23m^3s^2\alpha^3 + \\
& 20m^4s^2\alpha^3 - 12m^5s^2\alpha^3 + ms^3\alpha^3 - 6m^2s^3\alpha^3 - 3m^3s^3\alpha^3 + 12m^4s^3\alpha^3 - 4m^5s^3\alpha^3 - 4m^2\alpha^4 + \\
& 8m^3\alpha^4 - 4m^4\alpha^4 - 8m^2s\alpha^4 + 16m^3s\alpha^4 - 8m^4s\alpha^4 - 4m^2s^2\alpha^4 + 8m^3s^2\alpha^4 - 4m^4s^2\alpha^4)
\end{aligned}$$

This is positive if  $m$  and  $s$  are small and  $\alpha$  is not too large!

```
Factor[Numerator[Factor[symfacdelta3]] /. t22 -> 1/2]
```

$$-\frac{1}{64} s^2 (2+s)^2 (1+\alpha)^2$$

This is always negative!

**Factor[Numerator[Factor[symfacdelta3]] /. t22 → 1]**

$$\begin{aligned}
 & -m^2 \\
 & (-4 + 24m - 16m^2 - 12s + 80ms - 108m^2s + 40m^3s - 13s^2 + 94ms^2 - 181m^2s^2 + 132m^3s^2 - 32m^4s^2 - \\
 & 6s^3 + 46ms^3 - 110m^2s^3 + 114m^3s^3 - 52m^4s^3 + 8m^5s^3 - s^4 + 8ms^4 - 22m^2s^4 + 28m^3s^4 - 17m^4s^4 + \\
 & 4m^5s^4 - 8\alpha + 48m\alpha - 32m^2\alpha - 24s\alpha + 160ms\alpha - 216m^2s\alpha + 80m^3s\alpha - 26s^2\alpha + 188ms^2\alpha - \\
 & 362m^2s^2\alpha + 264m^3s^2\alpha - 64m^4s^2\alpha - 12s^3\alpha + 92ms^3\alpha - 220m^2s^3\alpha + 228m^3s^3\alpha - 104m^4s^3\alpha + \\
 & 16m^5s^3\alpha - 2s^4\alpha + 16ms^4\alpha - 44m^2s^4\alpha + 56m^3s^4\alpha - 34m^4s^4\alpha + 8m^5s^4\alpha - 5\alpha^2 + 30m\alpha^2 - \\
 & 5m^2\alpha^2 - 28m^3\alpha^2 + 12m^4\alpha^2 - 15s\alpha^2 + 100ms\alpha^2 - 103m^2s\alpha^2 - 18m^3s\alpha^2 + 44m^4s\alpha^2 - \\
 & 8m^5s\alpha^2 - 16s^2\alpha^2 + 115ms^2\alpha^2 - 198m^2s^2\alpha^2 + 103m^3s^2\alpha^2 + 8m^4s^2\alpha^2 - 12m^5s^2\alpha^2 - 7s^3\alpha^2 + \\
 & 53m^3s^3\alpha^2 - 121m^2s^3\alpha^2 + 115m^3s^3\alpha^2 - 44m^4s^3\alpha^2 + 4m^5s^3\alpha^2 - s^4\alpha^2 + 8ms^4\alpha^2 - 22m^2s^4\alpha^2 + \\
 & 28m^3s^4\alpha^2 - 17m^4s^4\alpha^2 + 4m^5s^4\alpha^2 - \alpha^3 + 6m\alpha^3 + 11m^2\alpha^3 - 28m^3\alpha^3 + 12m^4\alpha^3 - 3s\alpha^3 + 20ms\alpha^3 + \\
 & 5m^2s\alpha^3 - 58m^3s\alpha^3 + 44m^4s\alpha^3 - 8m^5s\alpha^3 - 3s^2\alpha^3 + 21ms^2\alpha^3 - 17m^2s^2\alpha^3 - 29m^3s^2\alpha^3 + \\
 & 40m^4s^2\alpha^3 - 12m^5s^2\alpha^3 - s^3\alpha^3 + 7ms^3\alpha^3 - 11m^2s^3\alpha^3 + m^3s^3\alpha^3 + 8m^4s^3\alpha^3 - 4m^5s^3\alpha^3 + \\
 & 4m^2\alpha^4 - 8m^3\alpha^4 + 4m^4\alpha^4 + 8m^2s\alpha^4 - 16m^3s\alpha^4 + 8m^4s\alpha^4 + 4m^2s^2\alpha^4 - 8m^3s^2\alpha^4 + 4m^4s^2\alpha^4)
 \end{aligned}$$

This is positive if m and s are small and  $\alpha$  is not too large!

Therefore, if m and s are small and  $\alpha$  is not too large, then there is one solution satisfying  $0 < t22 < 0.5$  and a second solution satisfying  $0.5 < t22 < 1$ .

Numerical examples. Compute t22 for various parameter combinations; then compute (p22,t22,dd2):

```

Select[
  t22 /. NSolve[(symfacdelta3 /. {s → 0.2, m → 0.05, α → 1}) == 0, t22, Reals], 0 < # < 1 &]
{0.472115, 0.651443}

N[{p22, t22, dd2} /. p12p22genmt12 /. dd12genmt12 /. sympar /. {s → 0.2, m → 0.05, α → 1} /.
  t12 → 1 - t22 /. {t22 → %}]
{{0.336905, 0.525193}, {0.472115, 0.651443}, {1.45769, 0.0377726}}

```

Only second solution admissible

```

Select[
  t22 /. NSolve[(symfacdelta3 /. {s → 0.2, m → 0.05, α → 1}) == 0, t22, Reals], 0 < # < 1 &]
{0.472115, 0.651443}

N[{p22, t22, dd2} /. p12p22genmt12 /. dd12genmt12 /. sympar /. {s → 0.2, m → 0.05, α → 1} /.
  t12 → 1 - t22 /. {t22 → %}]
{{0.336905, 0.525193}, {0.472115, 0.651443}, {1.45769, 0.0377726}}

```

Only second solution admissible

```

Select[
  t22 /. NSolve[(symfacdelta3 /. {s → 0.2, m → 0.05, α → 68}) == 0, t22, Reals], 0 < # < 1 &]
{0.460396, 0.50709}

N[{p22, t22, dd2} /. p12p22genmt12 /. dd12genmt12 /. sympar /.
  {s → 0.2, m → 0.05, α → 68} /. t12 → 1 - t22 /. {t22 → %}]
{{0.449534, 0.505554}, {0.460396, 0.50709}, {0.316568, 0.195795}}

```

Only second solution admissible



```
Select[
  t22 /. NSolve[(symfacdelta3 /. {s → 0.2, m → 0.05, α → 69}) == 0, t22, Reals], 0 < # < 1 &]
{0.00142376, 0.459558, 0.507006}
```

```
N[{p22, t22, dd2} /. p12p22genmt12 /. dd12genmt12 /. sympar /.
  {s → 0.2, m → 0.05, α → 69} /. t12 → 1 - t22 /. {t22 → %}]
{{-0.122554, 0.448558, 0.505498},
 {0.00142376, 0.459558, 0.507006}, {0.00177527, 0.315918, 0.196143}}
```

Only third solution admissible

```
Select[
  t22 /. NSolve[(symfacdelta3 /. {s → 0.2, m → 0.05, α → 90}) == 0, t22, Reals], 0 < # < 1 &]
{0.0971816, 0.419647, 0.505647}
```

```
N[{p22, t22, dd2} /. p12p22genmt12 /. dd12genmt12 /. sympar /.
  {s → 0.2, m → 0.05, α → 90} /. t12 → 1 - t22 /. {t22 → %}]
{{0.0089782, 0.400929, 0.504566},
 {0.0971816, 0.419647, 0.505647}, {0.106949, 0.300276, 0.202146}}
```

Only third solution admissible

```
Select[
  t22 /. NSolve[(symfacdelta3 /. {s → 0.2, m → 0.05, α → 94.3}) == 0, t22, Reals], 0 < # < 1 &]
{0.161008, 0.39319, 0.505436, 0.99997}
```

```
N[{p22, t22, dd2} /. p12p22genmt12 /. dd12genmt12 /. sympar /.
  {s → 0.2, m → 0.05, α → 94.3} /. t12 → 1 - t22 /. {t22 → %}]
{{0.0877299, 0.369058, 0.504417, 1.12502},
 {0.161008, 0.39319, 0.505436, 0.99997}, {0.164285, 0.292497, 0.203138, 0.0000380353}}
```

Only third solution admissible

```
Select[t22 /. NSolve[(symfacdelta3 /. {s → 0.2, m → 0.05, α → 97.95}) == 0, t22, Reals],
  0 < # < 1 &]
{0.299276, 0.30306, 0.50527, 0.995122}
```

```
N[{p22, t22, dd2} /. p12p22genmt12 /. dd12genmt12 /. sympar /.
  {s → 0.2, m → 0.05, α → 97.95} /. t12 → 1 - t22 /. {t22 → %}]
{{0.255633, 0.260209, 0.504299, 1.11629},
 {0.299276, 0.30306, 0.50527, 0.995122}, {0.255308, 0.257172, 0.203932, 0.00604205}}
```

Only third solution admissible

```
Select[t22 /. NSolve[(symfacdelta3 /. {s → 0.2, m → 0.05, α → 97.96}) == 0, t22, Reals],
  0 < # < 1 &]
{0.505269, 0.995107}
```

```
N[{p22, t22, dd2} /. p12p22genmt12 /. dd12genmt12 /. sympar /.
  {s → 0.2, m → 0.05, α → 97.96} /. t12 → 1 - t22 /. {t22 → %}]
{{0.504299, 1.11627}, {0.505269, 0.995107}, {0.203934, 0.00606001}}
```

Only first solution admissible

```
Select[
  t22 /. NSolve[(symfacdelta3 /. {s → 0.2, m → 0.05, α → 100}) == 0, t22, Reals], 0 < # < 1 &]
{0.505181, 0.991945}
```

```
N[{p22, t22, dd2} /. p12p22genmt12 /. dd12genmt12 /. sympar /.
  {s → 0.2, m → 0.05, α → 100} /. t12 → 1 - t22 /. {t22 → %}]
{{0.504236, 1.11091}, {0.505181, 0.991945}, {0.20436, 0.00992283}}
```

Only first solution admissible

```
Select[
  t22 /. NSolve[(symfacdelta3 /. {s → 0.2, m → 0.05, α → 125}) == 0, t22, Reals], 0 < # < 1 &]
{0.504314, 0.747811}
```

```
N[{p22, t22, dd2} /. p12p22genmt12 /. dd12genmt12 /. sympar /.
  {s → 0.2, m → 0.05, α → 125} /. t12 → 1 - t22 /. {t22 → %}]
{{0.503603, 0.79881}, {0.504314, 0.747811}, {0.208752, 0.227402}}
```

Only first solution admissible

```
Select[
  t22 /. NSolve[(symfacdelta3 /. {s → 0.2, m → 0.05, α → 1000}) == 0, t22, Reals], 0 < # < 1 &]
{0.500721, 0.501315}
```

```
N[{p22, t22, dd2} /. p12p22genmt12 /. dd12genmt12 /. sympar /.
  {s → 0.2, m → 0.05, α → 1000} /. t12 → 1 - t22 /. {t22 → %}]
{{0.500676, 0.501401}, {0.500721, 0.501315}, {0.234556, 0.266461}}
```

Only first solution admissible

```
Select[
  t22 /. NSolve[(symfacdelta3 /. {s → 0.2, m → 0.01, α → 1000}) == 0, t22, Reals], 0 < # < 1 &]
{0.493048, 0.501857}
```

```
N[{p22, t22, dd2} /. p12p22genmt12 /. dd12genmt12 /. sympar /.
  {s → 0.2, m → 0.01, α → 1000} /. t12 → 1 - t22 /. {t22 → %}]
{{0.492591, 0.501742}, {0.493048, 0.501857}, {0.266387, 0.23455}}
```

Only second solution admissible

```
Select[t22 /. NSolve[(symfacdelta3 /. {s → 0.2, m → 0.01, α → 100000}) == 0, t22, Reals],
  0 < # < 1 &]
{0.50004, 0.500054}
```

```
N[{p22, t22, dd2} /. p12p22genmt12 /. dd12genmt12 /. sympar /.
  {s → 0.2, m → 0.01, α → 100000} /. t12 → 1 - t22 /. {t22 → %}]
{{0.500039, 0.500055}, {0.50004, 0.500054}, {0.248411, 0.251599}}
```

Only first solution admissible

## 2.2.4 Summary for symmetric parameters

In all cases, numerics suggests that only one (symmetric) equilibrium exists (see below), although there may be up to four solutions for  $t_{22}$  between 0 and 1.

If  $\alpha$  is small enough such that there is one solution  $t_{22}$  with  $0 < t_{22} < 0.5$ , and another with  $0.5 < t_{22} < 1$ , then only the second gives rise to an (admissible) equilibrium.

If alpha is very large, then numerics suggests that there are between two and four solutions  $t_{22}$ . Numerics suggests that there is exactly one admissible equilibrium, and it arises from the the value  $t_{22}$  that is closest to 0.5 (and  $>0.5$ ).

All our numerical results from iteration of the recursion relations show that there is a single stable polymorphic equilibrium.

## 2.2.5 Efficient numerical computation of equilibria with symmetric parameters

One can use FindRoot or NSolve (the latter is efficient only in the symmetric case)

The following assumes symmetric parameters, but not  $t_{12} = 1 - t_{22}$ :

Table[

```
FindRoot[{factdelta3maler1 /. p12p22genmt12 /. dd12genmt12 /. sympar /. {s → 0.2, α → αα,
m → 0.01}, factdelta6maler1 /. p12p22genmt12 /. dd12genmt12 /. sympar /.
{s → 0.2, α → αα, m → 0.01}} == 0, {{t12, 0.45}, {t22, 0.6}}],
{αα, {0.001, 0.01, 0.05, 0.1, 0.25, 0.5, 0.75, 1}}]
```

FindRoot: Failed to converge to the requested accuracy or precision within 100 iterations.

FindRoot: Failed to converge to the requested accuracy or precision within 100 iterations.

```
{ {t12 → 0.098712, t22 → 0.902744}, {t12 → 0.0983662, t22 → 0.902383},
{t12 → 0.0982358, t22 → 0.901764}, {t12 → 0.0989614, t22 → 0.901039},
{t12 → 0.103525, t22 → 0.896475}, {t12 → 0.117885, t22 → 0.882115},
{t12 → 0.139931, t22 → 0.860069}, {t12 → 0.168621, t22 → 0.831379} }
```

The following yields all possible values for  $t_{22}$  (by solving  $\text{factdelta3maler1}=0$ ). Not all of them yield equilibria!

Table[

```
Select[t22 /. NSolve[{factdelta3maler1 /. p12p22genmt12 /. dd12genmt12 /. t12 → 1 - t22 /.
{s → 0.2, α → αα, m → 0.01}} == 0, t22, Reals],
1 > # > 0 &], {αα, {0.001, 0.01, 0.05, 0.1, 0.25, 0.5, 0.75, 1}}]
```

```
{ {0.476327, 0.90202}, {0.476327, 0.90201}, {0.47633, 0.901764}, {0.476339, 0.901039},
{0.476396, 0.896475}, {0.476553, 0.882115}, {0.476755, 0.860069}, {0.47698, 0.831379} }
```

The above routine based on FindRoot yields always symmetric equilibrium. Assuming symmetry  $t_{12} = 1 - t_{22}$ , we can use NSolve efficiently to obtain more accurate values in a shorter time.

The following computes the admissible polymorphic symmetric equilibria for the values  $\alpha$  specified (in this first case :  $\alpha \in \{0.001, 0.01, 0.05, 0.1, 0.25, 0.5, 0.75, 1\}$ ):

```

params[αα_] := {s1 → 0.2, s2 → 0.2, m1 → 0.01, m2 → 0.01, α1 → αα, α2 → αα};
Table[t22val = Select[
  t22 /. NSolve[{factdelta3maler1 /. p12p22genmt12 /. dd12genmt12 /. t12 → 1 - t22 /.
    params[αα]} == 0, t22, Reals], 0 < # < 1 &];
Flatten[Table[Select[{p22, t22val[[i]], dd2} /. p12p22genmt12 /. dd12genmt12 /.
  {t12 → 1 - t22val[[i]], t22 → t22val[[i]]} /. params[αα],
  0 < #[[1]] < 1 && 0 < #[[2]] < 1 && -Min[(1 - #[[1]]) (1 - #[[2]]), #[[1]] #[[2]]] ≤
  #[[3]] ≤ Min[#[[1]] (1 - #[[2]]), #[[2]] (1 - #[[1]])] &],
  {i, 1, Length[t22val]}], 2], {αα, {0.001, 0.01, 0.05, 0.1, 0.25, 0.5, 0.75, 1}}]
{{0.500093, 0.90202, 0.0000204374}, {0.500925, 0.90201, 0.00020348},
{0.504535, 0.901764, 0.000999981}, {0.508844, 0.901039, 0.00196637},
{0.520476, 0.896475, 0.00479307}, {0.535896, 0.882115, 0.00976864},
{0.546767, 0.860069, 0.0156316}, {0.553442, 0.831379, 0.0226084}}

```

The following uses FindRoot (and can also detect asymmetric equilibria) and gives only (t12,t22) (further below, in the asymmetric case, there is a routine giving all coordinates):

```

Table[
  FindRoot[{factdelta3maler1 /. p12p22genmt12 /. dd12genmt12 /. sympar /. {s → 0.2, α → αα,
    m → 0.01}, factdelta6maler1 /. p12p22genmt12 /. dd12genmt12 /. sympar /.
    {s → 0.2, α → αα, m → 0.01}} == 0, {{t12, 0.4}, {t22, 0.59}}],
  {αα, {0.001, 0.01, 0.05, 0.1, 0.25, 0.5, 0.75, 1}}]

```

FindRoot: Failed to converge to the requested accuracy or precision within 100 iterations.

FindRoot: Failed to converge to the requested accuracy or precision within 100 iterations.

```

{{t12 → 0.0978138, t22 → 0.901853}, {t12 → 0.0978451, t22 → 0.901864},
{t12 → 0.0982358, t22 → 0.901764}, {t12 → 0.0989614, t22 → 0.901039},
{t12 → 0.103525, t22 → 0.896475}, {t12 → 0.117885, t22 → 0.882115},
{t12 → 0.139931, t22 → 0.860069}, {t12 → 0.168621, t22 → 0.831379}}

```

```

params[αα_] := {s1 → 0.2, s2 → 0.2, m1 → 0.01, m2 → 0.01, α1 → αα, α2 → αα};
Table[t22val = Select[
  t22 /. NSolve[{factdelta3maler1 /. p12p22genmt12 /. dd12genmt12 /. t12 → 1 - t22 /.
    params[αα]} == 0, t22, Reals], 0 < # < 1 &];
Flatten[Table[Select[{p22, t22val[[i]], dd2} /. p12p22genmt12 /. dd12genmt12 /.
  {t12 → 1 - t22val[[i]], t22 → t22val[[i]]} /. params[αα],
  0 < #[[1]] < 1 && 0 < #[[2]] < 1 && -Min[(1 - #[[1]]) (1 - #[[2]]), #[[1]] #[[2]]] ≤
  #[[3]] ≤ Min[#[[1]] (1 - #[[2]]), #[[2]] (1 - #[[1]])] &],
  {i, 1, Length[t22val]}], 2], {αα, 1, 10, 1}]
{{0.553442, 0.831379, 0.0226084}, {0.554653, 0.712148, 0.0528098},
{0.54738, 0.646059, 0.0741773}, {0.541623, 0.611262, 0.088893},
{0.537354, 0.590418, 0.0999034}, {0.534092, 0.576623, 0.108622},
{0.531514, 0.566826, 0.11579}, {0.529416, 0.559502, 0.121844},
{0.52767, 0.553812, 0.127059}, {0.526187, 0.549256, 0.131621}}

```

Table[

```
FindRoot[{factdelta3maler1 /. p12p22genmt12 /. dd12genmt12 /. sympar /. {s → 0.2, α → αα,
m → 0.01}, factdelta6maler1 /. p12p22genmt12 /. dd12genmt12 /. sympar /.
{s → 0.2, α → αα, m → 0.01}} == 0, {{t12, 0.4}, {t22, 0.59}}, {αα, 1, 10, 1}]
```

```
{ {t12 → 0.168621, t22 → 0.831379}, {t12 → 0.287852, t22 → 0.712148},
{t12 → 0.353941, t22 → 0.646059}, {t12 → 0.388738, t22 → 0.611262},
{t12 → 0.409582, t22 → 0.590418}, {t12 → 0.423377, t22 → 0.576623},
{t12 → 0.433174, t22 → 0.566826}, {t12 → 0.440498, t22 → 0.559502},
{t12 → 0.446188, t22 → 0.553812}, {t12 → 0.450744, t22 → 0.549256} }
```

```
params[αα_] := {s1 → 0.2, s2 → 0.2, m1 → 0.01, m2 → 0.01, α1 → αα, α2 → αα};
```

Table[t22val = Select[

```
t22 /. NSolve[{factdelta3maler1 /. p12p22genmt12 /. dd12genmt12 /. t12 → 1 - t22 /.
params[αα]} == 0, t22, Reals], 0 < # < 1 &];
```

```
Flatten[Table[Select[{{p22, t22val[[i]], dd2}} /. p12p22genmt12 /. dd12genmt12 /.
{t12 → 1 - t22val[[i]], t22 → t22val[[i]]} /. params[αα],
0 < #[[1]] < 1 && 0 < #[[2]] < 1 && -Min[(1 - #[[1]]) (1 - #[[2]])], #[[1]] #[[2]]] ≤
#[[3]] ≤ Min[#[[1]] (1 - #[[2]])], #[[2]] (1 - #[[1]])] &],
{i, 1, Length[t22val]}, 2], {αα, 10, 100, 10}]
```

```
{ {0.526187, 0.549256, 0.131621}, {0.518125, 0.5284, 0.159031},
{0.514554, 0.521014, 0.172838}, {0.512429, 0.517089, 0.181619},
{0.510983, 0.514603, 0.187862}, {0.509917, 0.512863, 0.192606},
{0.50909, 0.511566, 0.196374}, {0.508425, 0.510555, 0.199465},
{0.507875, 0.50974, 0.202061}, {0.507411, 0.509067, 0.204284} }
```

For larger  $\alpha$  (and FindRoot), it is important to have initial values close to 0.5 (but not both at 0.5 because the denominator vanishes if  $t12=t22$ )

Table[FindRoot[

```
{factdelta3maler1 /. p12p22genmt12 /. dd12genmt12 /. {s → 0.2, α → αα, m → 0.01},
factdelta6maler1 /. p12p22genmt12 /. dd12genmt12 /. {s → 0.2, α → αα, m → 0.01}} == 0,
{{t12, 0.49}, {t22, 0.52}}, {αα, 10, 100, 10}]
```

```
{ {t12 → 0.450744, t22 → 0.549256}, {t12 → 0.4716, t22 → 0.5284},
{t12 → 0.478986, t22 → 0.521014}, {t12 → 0.482911, t22 → 0.517089},
{t12 → 0.485397, t22 → 0.514603}, {t12 → 0.487137, t22 → 0.512863},
{t12 → 0.488434, t22 → 0.511566}, {t12 → 0.489445, t22 → 0.510555},
{t12 → 0.49026, t22 → 0.50974}, {t12 → 0.490933, t22 → 0.509067} }
```

```
params[αα_] := {s1 → 0.2, s2 → 0.2, m1 → 0.01, m2 → 0.01, α1 → αα, α2 → αα};
```

Table[t22val = Select[

```
t22 /. NSolve[{factdelta3maler1 /. p12p22genmt12 /. dd12genmt12 /. t12 → 1 - t22 /.
params[αα]} == 0, t22, Reals], 0 < # < 1 &];
```

```
Flatten[Table[Select[{{p22, t22val[[i]], dd2}} /. p12p22genmt12 /. dd12genmt12 /.
{t12 → 1 - t22val[[i]], t22 → t22val[[i]]} /. params[αα],
0 < #[[1]] < 1 && 0 < #[[2]] < 1 && -Min[(1 - #[[1]]) (1 - #[[2]])], #[[1]] #[[2]]] ≤
#[[3]] ≤ Min[#[[1]] (1 - #[[2]])], #[[2]] (1 - #[[1]])] &],
{i, 1, Length[t22val]}, 2], {αα, 100, 1000, 100}]
```

```
{ {0.507411, 0.509067, 0.204284}, {0.504919, 0.505673, 0.216745},
{0.503834, 0.504308, 0.222503}, {0.503198, 0.503537, 0.226006},
{0.50277, 0.503031, 0.228428}, {0.502458, 0.502669, 0.230233},
{0.502219, 0.502395, 0.231645}, {0.502029, 0.502178, 0.232789},
{0.501872, 0.502003, 0.233741}, {0.501742, 0.501857, 0.23455} }
```

```

Table[
  FindRoot[{factdelta3maler1 /. p12p22genmt12 /. dd12genmt12 /. sympar /. {s → 0.2, α → αα,
    m → 0.01}, factdelta6maler1 /. p12p22genmt12 /. dd12genmt12 /. sympar /.
    {s → 0.2, α → αα, m → 0.01}} == 0,
    {{t12, 0.498}, {t22, 0.501}}, {αα, 100, 1000, 100}]
{ {t12 → 0.490933, t22 → 0.509067}, {t12 → 0.494327, t22 → 0.505673},
  {t12 → 0.495692, t22 → 0.504308}, {t12 → 0.496463, t22 → 0.503537},
  {t12 → 0.496969, t22 → 0.503031}, {t12 → 0.497331, t22 → 0.502669},
  {t12 → 0.497605, t22 → 0.502395}, {t12 → 0.497822, t22 → 0.502178},
  {t12 → 0.497997, t22 → 0.502003}, {t12 → 0.498143, t22 → 0.501857} }

params[αα_] := {s1 → 0.2, s2 → 0.2, m1 → 0.01, m2 → 0.01, α1 → αα, α2 → αα};
Table[t22val = Select[
  t22 /. NSolve[{factdelta3maler1 /. p12p22genmt12 /. dd12genmt12 /. t12 → 1 - t22 /.
    params[αα]} == 0, t22, Reals], 0 < # < 1 &];
Flatten[Table[Select[{{p22, t22val[[i]], dd2}} /. p12p22genmt12 /. dd12genmt12 /.
  {t12 → 1 - t22val[[i]], t22 → t22val[[i]]} /. params[αα],
  0 < #[[1]] < 1 && 0 < #[[2]] < 1 && -Min[(1 - #[[1]]) (1 - #[[2]]), #[[1]] #[[2]]] ≤
  #[[3]] ≤ Min[#[[1]] (1 - #[[2]]), #[[2]] (1 - #[[1]])] &],
  {i, 1, Length[t22val]}], 2], {αα, {1000, 10000, 100000}}]
{ {0.501742, 0.501857, 0.23455},
  {0.500303, 0.500309, 0.245009}, {0.500039, 0.50004, 0.248411} }

```

The above shows that always a single admissible polymorphic equilibrium is found.

## 2.2.6 Asymmetric parameters

The above routine with FindRoot can also be used to find the equilibrium for asymmetric parameters (below, we also compute all coordinates and check admissibility):

```

params[αα_] := {s1 → 0.1, s2 → 0.2, m1 → 0.01, m2 → 0.01, α1 → 1.1 αα, α2 → αα};
Table[t12t22 = FindRoot[{factdelta3maler1 /. p12p22genmt12 /. dd12genmt12 /. params[αα],
  factdelta6maler1 /. p12p22genmt12 /. dd12genmt12 /. params[αα]} == 0,
  {{t12, 0.45}, {t22, 0.56}}]; Flatten[
  Select[{{p12, t12, dd1, p22, t22, dd2}} /. p12p22genmt12 /. dd12genmt12 /. t12t22 /.
    params[αα], 0 < #[[1]] < 1 && 0 < #[[2]] < 1 &&
    -Min[(1 - #[[1]]) (1 - #[[2]]), #[[1]] #[[2]]] ≤ #[[3]] ≤ Min[#[[1]] (1 - #[[2]]),
    #[[2]] (1 - #[[1]])] && 0 < #[[4]] < 1 && 0 < #[[5]] < 1 &], 1], {αα, 1, 10, 1}]

```

```

params[α_] := {s1 → 0.1, s2 → 0.2, m1 → 0.01, m2 → 0.01, α1 → 10 α, α2 → 10};
Table[t12t22 = FindRoot[{factdelta3maler1 /. p12p22genmt12 /. dd12genmt12 /. params[α],
  factdelta6maler1 /. p12p22genmt12 /. dd12genmt12 /. params[α]} == 0,
  {{t12, 0.45}, {t22, 0.56}}]; Flatten[
  Select[{p12, t12, dd1, p22, t22, dd2} /. p12p22genmt12 /. dd12genmt12 /. t12t22 /.
    params[α],
    0 < #[[1]] < 1 && 0 < #[[2]] < 1 && -Min[(1 - #[[1]]) (1 - #[[2]]), #[[1]] #[[2]]] ≤
      #[[3]] ≤ Min[#[[1]] (1 - #[[2]]), #[[2]] (1 - #[[1]])] &&
      0 < #[[4]] < 1 && 0 < #[[5]] < 1 &], 1], {α, 1, 2, 0.1}]
  {{0.448264, 0.429257, 0.130693, 0.488207, 0.504134, 0.133354},
  {0.480468, 0.463931, 0.134674, 0.519532, 0.536069, 0.134674},
  {0.509607, 0.495146, 0.137072, 0.547686, 0.56459, 0.134798},
  {0.536013, 0.523308, 0.138245, 0.573052, 0.590143, 0.134043},
  {0.559995, 0.548783, 0.138479, 0.595974, 0.613117, 0.132654},
  {0.581829, 0.571893, 0.138, 0.616749, 0.633846, 0.130815},
  {0.601761, 0.592923, 0.136982, 0.635639, 0.652617, 0.128664},
  {0.620005, 0.612116, 0.135565, 0.652869, 0.669675, 0.126304},
  {0.636751, 0.629687, 0.133853, 0.668633, 0.685228, 0.123813},
  {0.652163, 0.645818, 0.131931, 0.6831, 0.699456, 0.121249},
  {0.666384, 0.66067, 0.12986, 0.696414, 0.712512, 0.118654}}

```

For large  $\alpha$ , numerical problems may occur:

```

params[α_] := {s1 → 0.2, s2 → 0.2, m1 → 0.01, m2 → 0.01, α1 → 1.1 α, α2 → α};
Table[t12t22 = FindRoot[{factdelta3maler1 /. p12p22genmt12 /. dd12genmt12 /. params[α],
  factdelta6maler1 /. p12p22genmt12 /. dd12genmt12 /. params[α]} == 0,
  {{t12, 0.49}, {t22, 0.51}}, MaxIterations → 200, PrecisionGoal → 8];
Flatten[Select[{p12, t12, dd1, p22, t22, dd2} /. p12p22genmt12 /. dd12genmt12 /.
  t12t22 /. params[α],
  0 < #[[1]] < 1 && 0 < #[[2]] < 1 && -Min[(1 - #[[1]]) (1 - #[[2]]), #[[1]] #[[2]]] ≤
    #[[3]] ≤ Min[#[[1]] (1 - #[[2]]), #[[2]] (1 - #[[1]])] &&
    0 < #[[4]] < 1 && 0 < #[[5]] < 1 &], 1], {α, 100, 1000, 100}]

```

FindRoot: The line search decreased the step size to within tolerance specified by AccuracyGoal and PrecisionGoal but was unable to find a sufficient decrease in the merit function. You may need more than MachinePrecision digits of working precision to meet these tolerances.

FindRoot: Failed to converge to the requested accuracy or precision within 200 iterations.

FindRoot: The line search decreased the step size to within tolerance specified by AccuracyGoal and PrecisionGoal but was unable to find a sufficient decrease in the merit function. You may need more than MachinePrecision digits of working precision to meet these tolerances.

FindRoot: The line search decreased the step size to within tolerance specified by AccuracyGoal and PrecisionGoal but was unable to find a sufficient decrease in the merit function. You may need more than MachinePrecision digits of working precision to meet these tolerances.

General: Further output of FindRoot::lstol will be suppressed during this calculation.

```

  {{0.518598, 0.517069, 0.205057, 0.53299, 0.534594, 0.204313},
  {0.520327, 0.519626, 0.217148, 0.529867, 0.530593, 0.216669},
  {0.521087, 0.520645, 0.222734, 0.528517, 0.528971, 0.222365},
  {}, {}, {}, {}, {}, {}, {}

```

```

params[αα_] := {s1 → 0.2, s2 → 0.2, m1 → 0.01, m2 → 0.01, α1 → 1.1 αα, α2 → αα};
Table[t12t22 = FindRoot[{factdelta3maler1 /. p12p22genmt12 /. dd12genmt12 /. params[αα],
  factdelta6maler1 /. p12p22genmt12 /. dd12genmt12 /. params[αα]} == 0,
  {{t12, 0.52}, {t22, 0.53}}, MaxIterations → 200]; Flatten[
  Select[{p12, t12, dd1, p22, t22, dd2} /. p12p22genmt12 /. dd12genmt12 /. t12t22 /.
    params[αα],
    0 < #[[1]] < 1 && 0 < #[[2]] < 1 && -Min[(1 - #[[1]]) (1 - #[[2]]), #[[1]] #[[2]]] ≤
      #[[3]] ≤ Min[#[[1]] (1 - #[[2]]), #[[2]] (1 - #[[1]])] &&
      0 < #[[4]] < 1 && 0 < #[[5]] < 1 &], 1], {αα, 100, 1000, 100}]
  {{0.518598, 0.517069, 0.205057, 0.53299, 0.534594, 0.204313},
  {0.520327, 0.519626, 0.217148, 0.529867, 0.530593, 0.216669},
  {0.521087, 0.520645, 0.222734, 0.528517, 0.528971, 0.222365},
  {0.521535, 0.521218, 0.226133, 0.527728, 0.528053, 0.225828},
  {0.521837, 0.521593, 0.228484, 0.527199, 0.527448, 0.228221}, {}, {}, {}, {}, {}

```

## ■ 3. Numerics

### 3.1 Checking convergence by iteration

The following routine is quite useful to check convergence with a limited output

```
testdif[n_][x_, y_] := If[Max[Abs[x - y]] < 10.^(-n), False, True]
```

In general, n = 10 worked very well (see also below)

```

tend1 = 200;
tend2 = 10;
res = Table[{0, 0, 0, 0, 0, 0}, {i, 1, tend2 + 1}];
res[[1]] = {0.5, 0.5, 0, 0.5, 0.5, 0};
Table[res[[i + 1]] = NestWhile[Chop[itgenmale[0.2, 0.2, 10, 10, 0.01, 0.01, 0.5]],
  res[[i]], testdif[10], 2, tend1, -1], {i, 1, tend2}] // AbsoluteTiming
{1.20132, {{0.474167, 0.45117, 0.131649, 0.525833, 0.54883, 0.131649},
  {0.473819, 0.450751, 0.131622, 0.526181, 0.549249, 0.131622},
  {0.473813, 0.450744, 0.131621, 0.526187, 0.549256, 0.131621},
  {0.473813, 0.450744, 0.131621, 0.526187, 0.549256, 0.131621},
  {0.473813, 0.450744, 0.131621, 0.526187, 0.549256, 0.131621},
  {0.473813, 0.450744, 0.131621, 0.526187, 0.549256, 0.131621},
  {0.473813, 0.450744, 0.131621, 0.526187, 0.549256, 0.131621},
  {0.473813, 0.450744, 0.131621, 0.526187, 0.549256, 0.131621},
  {0.473813, 0.450744, 0.131621, 0.526187, 0.549256, 0.131621},
  {0.473813, 0.450744, 0.131621, 0.526187, 0.549256, 0.131621}}}

```

Starting with asymmetric initial conditions, if parameters are symmetric, is much slower:



```

tend1 = 5000;
tend2 = 10;
res = Table[{0, 0, 0, 0, 0, 0}, {i, 1, tend2 + 1}];
res[[1]] = {.45, .5, 0, .5, .52, 0};
Table[res[[i + 1]] = NestWhile[Chop[itgenmale[0.2, 0.2, 10, 10, 0.01, 0.01, 0.5]],
  res[[i]], UnsameQ, 2, tend1, -1], {i, 1, tend2}] // AbsoluteTiming
{75.0188, {{0.453186, 0.425906, 0.129647, 0.505515, 0.524363, 0.132868},
  {0.46466, 0.439722, 0.130835, 0.517025, 0.538224, 0.132265},
  {0.469754, 0.445856, 0.13129, 0.522126, 0.544366, 0.131924},
  {0.472013, 0.448576, 0.131478, 0.524387, 0.547088, 0.131759},
  {0.473015, 0.449783, 0.131558, 0.525389, 0.548295, 0.131683},
  {0.473459, 0.450317, 0.131593, 0.525833, 0.54883, 0.131649},
  {0.473656, 0.450555, 0.131609, 0.52603, 0.549067, 0.131633},
  {0.473744, 0.45066, 0.131616, 0.526117, 0.549173, 0.131627},
  {0.473782, 0.450706, 0.131619, 0.526156, 0.549219, 0.131624},
  {0.473799, 0.450727, 0.13162, 0.526173, 0.54924, 0.131622}}}

```

Convergence with asymmetric parameters is slow:

```

tend1 = 5000;
tend2 = 20;
res = Table[{0, 0, 0, 0, 0, 0}, {i, 1, tend2 + 1}];
res[[1]] = {.5, .5, 0, .5, .5, 0};
Table[res[[i + 1]] = NestWhile[Chop[itgenmale[0.2, 0.2, 10, 11, 0.01, 0.01, 0.5]],
  res[[i]], testdif[10], 2, tend1, -1], {i, 1, tend2}] // AbsoluteTiming
{109.315, {{0.458604, 0.438428, 0.133012, 0.509654, 0.533088, 0.134002},
  {0.450154, 0.428348, 0.13215, 0.501146, 0.522906, 0.134423},
  {0.446296, 0.423744, 0.131716, 0.497255, 0.518251, 0.134575},
  {0.444533, 0.421641, 0.131509, 0.495477, 0.516123, 0.134635},
  {0.443728, 0.42068, 0.131413, 0.494664, 0.51515, 0.134661},
  {0.44336, 0.420241, 0.131368, 0.494293, 0.514705, 0.134672},
  {0.443191, 0.42004, 0.131348, 0.494123, 0.514502, 0.134678},
  {0.443115, 0.419948, 0.131339, 0.494045, 0.514409, 0.13468},
  {0.443079, 0.419906, 0.131334, 0.49401, 0.514367, 0.134681},
  {0.443063, 0.419887, 0.131332, 0.493994, 0.514348, 0.134681},
  {0.443056, 0.419878, 0.131331, 0.493986, 0.514339, 0.134682},
  {0.443053, 0.419874, 0.131331, 0.493983, 0.514335, 0.134682},
  {0.443051, 0.419873, 0.131331, 0.493981, 0.514333, 0.134682},
  {0.44305, 0.419872, 0.131331, 0.493981, 0.514332, 0.134682},
  {0.44305, 0.419872, 0.131331, 0.49398, 0.514332, 0.134682},
  {0.44305, 0.419872, 0.131331, 0.49398, 0.514332, 0.134682},
  {0.44305, 0.419872, 0.131331, 0.49398, 0.514332, 0.134682},
  {0.44305, 0.419872, 0.131331, 0.49398, 0.514332, 0.134682},
  {0.44305, 0.419872, 0.131331, 0.49398, 0.514332, 0.134682},
  {0.44305, 0.419872, 0.131331, 0.49398, 0.514332, 0.134682}}}

```

The choice of n in testdif[n] influence accuracy and speed :

```

tend1 = 5000;
tend2 = 20;
res = Table[{0, 0, 0, 0, 0, 0}, {i, 1, tend2 + 1}];
res[[1]] = {.5, .5, 0, .5, .5, 0};
Table[res[[i + 1]] = NestWhile[Chop[itgenmale[0.2, 0.2, 10, 11, 0.01, 0.01, 0.5]],
  res[[i]], testdif[8], 2, tend1, -1], {i, 1, tend2}] // AbsoluteTiming
{60.4561, {{0.458604, 0.438428, 0.133012, 0.509654, 0.533088, 0.134002},
  {0.450154, 0.428348, 0.13215, 0.501146, 0.522906, 0.134423},
  {0.446296, 0.423744, 0.131716, 0.497255, 0.518251, 0.134575},
  {0.444533, 0.421641, 0.131509, 0.495477, 0.516123, 0.134635},
  {0.443728, 0.42068, 0.131413, 0.494664, 0.51515, 0.134661},
  {0.44336, 0.420241, 0.131368, 0.494293, 0.514705, 0.134672},
  {0.443191, 0.42004, 0.131348, 0.494123, 0.514502, 0.134678},
  {0.443115, 0.419948, 0.131339, 0.494045, 0.514409, 0.13468},
  {0.443103, 0.419934, 0.131337, 0.494033, 0.514395, 0.13468},
  {0.443103, 0.419934, 0.131337, 0.494033, 0.514395, 0.13468},
  {0.443103, 0.419934, 0.131337, 0.494033, 0.514395, 0.13468},
  {0.443103, 0.419934, 0.131337, 0.494033, 0.514395, 0.13468},
  {0.443103, 0.419934, 0.131337, 0.494033, 0.514395, 0.13468},
  {0.443103, 0.419934, 0.131337, 0.494033, 0.514395, 0.13468},
  {0.443103, 0.419934, 0.131337, 0.494033, 0.514395, 0.13468},
  {0.443103, 0.419934, 0.131337, 0.494033, 0.514395, 0.13468},
  {0.443103, 0.419934, 0.131337, 0.494033, 0.514395, 0.13468},
  {0.443103, 0.419934, 0.131337, 0.494033, 0.514395, 0.13468},
  {0.443103, 0.419934, 0.131337, 0.494033, 0.514395, 0.13468},
  {0.443103, 0.419934, 0.131337, 0.494033, 0.514395, 0.13468}}}

tend1 = 5000;
tend2 = 20;
res = Table[{0, 0, 0, 0, 0, 0}, {i, 1, tend2 + 1}];
res[[1]] = {.5, .5, 0, .5, .5, 0};
Table[res[[i + 1]] = NestWhile[Chop[itgenmale[0.2, 0.2, 10, 11, 0.01, 0.01, 0.5]],
  res[[i]], UnsameQ, 2, tend1, -1], {i, 1, tend2}] // AbsoluteTiming
{157.968, {{0.458604, 0.438428, 0.133012, 0.509654, 0.533088, 0.134002},
  {0.450154, 0.428348, 0.13215, 0.501146, 0.522906, 0.134423},
  {0.446296, 0.423744, 0.131716, 0.497255, 0.518251, 0.134575},
  {0.444533, 0.421641, 0.131509, 0.495477, 0.516123, 0.134635},
  {0.443728, 0.42068, 0.131413, 0.494664, 0.51515, 0.134661},
  {0.44336, 0.420241, 0.131368, 0.494293, 0.514705, 0.134672},
  {0.443191, 0.42004, 0.131348, 0.494123, 0.514502, 0.134678},
  {0.443115, 0.419948, 0.131339, 0.494045, 0.514409, 0.13468},
  {0.443079, 0.419906, 0.131334, 0.49401, 0.514367, 0.134681},
  {0.443063, 0.419887, 0.131332, 0.493994, 0.514348, 0.134681},
  {0.443056, 0.419878, 0.131331, 0.493986, 0.514339, 0.134682},
  {0.443053, 0.419874, 0.131331, 0.493983, 0.514335, 0.134682},
  {0.443051, 0.419873, 0.131331, 0.493981, 0.514333, 0.134682},
  {0.44305, 0.419872, 0.131331, 0.493981, 0.514332, 0.134682},
  {0.44305, 0.419871, 0.131331, 0.49398, 0.514332, 0.134682},
  {0.44305, 0.419871, 0.131331, 0.49398, 0.514331, 0.134682},
  {0.44305, 0.419871, 0.131331, 0.49398, 0.514331, 0.134682},
  {0.44305, 0.419871, 0.131331, 0.49398, 0.514331, 0.134682},
  {0.44305, 0.419871, 0.131331, 0.49398, 0.514331, 0.134682},
  {0.44305, 0.419871, 0.131331, 0.49398, 0.514331, 0.134682}}}

```

With symmetric initial conditions, convergence is fast, even if  $r$  is small:

```

tend1 = 500;
tend2 = 10;
res = Table[{0, 0, 0, 0, 0, 0}, {i, 1, tend2 + 1}];
res[[1]] = {.05, .05, .95 * .05, .95, .95, .95 * .05};
Table[res[[i + 1]] = NestWhile[Chop[itgenmale[0.2, 0.2, 10, 10, 0.01, 0.01, 0.01]],
  res[[i]], testdif[10], 2, tend1, -1], {i, 1, tend2}] // AbsoluteTiming
{5.05205, {{0.23517, 0.178562, 0.115365, 0.76483, 0.821438, 0.115365},
  {0.468958, 0.445133, 0.137371, 0.531042, 0.554867, 0.137371},
  {0.473533, 0.450421, 0.131995, 0.526467, 0.549579, 0.131995},
  {0.473796, 0.450723, 0.131645, 0.526204, 0.549277, 0.131645},
  {0.473812, 0.450742, 0.131623, 0.526188, 0.549258, 0.131623},
  {0.473813, 0.450744, 0.131621, 0.526187, 0.549256, 0.131621},
  {0.473813, 0.450744, 0.131621, 0.526187, 0.549256, 0.131621},
  {0.473813, 0.450744, 0.131621, 0.526187, 0.549256, 0.131621},
  {0.473813, 0.450744, 0.131621, 0.526187, 0.549256, 0.131621},
  {0.473813, 0.450744, 0.131621, 0.526187, 0.549256, 0.131621}}}

```

Extremely slow convergence with high, but not maximum, initial LD and asymmetric starting conditions:

```

tend1 = 20000;
tend2 = 10;
res = Table[{0, 0, 0, 0, 0, 0}, {i, 1, tend2 + 1}];
res[[1]] = {.05, .05, .95 * .05, .95, .95, .95 * .02};
Table[res[[i + 1]] = NestWhile[Chop[itgenmale[0.2, 0.2, 10, 10, 0.01, 0.01, 0.01]],
  res[[i]], testdif[10], 2, tend1, -1], {i, 1, tend2}] // AbsoluteTiming
{302.676, {{0.0759545, 0.000998444, 0.000427325, 0.0818185, 0.0145912, 0.0062369},
  {0.0940498, 0.0074737, 0.00336732, 0.115874, 0.0550877, 0.0240694},
  {0.256616, 0.189562, 0.078303, 0.303755, 0.281422, 0.104481},
  {0.370025, 0.325842, 0.115609, 0.42128, 0.422958, 0.129174},
  {0.424329, 0.391183, 0.126246, 0.476452, 0.489385, 0.132809},
  {0.450241, 0.422371, 0.12958, 0.502559, 0.520813, 0.132714},
  {0.462591, 0.437236, 0.130768, 0.514952, 0.535732, 0.13226},
  {0.468472, 0.444315, 0.131242, 0.520843, 0.542824, 0.131952},
  {0.471271, 0.447684, 0.131447, 0.523645, 0.546196, 0.131785},
  {0.472604, 0.449288, 0.13154, 0.524977, 0.5478, 0.1317}}}

```

Using FindRoot

## 3.2 3D Graphs

Here, we show by example how to produce the 3D graphs

### 3.2.1 Definitions

The following is itgenmale[s, s,  $\alpha$ ,  $\alpha$ , m, m, r][p12, t12, dd1, p22, t22, dd2] (but slightly faster)

```

itfastsym[s_,  $\alpha$ _, m_, r_] [{p12_, t12_, dd1_, p22_, t22_, dd2_}] :=
  {((-1 + m)2 m p122 (1 + s) (t12 - t22)  $\alpha$  (2 +  $\alpha$ ) + dd1 (s +  $\alpha$  + s  $\alpha$ ) (-1 + s (-1 + t12) - t12  $\alpha$ ) +
    m3 p22 (t12 - t22) (s2 (t12 - t22) (1 +  $\alpha$ ) +  $\alpha$  ((-t12 + t22)  $\alpha$  + p22 (2 +  $\alpha$ )) +
    s  $\alpha$  ((-t12 + t22)  $\alpha$  + p22 (2 +  $\alpha$ ))) + m (s +  $\alpha$  + s  $\alpha$ )

```

$$\begin{aligned}
& \left( dd2 (-1 + s (-1 + t12)) - t12 \alpha \right) + dd1 (1 + s (1 - 2 t12 + t22) + 2 t12 \alpha - t22 \alpha) + \\
& p22 (2 + (2 + 2 dd1 + t12 - t22) \alpha + (dd1 - t12 (-2 + t12 + t22)) \alpha^2 + \\
& s^2 (-1 + t12) (-2 + t12 + t22) (1 + \alpha) - s (-4 + t22 - 4 \alpha - 2 dd1 \alpha + \\
& 2 t22 \alpha - dd1 \alpha^2 + t12^2 \alpha^2 + t12 (3 + 2 \alpha + (-2 + t22) \alpha^2))) + \\
& m^2 (-p22^2 (1 + s) (t12 - t22) \alpha (2 + \alpha) + (dd1 - dd2) (t12 - t22) (s - \alpha) (s + \alpha + s \alpha) + \\
& p22 (-s^2 (2 t12^2 - (-3 + t22) t22 - t12 (3 + t22)) (1 + \alpha) - \alpha (dd1 (2 + \alpha) - \\
& dd2 (2 + \alpha) - (t12 - t22) (-1 + (-2 + 2 t12 + t22) \alpha)) + s (2 t12^2 \alpha^2 - t22^2 \alpha^2 - \\
& (dd1 - dd2) \alpha (2 + \alpha) + t22 (-3 - 2 \alpha + 2 \alpha^2) + t12 (3 + 2 \alpha - (2 + t22) \alpha^2))) - \\
& (-1 + m) p12 (2 + (2 - 2 dd1 (-1 + m) + 2 dd2 m - m t12 - 2 m p22 t12 + \\
& 4 m^2 p22 t12 + m t22 + 2 m p22 t22 - 4 m^2 p22 t22) \alpha + \\
& (dd1 - dd1 m + dd2 m + 2 t12 - 2 m t12 - m p22 t12 + 2 m^2 p22 t12 - 2 t12^2 + 3 m t12^2 - \\
& m^2 t12^2 + 2 m t22 + m p22 t22 - 2 m^2 p22 t22 - 3 m t12 t22 + 2 m^2 t12 t22 - m^2 t22^2) \alpha^2 + \\
& s^2 (2 + (2 - 3 m + m^2) t12^2 - 3 m t22 + m^2 t22^2 + t12 (-4 - 2 m^2 t22 + 3 m (1 + t22))) \\
& (1 + \alpha) + \\
& s (4 + 4 \alpha + 2 dd1 \alpha + dd1 \alpha^2 - (2 - 3 m + m^2) t12^2 \alpha^2 - m^2 t22 \alpha (t22 \alpha + 2 p22 (2 + \alpha)) + \\
& m (- (dd1 - dd2) \alpha (2 + \alpha) + t22 (-3 + 2 (-1 + p22) \alpha + (2 + p22) \alpha^2)) + \\
& t12 (2 (-2 - 2 \alpha + \alpha^2) - m (-3 + 2 (-1 + p22) \alpha + (2 + p22 + 3 t22) \alpha^2) + \\
& 2 m^2 \alpha (t22 \alpha + p22 (2 + \alpha)))))) / \\
& (2 (1 + (1 + (-1 + m) t12 - m t22) \alpha + s (1 + (-1 + m) t12 - m t22) (1 + \alpha)) \\
& (1 + s (1 + (-1 + m) t12 - m t22) + m t22 \alpha + t12 (\alpha - m \alpha))), \\
& - \left( ((-1 + m) t12 - m t22) (2 + p12 \alpha - m p12 \alpha + m p22 \alpha + 2 t12 \alpha - 2 m t12 \alpha - \right. \\
& p12 t12 \alpha + 2 m p12 t12 \alpha - m^2 p12 t12 \alpha - m p22 t12 \alpha + m^2 p22 t12 \alpha + 2 m t22 \alpha - \\
& m p12 t22 \alpha + m^2 p12 t22 \alpha - m^2 p22 t22 \alpha + s^2 (1 + (-1 + m) t12 - m t22)^2 (1 + \alpha) - \\
& s (1 + (-1 + m) t12 - m t22) (-3 + 2 (-1 + (-1 + m) p12 - m p22) \alpha + \\
& ((-1 + m) p12 - t12 - m (p22 - t12 + t22)) \alpha^2) - (1 + (-1 + m) t12 - m t22) \\
& \alpha (-1 - t12 \alpha + (-1 + m) p12 (1 + \alpha) - m (p22 + p22 \alpha - t12 \alpha + t22 \alpha))) / \\
& (2 (1 + (1 + (-1 + m) t12 - m t22) \alpha + s (1 + (-1 + m) t12 - m t22) (1 + \alpha)) \\
& (1 + s (1 + (-1 + m) t12 - m t22) + m t22 \alpha + t12 (\alpha - m \alpha))), \\
& \frac{1}{4} \left( - \left( ((dd1 (-1 + m) - dd2 m - p12 t12 + m p12 t12 - m p22 t22) (dd1 (-1 + m) - \right. \right. \\
& dd2 m + t12 - m t12 - p12 t12 + m p12 t12 + m t22 - m p22 t22) (1 + \alpha)) / \\
& (-1 + s (-1 + t12 - m t12 + m t22) + (-1 + m) t12 \alpha - m t22 \alpha) + \\
& ((-1 + r) (dd1 (-1 + m) - dd2 m + p12 - m p12 + m p22 - p12 t12 + m p12 t12 - m p22 t22) \\
& (dd1 (-1 + m) - dd2 m + t12 - m t12 - p12 t12 + m p12 t12 + m t22 - m p22 t22) \\
& (1 + \alpha)) / (-1 + s (-1 + t12 - m t12 + m t22) + (-1 + m) t12 \alpha - m t22 \alpha) - \\
& ((dd1 (-1 + m) - dd2 m - p12 t12 + m p12 t12 - m p22 t22) \\
& (dd1 (-1 + m) - dd2 m + t12 - m t12 - p12 t12 + m p12 t12 + m t22 - m p22 t22)) / \\
& (1 + (1 + (-1 + m) t12 - m t22) \alpha + s (1 + (-1 + m) t12 - m t22) (1 + \alpha)) + \\
& (r (dd1 (-1 + m) - dd2 m - p12 t12 + m p12 t12 - m p22 t22) (-1 + dd1 (-1 + m) - dd2 m + \\
& p12 - m p12 + m p22 + t12 - m t12 - p12 t12 + m p12 t12 + m t22 - m p22 t22)) / \\
& (1 + (1 + (-1 + m) t12 - m t22) \alpha + s (1 + (-1 + m) t12 - m t22) (1 + \alpha)) - \\
& ((dd1 (-1 + m) - dd2 m + t12 - m t12 - p12 t12 + m p12 t12 + m t22 - m p22 t22) \\
& (-1 + dd1 (-1 + m) - dd2 m + p12 - m p12 + m p22 + t12 - \\
& m t12 - p12 t12 + m p12 t12 + m t22 - m p22 t22)) / \\
& (1 + (1 + (-1 + m) t12 - m t22) \alpha + s (1 + (-1 + m) t12 - m t22) (1 + \alpha)) + \\
& (2 (dd1 - dd1 m + dd2 m - t12 + m t12 + p12 t12 - m p12 t12 - m t22 + m p22 t22)^2) / \\
& (1 + (1 + (-1 + m) t12 - m t22) \alpha + s (1 + (-1 + m) t12 - m t22) (1 + \alpha)) - \\
& ((-1 + r) (1 + s) (dd1 (-1 + m) - dd2 m + p12 - m p12 + m p22 - p12 t12 + \\
& m p12 t12 - m p22 t22) (dd1 (-1 + m) - dd2 m + t12 -
\end{aligned}$$

[illegible]

$$\begin{aligned}
& \left( -1 + dd1(-1+m) - dd2m + p12 - m p12 + m p22 + t12 - \right. \\
& \quad \left. m t12 - p12 t12 + m p12 t12 + m t22 - m p22 t22 \right) (1+\alpha) / \\
& \left( 1 + (1 + (-1+m) t12 - m t22) \alpha + s (1 + (-1+m) t12 - m t22) (1+\alpha) \right) - \\
& \left( (1+s) (dd1(-1+m) - dd2m + t12 - m t12 - p12 t12 + m p12 t12 + m t22 - m p22 t22) \right. \\
& \quad \left. (-1 + dd1(-1+m) - dd2m + p12 - m p12 + m p22 + t12 - \right. \\
& \quad \left. m t12 - p12 t12 + m p12 t12 + m t22 - m p22 t22) (1+\alpha) \right) / \\
& \left( 1 + (1 + (-1+m) t12 - m t22) \alpha + s (1 + (-1+m) t12 - m t22) (1+\alpha) \right) + \\
& \left( 2 (1+s) (-1 + dd1(-1+m) - dd2m + p12 - m p12 + m p22 + t12 - m \right. \\
& \quad \left. t12 - p12 t12 + m p12 t12 + m t22 - m p22 t22)^2 (1+\alpha) \right) / \\
& \left( 1 + (1 + (-1+m) t12 - m t22) \alpha + s (1 + (-1+m) t12 - m t22) (1+\alpha) \right) - \\
& \left( (-1+r) (1+s) (dd1(-1+m) - dd2m - p12 t12 + m p12 t12 - m p22 t22) \right. \\
& \quad \left. (-1 + dd1(-1+m) - dd2m + p12 - m p12 + m p22 + t12 - m t12 - p12 t12 + m p12 t12 + \right. \\
& \quad \left. m t22 - m p22 t22) \right) / (1+s (1 + (-1+m) t12 - m t22) + m t22 \alpha + t12 (\alpha - m \alpha)) - \\
& \left( (1+s) (dd1(-1+m) - dd2m + p12 - m p12 + m p22 - p12 t12 + m p12 t12 - m p22 t22) \right. \\
& \quad \left. (-1 + dd1(-1+m) - dd2m + p12 - m p12 + m p22 + t12 - m t12 - p12 t12 + m p12 t12 + \right. \\
& \quad \left. m t22 - m p22 t22) \right) / (1+s (1 + (-1+m) t12 - m t22) + m t22 \alpha + t12 (\alpha - m \alpha)) + \\
& \left( r (dd1(-1+m) - dd2m + p12 - m p12 + m p22 - p12 t12 + m p12 t12 - m p22 t22) \right. \\
& \quad \left. (dd1(-1+m) - dd2m + t12 - m t12 - p12 t12 + m p12 t12 + m t22 - m p22 t22) \right. \\
& \quad \left. (1+\alpha) \right) / (1+s (1 + (-1+m) t12 - m t22) + m t22 \alpha + t12 (\alpha - m \alpha)) \Big) \\
& \left( (dd1(-1+m) - dd2m - p12 t12 + m p12 t12 - m p22 t22) (dd1(-1+m) - \right. \\
& \quad \left. dd2m + p12 - m p12 + m p22 - p12 t12 + m p12 t12 - m p22 t22) (1+\alpha) \right) / \\
& \left( -1 + s (-1 + t12 - m t12 + m t22) + (-1+m) t12 \alpha - m t22 \alpha \right) + \\
& \left( (dd1(-1+m) - dd2m - p12 t12 + m p12 t12 - m p22 t22) (dd1(-1+m) - \right. \\
& \quad \left. dd2m + t12 - m t12 - p12 t12 + m p12 t12 + m t22 - m p22 t22) (1+\alpha) \right) / \\
& \left( -1 + s (-1 + t12 - m t12 + m t22) + (-1+m) t12 \alpha - m t22 \alpha \right) - \\
& \left( (dd1(-1+m) - dd2m - p12 t12 + m p12 t12 - m p22 t22) \right. \\
& \quad \left. (dd1(-1+m) - dd2m + t12 - m t12 - p12 t12 + m p12 t12 + m t22 - m p22 t22) \right) / \\
& \left( 1 + (1 + (-1+m) t12 - m t22) \alpha + s (1 + (-1+m) t12 - m t22) (1+\alpha) \right) - \\
& \left( (-1+r) (dd1(-1+m) - dd2m - p12 t12 + m p12 t12 - m p22 t22) \right. \\
& \quad \left. (-1 + dd1(-1+m) - dd2m + p12 - m p12 + m p22 + t12 - \right. \\
& \quad \left. m t12 - p12 t12 + m p12 t12 + m t22 - m p22 t22) \right) / \\
& \left( 1 + (1 + (-1+m) t12 - m t22) \alpha + s (1 + (-1+m) t12 - m t22) (1+\alpha) \right) + \\
& \left( r (1+s) (dd1(-1+m) - dd2m + p12 - m p12 + m p22 - p12 t12 + m p12 t12 - m p22 t22) \right. \\
& \quad \left. (dd1(-1+m) - dd2m + t12 - m t12 - p12 t12 + m p12 t12 + m t22 - m p22 t22) \right. \\
& \quad \left. (1+\alpha) \right) / (1 + (1 + (-1+m) t12 - m t22) \alpha + s (1 + (-1+m) t12 - m t22) (1+\alpha)) - \\
& \left( (1+s) (dd1(-1+m) - dd2m - p12 t12 + m p12 t12 - m p22 t22) \right. \\
& \quad \left. (dd1(-1+m) - dd2m + p12 - m p12 + m p22 - p12 t12 + m p12 t12 - m p22 t22) \right) / \\
& \left( 1 + s (1 + (-1+m) t12 - m t22) + m t22 \alpha + t12 (\alpha - m \alpha) \right) - \\
& \left( (-1+r) (1+s) (dd1(-1+m) - dd2m - p12 t12 + m p12 t12 - m p22 t22) \right. \\
& \quad \left. (-1 + dd1(-1+m) - dd2m + p12 - m p12 + m p22 + t12 - m t12 - p12 t12 + m p12 t12 + \right. \\
& \quad \left. m t22 - m p22 t22) \right) / (1+s (1 + (-1+m) t12 - m t22) + m t22 \alpha + t12 (\alpha - m \alpha)) + \\
& \left( r (dd1(-1+m) - dd2m + p12 - m p12 + m p22 - p12 t12 + m p12 t12 - m p22 t22) \right. \\
& \quad \left. (dd1(-1+m) - dd2m + t12 - m t12 - p12 t12 + m p12 t12 + m t22 - m p22 t22) \right. \\
& \quad \left. (1+\alpha) \right) / (1+s (1 + (-1+m) t12 - m t22) + m t22 \alpha + t12 (\alpha - m \alpha)) + \\
& \left( 2 (dd1 - dd1m + dd2m + p12 t12 - m p12 t12 + m p22 t22)^2 (1+\alpha) \right) / \\
& \left( 1 + s (1 + (-1+m) t12 - m t22) + m t22 \alpha + t12 (\alpha - m \alpha) \right) \Big), \\
& \left( dd2 (s - \alpha) (1 + t22 \alpha + s t22 (1+\alpha)) - m^3 (p12 - p22) (t12 - t22) \right. \\
& \quad \left. (-s^2 (t12 - t22) (1+\alpha) + \alpha ((t12 - t22) \alpha + p12 (2+\alpha) - p22 (2+\alpha)) + \right.
\end{aligned}$$

$$\begin{aligned}
& s \alpha \left( (t_{12} - t_{22}) \alpha + p_{12} (2 + \alpha) - p_{22} (2 + \alpha) \right) + \\
& p_{22} (2 + 2 (1 + dd_2) \alpha + (dd_2 - 2 (-1 + t_{22}) t_{22}) \alpha^2 + 2 s^2 t_{22}^2 (1 + \alpha) + \\
& s (-2 t_{22}^2 \alpha^2 + dd_2 \alpha (2 + \alpha) + 2 t_{22} (2 + 2 \alpha + \alpha^2))) + \\
& m^2 (p_{12}^2 (1 + s) (t_{12} - t_{22}) \alpha (2 + \alpha) + 2 p_{22}^2 (1 + s) (t_{12} - t_{22}) \alpha (2 + \alpha) + \\
& (dd_1 - dd_2) (t_{12} - t_{22}) (s - \alpha) (s + \alpha + s \alpha) + \\
& p_{22} (s^2 (t_{12}^2 - 5 t_{12} t_{22} + 4 t_{22}^2) (1 + \alpha) - \alpha (dd_1 (2 + \alpha) - dd_2 (2 + \alpha) + \\
& (t_{12} - t_{22}) (1 + (2 + t_{12} - 4 t_{22}) \alpha)) - s (t_{12}^2 \alpha^2 + 4 t_{22}^2 \alpha^2 + \\
& (dd_1 - dd_2) \alpha (2 + \alpha) - t_{22} (3 + 4 \alpha + 2 \alpha^2) + t_{12} (3 + 4 \alpha + (2 - 5 t_{22}) \alpha^2))) + \\
& p_{12} (s^2 (t_{12}^2 + t_{12} t_{22} - 2 t_{22}^2) (1 + \alpha) - s (t_{12}^2 \alpha^2 - 2 t_{22}^2 \alpha^2 - \\
& (dd_1 - dd_2) \alpha (2 + \alpha) + t_{22} (3 + (4 - 6 p_{22}) \alpha + (2 - 3 p_{22}) \alpha^2) + \\
& t_{12} (-3 + (-4 + 6 p_{22}) \alpha + (-2 + 3 p_{22} + t_{22}) \alpha^2)) - \alpha (-dd_1 (2 + \alpha) + \\
& dd_2 (2 + \alpha) + (t_{12} - t_{22}) (-1 + (-2 + t_{12} + 2 t_{22}) \alpha + 3 p_{22} (2 + \alpha)))) + \\
& m (-p_{22}^2 (1 + s) (t_{12} - t_{22}) \alpha (2 + \alpha) + (s - \alpha) (dd_2 (-1 + t_{12} \alpha - 2 t_{22} \alpha + \\
& s (t_{12} - 2 t_{22}) (1 + \alpha)) + dd_1 (1 + t_{22} \alpha + s t_{22} (1 + \alpha))) + \\
& p_{22} (-2 + (-2 + 2 dd_1 - 4 dd_2 + t_{12} - t_{22}) \alpha + (dd_1 - 2 dd_2 + 2 t_{12} - 4 t_{22} - \\
& 3 t_{12} t_{22} + 5 t_{22}^2) \alpha^2 + s^2 (3 t_{12} - 5 t_{22}) t_{22} (1 + \alpha) + s (5 t_{22}^2 \alpha^2 + \\
& (dd_1 - 2 dd_2) \alpha (2 + \alpha) - t_{22} (7 + 8 \alpha + 4 \alpha^2) + t_{12} (3 + 4 \alpha + (2 - 3 t_{22}) \alpha^2))) + \\
& p_{12} (2 + (2 + 2 dd_2 + (-1 + 2 p_{22}) t_{12} + t_{22} - 2 p_{22} t_{22}) \alpha + \\
& (dd_2 + p_{22} (t_{12} - t_{22}) - t_{22} (-2 + t_{12} + t_{22})) \alpha^2 + \\
& s^2 t_{22} (t_{12} + t_{22}) (1 + \alpha) + s (-t_{22}^2 \alpha^2 + dd_2 \alpha (2 + \alpha) + \\
& t_{22} (3 - 2 (-2 + p_{22}) \alpha - (-2 + p_{22}) \alpha^2) + t_{12} (1 - t_{22} \alpha^2 + p_{22} \alpha (2 + \alpha)))))) / \\
& (2 (1 + s t_{22} + m (t_{12} - t_{22}) (s - \alpha) + \alpha - t_{22} \alpha) (1 + t_{22} \alpha + s t_{22} (1 + \alpha) + \\
& m (t_{12} - t_{22}) (s + \alpha + s \alpha))), \\
& \left( (m (t_{12} - t_{22}) + t_{22}) (2 + (1 + 2 p_{22} - 2 m^2 (p_{12} - p_{22}) (t_{12} - t_{22}) + \right. \\
& m (t_{12} - 2 p_{22} (1 + t_{12} - 2 t_{22}) - 2 p_{12} (-1 + t_{22}) - t_{22}) + t_{22} - 2 p_{22} t_{22}) \alpha - \\
& (-1 + m (t_{12} - t_{22}) + t_{22}) (p_{22} + m (p_{12} - p_{22} + t_{12} - t_{22}) + t_{22}) \alpha^2 + \\
& s^2 (m^2 (t_{12} - t_{22})^2 + t_{22} (1 + t_{22}) + m (t_{12} - t_{22}) (1 + 2 t_{22})) (1 + \alpha) - \\
& s (-1 - 3 t_{22} - 2 p_{22} \alpha - 4 t_{22} \alpha + 2 p_{22} t_{22} \alpha - p_{22} \alpha^2 - t_{22} \alpha^2 + p_{22} t_{22} \alpha^2 + \\
& t_{22}^2 \alpha^2 + m^2 (t_{12} - t_{22}) \alpha ((t_{12} - t_{22}) \alpha + p_{12} (2 + \alpha) - p_{22} (2 + \alpha)) + \\
& m (-2 t_{22}^2 \alpha^2 - (p_{12} - p_{22}) \alpha (2 + \alpha) + t_{22} (3 + 2 (2 + p_{12} - 2 p_{22}) \alpha + (1 + p_{12} - \\
& 2 p_{22}) \alpha^2) + t_{12} (-3 + 2 (-2 + p_{22}) \alpha + (-1 + p_{22} + 2 t_{22}) \alpha^2))) \left. \right) / \\
& (2 (1 + s t_{22} + m (t_{12} - t_{22}) (s - \alpha) + \alpha - t_{22} \alpha) (1 + t_{22} \alpha + s t_{22} (1 + \alpha) + \\
& m (t_{12} - t_{22}) (s + \alpha + s \alpha))), \\
& \frac{1}{4} \left( - \left( (r (1 + s) (dd_2 + dd_1 m - dd_2 m + m p_{12} t_{12} + p_{22} t_{22} - m p_{22} t_{22}) \right. \right. \\
& (1 + dd_2 + dd_1 m - dd_2 m - m p_{12} - p_{22} + m p_{22} - m t_{12} + m p_{12} t_{12} - t_{22} + m t_{22} + \\
& p_{22} t_{22} - m p_{22} t_{22})) / (1 + s t_{22} + m (t_{12} - t_{22}) (s - \alpha) + \alpha - t_{22} \alpha) - \\
& ((-1 + r) (dd_2 (-1 + m) - dd_1 m + m p_{12} + p_{22} - m p_{22} - m p_{12} t_{12} - p_{22} t_{22} + m p_{22} t_{22}) \\
& (dd_2 (-1 + m) - dd_1 m + m t_{12} - m p_{12} t_{12} + t_{22} - m t_{22} - p_{22} t_{22} + m p_{22} t_{22}) \\
& (1 + \alpha)) / (1 + s t_{22} + m (t_{12} - t_{22}) (s - \alpha) + \alpha - t_{22} \alpha) - \\
& ((dd_2 (-1 + m) - dd_1 m + m p_{12} + p_{22} - m p_{22} - m p_{12} t_{12} - p_{22} t_{22} + m p_{22} t_{22}) \\
& (-1 + dd_2 (-1 + m) - dd_1 m + m p_{12} + p_{22} - m p_{22} + m t_{12} - m p_{12} t_{12} + t_{22} - m t_{22} - \\
& p_{22} t_{22} + m p_{22} t_{22}) (1 + \alpha)) / (1 + s t_{22} + m (t_{12} - t_{22}) (s - \alpha) + \alpha - t_{22} \alpha) + \\
& \left( 2 (dd_2 + dd_1 m - dd_2 m - m p_{12} - p_{22} + m p_{22} + m p_{12} t_{12} + p_{22} t_{22} - m p_{22} t_{22})^2 \right) / \\
& (1 + t_{22} \alpha + s t_{22} (1 + \alpha) + m (t_{12} - t_{22}) (s + \alpha + s \alpha)) - \\
& ((dd_2 (-1 + m) - dd_1 m - m p_{12} t_{12} - p_{22} t_{22} + m p_{22} t_{22}) \\
& (dd_2 (-1 + m) - dd_1 m + m p_{12} + p_{22} - m p_{22} - m p_{12} t_{12} - p_{22} t_{22} + m p_{22} t_{22})) / \\
& (1 + t_{22} \alpha + s t_{22} (1 + \alpha) + m (t_{12} - t_{22}) (s + \alpha + s \alpha)) + \\
& (r (dd_2 (-1 + m) - dd_1 m - m p_{12} t_{12} - p_{22} t_{22} + m p_{22} t_{22}) (-1 + dd_2 (-1 + m) - dd_1 m +
\end{aligned}$$





$$\begin{aligned} & \left( (dd2(-1+m) - dd1m + m p12 t12 - p22 t22 + m p22 t22) \right. \\ & \quad \left. (-1 + dd2(-1+m) - dd1m + m p12 + p22 - m p22 + m t12 - m p12 t12 + t22 - m t22 - \right. \\ & \quad \left. p22 t22 + m p22 t22) (1+\alpha) \right) / (1 + s t22 + m (t12 - t22) (s - \alpha) + \alpha - t22 \alpha) + \\ & \left( 2(-1 + dd2(-1+m) - dd1m + m p12 + p22 - m p22 + m t12 - m p12 t12 + t22 - m t22 - p22 \right. \\ & \quad \left. t22 + m p22 t22)^2 (1+\alpha) \right) / (1 + s t22 + m (t12 - t22) (s - \alpha) + \alpha - t22 \alpha) - \\ & \left( (-1 + r) (dd2(-1+m) - dd1m - m p12 t12 - p22 t22 + m p22 t22) \right. \\ & \quad \left. (-1 + dd2(-1+m) - dd1m + m p12 + p22 - m p22 + m t12 - m p12 t12 + t22 - m t22 - \right. \\ & \quad \left. p22 t22 + m p22 t22) \right) / (1 + t22 \alpha + s t22 (1+\alpha) + m (t12 - t22) (s + \alpha + s \alpha)) - \\ & \left( (dd2(-1+m) - dd1m + m p12 + p22 - m p22 - m p12 t12 - p22 t22 + m p22 t22) \right. \\ & \quad \left. (-1 + dd2(-1+m) - dd1m + m p12 + p22 - m p22 + m t12 - m p12 t12 + t22 - m t22 - \right. \\ & \quad \left. p22 t22 + m p22 t22) \right) / (1 + t22 \alpha + s t22 (1+\alpha) + m (t12 - t22) (s + \alpha + s \alpha)) + \\ & (r (1+s) (dd2 + dd1m - dd2m - m p12 - p22 + m p22 + m p12 t12 + p22 t22 - m p22 t22) \\ & \quad (dd2 + dd1m - dd2m - m t12 + m p12 t12 - t22 + m t22 + p22 t22 - m p22 t22) (1+\alpha)) / \\ & \quad (1 + t22 \alpha + s t22 (1+\alpha) + m (t12 - t22) (s + \alpha + s \alpha)) \Big) \\ & \left( -((1+s) (dd2 + dd1m - dd2m + m p12 t12 + p22 t22 - m p22 t22) \right. \\ & \quad \left. (dd2 + dd1m - dd2m - m t12 + m p12 t12 - t22 + m t22 + p22 t22 - m p22 t22)) / \right. \\ & \quad \left. (1 + s t22 + m (t12 - t22) (s - \alpha) + \alpha - t22 \alpha) - \right. \\ & \left( (-1+r) (1+s) (dd2 + dd1m - dd2m + m p12 t12 + p22 t22 - m p22 t22) \right. \\ & \quad \left. (1 + dd2 + dd1m - dd2m - m p12 - p22 + m p22 - m t12 + m p12 t12 - t22 + m t22 + \right. \\ & \quad \left. p22 t22 - m p22 t22) \right) / (1 + s t22 + m (t12 - t22) (s - \alpha) + \alpha - t22 \alpha) + \\ & (r (dd2(-1+m) - dd1m + m p12 + p22 - m p22 - m p12 t12 - p22 t22 + m p22 t22) \\ & \quad (dd2(-1+m) - dd1m + m t12 - m p12 t12 + t22 - m t22 - p22 t22 + m p22 t22) \\ & \quad (1+\alpha)) / (1 + s t22 + m (t12 - t22) (s - \alpha) + \alpha - t22 \alpha) - \\ & \left( (dd2(-1+m) - dd1m - m p12 t12 - p22 t22 + m p22 t22) \right. \\ & \quad \left. (dd2(-1+m) - dd1m + m p12 + p22 - m p22 - m p12 t12 - p22 t22 + m p22 t22) \right) / \\ & \quad (1 + t22 \alpha + s t22 (1+\alpha) + m (t12 - t22) (s + \alpha + s \alpha)) - \\ & \left( (-1+r) (dd2(-1+m) - dd1m - m p12 t12 - p22 t22 + m p22 t22) \right. \\ & \quad \left. (-1 + dd2(-1+m) - dd1m + m p12 + p22 - m p22 + m t12 - m p12 t12 + t22 - m t22 - \right. \\ & \quad \left. p22 t22 + m p22 t22) \right) / (1 + t22 \alpha + s t22 (1+\alpha) + m (t12 - t22) (s + \alpha + s \alpha)) + \\ & \left( 2(1+s) (dd2 + dd1m - dd2m + m p12 t12 + p22 t22 - m p22 t22)^2 (1+\alpha) \right) / \\ & \quad (1 + t22 \alpha + s t22 (1+\alpha) + m (t12 - t22) (s + \alpha + s \alpha)) - \\ & \left( (1+s) (dd2 + dd1m - dd2m + m p12 t12 + p22 t22 - m p22 t22) \right. \\ & \quad \left. (dd2 + dd1m - dd2m - m p12 - p22 + m p22 + m p12 t12 + p22 t22 - m p22 t22) (1+\alpha) \right) / \\ & \quad (1 + t22 \alpha + s t22 (1+\alpha) + m (t12 - t22) (s + \alpha + s \alpha)) - \\ & \left( (1+s) (dd2 + dd1m - dd2m + m p12 t12 + p22 t22 - m p22 t22) \right. \\ & \quad \left. (dd2 + dd1m - dd2m - m t12 + m p12 t12 - t22 + m t22 + p22 t22 - m p22 t22) (1+\alpha) \right) / \\ & \quad (1 + t22 \alpha + s t22 (1+\alpha) + m (t12 - t22) (s + \alpha + s \alpha)) + \\ & (r (1+s) (dd2 + dd1m - dd2m - m p12 - p22 + m p22 + m p12 t12 + p22 t22 - m p22 t22) \\ & \quad (dd2 + dd1m - dd2m - m t12 + m p12 t12 - t22 + m t22 + p22 t22 - m p22 t22) (1+\alpha)) / \\ & \quad (1 + t22 \alpha + s t22 (1+\alpha) + m (t12 - t22) (s + \alpha + s \alpha)) \Big) \} \end{aligned}$$

```
mdatsymfix1[p20_, t20_, dd0_, s_,  $\alpha$ _, m_, r_, tend_] :=
  mdatsymfix1[p20, t20, dd0, s,  $\alpha$ , m, r, tend] = PadRight[NestWhileList[
    itfastsym[s,  $\alpha$ , m, r], {0, 0, 0, p2, t2, dd} /. {p2  $\rightarrow$  p20, t2  $\rightarrow$  t20, dd  $\rightarrow$  dd0},
    Chop[#[[5]]] > 10^(-14) &, 1, tend], tend + 1, {{0, 0, 0, 0, 0, 0}}]
```

```
initvalD0 = {{0.99, 0.99, 0}, {0.95, 0.95, 0},
             {0.9, 0.9, 0}, {0.8, 0.8, 0}, {0.7, 0.7, 0}, {0.6, 0.6, 0}};
```

```
mtabdatfixD0[ss_,  $\alpha$ _, mm_, r_, tend_] [nvals_] := Table[
  {n, Transpose[Table[mdatsymfix1[initvalD0[[i, 1]], initvalD0[[i, 2]], initvalD0[[i,
    3]], ss,  $\alpha$ , mm, r, tend] [[n, 4 ;; 6]] // Chop, {i, 1, 6}]]], {n, nvals}]
```

```
initphm = {{0.99, 0.99, 0.99 * 0.01}, {0.95, 0.95, 0.05 * 0.95}, {0.9, 0.9, 0.1 * 0.9},
           {0.8, 0.8, 0.2 * 0.8}, {0.7, 0.7, 0.3 * 0.7}, {0.6, 0.6, 0.4 * 0.6}};
```

```
mtabdatphmfix1[ss_,  $\alpha$ _, mm_, r_, tend_] [nvals_] :=
  Table[{n, Transpose[Table[mdatsymfix1[initphm[[i, 1]], initphm[[i, 2]],
    initphm[[i, 3]], ss,  $\alpha$ , mm, r, tend] [[n]] // Chop, {i, 1, 6}]]], {n, nvals}]
```

```
initKPF = {{0.8695, 0.99, 0.0048}, {0.8279, 0.95, 0.0241}, {0.7766, 0.9, 0.0471},
           {0.6768, 0.8, 0.0471}, {0.5814, 0.7, 0.1123}, {0.4909, 0.6, 0.1261}};
```

```
mtabdatKPF[ss_,  $\alpha$ _, mm_, r_, tend_] [nvals_] :=
  Table[{n, Transpose[Table[mdatsymfix1[initKPF[[i, 1]], initKPF[[i, 2]],
    initKPF[[i, 3]], ss,  $\alpha$ , mm, r, tend] [[n]] // Chop, {i, 1, 6}]]], {n, nvals}]
```

### 3.2.2 Example : Figure 5B ( $r = 0.1$ , phenotype matching initial conditions)

```
mtabdatphmfix1[0.2, 10, 0.01, 0.1, 1000] [{1, 10, 100, 1000}] // TableForm //
AbsoluteTiming
```

|           |           |           |           |           |            |            |
|-----------|-----------|-----------|-----------|-----------|------------|------------|
|           | 0         | 0         | 0         | 0         | 0          | 0          |
|           | 0         | 0         | 0         | 0         | 0          | 0          |
| 1         | 0         | 0         | 0         | 0         | 0          | 0          |
|           | 0.99      | 0.95      | 0.9       | 0.8       | 0.7        | 0.6        |
|           | 0.99      | 0.95      | 0.9       | 0.8       | 0.7        | 0.6        |
|           | 0.0099    | 0.0475    | 0.09      | 0.16      | 0.21       | 0.24       |
|           | 0.0224873 | 0.0221912 | 0.0216375 | 0.019817  | 0.0172123  | 0.014219   |
|           | 0.0172485 | 0.0170147 | 0.0165398 | 0.0149046 | 0.0125822  | 0.00998798 |
| 10        | 0.0140545 | 0.013815  | 0.0133707 | 0.011944  | 0.00998956 | 0.00784198 |
|           | 0.975931  | 0.968589  | 0.954967  | 0.900276  | 0.799773   | 0.664923   |
|           | 0.982095  | 0.978239  | 0.968191  | 0.915964  | 0.812708   | 0.673315   |
|           | 0.0145323 | 0.0172381 | 0.0244119 | 0.0619359 | 0.127307   | 0.188458   |
| {7.87213, | 0.247323  | 0.237737  | 0.224909  | 0.197605  | 0.171399   | 0.139585   |
|           | 0.18307   | 0.172009  | 0.157122  | 0.125222  | 0.0946422  | 0.0592968  |
| 100       | 0.0894122 | 0.0844256 | 0.0775409 | 0.0622144 | 0.0469798  | 0.0293562  |
|           | 0.744343  | 0.718285  | 0.681459  | 0.595573  | 0.503704   | 0.398806   |
|           | 0.807472  | 0.777674  | 0.734793  | 0.632906  | 0.522758   | 0.396772   |
|           | 0.0930016 | 0.102899  | 0.115244  | 0.135624  | 0.14348    | 0.134928   |
|           | 0.469672  | 0.452363  | 0.429076  | 0.377963  | 0.325665   | 0.263973   |
|           | 0.445757  | 0.424917  | 0.396882  | 0.335359  | 0.27244    | 0.198303   |
| 1000      | 0.131297  | 0.129623  | 0.126567  | 0.116683  | 0.102201   | 0.0798341  |
|           | 0.522044  | 0.504688  | 0.481238  | 0.429347  | 0.375613   | 0.311244   |
|           | 0.544268  | 0.52337   | 0.495132  | 0.432642  | 0.367925   | 0.290385   |
|           | 0.131917  | 0.132834  | 0.133248  | 0.130788  | 0.123352   | 0.108018   |

```

mtabdatphmfix1[0.2, 10, 0.01, 0.1, 100000] [
  {1, 10, 100, 1000, 10000, 20000, 50000, 80000, 100000}] // TableForm

1
0 0 0 0 0 0
0 0 0 0 0 0
0 0 0 0 0 0
0.99 0.95 0.9 0.8 0.7 0.6
0.99 0.95 0.9 0.8 0.7 0.6
0.0099 0.0475 0.09 0.16 0.21 0.24

10
0.0224873 0.0221912 0.0216375 0.019817 0.0172123 0.014219
0.0172485 0.0170147 0.0165398 0.0149046 0.0125822 0.00998798
0.0140545 0.013815 0.0133707 0.011944 0.00998956 0.00784198
0.975931 0.968589 0.954967 0.900276 0.799773 0.664923
0.982095 0.978239 0.968191 0.915964 0.812708 0.673315
0.0145323 0.0172381 0.0244119 0.0619359 0.127307 0.188458

100
0.247323 0.237737 0.224909 0.197605 0.171399 0.139585
0.18307 0.172009 0.157122 0.125222 0.0946422 0.0592968
0.0894122 0.0844256 0.0775409 0.0622144 0.0469798 0.0293562
0.744343 0.718285 0.681459 0.595573 0.503704 0.398806
0.807472 0.777674 0.734793 0.632906 0.522758 0.396772
0.0930016 0.102899 0.115244 0.135624 0.14348 0.134928

1000
0.469672 0.452363 0.429076 0.377963 0.325665 0.263973
0.445757 0.424917 0.396882 0.335359 0.27244 0.198303
0.131297 0.129623 0.126567 0.116683 0.102201 0.0798341
0.522044 0.504688 0.481238 0.429347 0.375613 0.311244
0.544268 0.52337 0.495132 0.432642 0.367925 0.290385
0.131917 0.132834 0.133248 0.130788 0.123352 0.108018

10000
0.4725 0.467005 0.459595 0.443215 0.426191 0.405532
0.449162 0.442547 0.433625 0.413904 0.393409 0.36854
0.131521 0.131072 0.130384 0.128532 0.126125 0.122552
0.524873 0.519374 0.511948 0.49549 0.478324 0.457408
0.547675 0.541054 0.532112 0.512294 0.491624 0.466436
0.131718 0.132091 0.132513 0.133109 0.133233 0.132696

20000
0.473447 0.471913 0.469843 0.465261 0.460488 0.454675
0.450302 0.448455 0.445963 0.440447 0.4347 0.427701
0.131594 0.131476 0.131311 0.130919 0.130472 0.129876
0.52582 0.524286 0.522215 0.517627 0.512843 0.50701
0.548815 0.546968 0.544474 0.53895 0.533189 0.526166
0.131649 0.13176 0.131905 0.132199 0.132467 0.132741

50000
0.473805 0.473772 0.473727 0.473627 0.473523 0.473397
0.450734 0.450694 0.45064 0.45052 0.450395 0.450242
0.131621 0.131618 0.131615 0.131607 0.131599 0.13159
0.526179 0.526146 0.526101 0.526001 0.525897 0.52577
0.549247 0.549207 0.549152 0.549032 0.548907 0.548755
0.131622 0.131624 0.131628 0.131635 0.131643 0.131652

80000
0.473813 0.473812 0.473811 0.473809 0.473807 0.473804
0.450743 0.450743 0.450741 0.450739 0.450736 0.450733
0.131621 0.131621 0.131621 0.131621 0.131621 0.131621
0.526187 0.526186 0.526185 0.526183 0.526181 0.526178
0.549256 0.549255 0.549254 0.549252 0.549249 0.549245
0.131621 0.131621 0.131621 0.131622 0.131622 0.131622

100000
0.473813 0.473813 0.473813 0.473813 0.473813 0.473812
0.450744 0.450744 0.450743 0.450743 0.450743 0.450743
0.131621 0.131621 0.131621 0.131621 0.131621 0.131621
0.526187 0.526187 0.526187 0.526187 0.526186 0.526186
0.549256 0.549256 0.549256 0.549256 0.549256 0.549256
0.131621 0.131621 0.131621 0.131621 0.131621 0.131621

params[αα_] := {s1 → 0.2, s2 → 0.2, m1 → 0.01, m2 → 0.01, α1 → αα, α2 → αα};
Table[t12t22 = FindRoot[{factdelta3maler1 /. p12p22genmt12 /. dd12genmt12 /. params[αα],
  factdelta6maler1 /. p12p22genmt12 /. dd12genmt12 /. params[αα]} == 0,
  {{t12, 0.45}, {t22, 0.56}}]; Flatten[
  Select[{p12, t12, dd1, p22, t22, dd2} /. p12p22genmt12 /. dd12genmt12 /. t12t22 /.
    params[αα], 0 < #[[1]] < 1 && 0 < #[[2]] < 1 &&
      -Min[(1 - #[[1]]) (1 - #[[2]]), #[[1]] #[[2]]] ≤ #[[3]] ≤ Min[#[[1]] (1 - #[[2]]),
        #[[2]] (1 - #[[1]])] && 0 < #[[4]] < 1 && 0 < #[[5]] < 1 &], 1], {αα, 10, 10}]
  {{0.473813, 0.450744, 0.131621, 0.526187, 0.549256, 0.131621}}

```

```

mplotcor2br01endp =
  ListPointPlot3D[Table[ddat = mdatsymfix1[initphm[[i, 1]], initphm[[i, 2]],
    initphm[[i, 3]], 0.2, 10, 0.01, 0.1, 100000][[100000, 4 ;; 6]];
    {{ddat[[1]], ddat[[2]], ddat[[3]] / (Sqrt[ddat[[1]] (1 - ddat[[1]]) ddat[[2]] (1 -
      ddat[[2]])}}}, {i, 1, 6}], PlotStyle -> {Directive[Red, PointSize[0.035]],
    Directive[Darker[Green], PointSize[0.035]], Directive[Magenta, PointSize[0.035]],
    Directive[Orange, PointSize[0.035]], Directive[Green, PointSize[0.035]],
    Directive[Blue, PointSize[0.035]]}, AxesLabel -> {p2, t2, D}];
mplotcor2br01all = ListPointPlot3D[Table[Table[ddat = mdatsymfix1[initphm[[i, 1]],
    initphm[[i, 2]], initphm[[i, 3]], 0.2, 10, 0.01, 0.1, 100000][[n, 4 ;; 6]];
    {ddat[[1]], ddat[[2]], ddat[[3]] /
      (Sqrt[ddat[[1]] (1 - ddat[[1]]) ddat[[2]] (1 - ddat[[2]])}}},
    {n, Flatten[{Join[Table[j, {j, 1, 1000}], Table[1000 + 10 j, {j, 1, 4900}]]}],
    {i, 1, 6}], PlotStyle -> {Red, Darker[Green], Magenta, Orange, Green, Blue}];
mplotcor2br01 = Show[mplotcor2br01all, mplotcor2br01endp,
  ImageSize -> 450, PlotRange -> {{0, 1}, {0, 1}, {-0.005, 1.005}},
  AxesLabel -> {Text[Style[p22, Black, 15]],
    Text[Style[t22, Black, 15]], Text[Style[D2,cor, Black, 15]]},
  LabelStyle -> Directive[Black, FontFamily -> "Helvetica", 12], BoxRatios -> {1, 1, 0.6},
  ViewPoint -> {3.4, -2.4, 1.6}, AxesEdge -> {{0, 0}, {1, 0}, {1, 1}},
  Ticks -> {{0, 0.5, 1}, {{0, " 0"}, 0.5, 1}, {0, 0.5, 1}}]

```

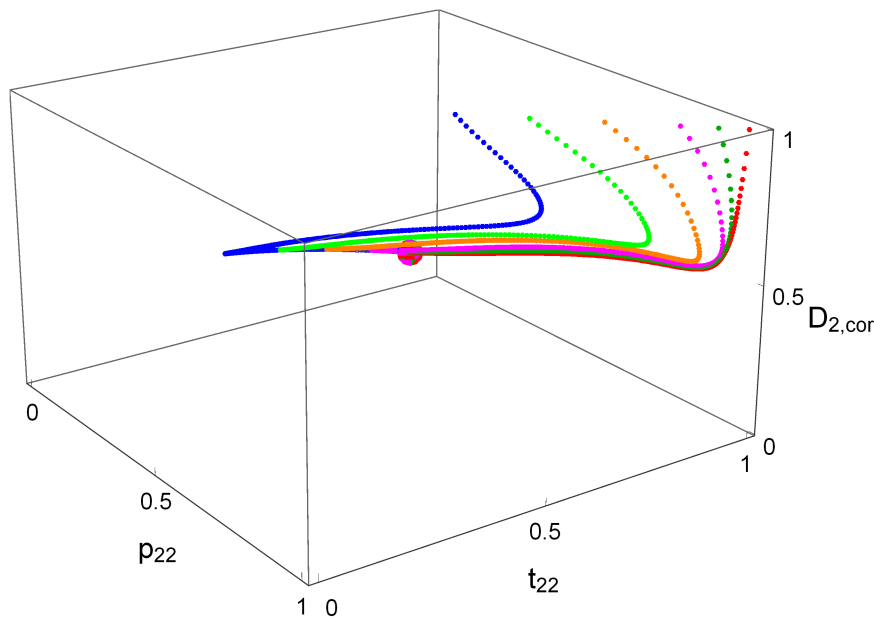

Supplement: s1 [file s1]
