# Supplementary material for: The Effects on Parapatric Divergence of Linkage between Preference and Trait Loci versus Pleiotropy
Source: MDPI journal article supplement (doi:10.3390/genes9040217), 2018-04-17
Supplement: s1 [file s1]

# THE EFFECTS ON PARAPATRIC DIVERGENCE OF LINKAGE BETWEEN PREFERENCE AND TRAIT LOCI VERSUS PLEIOTROPY

Maria R. Servedio and Reinhard Bürger

## Supplementary Materials File S5 – Asymmetric preferences

In order to understand the counterintuitive observation of the loss of allele  $T_2$  with strong preferences when  $\alpha_2 > \alpha_1$ , we tracked genotype frequencies through the life cycle for selected generations when  $\alpha_2 > 1.1 \alpha_1$  and  $\alpha_1 = 500$ . We examined both cases in which the loci within each population started in linkage equilibrium and cases which started with high linkage disequilibrium, with selection occurring in both sexes. We discovered the loss of  $T_2$  to be due to two primary factors. First, changes in allele frequency at the trait locus due to viability selection are unequal in the two populations even when the selection coefficients are symmetrical. Specifically, local adaptation results in larger changes in allele frequency in the population with more genetic variation; this can cause viability selection to lead to a global (across both populations) reduction in frequency of the globally more common allele. Second, the homogenization of preference frequencies across the populations can cause sexual selection to favor rare trait alleles in each population (see Servedio and Bürger 2014). We observed these two factors to lead to the loss of  $T_2$  through the following sequence of steps:

- 1) When  $\alpha_2 > \alpha_1$ ,  $t_2$  initially increases globally, due to the stronger global preference for  $T_2$  than for  $T_1$  ( $p_2$  also increases, due to the quickly-established LD between the P and T loci). Therefore, right before viability selection in the life cycle,  $t_2$  (and  $p_2$ ) are higher in population 2 than  $t_1$  (and  $p_1$ ) are in population 1. Given the same selection coefficient for local adaptation,  $s$ , in both populations, this lower genetic variation in population 2 than population 1 leads to less of an increase of  $t_2$  (and  $p_2$ ) in population 2 than of  $t_1$  (and  $p_1$ ) in population 1. Consequently, summed across both populations,  $t_2$  (and  $p_2$ ) decrease in the viability selection step of the life cycle in these early generations.
- 2) In contrast, the frequency of  $t_2$  (and  $p_2$ ) increases globally in the sexual selection step of the life cycle in the generations shortly after secondary contact. This occurs because the global frequencies of the preferences,  $p_1$  and  $p_2$ , are similar to one another given the starting conditions that we used, and  $\alpha_2 > \alpha_1$ . More specifically, sexual selection causes  $t_2$  to decrease in population 2 and increase in population 1 (because the preferences quickly become more homogenized between populations than the trait frequencies, see Servedio and Bürger, 2014), but the increase of  $t_2$  in population 1 is bigger than its decrease in population 2 because of the high  $\alpha_2$ . In early generations after contact the increase of  $t_2$  (and  $p_2$ ) from sexual selection overwhelms the decrease in  $t_2$  (and  $p_2$ ) from viability selection, and  $t_2$  (and  $p_2$ ) globally increase overall.

- 3) Over the course of generations, the global overall increase of  $t_2$  (and  $p_2$ ) across the life cycle becomes smaller and smaller. At some point the viability selection decrease in  $t_2$  (and  $p_2$ ) overwhelms the sexual selection increase in these frequencies and  $t_2$  (and  $p_2$ ) start to decrease across the life cycle. It was observed that the global decrease in  $p_2$  occurs at least a generation or so before the global decrease in  $t_2$  occurs. The frequency  $p_2$  was also observed to have a greater global decrease at the viability selection step of the life cycle than does  $t_2$ . This may initially seem surprising, since viability selection acts directly on the T locus and frequencies at the P locus change only due to indirect selection. The greater global decrease in  $p_2$  than  $t_2$  at the viability selection step occurs, however, because LD between the P and T loci is higher in population 1 (where there is higher variation) than in population 2. The decrease in  $t_2$  (and  $p_2$ ) in population 1 due to viability selection, which drives the global decrease in  $t_2$  and  $p_2$ , thus leads to a disproportionately larger decrease in  $p_2$  in the population in which the change (decrease) in  $t_2$  is already greater.
- 4) In later generations, the effects of viability and sexual selection on  $t_2$  (and  $p_2$ ) are reversed from what they are in early generations after contact. Once the global values of  $t_2$  and  $p_2$  decrease sufficiently, there becomes more genetic variation in population 2 than in population 1 (due to the overall lower frequency of  $t_2$  and  $p_2$  than of  $t_1$  and  $p_1$  – the opposite of the pattern in the early generations after contact). Viability selection thus becomes more effective at increasing  $t_2$  (and  $p_2$ ) in population 2 than at increasing  $t_1$  (and  $p_1$ ) in population 1; the frequencies  $t_2$  and  $p_2$  thus increase globally at the viability selection stage of the life cycle. However, when  $p_1$  is sufficiently more frequent than  $p_2$  across both populations this frequency difference more than compensates for the fact that  $\alpha_2 > \alpha_1$ , and sexual selection leads to a global increase in  $t_1$  (and  $p_1$ ). This eventually can lead, as observed, to the global loss of the  $T_2$  allele.
