# Supplementary material for: The Effects on Parapatric Divergence of Linkage between Preference and Trait Loci versus Pleiotropy
Source: MDPI journal article supplement (doi:10.3390/genes9040217), 2018-04-17
Supplement: s1 [file s1]

(a)  $r = 0.001$ , maximum initial LD

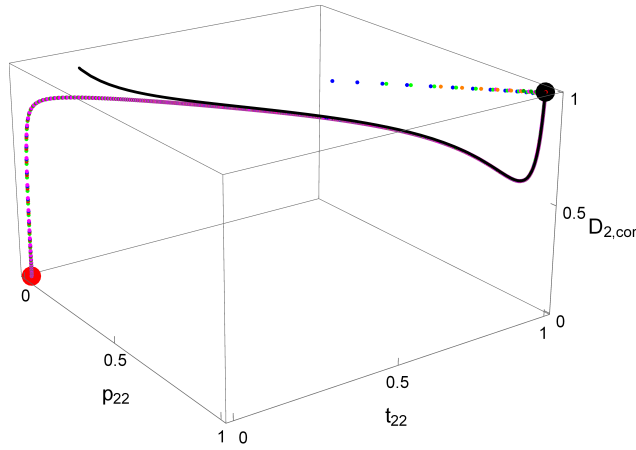

(b)  $r = 0.1$ , maximum initial LD

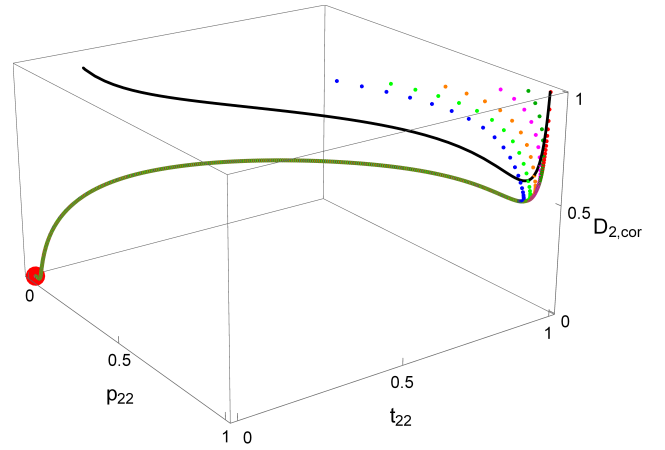

(c)  $r = 0.001$ , no initial LD

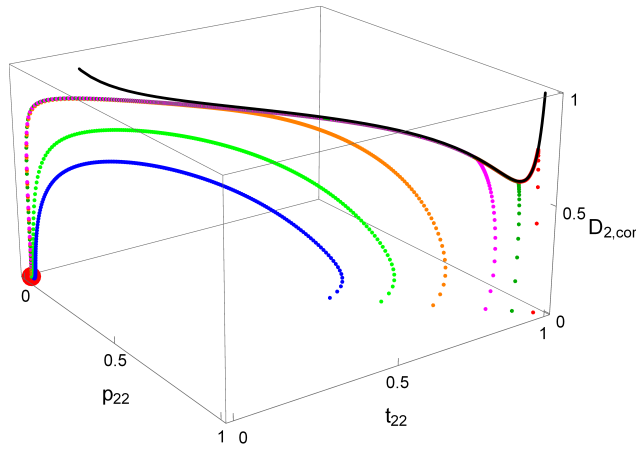

(d)  $r = 0.1$ , no initial LD

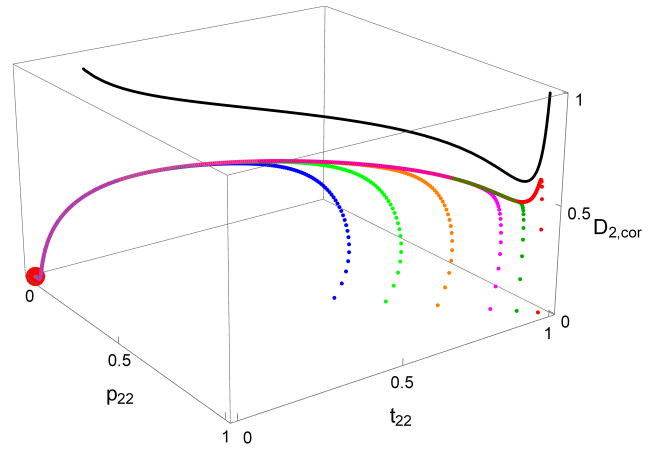

(e)  $r = 0.001$ , moderate initial LD

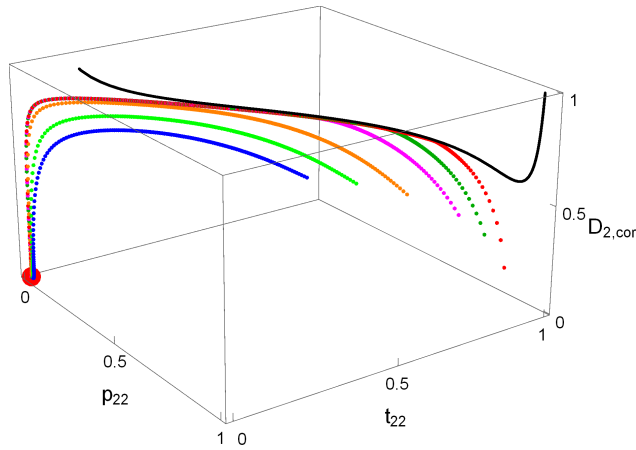

(f)  $r = 0.1$ , moderate initial LD

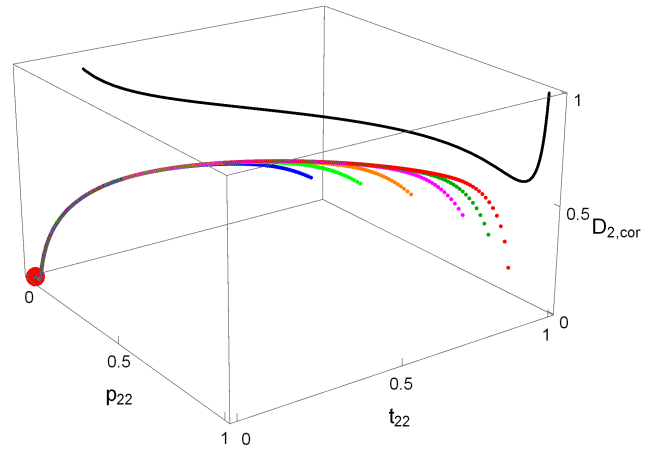

**Figure S8.** The effects of initial conditions and recombination rates on evolutionary trajectories when the trait is expressed in both sexes and there is continent-to-island migration. This figure is analogous to Figure 3 in the main text with the difference that here there is one-way migration into population 2, i.e.,  $m_1 = 0$  and  $m_2 = 0.01$ . In addition, here the black curve shows the equilibria for  $r = 0$ .
