# Supplementary material for: The Effects on Parapatric Divergence of Linkage between Preference and Trait Loci versus Pleiotropy
Source: MDPI journal article supplement (doi:10.3390/genes9040217), 2018-04-17
Supplement: s1 [file s1]

# Simulations starting from allopatric equilibrium

From Servedio and Bürger, The Effects on Parapatric Divergence of Linkage between Preference and Trait Loci versus Pleiotropy, *Genes*

Double click on the arrows on the right-hand side to open each sub-section

## Simulation program with T expressed in both sexes

```
PTmigprog := (  
  c1 = 41; (* number of items in alphaparams *)  
  k1c = 1; (* number of items in p2params *)  
  k2c = 1; (* number of items in t2params *)  
  eqp2pop1 = Table[0, {count, c1}];  
  eqt2pop1 = Table[0, {count, c1}];  
  eqdiseqp1 = Table[0, {count, c1}];  
  eqp2pop2 = Table[0, {count, c1}];  
  eqt2pop2 = Table[0, {count, c1}];  
  eqdiseqp2 = Table[0, {count, c1}];  
  eqp2popdiff = Table[0, {count, c1}];  
  eqt2popdiff = Table[0, {count, c1}];  
  (*plot1=Table[0,{count,c1},{k2,k2c},{k1,k1c}];  
  plot2=Table[0,{count,c1},{k2,k2c},{k1,k1c}];*)  
  Do[aparams = {0.05, 0.07, 0.1, 0.2, 0.5, 0.6, 0.7, 0.8, 0.9, 1.0, 1.5, 2.0, 3.0, 5.0,  
    6.0, 7.0, 8.0, 9.0, 10.0, 11.0, 12.0, 13.0, 14.0, 15.0, 16.0, 17.0, 18.0, 19.0,  
    20.0, 22.5, 25.0, 30.0, 35.0, 40.0, 35.0, 50.0, 60.0, 75.0, 100.0, 150.0, 200.0};  
    a2 = aparams[[count]];  
    a1 = aparams[[count]];  
    gen = 1;  
    t22 = 0.95;  
  
    p2curve[t2_, s_, a1_, a2_] :=  
      -  $\frac{1}{(1+s)^2 (1+s t2) (a1+a2+a1 a2)}$  (3 s + 2 s2 + 8 s2 t2 + 5 s3 t2 + 7 s3 t22 + 4 s4 t22 + 2 s4 t23 +  
        s5 t23 - a1 + s a1 + s2 a1 - 4 s t2 a1 + s2 t2 a1 + 2 s3 t2 a1 - 5 s2 t22 a1 - s3 t22 a1 +  
        s4 t22 a1 - 2 s3 t23 a1 - s4 t23 a1 + 3 s t2 a2 + 5 s2 t2 a2 + 2 s3 t2 a2 + 5 s2 t22 a2 +  
        8 s3 t22 a2 + 3 s4 t22 a2 + 2 s3 t23 a2 + 3 s4 t23 a2 + s5 t23 a2 - t2 a1 a2 + 2 s2 t2 a1 a2 +  
        s3 t2 a1 a2 - 3 s t22 a1 a2 - 3 s2 t22 a1 a2 + s3 t22 a1 a2 + s4 t22 a1 a2 - 2 s2 t23 a1 a2 -
```

```

3 s^3 t2^3 a1 a2 - s^4 t2^3 a1 a2 - s sqrt((1 + s t2) (1 + s t2 + a1 - t2 a1) (1 + t2 a2 + s t2 (1 + a2))
(1 + a1 - t2 a1 + t2 a2 + s^5 t2^3 (1 + a2) + s t2 (5 - 2 (-1 + t2) a1 + (3 + 2 t2) a2) +
s^4 t2^2 (5 + (4 + t2) a2 - (-1 + t2) a1 (1 + a2)) + s^3 t2 (-t2^2 a1 a2 + (2 + a1) (2 + a2) +
t2 (6 - 2 a1 + 8 a2)) + s^2 t2 (6 + 4 a2 + a1 (2 + a2) + t2 (4 + 6 a2 - a1 (2 + a2))))));

discurve[t2_, s_, a1_, a2_] :=
1 / ((1 + s)^2 (a1 + a2 + a1 a2)) (1 + 4 s t2 + s^2 t2 + 5 s^2 t2^2 + 2 s^3 t2^2 + 2 s^3 t2^3 + s^4 t2^3 + a1 -
t2 a1 + 3 s t2 a1 + s^2 t2 a1 - 3 s t2^2 a1 + s^2 t2^2 a1 + s^3 t2^2 a1 - 2 s^2 t2^3 a1 - s^3 t2^3 a1 +
t2 a2 + s t2 a2 + 3 s t2^2 a2 + 4 s^2 t2^2 a2 + s^3 t2^2 a2 + 2 s^2 t2^3 a2 + 3 s^3 t2^3 a2 + s^4 t2^3 a2 +
t2 a1 a2 + s t2 a1 a2 - t2^2 a1 a2 + s t2^2 a1 a2 + 3 s^2 t2^2 a1 a2 + s^3 t2^2 a1 a2 - 2 s t2^3 a1 a2 -
3 s^2 t2^3 a1 a2 - s^3 t2^3 a1 a2 - sqrt((1 + s t2) (1 + s t2 + a1 - t2 a1) (1 + t2 a2 + s t2 (1 + a2))
(1 + a1 - t2 a1 + t2 a2 + s^5 t2^3 (1 + a2) + s t2 (5 - 2 (-1 + t2) a1 + (3 + 2 t2) a2) +
s^4 t2^2 (5 + (4 + t2) a2 - (-1 + t2) a1 (1 + a2)) + s^3 t2 (-t2^2 a1 a2 + (2 + a1) (2 + a2) + t2
(6 - 2 a1 + 8 a2)) + s^2 t2 (6 + 4 a2 + a1 (2 + a2) + t2 (4 + 6 a2 - a1 (2 + a2))))));

p22 = p2curve[t22, s, a1, a2];
diseq2 = discurve[t22, s, a1, a2];
t12 = 0.07;
p12 = 1 - p2curve[1 - t12, s, a1, a2];
diseq1 = discurve[1 - t12, s, a1, a2];

x1[1] = (1 - p12) (1 - t12) + diseq1;
x1[2] = (1 - p12) t12 - diseq1;
x1[3] = p12 (1 - t12) - diseq1;
x1[4] = p12 t12 + diseq1;
x2[1] = (1 - p22) (1 - t22) + diseq2;
x2[2] = (1 - p22) t22 - diseq2;
x2[3] = p22 (1 - t22) - diseq2;
x2[4] = p22 t22 + diseq2;

(*override allele freqs for full LD*)
*x1[1] = 1.0;
x1[2] = 0;
x1[3] = 0;
x1[4] = 0;
x2[1] = 0.05;
x2[2] = 0;
x2[3] = 0;
x2[4] = 0.95;*)

Do[x1t1[cc] = 0, {cc, 1, 4}];
Do[x2t1[cc] = 0, {cc, 1, 4}];

```

```

F1 = Table[0, {i, 4}, {j, 4}];
F2 = Table[0, {i, 4}, {j, 4}];

Coef = Table[1, {i, 4}, {j, 4}];
Do[Coef[[i, 1]] = (1 +  $\alpha_1$ ), {i, 1, 2}];
Do[Coef[[i, 3]] = (1 +  $\alpha_1$ ), {i, 1, 2}];
Do[Coef[[i, 2]] = (1 +  $\alpha_2$ ), {i, 3, 4}];
Do[Coef[[i, 4]] = (1 +  $\alpha_2$ ), {i, 3, 4}];

While[(gen < numgen),

  If[gen > 1,
    Do[x1[cc] = x1t1[cc], {cc, 1, 4}];
    Do[x2[cc] = x2t1[cc], {cc, 1, 4}]; (* recursions *)

    x1m[1] = (1 - m1) x1[1] + m1 x2[1];
    x1m[2] = (1 - m1) x1[2] + m1 x2[2];
    x1m[3] = (1 - m1) x1[3] + m1 x2[3];
    x1m[4] = (1 - m1) x1[4] + m1 x2[4];

    x2m[1] = (1 - m2) x2[1] + m2 x1[1];
    x2m[2] = (1 - m2) x2[2] + m2 x1[2];
    x2m[3] = (1 - m2) x2[3] + m2 x1[3];
    x2m[4] = (1 - m2) x2[4] + m2 x1[4];

    w1barm = x1m[1] (1 + s) + x1m[2] + x1m[3] (1 + s) + x1m[4];
    xnsml[1] = x1m[1] (1 + s) / w1barm;
    xnsml[2] = x1m[2] / w1barm;
    xnsml[3] = x1m[3] (1 + s) / w1barm;
    xnsml[4] = x1m[4] / w1barm;

    Do[xnsf1[i] = xnsml[i], {i, 4}];

    w2barm = x2m[1] + (1 + s) x2m[2] + x2m[3] + (1 + s) x2m[4];
    xnsml[1] = x2m[1] / w2barm;
    xnsml[2] = (1 + s) x2m[2] / w2barm;
    xnsml[3] = x2m[3] / w2barm;
    xnsml[4] = (1 + s) x2m[4] / w2barm;

    Do[xnsf2[i] = xnsml[i], {i, 4}];

    Mate1 = Table[xnsf1[i] xnsml[j], {i, 4}, {j, 4}];
    G1 = Mate1 Coef;

    Do[z1[i] = Sum[xnsml[j] Coef[[i, j]], {j, 4}], {i, 4}];

```

```

- - - - -

Do[F1[[i, j]] = G1[[i, j]] / z1[i], {i, 4}, {j, 4}];

Mate2 = Table[xnsf2[i] xns2[j], {i, 4}, {j, 4}];
G2 = Mate2 Coef;

Do[z2[i] = Sum[xns2[j] Coef[[i, j]], {j, 4}], {i, 4}];

Do[F2[[i, j]] = G2[[i, j]] / z2[i], {i, 4}, {j, 4}];

x1t1[1] = Simplify[F1[[1, 1]] + (1/2) F1[[1, 2]] + (1/2) F1[[1, 3]] +
  (1/2) (1 - r) F1[[1, 4]] + (1/2) F1[[2, 1]] + (1/2) r F1[[2, 3]] +
  (1/2) F1[[3, 1]] + (1/2) r F1[[3, 2]] + (1/2) (1 - r) F1[[4, 1]]];
x1t1[2] = Simplify[(1/2) F1[[1, 2]] + (1/2) r F1[[1, 4]] + (1/2) F1[[2, 1]] +
  F1[[2, 2]] + (1/2) (1 - r) F1[[2, 3]] + (1/2) F1[[2, 4]] +
  (1/2) (1 - r) F1[[3, 2]] + (1/2) r F1[[4, 1]] + (1/2) F1[[4, 2]]];
x1t1[3] = Simplify[(1/2) F1[[1, 3]] + (1/2) r F1[[1, 4]] + (1/2) (1 - r) F1[[2, 3]] +
  (1/2) F1[[3, 1]] + (1/2) (1 - r) F1[[3, 2]] + F1[[3, 3]] +
  (1/2) F1[[3, 4]] + (1/2) r F1[[4, 1]] + (1/2) F1[[4, 3]]];
x1t1[4] = Simplify[(1/2) (1 - r) F1[[1, 4]] + (1/2) r F1[[2, 3]] +
  (1/2) F1[[2, 4]] + (1/2) r F1[[3, 2]] + (1/2) F1[[3, 4]] +
  (1/2) (1 - r) F1[[4, 1]] + (1/2) F1[[4, 2]] + (1/2) F1[[4, 3]] + F1[[4, 4]]];

x2t1[1] = Simplify[F2[[1, 1]] + (1/2) F2[[1, 2]] + (1/2) F2[[1, 3]] +
  (1/2) (1 - r) F2[[1, 4]] + (1/2) F2[[2, 1]] + (1/2) r F2[[2, 3]] +
  (1/2) F2[[3, 1]] + (1/2) r F2[[3, 2]] + (1/2) (1 - r) F2[[4, 1]]];
x2t1[2] = Simplify[(1/2) F2[[1, 2]] + (1/2) r F2[[1, 4]] + (1/2) F2[[2, 1]] +
  F2[[2, 2]] + (1/2) (1 - r) F2[[2, 3]] + (1/2) F2[[2, 4]] +
  (1/2) (1 - r) F2[[3, 2]] + (1/2) r F2[[4, 1]] + (1/2) F2[[4, 2]]];
x2t1[3] = Simplify[(1/2) F2[[1, 3]] + (1/2) r F2[[1, 4]] + (1/2) (1 - r) F2[[2, 3]] +
  (1/2) F2[[3, 1]] + (1/2) (1 - r) F2[[3, 2]] + F2[[3, 3]] +
  (1/2) F2[[3, 4]] + (1/2) r F2[[4, 1]] + (1/2) F2[[4, 3]]];
x2t1[4] = Simplify[(1/2) (1 - r) F2[[1, 4]] + (1/2) r F2[[2, 3]] +
  (1/2) F2[[2, 4]] + (1/2) r F2[[3, 2]] + (1/2) F2[[3, 4]] +
  (1/2) (1 - r) F2[[4, 1]] + (1/2) F2[[4, 2]] + (1/2) F2[[4, 3]] + F2[[4, 4]]];

gen++;]; (* loop *)

p1t1 = Simplify[x1t1[3] + x1t1[4]];
t1t1 = Simplify[x1t1[2] + x1t1[4]];
diseqt1 = x1t1[1] x1t1[4] - x1t1[2] x1t1[3];
p2t1 = Simplify[x2t1[3] + x2t1[4]];
t2t1 = Simplify[x2t1[2] + x2t1[4]];
diseqt2 = x2t1[1] x2t1[4] - x2t1[2] x2t1[3];

Print["run ", count, ",   α = ", α1, ",   gen = ", gen];

```

```

(*If finding starting p2 and diseq *)
(*eqp2pop1[[count]] = {αparams[[count]],p12};
eqt2pop1[[count]] = {αparams[[count]], t12};
eqdiseqpop1[[count]] = {αparams[[count]],diseq1};
eqp2pop2[[count]]={αparams[[count]],p22};
eqt2pop2[[count]] = {αparams[[count]],t22};
eqdiseqpop2[[count]] = {αparams[[count]],diseq2};
eqp2popdiff[[count]] = {αparams[[count]],p22-p12};
eqt2popdiff[[count]] = {αparams[[count]],t22-t12}*)

eqp2pop1[[count]] = {αparams[[count]], p1t1};
eqt2pop1[[count]] = {αparams[[count]], t1t1};
eqdiseqpop1[[count]] = {αparams[[count]], diseq1t1};
eqp2pop2[[count]] = {αparams[[count]], p2t1};
eqt2pop2[[count]] = {αparams[[count]], t2t1};
eqdiseqpop2[[count]] = {αparams[[count]], diseq2t1};
eqp2popdiff[[count]] = {αparams[[count]], p2t1 - p1t1};
eqt2popdiff[[count]] = {αparams[[count]], t2t1 - t1t1},
{count, c1}]
)

```

Example of code needed to run this:

```

pC = 0;
s = 0.038;
r = 0;
m1 = 0;
m2 = 0.01;
PTmigprog

```

## Simulation program with T expressed only in males

```

PTmigprog := (
  c1 = 41; (* number of items in alphaparams *)
  k1c = 1; (* number of items in p2params *)
  k2c = 1; (* number of items in t2params *)
  eqp2pop1 = Table[0, {count, c1}];
  eqt2pop1 = Table[0, {count, c1}];
  eqdiseqpop1 = Table[0, {count, c1}];
  eqp2pop2 = Table[0, {count, c1}];
  eqt2pop2 = Table[0, {count, c1}];
  eqdiseqpop2 = Table[0, {count, c1}];

```

```

eqp2popdiff = Table[0, {count, c1}];
eqt2popdiff = Table[0, {count, c1}];
(*plot1=Table[0,{count,c1},{k2,k2c},{k1,k1c}];
plot2=Table[0,{count,c1},{k2,k2c},{k1,k1c}];*)
Do[aparams = {0.05, 0.07, 0.1, 0.2, 0.5, 0.6, 0.7, 0.8, 0.9, 1.0, 1.5, 2.0, 3.0, 5.0,
  6.0, 7.0, 8.0, 9.0, 10.0, 11.0, 12.0, 13.0, 14.0, 15.0, 16.0, 17.0, 18.0, 19.0,
  20.0, 22.5, 25.0, 30.0, 35.0, 40.0, 45.0, 50.0, 60.0, 75.0, 100.0, 150.0, 200.0};
  a2 = aparams[[count]];
  a1 = aparams[[count]];
  gen = 1;
  t22 = 0.95;

  p2curve[t2_, s_, a1_, a2_] := - 
$$\frac{(s - a1) (1 + t22 a2 + s t22 (1 + a2))}{(1 + s) (a1 + a2 + a1 a2)}$$
;

  discurve[t2_, s_, a1_, a2_] :=
    
$$\frac{1}{(1 + s)^2 (a1 + a2 + a1 a2)^2} \left( a1 + s a1 + 2 s t2 a1 + 2 s^2 t2 a1 + s^2 t2^2 a1 + s^3 t2^2 a1 + a1^2 + \right.$$


$$s a1^2 - t2 a1^2 + s^2 t2 a1^2 - s t2^2 a1^2 - s^2 t2^2 a1^2 + a2 + s a2 + 2 s t2 a2 + 2 s^2 t2 a2 +$$


$$s^2 t2^2 a2 + s^3 t2^2 a2 + 2 a1 a2 + 2 s a1 a2 + 4 s t2 a1 a2 + 4 s^2 t2 a1 a2 + 2 s^2 t2^2 a1 a2 +$$


$$2 s^3 t2^2 a1 a2 + a1^2 a2 + s a1^2 a2 + 2 s t2 a1^2 a2 + 2 s^2 t2 a1^2 a2 - t2^2 a1^2 a2 -$$


$$3 s t2^2 a1^2 a2 - 2 s^2 t2^2 a1^2 a2 + t2 a2^2 + 2 s t2 a2^2 + s^2 t2 a2^2 + s t2^2 a2^2 + 2 s^2 t2^2 a2^2 +$$


$$s^3 t2^2 a2^2 + 2 t2 a1 a2^2 + 4 s t2 a1 a2^2 + 2 s^2 t2 a1 a2^2 - t2^2 a1 a2^2 - s t2^2 a1 a2^2 +$$


$$s^2 t2^2 a1 a2^2 + s^3 t2^2 a1 a2^2 + t2 a1^2 a2^2 + 2 s t2 a1^2 a2^2 + s^2 t2 a1^2 a2^2 - t2^2 a1^2 a2^2 -$$


$$2 s t2^2 a1^2 a2^2 - s^2 t2^2 a1^2 a2^2 - \sqrt{(1 + s)^2 (1 + s t2 + a1 - t2 a1) (a1 + a2 + a1 a2)^2}$$


$$\left. (1 + t2 a2 + s t2 (1 + a2)) (1 + a1 - t2 a1 + t2 a2 + 2 s t2 (1 + a2) + s^2 t2 (1 + a2)) \right) \right);

  p22 = p2curve[t22, s, a1, a2];
  diseq2 = discurve[t22, s, a1, a2];
  t12 = 0.07;
  p12 = 1 - p2curve[1 - t12, s, a1, a2];
  diseq1 = discurve[1 - t12, s, a1, a2];

  x1[1] = (1 - p12) (1 - t12) + diseq1;
  x1[2] = (1 - p12) t12 - diseq1;
  x1[3] = p12 (1 - t12) - diseq1;
  x1[4] = p12 t12 + diseq1;
  x2[1] = (1 - p22) (1 - t22) + diseq2;
  x2[2] = (1 - p22) t22 - diseq2;
  x2[3] = p22 (1 - t22) - diseq2;
  x2[4] = p22 t22 + diseq2;

  (*override allele freqs for full LD*)
  (*x1[1] = 1.0;
  x1[2] = 0;
  x1[3] = 0;$$

```

```

x1[4] = 0;
x2[1] = 0.05;
x2[2] = 0;
x2[3] = 0;
x2[4] = 0.95;*)

Do[x1t1[cc] = 0, {cc, 1, 4}];
Do[x2t1[cc] = 0, {cc, 1, 4}];

F1 = Table[0, {i, 4}, {j, 4}];
F2 = Table[0, {i, 4}, {j, 4}];

Coef = Table[1, {i, 4}, {j, 4}];
Do[Coef[[i, 1]] = (1 +  $\alpha_1$ ), {i, 1, 2}];
Do[Coef[[i, 3]] = (1 +  $\alpha_1$ ), {i, 1, 2}];
Do[Coef[[i, 2]] = (1 +  $\alpha_2$ ), {i, 3, 4}];
Do[Coef[[i, 4]] = (1 +  $\alpha_2$ ), {i, 3, 4}];

While[(gen < numgen),

  If[gen > 1,
    Do[x1[cc] = x1t1[cc], {cc, 1, 4}];
    Do[x2[cc] = x2t1[cc], {cc, 1, 4}]; (* recursions *)

    x1m[1] = (1 - m1) x1[1] + m1 x2[1];
    x1m[2] = (1 - m1) x1[2] + m1 x2[2];
    x1m[3] = (1 - m1) x1[3] + m1 x2[3];
    x1m[4] = (1 - m1) x1[4] + m1 x2[4];

    x2m[1] = (1 - m2) x2[1] + m2 x1[1];
    x2m[2] = (1 - m2) x2[2] + m2 x1[2];
    x2m[3] = (1 - m2) x2[3] + m2 x1[3];
    x2m[4] = (1 - m2) x2[4] + m2 x1[4];

    w1barm = x1m[1] (1 + s) + x1m[2] + x1m[3] (1 + s) + x1m[4];
    xnsml[1] = x1m[1] (1 + s) / w1barm;
    xnsml[2] = x1m[2] / w1barm;
    xnsml[3] = x1m[3] (1 + s) / w1barm;
    xnsml[4] = x1m[4] / w1barm;

    Do[xnsf1[i] = x1m[i], {i, 4}]; (* Trait not expressed in females *)

    w2barm = x2m[1] + (1 + s) x2m[2] + x2m[3] + (1 + s) x2m[4];
    xnsml[1] = x2m[1] / w2barm;

```

```

xns2[2] = (1 + s) x2m[2] / w2barm;
xns2[3] = x2m[3] / w2barm;
xns2[4] = (1 + s) x2m[4] / w2barm;

Do[xnsf2[i] = x2m[i], {i, 4}]; (* Trait not expressed in females *)

Mate1 = Table[xnsf1[i] xns1[j], {i, 4}, {j, 4}];
G1 = Mate1 Coef;

Do[z1[i] = Sum[xns1[j] Coef[[i, j]], {j, 4}], {i, 4}];

Do[F1[[i, j]] = G1[[i, j]] / z1[i], {i, 4}, {j, 4}];

Mate2 = Table[xnsf2[i] xns2[j], {i, 4}, {j, 4}];
G2 = Mate2 Coef;

Do[z2[i] = Sum[xns2[j] Coef[[i, j]], {j, 4}], {i, 4}];

Do[F2[[i, j]] = G2[[i, j]] / z2[i], {i, 4}, {j, 4}];

x1t1[1] = Simplify[F1[[1, 1]] + (1 / 2) F1[[1, 2]] + (1 / 2) F1[[1, 3]] +
  (1 / 2) (1 - r) F1[[1, 4]] + (1 / 2) F1[[2, 1]] + (1 / 2) r F1[[2, 3]] +
  (1 / 2) F1[[3, 1]] + (1 / 2) r F1[[3, 2]] + (1 / 2) (1 - r) F1[[4, 1]]];
x1t1[2] = Simplify[(1 / 2) F1[[1, 2]] + (1 / 2) r F1[[1, 4]] + (1 / 2) F1[[2, 1]] +
  F1[[2, 2]] + (1 / 2) (1 - r) F1[[2, 3]] + (1 / 2) F1[[2, 4]] +
  (1 / 2) (1 - r) F1[[3, 2]] + (1 / 2) r F1[[4, 1]] + (1 / 2) F1[[4, 2]]];
x1t1[3] = Simplify[(1 / 2) F1[[1, 3]] + (1 / 2) r F1[[1, 4]] + (1 / 2) (1 - r) F1[[2, 3]] +
  (1 / 2) F1[[3, 1]] + (1 / 2) (1 - r) F1[[3, 2]] + F1[[3, 3]] +
  (1 / 2) F1[[3, 4]] + (1 / 2) r F1[[4, 1]] + (1 / 2) F1[[4, 3]]];
x1t1[4] = Simplify[(1 / 2) (1 - r) F1[[1, 4]] + (1 / 2) r F1[[2, 3]] +
  (1 / 2) F1[[2, 4]] + (1 / 2) r F1[[3, 2]] + (1 / 2) F1[[3, 4]] +
  (1 / 2) (1 - r) F1[[4, 1]] + (1 / 2) F1[[4, 2]] + (1 / 2) F1[[4, 3]] + F1[[4, 4]]];

x2t1[1] = Simplify[F2[[1, 1]] + (1 / 2) F2[[1, 2]] + (1 / 2) F2[[1, 3]] +
  (1 / 2) (1 - r) F2[[1, 4]] + (1 / 2) F2[[2, 1]] + (1 / 2) r F2[[2, 3]] +
  (1 / 2) F2[[3, 1]] + (1 / 2) r F2[[3, 2]] + (1 / 2) (1 - r) F2[[4, 1]]];
x2t1[2] = Simplify[(1 / 2) F2[[1, 2]] + (1 / 2) r F2[[1, 4]] + (1 / 2) F2[[2, 1]] +
  F2[[2, 2]] + (1 / 2) (1 - r) F2[[2, 3]] + (1 / 2) F2[[2, 4]] +
  (1 / 2) (1 - r) F2[[3, 2]] + (1 / 2) r F2[[4, 1]] + (1 / 2) F2[[4, 2]]];
x2t1[3] = Simplify[(1 / 2) F2[[1, 3]] + (1 / 2) r F2[[1, 4]] + (1 / 2) (1 - r) F2[[2, 3]] +
  (1 / 2) F2[[3, 1]] + (1 / 2) (1 - r) F2[[3, 2]] + F2[[3, 3]] +
  (1 / 2) F2[[3, 4]] + (1 / 2) r F2[[4, 1]] + (1 / 2) F2[[4, 3]]];
x2t1[4] = Simplify[(1 / 2) (1 - r) F2[[1, 4]] + (1 / 2) r F2[[2, 3]] +
  (1 / 2) F2[[2, 4]] + (1 / 2) r F2[[3, 2]] + (1 / 2) F2[[3, 4]] +
  (1 / 2) (1 - r) F2[[4, 1]] + (1 / 2) F2[[4, 2]] + (1 / 2) F2[[4, 3]] + F2[[4, 4]]];

```



```

    gen++;]; (* loop *)

    p1t1 = Simplify[x1t1[3] + x1t1[4]];
    t1t1 = Simplify[x1t1[2] + x1t1[4]];
    diseq1t1 = x1t1[1] x1t1[4] - x1t1[2] x1t1[3];
    p2t1 = Simplify[x2t1[3] + x2t1[4]];
    t2t1 = Simplify[x2t1[2] + x2t1[4]];
    diseq2t1 = x2t1[1] x2t1[4] - x2t1[2] x2t1[3];

    Print["run ", count, ",   $\alpha$  = ",  $\alpha_1$ , ",  gen = ", gen];

    (*If finding starting p2 an diseq *)
    (*eqp2pop1[[count]] = { $\alpha$ params[[count]],p12};
    eqt2pop1[[count]] = { $\alpha$ params[[count]], t12};
    eqdiseqpop1[[count]] = { $\alpha$ params[[count]],diseq1};
    eqp2pop2[[count]] = { $\alpha$ params[[count]],p22};
    eqt2pop2[[count]] = { $\alpha$ params[[count]],t22};
    eqdiseqpop2[[count]] = { $\alpha$ params[[count]],diseq2};
    eqp2popdiff[[count]] = { $\alpha$ params[[count]],p22-p12};
    eqt2popdiff[[count]] = { $\alpha$ params[[count]],t22-t12}*)

    eqp2pop1[[count]] = { $\alpha$ params[[count]], p1t1};
    eqt2pop1[[count]] = { $\alpha$ params[[count]], t1t1};
    eqdiseqpop1[[count]] = { $\alpha$ params[[count]], diseq1t1};
    eqp2pop2[[count]] = { $\alpha$ params[[count]], p2t1};
    eqt2pop2[[count]] = { $\alpha$ params[[count]], t2t1};
    eqdiseqpop2[[count]] = { $\alpha$ params[[count]], diseq2t1};
    eqp2popdiff[[count]] = { $\alpha$ params[[count]], p2t1 - p1t1};
    eqt2popdiff[[count]] = { $\alpha$ params[[count]], t2t1 - t1t1},
    {count, c1}]
  )

```

Example of code needed to run this:

```

pC = 0;
s = 0.038;
r = 0;
m1 = 0;
m2 = 0.01;
PTmigprog

```
