# Supplementary material for: The Effects on Parapatric Divergence of Linkage between Preference and Trait Loci versus Pleiotropy
Source: MDPI journal article supplement (doi:10.3390/genes9040217), 2018-04-17
Supplement: s1 [file s1]

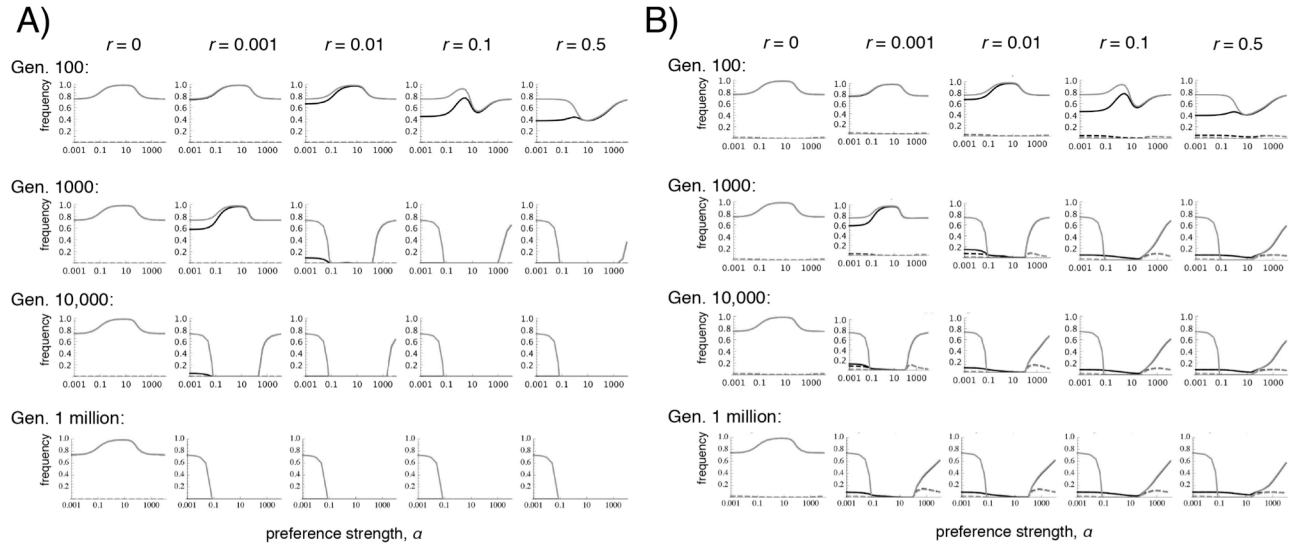

Figure S6. Preference and trait divergence at 100, 1000, 10,000, and 1 million generations after secondary contact when the trait is expressed in both sexes. The parameter values and legend follow Figure 1. a) Continent-island migration:  $m_1 = 0, m_2 = 0.01$ , b) asymmetric migration:  $m_1 = 0.001, m_2 = 0.01$ .
