# Supplementary material for: The Effects on Parapatric Divergence of Linkage between Preference and Trait Loci versus Pleiotropy
Source: MDPI journal article supplement (doi:10.3390/genes9040217), 2018-04-17
Supplement: s1 [file s1]

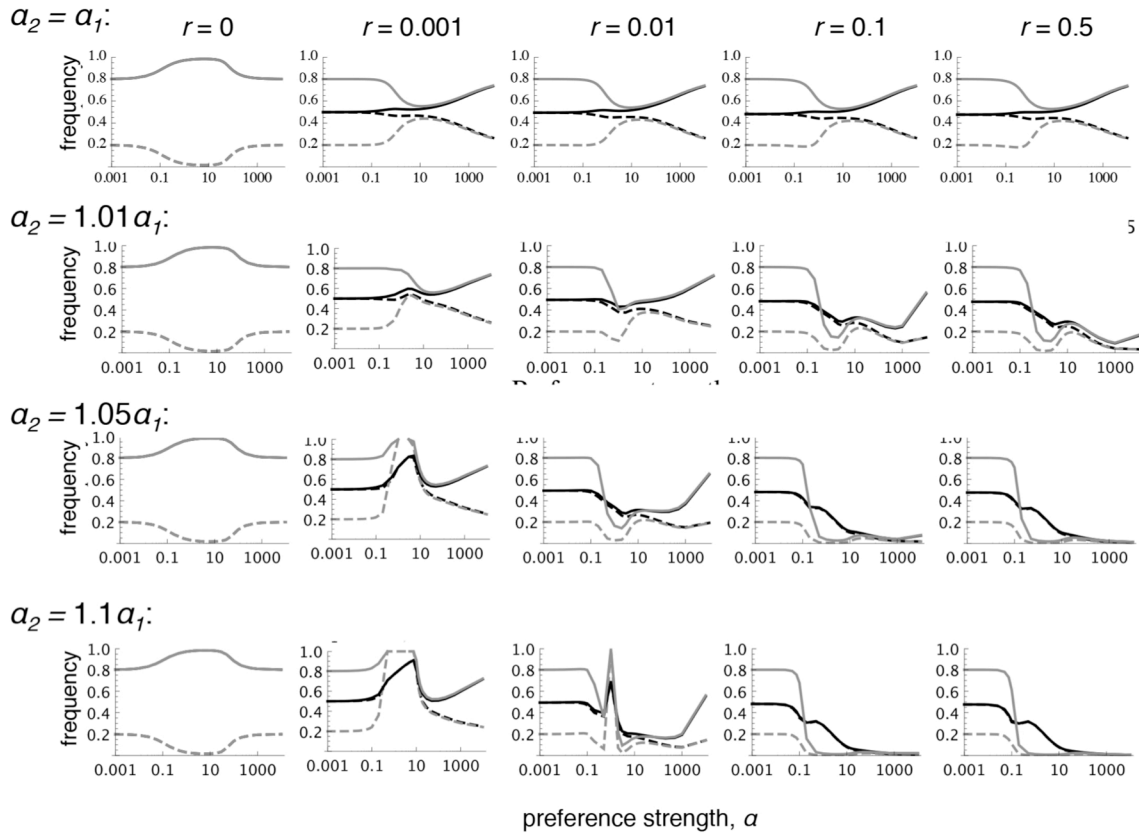

Figure S10. Preference and trait divergence at 1 million generations after secondary contact when the trait is expressed in both sexes and preference strengths are asymmetric (as marked). The parameter values and legend follow Figure 1.
