# Supplementary material for: The Effects on Parapatric Divergence of Linkage between Preference and Trait Loci versus Pleiotropy
Source: MDPI journal article supplement (doi:10.3390/genes9040217), 2018-04-17
Supplement: s1 [file s1]

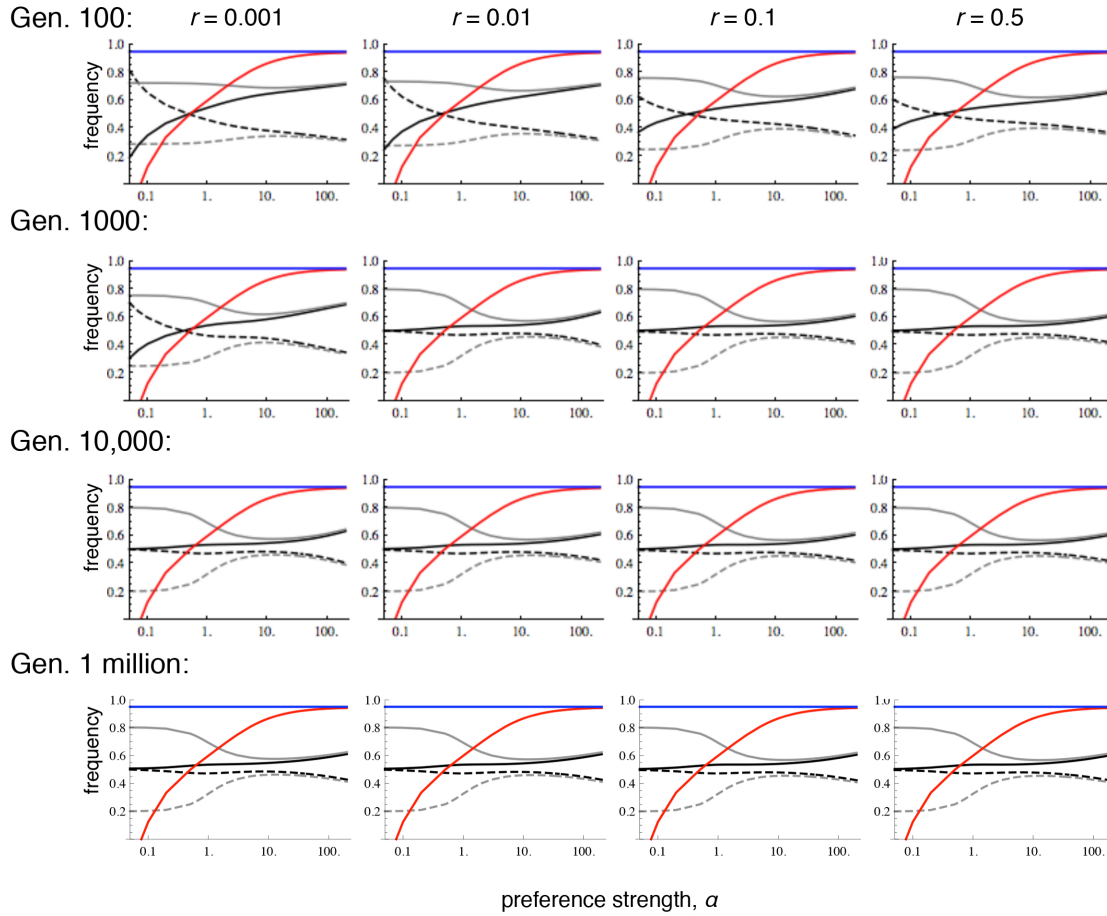

Figure S2. Preference and trait divergence at 100, 1000, 10,000, and 1 million generations after secondary contact when the trait is expressed in both sexes. The parameter values and legend follow Figure 1. Blue represents the starting conditions for  $t_2$  ( $=0.95$ ) in population 2 (compare to the grey solid lines), and Red lines represent the equilibrium starting conditions for  $p_2$  in population 2 in allopatry given the blue value for  $t_2$  (compare with the black solid lines for the endpoints for  $P_2$ ). The starting conditions of population 1 (not shown) are  $t_2 = 0.07$ , yielding a  $p_2$  roughly one minus the values in the red line.
