# Supplementary material for: The Effects on Parapatric Divergence of Linkage between Preference and Trait Loci versus Pleiotropy
Source: MDPI journal article supplement (doi:10.3390/genes9040217), 2018-04-17
Supplement: s1 [file s1]

# Supplementary Material File S3:

## The preference/trait model with natural selection on both sexes, recombination between the preference and trait loci, and migration between two demes

by

Maria Servedio and Reinhard Bürger

### ■ I. Model and derivation of recursion relations

P2 is a preference allele for T2, with strength  $\alpha_2$ ,

P1 is a preference allele for T1, with strength  $\alpha_1$ .

Migration into deme 1 occurs at rate  $m_1$ , i.e., a fraction  $m_1$  of individuals in deme 1 is replaced by individuals from deme 2; migration into deme 2 occurs at rate  $m_2$ .

T1 (T2) is favored by viability selection in both sexes in deme 1 (2) with selection coefficient  $s_1$  ( $s_2$ ).

The recombination rate between the P and T locus is  $r \geq 0$ .

There are the four genotypes P1T1, P1T2, P2T1, and P2T2. Their frequencies are denoted by

$x_1[1]$  = frequency of P1T1 in deme 1

$x_1[2]$  = frequency of P1T2 in deme 1

$x_1[3]$  = frequency of P2T1 in deme 1

$x_1[4]$  = frequency of P2T2 in deme 1

$x_2[1]$  = frequency of P1T1 in deme 2

$x_2[2]$  = frequency of P1T2 in deme 2

$x_2[3]$  = frequency of P2T1 in deme 2

$x_2[4]$  = frequency of P2T2 in deme 2

We use mainly allele frequencies and linkage disequilibria to describe the dynamics:

$p_{12} = x_1[3] + x_1[4]$  = frequency of preference allele P2 in deme 1 (Note: the ordering of subscripts differs from that in the manuscript)

$t_{12} = x_1[2] + x_1[4]$  = frequency of trait allele T2 in deme 1 (Note: the ordering of subscripts differs from that in the manuscript)

$dd_1 = x_1[1]x_1[4] - x_1[2]x_1[3]$  = linkage disequilibrium between P and T in deme 1

$p_{22}$ ,  $t_{22}$ ,  $dd_2$  are the analogous quantities in deme 2

The phenotype-matching model is obtained as a special case if  $r = 0$  and  $p_{12} = t_{12}$  and  $p_{22} = t_{22}$ . As a consequence, linkage disequilibrium is maximal, i.e.,  $dd_1 = t_{12}(1-t_{12})$  and  $dd_2 = t_{22}(1-t_{22})$ .

## I.1 Modeling the stages of the life cycle

### I.1.1 Migration

Gamete frequencies after migration

$$\begin{aligned}x_{1m}[1] &= (1 - m_1) x_1[1] + m_1 x_2[1]; \\x_{1m}[2] &= (1 - m_1) x_1[2] + m_1 x_2[2]; \\x_{1m}[3] &= (1 - m_1) x_1[3] + m_1 x_2[3]; \\x_{1m}[4] &= (1 - m_1) x_1[4] + m_1 x_2[4];\end{aligned}$$

$$\begin{aligned}x_{2m}[1] &= (1 - m_2) x_2[1] + m_2 x_1[1]; \\x_{2m}[2] &= (1 - m_2) x_2[2] + m_2 x_1[2]; \\x_{2m}[3] &= (1 - m_2) x_2[3] + m_2 x_1[3]; \\x_{2m}[4] &= (1 - m_2) x_2[4] + m_2 x_1[4];\end{aligned}$$

### I.1.2 Viability selection

Gamete frequencies after viability selection

pop 1

$$w_{1\bar{}} = 1 + s_1 (x_{1m}[1] + x_{1m}[3]);$$

$$\begin{aligned}x_{1v}[1] &= x_{1m}[1] (1 + s_1) / w_{1\bar{}}; \\x_{1v}[2] &= x_{1m}[2] / w_{1\bar{}}; \\x_{1v}[3] &= x_{1m}[3] (1 + s_1) / w_{1\bar{}}; \\x_{1v}[4] &= x_{1m}[4] / w_{1\bar{}};\end{aligned}$$

pop 2

$$w_{2\bar{}} = 1 + s_2 (x_{2m}[2] + x_{2m}[4]);$$

$$\begin{aligned}x_{2v}[1] &= x_{2m}[1] / w_{2\bar{}}; \\x_{2v}[2] &= (1 + s_2) x_{2m}[2] / w_{2\bar{}}; \\x_{2v}[3] &= x_{2m}[3] / w_{2\bar{}}; \\x_{2v}[4] &= (1 + s_2) x_{2m}[4] / w_{2\bar{}};\end{aligned}$$

### I.1.3 Sexual selection

P1 prefers T1 (by a factor of  $1 + \alpha_1$ ), and P2 prefers T2 (by a factor of  $1 + \alpha_2$ )

pop 1

```

Mate1 = Table[x1v[i] x1v[j], {i, 4}, {j, 4}];
Coef = Table[1, {i, 4}, {j, 4}];
Do[Coef[[i, 1]] =  $(1 + \alpha_1)$ , {i, 1, 2}];
Do[Coef[[i, 3]] =  $(1 + \alpha_1)$ , {i, 1, 2}];
Do[Coef[[i, 2]] =  $(1 + \alpha_2)$ , {i, 3, 4}];
Do[Coef[[i, 4]] =  $(1 + \alpha_2)$ , {i, 3, 4}];
G1 = Mate1 Coef;

```

`Simplify[Coef] // TableForm`
$$\begin{array}{cccc} 1 + \alpha 1 & 1 & 1 + \alpha 1 & 1 \\ 1 + \alpha 1 & 1 & 1 + \alpha 1 & 1 \\ 1 & 1 + \alpha 2 & 1 & 1 + \alpha 2 \\ 1 & 1 + \alpha 2 & 1 & 1 + \alpha 2 \end{array}$$

```
Do[z1[i] = Sum[x1v[j] Coef[[i, j]], {j, 4}], {i, 4}]
```

```
F1 = Table[0, {i, 4}, {j, 4}];
Do[F1[[i, j]] = G1[[i, j]] / z1[i], {i, 4}, {j, 4}];
```

TableForm[Simplify[F1]]

$$\frac{\frac{(-1+s1)((-1+m1)x1[1]+(-1+m1)x1[3]-m1(x2[1]+x2[3]))(-(-1+m1)(1+s1)(1+\alpha1)x1[1]+x1[2]-m1x1[2]+x1[3]-m1x1[3]+s1x1[3])}{(-1+s1)((-1+m1)x1[1]+(-1+m1)x1[3]-m1(x2[1]+x2[3]))(-(-1+m1)(1+s1)(1+\alpha1)x1[1]+x1[2]-m1x1[2]+x1[3]-m1x1[3]+s1x1[3])} - \frac{(1+s1)^2((-1+m1)x1[1]-m1}{(-1+s1)((-1+m1)x1[1]+(-1+m1)x1[3]-m1(x2[1]+x2[3]))(-(-1+m1)(1+s1)x1[1]-(-1+m1)(1+\alpha2)x1[2]+x1[3]-m1x1[3]+s1x1[3])} - \frac{(1+s1)((-1+m1)x1[1]-m1}{(-1+s1)((-1+m1)x1[1]+(-1+m1)x1[3]-m1(x2[1]+x2[3]))(-(-1+m1)(1+s1)x1[1]-(-1+m1)(1+\alpha2)x1[2]+x1[3]-m1x1[3]+s1x1[3])}$$

pop 2

```
Mate2 = Table[x2v[i] x2v[j], {i, 4}, {j, 4}];
G2 = Mate2 Coef;
```

```
Do[z2[i] = Sum[x2v[j] Coef[[i, j]], {j, 4}], {i, 4}]
```

```
F2 = Table[0, {i, 4}, {j, 4}];
Do[F2[[i, j]] = G2[[i, j]] / z2[i], {i, 4}, {j, 4}];
```

TableForm[F2]

|                                                                                                 |                                                                                                 |                                                                                                 |
|-------------------------------------------------------------------------------------------------|-------------------------------------------------------------------------------------------------|-------------------------------------------------------------------------------------------------|
| $(1+\alpha) \text{ xnsf2}[1] \text{ xnsf2}[1]$                                                  | $\text{xnsf2}[1] \text{ xnsf2}[2]$                                                              | $(1+\alpha)$                                                                                    |
| $(1+\alpha) \text{ xnsf2}[1] + \text{xnsf2}[2] + (1+\alpha) \text{ xnsf2}[3] + \text{xnsf2}[4]$ | $(1+\alpha) \text{ xnsf2}[1] + \text{xnsf2}[2] + (1+\alpha) \text{ xnsf2}[3] + \text{xnsf2}[4]$ | $(1+\alpha) \text{ xnsf2}[1] + \text{xnsf2}[2] + (1+\alpha) \text{ xnsf2}[3] + \text{xnsf2}[4]$ |
| $(1+\alpha) \text{ xnsf2}[2] \text{ xnsf2}[1]$                                                  | $\text{xnsf2}[2] \text{ xnsf2}[2]$                                                              | $(1+\alpha)$                                                                                    |
| $(1+\alpha) \text{ xnsf2}[1] + \text{xnsf2}[2] + (1+\alpha) \text{ xnsf2}[3] + \text{xnsf2}[4]$ | $(1+\alpha) \text{ xnsf2}[1] + \text{xnsf2}[2] + (1+\alpha) \text{ xnsf2}[3] + \text{xnsf2}[4]$ | $(1+\alpha) \text{ xnsf2}[1] + \text{xnsf2}[2] + (1+\alpha) \text{ xnsf2}[3] + \text{xnsf2}[4]$ |
| $\text{xnsf2}[3] \text{ xnsf2}[1]$                                                              | $(1+\alpha) \text{ xnsf2}[3] \text{ xnsf2}[2]$                                                  | $\text{xnsf2}[3]$                                                                               |
| $\text{xnsf2}[1] + (1+\alpha) \text{ xnsf2}[2] + \text{xnsf2}[3] + (1+\alpha) \text{ xnsf2}[4]$ | $\text{xnsf2}[1] + (1+\alpha) \text{ xnsf2}[2] + \text{xnsf2}[3] + (1+\alpha) \text{ xnsf2}[4]$ | $\text{xnsf2}[1] + (1+\alpha) \text{ xnsf2}[2] + \text{xnsf2}[3] + (1+\alpha) \text{ xnsf2}[4]$ |
| $\text{xnsf2}[4] \text{ xnsf2}[1]$                                                              | $(1+\alpha) \text{ xnsf2}[4] \text{ xnsf2}[2]$                                                  | $\text{xnsf2}[4]$                                                                               |
| $\text{xnsf2}[1] + (1+\alpha) \text{ xnsf2}[2] + \text{xnsf2}[3] + (1+\alpha) \text{ xnsf2}[4]$ | $\text{xnsf2}[1] + (1+\alpha) \text{ xnsf2}[2] + \text{xnsf2}[3] + (1+\alpha) \text{ xnsf2}[4]$ | $\text{xnsf2}[1] + (1+\alpha) \text{ xnsf2}[2] + \text{xnsf2}[3] + (1+\alpha) \text{ xnsf2}[4]$ |

### 1.1.4 Recombination

pop 1

```

x1t1[1] = Simplify[F1[[1, 1]] + (1/2) F1[[1, 2]] + (1/2) F1[[1, 3]] +
  (1/2) (1 - r) F1[[1, 4]] + (1/2) F1[[2, 1]] + (1/2) r F1[[2, 3]] +
  (1/2) F1[[3, 1]] + (1/2) r F1[[3, 2]] + (1/2) (1 - r) F1[[4, 1]]];

x1t1[2] = Simplify[(1/2) F1[[1, 2]] + (1/2) r F1[[1, 4]] +
  (1/2) F1[[2, 1]] + F1[[2, 2]] + (1/2) (1 - r) F1[[2, 3]] +
  (1/2) F1[[2, 4]] + (1/2) (1 - r) F1[[3, 2]] +
  (1/2) r F1[[4, 1]] + (1/2) F1[[4, 2]]];

x1t1[3] = Simplify[(1/2) F1[[1, 3]] + (1/2) r F1[[1, 4]] +
  (1/2) (1 - r) F1[[2, 3]] + (1/2) F1[[3, 1]] +
  (1/2) (1 - r) F1[[3, 2]] + F1[[3, 3]] + (1/2) F1[[3, 4]] +
  (1/2) r F1[[4, 1]] + (1/2) F1[[4, 3]]];

x1t1[4] = Simplify[(1/2) (1 - r) F1[[1, 4]] + (1/2) r F1[[2, 3]] +
  (1/2) F1[[2, 4]] + (1/2) r F1[[3, 2]] + (1/2) F1[[3, 4]] +
  (1/2) (1 - r) F1[[4, 1]] + (1/2) F1[[4, 2]] + (1/2) F1[[4, 3]] + F1[[4, 4]]];

pop 2

x2t1[1] = Simplify[F2[[1, 1]] + (1/2) F2[[1, 2]] + (1/2) F2[[1, 3]] +
  (1/2) (1 - r) F2[[1, 4]] + (1/2) F2[[2, 1]] + (1/2) r F2[[2, 3]] +
  (1/2) F2[[3, 1]] + (1/2) r F2[[3, 2]] + (1/2) (1 - r) F2[[4, 1]]];

x2t1[2] = Simplify[(1/2) F2[[1, 2]] + (1/2) r F2[[1, 4]] +
  (1/2) F2[[2, 1]] + F2[[2, 2]] + (1/2) (1 - r) F2[[2, 3]] +
  (1/2) F2[[2, 4]] + (1/2) (1 - r) F2[[3, 2]] +
  (1/2) r F2[[4, 1]] + (1/2) F2[[4, 2]]];

x2t1[3] = Simplify[(1/2) F2[[1, 3]] + (1/2) r F2[[1, 4]] +
  (1/2) (1 - r) F2[[2, 3]] + (1/2) F2[[3, 1]] +
  (1/2) (1 - r) F2[[3, 2]] + F2[[3, 3]] + (1/2) F2[[3, 4]] +
  (1/2) r F2[[4, 1]] + (1/2) F2[[4, 3]]];

x2t1[4] = Simplify[(1/2) (1 - r) F2[[1, 4]] + (1/2) r F2[[2, 3]] +
  (1/2) F2[[2, 4]] + (1/2) r F2[[3, 2]] + (1/2) F2[[3, 4]] +
  (1/2) (1 - r) F2[[4, 1]] + (1/2) F2[[4, 2]] + (1/2) F2[[4, 3]] + F2[[4, 4]]];

```

## I.2 Recursion relation for allele frequencies and LD

The notation here is that the 1st subscript represents the population and the second represents the allele.

So all is done with respect to allele 2 in both populations.

### I.2.1 Derivation of the recursion relations

```

x1[1] = (1 - p12) (1 - t12) + dd1;
x1[2] = (1 - p12) t12 - dd1;
x1[3] = p12 (1 - t12) - dd1;
x1[4] = p12 t12 + dd1;
x2[1] = (1 - p22) (1 - t22) + dd2;
x2[2] = (1 - p22) t22 - dd2;
x2[3] = p22 (1 - t22) - dd2;
x2[4] = p22 t22 + dd2;

p1t1 = Simplify[x1t1[3] + x1t1[4]]
t1t1 = Simplify[x1t1[2] + x1t1[4]]

```

```

dd1t1 = x1t1[1] x1t1[4] - x1t1[2] x1t1[3]
p2t1 = Simplify[x2t1[3] + x2t1[4]]
t2t1 = Simplify[x2t1[2] + x2t1[4]]
dd2t1 = x2t1[1] x2t1[4] - x2t1[2] x2t1[3]

```

## 1.2.2 The main recursion relation, itgen[s1, s2, α1, α2, m1, m2, r][{p12, t12, dd1, p22, t22, dd2}]

For given parameters {s1, s2, α1, α2, m1, m2, r}, itgen computes {p12 (t + 1), t12 (t + 1), dd1 (t + 1), p22 (t + 1), t22 (t + 1), dd2 (t + 1)} from {p12 (t), t12 (t), dd1 (t), p22 (t), t22 (t), dd2 (t)}.

Because computation of p1t1 etc (see above) is time consuming, we define itgen[s1, s2, α1, α2, m1, m2, r][{p12, t12, dd1, p22, t22, dd2}] explicitly by the right-hand side of {p1t1, t1t1, dd1t1, p2t1, t2t1, dd2t1}.

```

itgen[s1_, s2_, α1_, α2_, m1_, m2_, r_] [{p12_, t12_, dd1_, p22_, t22_, dd2_}] :=
{
  (-(-1 + m1)^2 m1 p12^2 (1 + s1) (-1 + s1 (-1 + t12)) (t12 - t22) (α1 + α2 + α1 α2) -
    dd1 (α1 + 2 s1^3 (-1 + t12)^2 (1 + α1) + t12 α1 α2 +
      s1 (2 + dd1 α2 + 2 t12 α2 + α1 (4 + dd1 - 3 t12 + dd1 α2 + 3 t12 α2 - 2 t12^2 α2)) +
      s1^2 (4 + dd1 α2 - 2 t12^2 (α1 (-1 + α2) + α2) +
        α1 (5 + dd1 + dd1 α2) + t12 (-4 - 7 α1 + 2 α2 + 2 α1 α2))) -
    m1^3 (t12 - t22) (-2 (dd1 - dd2) s1 (t12 - t22) (s1 + α1 + s1 α1) (s1 - α2) +
      p22^2 (1 + s1) (-1 + s1 (-1 + t22)) (α1 + α2 + α1 α2) +
      p22 (2 s1^3 (t12 - t22) (-1 + t22) (1 + α1) + (t12 - t22) α1 α2 +
        s1 (-dd1 (α1 + α2 + α1 α2) + dd2 (α1 + α2 + α1 α2) - (t12 - t22)
          (α1 - 2 α2 - 3 α1 α2 + 2 t22 α1 α2)) + s1^2 (t22 (2 + α1 (3 - 2 α2) - 2 α2) + 2
            t22^2 (α1 (-1 + α2) + α2) - (dd1 - dd2) (α1 + α2 + α1 α2) + t12
              (-2 + 2 α2 - 2 t22 α2 + α1 (-3 + 2 t22 + 2 α2 - 2 t22 α2)))) +
    m1 (-dd2 (-α1 + 2 s1^2 (-1 + t12) (1 + α1) + s1 (-2 + (-3 + 2 t12) α1))
      (-1 + s1 (-1 + t12) - t12 α2) + 2 dd1^2 s1 (1 + s1) (α1 + α2 + α1 α2) +
      dd1 (2 s1^3 (-1 + t12) (-1 + 3 t12 - 2 t22) (1 + α1) + α1 (1 + 2 t12 α2 - t22 α2) +
        s1^2 (4 + 5 α1 - 2 dd2 α1 - 2 dd2 α2 - 2 dd2 α1 α2 - 6 t12^2
          (α1 (-1 + α2) + α2) + t22 (4 + 7 α1 - 2 α2 - 2 α1 α2) + 2 t12
            (α1 (-7 + 2 t22 (-1 + α2) + 2 α2) + 2 (-2 + α2 + t22 α2))) +
        s1 (2 - 2 dd2 α2 + 4 t12 α2 - 2 t22 α2 + α1 (4 + 3 t22 - 6 t12^2 α2 -
          3 t22 α2 - 2 dd2 (1 + α2) + t12 (-6 + 6 α2 + 4 t22 α2)))) +
      p22 (2 - 2 s1^3 (-1 + t12)^2 (-1 + t22) (1 + α1) + dd1 α2 + 2 t12 α2 +
        α1 (dd1 (1 + α2) - (-2 + t12 + t22) (1 + t12 α2)) + s1^2 (6 + 6 α1 + dd1 α1 + dd1
          α2 + dd1 α1 α2 + t12^2 (2 + α1 (3 + 2 t22 (-1 + α2) - 2 α2) + 2 (-1 + t22) α2) +
          t12 (-8 + t22 (4 + α1 (7 - 2 α2) - 2 α2) + 2 α2 + dd1 α2 + α1 (-9 + dd1 +
            2 α2 + dd1 α2)) - t22 (4 + 2 dd1 α2 + α1 (5 + 2 dd1 (1 + α2)))) +
        s1 (t12^2 (α1 - 2 α2 - 3 α1 α2 + 2 t22 α1 α2) + t12 (-4 + (4 + dd1 - 2 t22) α2 +
          α1 (-6 + dd1 + 3 t22 + 4 α2 + dd1 α2 - 3 t22 α2)) - 2 (-3 - dd1 α2 -
          α1 (3 + dd1 + dd1 α2) + t22 (1 + dd1 α2 + α1 (2 + dd1 + dd1 α2)))) +
      m1^2 (-dd1^2 s1 (1 + s1) (α1 + α2 + α1 α2) + p22^2 (1 + s1) (-1 + s1 (-1 + t22))
        (t12 - t22) (α1 + α2 + α1 α2) -
        dd2 (-4 s1^3 (-1 + t12) (t12 - t22) (1 + α1) + (-t12 + t22) α1 α2 +

```

$$\begin{aligned}
& s1 \left( dd2 \left( \alpha1 + \alpha2 + \alpha1 \alpha2 \right) + \left( t12 - t22 \right) \left( -2 \alpha2 + \alpha1 \left( 3 - 3 \alpha2 + 4 t12 \alpha2 \right) \right) \right) + s1^2 \\
& \left( 4 t12^2 \left( \alpha1 \left( -1 + \alpha2 \right) + \alpha2 \right) + dd2 \left( \alpha1 + \alpha2 + \alpha1 \alpha2 \right) + t22 \left( -4 - 7 \alpha1 + 2 \alpha2 + 2 \alpha1 \right. \right. \\
& \quad \left. \left. \alpha2 \right) + t12 \left( \alpha1 \left( 7 + 4 t22 - 2 \alpha2 - 4 t22 \alpha2 \right) - 2 \left( -2 + \alpha2 + 2 t22 \alpha2 \right) \right) \right) + \\
& dd1 \left( -2 s1^3 \left( 3 t12^2 + t22 \left( 2 + t22 \right) - 2 t12 \left( 1 + 2 t22 \right) \right) \left( 1 + \alpha1 \right) + \right. \\
& \quad \left( -t12 + t22 \right) \alpha1 \alpha2 + s1 \left( 2 dd2 \left( \alpha1 + \alpha2 + \alpha1 \alpha2 \right) + \left( t12 - t22 \right) \right. \\
& \quad \left. \left( -2 \alpha2 + \alpha1 \left( 3 + \left( -3 + 6 t12 - 2 t22 \right) \alpha2 \right) \right) \right) + \\
& s1^2 \left( 6 t12^2 \left( \alpha1 \left( -1 + \alpha2 \right) + \alpha2 \right) + 2 t22^2 \left( \alpha1 \left( -1 + \alpha2 \right) + \alpha2 \right) + 2 dd2 \right. \\
& \quad \left( \alpha1 + \alpha2 + \alpha1 \alpha2 \right) + t22 \left( -4 - 7 \alpha1 + 2 \alpha2 + 2 \alpha1 \alpha2 \right) + t12 \\
& \quad \left( \alpha1 \left( 7 + 8 t22 - 2 \alpha2 - 8 t22 \alpha2 \right) - 2 \left( -2 + \alpha2 + 4 t22 \alpha2 \right) \right) \right) + \\
& p22 \left( -dd1 \alpha1 + dd2 \alpha1 + t12 \alpha1 - t22 \alpha1 + 4 s1^3 \left( -1 + t12 \right) \left( t12 - t22 \right) \right. \\
& \quad \left( -1 + t22 \right) \left( 1 + \alpha1 \right) - dd1 \alpha2 + dd2 \alpha2 - 2 t12 \alpha2 + 2 t22 \alpha2 - dd1 \alpha1 \alpha2 + \\
& \quad dd2 \alpha1 \alpha2 - 2 t12 \alpha1 \alpha2 + 2 t12^2 \alpha1 \alpha2 + 2 t22 \alpha1 \alpha2 - t12 t22 \alpha1 \alpha2 - \\
& \quad t22^2 \alpha1 \alpha2 + s1^2 \left( t22^2 \left( 4 + \alpha1 \left( 7 - 2 \alpha2 \right) - 2 \alpha2 \right) - \left( dd1 - dd2 \right) \left( \alpha1 + \alpha2 + \alpha1 \alpha2 \right) + \right. \\
& \quad t12^2 \left( -4 - 4 \left( -1 + t22 \right) \alpha2 + \alpha1 \left( -6 - 4 t22 \left( -1 + \alpha2 \right) + 4 \alpha2 \right) \right) + t12 \\
& \quad \left( 8 + \left( -2 - 2 dd1 + dd2 - 2 t22 + 4 t22^2 \right) \alpha2 + \alpha1 \left( 9 + dd2 - t22 - 4 t22^2 - 2 \alpha2 + \right. \right. \\
& \quad \left. \left. dd2 \alpha2 - 2 t22 \alpha2 + 4 t22^2 \alpha2 - 2 dd1 \left( 1 + \alpha2 \right) \right) \right) + t22 \left( -8 + 2 \alpha2 + \right. \\
& \quad \left. 3 dd1 \alpha2 - 2 dd2 \alpha2 + \alpha1 \left( -9 + 2 \alpha2 + 3 dd1 \left( 1 + \alpha2 \right) - 2 dd2 \left( 1 + \alpha2 \right) \right) \right) + \\
& s1 \left( t22^2 \left( -3 \alpha1 \left( -1 + \alpha2 \right) - 2 \alpha2 \right) - 2 \left( dd1 - dd2 \right) \left( \alpha1 + \alpha2 + \alpha1 \alpha2 \right) - 2 \right. \\
& \quad t12^2 \left( \alpha1 - 2 \alpha2 - 3 \alpha1 \alpha2 + 2 t22 \alpha1 \alpha2 \right) + t12 \\
& \quad \left( 4 + \left( -4 - 2 dd1 + dd2 - 2 t22 \right) \alpha2 + \alpha1 \left( 6 + dd2 - t22 - 4 \alpha2 + dd2 \alpha2 - \right. \right. \\
& \quad \left. \left. 3 t22 \alpha2 + 4 t22^2 \alpha2 - 2 dd1 \left( 1 + \alpha2 \right) \right) \right) + t22 \left( -4 + \left( 4 + 3 dd1 - 2 dd2 \right) \right. \\
& \quad \left. \alpha2 + \alpha1 \left( 3 dd1 \left( 1 + \alpha2 \right) - 2 \left( 3 + dd2 - 2 \alpha2 + dd2 \alpha2 \right) \right) \right) \right) + \\
& \left( -1 + m1 \right) p12 \left( -2 - 2 \alpha1 - dd1 \alpha1 + dd1 m1 \alpha1 - dd2 m1 \alpha1 + 2 t12 \alpha1 - \right. \\
& \quad m1 t12 \alpha1 + m1 p22 t12 \alpha1 - 2 m1^2 p22 t12 \alpha1 + \\
& \quad m1 t22 \alpha1 - m1 p22 t22 \alpha1 + 2 m1^2 p22 t22 \alpha1 + \\
& \quad 2 s1^3 \left( -1 + t12 \right) \left( -1 + t12 - m1 t12 + m1 t22 \right)^2 \left( 1 + \alpha1 \right) - \\
& \quad dd1 \alpha2 + dd1 m1 \alpha2 - dd2 m1 \alpha2 - 2 t12 \alpha2 + 2 m1 t12 \alpha2 + \\
& \quad m1 p22 t12 \alpha2 - 2 m1^2 p22 t12 \alpha2 - 2 m1 t22 \alpha2 - m1 p22 t22 \alpha2 + \\
& \quad 2 m1^2 p22 t22 \alpha2 - dd1 \alpha1 \alpha2 + dd1 m1 \alpha1 \alpha2 - dd2 m1 \alpha1 \alpha2 - \\
& \quad 2 t12 \alpha1 \alpha2 + 2 m1 t12 \alpha1 \alpha2 + m1 p22 t12 \alpha1 \alpha2 - \\
& \quad 2 m1^2 p22 t12 \alpha1 \alpha2 + 2 t12^2 \alpha1 \alpha2 - 3 m1 t12^2 \alpha1 \alpha2 + m1^2 t12^2 \alpha1 \alpha2 - \\
& \quad 2 m1 t22 \alpha1 \alpha2 - m1 p22 t22 \alpha1 \alpha2 + 2 m1^2 p22 t22 \alpha1 \alpha2 + \\
& \quad 3 m1 t12 t22 \alpha1 \alpha2 - 2 m1^2 t12 t22 \alpha1 \alpha2 + m1^2 t22^2 \alpha1 \alpha2 + \\
& \quad s1 \left( -2 \left( -1 + m1 \right)^2 t12^3 \alpha1 \alpha2 - 2 \left( 3 + dd1 \alpha2 + \alpha1 \left( 3 + dd1 + dd1 \alpha2 \right) \right) - m1^2 t22 \right. \\
& \quad \left( -4 p22 \alpha1 + t22 \alpha1 + p22 t22 \alpha1 - 4 p22 \alpha2 - 2 t22 \alpha2 + p22 t22 \alpha2 - 4 p22 \alpha1 \alpha2 - \right. \\
& \quad \left. 3 t22 \alpha1 \alpha2 + p22 t22 \alpha1 \alpha2 - dd1 \left( \alpha1 + \alpha2 + \alpha1 \alpha2 \right) + dd2 \left( \alpha1 + \alpha2 + \alpha1 \alpha2 \right) \right) - \\
& \quad m1 \left( -2 \left( dd1 - dd2 \right) \left( \alpha1 + \alpha2 + \alpha1 \alpha2 \right) + t22 \left( -4 + \left( 4 + dd1 + 2 p22 \right) \alpha2 + \alpha1 \right. \right. \\
& \quad \left. \left( -6 + dd1 + 2 p22 + 4 \alpha2 + dd1 \alpha2 + 2 p22 \alpha2 \right) \right) + \left( -1 + m1 \right) t12^2 \left( \left( -4 + m1 \right. \right. \\
& \quad \left. \left( 2 + p22 \right) \right) \alpha2 + \alpha1 \left( 4 - 6 \alpha2 + m1 \left( -1 + p22 + 3 \alpha2 + p22 \alpha2 + 4 t22 \alpha2 \right) \right) \right) + \\
& \quad t12 \left( 6 + 10 \alpha1 + dd1 \alpha1 - 4 \alpha2 + dd1 \alpha2 - 4 \alpha1 \alpha2 + dd1 \alpha1 \alpha2 - m1^2 \right. \\
& \quad \left( 4 p22 \alpha1 - 2 t22 \alpha1 + 4 p22 \alpha2 + 4 t22 \alpha2 + 4 p22 \alpha1 \alpha2 + 6 t22 \alpha1 \alpha2 + \right. \\
& \quad \left. 2 t22^2 \alpha1 \alpha2 + dd1 \left( \alpha1 + \alpha2 + \alpha1 \alpha2 \right) - dd2 \left( \alpha1 + \alpha2 + \alpha1 \alpha2 \right) \right) + m1 \\
& \quad \left( -4 + 4 \alpha2 + dd2 \alpha2 + 2 p22 \alpha2 + 6 t22 \alpha2 + p22 t22 \alpha2 + \alpha1 \right. \\
& \quad \left. \left( -6 - 5 t22 + 4 \alpha2 + 9 t22 \alpha2 + dd2 \left( 1 + \alpha2 \right) + p22 \left( 2 + t22 \right) \left( 1 + \alpha2 \right) \right) \right) \right) - \\
& s1^2 \left( 6 + 6 \alpha1 + dd1 \alpha1 + dd1 \alpha2 + dd1 \alpha1 \alpha2 + 2 \left( -1 + m1 \right)^2 t12^3 \left( \alpha1 \left( -1 + \alpha2 \right) + \alpha2 \right) + \right. \\
& \quad m1^2 t22 \left( - \left( dd1 - dd2 + 2 p22 \right) \left( \alpha1 + \alpha2 + \alpha1 \alpha2 \right) + t22 \left( 2 + \left( -2 + p22 \right) \alpha2 + \right. \right. \\
& \quad \left. \left. \alpha1 \left( 3 + p22 - 2 \alpha2 + p22 \alpha2 \right) \right) \right) + m1 \left( - \left( dd1 - dd2 \right) \left( \alpha1 + \alpha2 + \alpha1 \alpha2 \right) + t22 \right. \\
& \quad \left( -8 + \left( 2 + dd1 + p22 \right) \alpha2 + \alpha1 \left( -9 + dd1 + p22 + 2 \alpha2 + dd1 \alpha2 + p22 \alpha2 \right) \right) \right) - \\
& \quad \left( -1 + m1 \right) t12^2 \left( 6 + 10 \alpha1 - 4 \alpha2 - 4 \alpha1 \alpha2 + m1 \left( -2 + \left( 2 + p22 + 4 t22 \right) \alpha2 + \right. \right. \\
& \quad \left. \left. \alpha1 \left( -3 + p22 - 4 t22 + 2 \alpha2 + p22 \alpha2 + 4 t22 \alpha2 \right) \right) \right) + t12 \left( -12 - 14 \alpha1 - dd1 \right.
\end{aligned}$$

$$\begin{aligned}
& \alpha_1 + 2 \alpha_2 - dd_1 \alpha_2 + 2 \alpha_1 \alpha_2 - dd_1 \alpha_1 \alpha_2 + m_1^2 (2 t_{22}^2 (\alpha_1 (-1 + \alpha_2) + \alpha_2) + \\
& (dd_1 - dd_2 + 2 p_{22}) (\alpha_1 + \alpha_2 + \alpha_1 \alpha_2) + t_{22} (-4 - 6 \alpha_1 + 4 \alpha_2 + 4 \alpha_1 \alpha_2)) - \\
& m_1 (-8 + 2 \alpha_2 + dd_2 \alpha_2 + p_{22} \alpha_2 + \alpha_1 (-9 + dd_2 + p_{22} + 2 \alpha_2 + dd_2 \alpha_2 + p_{22} \alpha_2) + \\
& t_{22} (-8 + (6 + p_{22}) \alpha_2 + \alpha_1 (-13 + p_{22} + 6 \alpha_2 + p_{22} \alpha_2))) / \\
& (2 (1 + s_1 (1 + (-1 + m_1) t_{12} - m_1 t_{22})) (1 + (1 + (-1 + m_1) t_{12} - m_1 t_{22}) \alpha_1 + \\
& s_1 (1 + (-1 + m_1) t_{12} - m_1 t_{22}) (1 + \alpha_1)) \\
& (1 + s_1 (1 + (-1 + m_1) t_{12} - m_1 t_{22}) + m_1 t_{22} \alpha_2 + t_{12} (\alpha_2 - m_1 \alpha_2))) , \\
& - ((((-1 + m_1) t_{12} - m_1 t_{22}) (2 + p_{12} \alpha_2 - m_1 p_{12} \alpha_2 + m_1 p_{22} \alpha_2 + 2 t_{12} \alpha_2 - \\
& 2 m_1 t_{12} \alpha_2 - p_{12} t_{12} \alpha_2 + 2 m_1 p_{12} t_{12} \alpha_2 - m_1^2 p_{12} t_{12} \alpha_2 - \\
& m_1 p_{22} t_{12} \alpha_2 + m_1^2 p_{22} t_{12} \alpha_2 + 2 m_1 t_{22} \alpha_2 - m_1 p_{12} t_{22} \alpha_2 + \\
& m_1^2 p_{12} t_{22} \alpha_2 - m_1^2 p_{22} t_{22} \alpha_2 - (1 + (-1 + m_1) t_{12} - m_1 t_{22}) \alpha_1 \\
& (-1 - t_{12} \alpha_2 + (-1 + m_1) p_{12} (1 + \alpha_2) - m_1 (p_{22} + p_{22} \alpha_2 - t_{12} \alpha_2 + t_{22} \alpha_2)) + \\
& s_1 (1 + (-1 + m_1) t_{12} - m_1 t_{22}) (4 - dd_1 \alpha_2 + dd_1 m_1 \alpha_2 - dd_2 m_1 \alpha_2 + 2 p_{12} \alpha_2 - \\
& 2 m_1 p_{12} \alpha_2 + 2 m_1 p_{22} \alpha_2 + 2 t_{12} \alpha_2 - 2 m_1 t_{12} \alpha_2 - p_{12} t_{12} \alpha_2 + m_1 p_{12} t_{12} \alpha_2 + \\
& 2 m_1 t_{22} \alpha_2 - m_1 p_{22} t_{22} \alpha_2 + \alpha_1 (2 + 2 p_{12} - 2 m_1 p_{12} + 2 m_1 p_{22} - t_{12} + m_1 t_{12} - \\
& p_{12} t_{12} + m_1 p_{12} t_{12} - m_1 t_{22} - m_1 p_{22} t_{22} + 2 p_{12} \alpha_2 - 2 m_1 p_{12} \alpha_2 + \\
& 2 m_1 p_{22} \alpha_2 + t_{12} \alpha_2 - m_1 t_{12} \alpha_2 - p_{12} t_{12} \alpha_2 + m_1 p_{12} t_{12} \alpha_2 + \\
& m_1 t_{22} \alpha_2 - m_1 p_{22} t_{22} \alpha_2 + dd_1 (-1 + m_1) (1 + \alpha_2) - dd_2 m_1 (1 + \alpha_2))) + \\
& s_1^2 (1 + (-1 + m_1) t_{12} - m_1 t_{22}) (2 + \alpha_1 - dd_1 \alpha_1 + p_{12} \alpha_1 - dd_1 \alpha_2 + p_{12} \alpha_2 - \\
& dd_1 \alpha_1 \alpha_2 + p_{12} \alpha_1 \alpha_2 + (-1 + m_1) t_{12} (2 + p_{12} \alpha_2 + \alpha_1 (1 + p_{12} + p_{12} \alpha_2)) - \\
& m_1 (- (dd_1 - dd_2 - p_{12} + p_{22}) (\alpha_1 + \alpha_2 + \alpha_1 \alpha_2) + \\
& t_{22} (2 + p_{22} \alpha_2 + \alpha_1 (1 + p_{22} + p_{22} \alpha_2)))) / \\
& (2 (1 + s_1 (1 + (-1 + m_1) t_{12} - m_1 t_{22})) (1 + (1 + (-1 + m_1) t_{12} - m_1 t_{22}) \alpha_1 + \\
& s_1 (1 + (-1 + m_1) t_{12} - m_1 t_{22}) (1 + \alpha_1)) \\
& (1 + s_1 (1 + (-1 + m_1) t_{12} - m_1 t_{22}) + m_1 t_{22} \alpha_2 + t_{12} (\alpha_2 - m_1 \alpha_2))) , \\
& - (((1 + s_1) (-1 + s_1 ((-1 + m_1) (dd_1 + (1 - p_{12}) (1 - t_{12}))) + (-1 + m_1) \\
& (-dd_1 + p_{12} (1 - t_{12}))) - m_1 ((1 - p_{22}) (1 - t_{22}) + p_{22} (1 - t_{22})))^2 \\
& (- ((r ((-1 + m_1) (dd_1 + (1 - p_{12}) (1 - t_{12}))) - m_1 (dd_2 + (1 - p_{22}) (1 - t_{22}))) \\
& ((-1 + m_1) (dd_1 + p_{12} t_{12}) - m_1 (dd_2 + p_{22} t_{22}))) / (-dd_1 - m_1 (-dd_1 + p_{12} \\
& (1 - t_{12})) + s_1 (-dd_1 + p_{12} (1 - t_{12})) - m_1 s_1 (-dd_1 + p_{12} (1 - t_{12})) + \\
& p_{12} (1 - t_{12}) + (1 - p_{12}) t_{12} + p_{12} t_{12} - m_1 (-dd_1 + (1 - p_{12}) t_{12}) - \\
& m_1 (dd_1 + p_{12} t_{12}) + m_1 (dd_2 + (1 - p_{22}) (1 - t_{22})) + \\
& m_1 s_1 (dd_2 + (1 - p_{22}) (1 - t_{22})) + m_1 (-dd_2 + p_{22} (1 - t_{22})) + m_1 s_1 \\
& (-dd_2 + p_{22} (1 - t_{22})) + m_1 (-dd_2 + (1 - p_{22}) t_{22}) + m_1 (dd_2 + p_{22} t_{22}) + \\
& (-dd_1 + p_{12} (1 - t_{12})) \alpha_1 - m_1 (-dd_1 + p_{12} (1 - t_{12})) \alpha_1 + \\
& s_1 (-dd_1 + p_{12} (1 - t_{12})) \alpha_1 - m_1 s_1 (-dd_1 + p_{12} (1 - t_{12})) \alpha_1 + \\
& m_1 (dd_2 + (1 - p_{22}) (1 - t_{22})) \alpha_1 + m_1 s_1 (dd_2 + (1 - p_{22}) (1 - t_{22})) \alpha_1 + \\
& m_1 (-dd_2 + p_{22} (1 - t_{22})) \alpha_1 + m_1 s_1 (-dd_2 + p_{22} (1 - t_{22})) \alpha_1 - \\
& (-1 + m_1) (1 + s_1) (dd_1 + (1 - p_{12}) (1 - t_{12})) (1 + \alpha_1)) - \\
& ((1 + s_1) ((-1 + m_1) (dd_1 + (1 - p_{12}) (1 - t_{12})) - m_1 (dd_2 + (1 - p_{22}) (1 - t_{22}))) \\
& ((-1 + m_1) (-dd_1 + p_{12} (1 - t_{12})) - m_1 (-dd_2 + p_{22} (1 - t_{22}))) (1 + \alpha_1)) / \\
& (-dd_1 - m_1 (-dd_1 + p_{12} (1 - t_{12})) + s_1 (-dd_1 + p_{12} (1 - t_{12})) - \\
& m_1 s_1 (-dd_1 + p_{12} (1 - t_{12})) + p_{12} (1 - t_{12}) + (1 - p_{12}) t_{12} + p_{12} t_{12} - m_1 \\
& (-dd_1 + (1 - p_{12}) t_{12}) - m_1 (dd_1 + p_{12} t_{12}) + m_1 (dd_2 + (1 - p_{22}) (1 - t_{22})) + \\
& m_1 s_1 (dd_2 + (1 - p_{22}) (1 - t_{22})) + m_1 (-dd_2 + p_{22} (1 - t_{22})) + \\
& m_1 s_1 (-dd_2 + p_{22} (1 - t_{22})) + m_1 (-dd_2 + (1 - p_{22}) t_{22}) + m_1 (dd_2 + p_{22} t_{22}) + \\
& (-dd_1 + p_{12} (1 - t_{12})) \alpha_1 - m_1 (-dd_1 + p_{12} (1 - t_{12})) \alpha_1 + \\
& s_1 (-dd_1 + p_{12} (1 - t_{12})) \alpha_1 - m_1 s_1 (-dd_1 + p_{12} (1 - t_{12})) \alpha_1 + \\
& m_1 (dd_2 + (1 - p_{22}) (1 - t_{22})) \alpha_1 + m_1 s_1 (dd_2 + (1 - p_{22}) (1 - t_{22})) \alpha_1 + \\
& m_1 (-dd_2 + p_{22} (1 - t_{22})) \alpha_1 + m_1 s_1 (-dd_2 + p_{22} (1 - t_{22})) \alpha_1 -
\end{aligned}$$

$$\begin{aligned}
& (-1 + m1) (1 + s1) (dd1 + (1 - p12) (1 - t12)) (1 + \alpha1)) + \\
& ((-1 + r) ((-1 + m1) (-dd1 + p12 (1 - t12)) - m1 (-dd2 + p22 (1 - t22))) \\
& ((-1 + m1) (-dd1 + (1 - p12) t12) - m1 (-dd2 + (1 - p22) t22)) (1 + \alpha1)) / \\
& (-dd1 - m1 (-dd1 + p12 (1 - t12)) + s1 (-dd1 + p12 (1 - t12)) - \\
& m1 s1 (-dd1 + p12 (1 - t12)) + p12 (1 - t12) + (1 - p12) t12 + p12 t12 - m1 \\
& (-dd1 + (1 - p12) t12) - m1 (dd1 + p12 t12) + m1 (dd2 + (1 - p22) (1 - t22)) + \\
& m1 s1 (dd2 + (1 - p22) (1 - t22)) + m1 (-dd2 + p22 (1 - t22)) + \\
& m1 s1 (-dd2 + p22 (1 - t22)) + m1 (-dd2 + (1 - p22) t22) + m1 (dd2 + p22 t22) + \\
& (-dd1 + p12 (1 - t12)) \alpha1 - m1 (-dd1 + p12 (1 - t12)) \alpha1 + \\
& s1 (-dd1 + p12 (1 - t12)) \alpha1 - m1 s1 (-dd1 + p12 (1 - t12)) \alpha1 + \\
& m1 (dd2 + (1 - p22) (1 - t22)) \alpha1 + m1 s1 (dd2 + (1 - p22) (1 - t22)) \alpha1 + \\
& m1 (-dd2 + p22 (1 - t22)) \alpha1 + m1 s1 (-dd2 + p22 (1 - t22)) \alpha1 - \\
& (-1 + m1) (1 + s1) (dd1 + (1 - p12) (1 - t12)) (1 + \alpha1)) - \\
& ((1 + s1) ((-1 + m1) (dd1 + (1 - p12) (1 - t12)) - m1 (dd2 + (1 - p22) (1 - t22))) \\
& ((-1 + m1) (-dd1 + p12 (1 - t12)) - m1 (-dd2 + p22 (1 - t22)))) / \\
& (-(-1 + m1) (1 + s1) (dd1 + (1 - p12) (1 - t12)) - m1 (-dd1 + p12 (1 - t12)) + \\
& s1 (-dd1 + p12 (1 - t12)) - m1 s1 (-dd1 + p12 (1 - t12)) + p12 (1 - t12) + \\
& p12 t12 - m1 (dd1 + p12 t12) + m1 (dd2 + (1 - p22) (1 - t22)) + \\
& m1 s1 (dd2 + (1 - p22) (1 - t22)) + m1 (-dd2 + p22 (1 - t22)) + \\
& m1 s1 (-dd2 + p22 (1 - t22)) + m1 (-dd2 + (1 - p22) t22) + m1 (dd2 + p22 t22) + \\
& (dd1 + p12 t12) \alpha2 - m1 (dd1 + p12 t12) \alpha2 + m1 (-dd2 + (1 - p22) t22) \alpha2 + \\
& m1 (dd2 + p22 t22) \alpha2 - (-1 + m1) (-dd1 + (1 - p12) t12) (1 + \alpha2)) - \\
& (2 (1 + s1) ((-1 + m1) (-dd1 + p12 (1 - t12)) - m1 (-dd2 + p22 (1 - t22)))^2) / \\
& (-(-1 + m1) (1 + s1) (dd1 + (1 - p12) (1 - t12)) - m1 (-dd1 + p12 (1 - t12)) + \\
& s1 (-dd1 + p12 (1 - t12)) - m1 s1 (-dd1 + p12 (1 - t12)) + p12 (1 - t12) + \\
& p12 t12 - m1 (dd1 + p12 t12) + m1 (dd2 + (1 - p22) (1 - t22)) + \\
& m1 s1 (dd2 + (1 - p22) (1 - t22)) + m1 (-dd2 + p22 (1 - t22)) + \\
& m1 s1 (-dd2 + p22 (1 - t22)) + m1 (-dd2 + (1 - p22) t22) + m1 (dd2 + p22 t22) + \\
& (dd1 + p12 t12) \alpha2 - m1 (dd1 + p12 t12) \alpha2 + m1 (-dd2 + (1 - p22) t22) \alpha2 + \\
& m1 (dd2 + p22 t22) \alpha2 - (-1 + m1) (-dd1 + (1 - p12) t12) (1 + \alpha2)) - \\
& (r ((-1 + m1) (dd1 + (1 - p12) (1 - t12)) - m1 (dd2 + (1 - p22) (1 - t22))) \\
& ((-1 + m1) (dd1 + p12 t12) - m1 (dd2 + p22 t22))) / \\
& (-(-1 + m1) (1 + s1) (dd1 + (1 - p12) (1 - t12)) - m1 (-dd1 + p12 (1 - t12)) + \\
& s1 (-dd1 + p12 (1 - t12)) - m1 s1 (-dd1 + p12 (1 - t12)) + p12 (1 - t12) + \\
& p12 t12 - m1 (dd1 + p12 t12) + m1 (dd2 + (1 - p22) (1 - t22)) + \\
& m1 s1 (dd2 + (1 - p22) (1 - t22)) + m1 (-dd2 + p22 (1 - t22)) + \\
& m1 s1 (-dd2 + p22 (1 - t22)) + m1 (-dd2 + (1 - p22) t22) + m1 (dd2 + p22 t22) + \\
& (dd1 + p12 t12) \alpha2 - m1 (dd1 + p12 t12) \alpha2 + m1 (-dd2 + (1 - p22) t22) \alpha2 + \\
& m1 (dd2 + p22 t22) \alpha2 - (-1 + m1) (-dd1 + (1 - p12) t12) (1 + \alpha2)) - \\
& (((-1 + m1) (-dd1 + p12 (1 - t12)) - m1 (-dd2 + p22 (1 - t22))) \\
& ((-1 + m1) (dd1 + p12 t12) - m1 (dd2 + p22 t22))) / \\
& (-(-1 + m1) (1 + s1) (dd1 + (1 - p12) (1 - t12)) - m1 (-dd1 + p12 (1 - t12)) + \\
& s1 (-dd1 + p12 (1 - t12)) - m1 s1 (-dd1 + p12 (1 - t12)) + p12 (1 - t12) + \\
& p12 t12 - m1 (dd1 + p12 t12) + m1 (dd2 + (1 - p22) (1 - t22)) + \\
& m1 s1 (dd2 + (1 - p22) (1 - t22)) + m1 (-dd2 + p22 (1 - t22)) + \\
& m1 s1 (-dd2 + p22 (1 - t22)) + m1 (-dd2 + (1 - p22) t22) + m1 (dd2 + p22 t22) + \\
& (dd1 + p12 t12) \alpha2 - m1 (dd1 + p12 t12) \alpha2 + m1 (-dd2 + (1 - p22) t22) \alpha2 + \\
& m1 (dd2 + p22 t22) \alpha2 - (-1 + m1) (-dd1 + (1 - p12) t12) (1 + \alpha2)) + \\
& ((-1 + r) ((-1 + m1) (-dd1 + p12 (1 - t12)) - m1 (-dd2 + p22 (1 - t22))) \\
& ((-1 + m1) (-dd1 + (1 - p12) t12) - m1 (-dd2 + (1 - p22) t22)) (1 + \alpha2)) /
\end{aligned}$$



$$\begin{aligned}
& \left( -(-1+m1)(1+s1)(dd1+(1-p12)(1-t12)) - m1(-dd1+p12(1-t12)) + \right. \\
& \quad s1(-dd1+p12(1-t12)) - m1s1(-dd1+p12(1-t12)) + p12(1-t12) + \\
& \quad p12t12 - m1(dd1+p12t12) + m1(dd2+(1-p22)(1-t22)) + \\
& \quad m1s1(dd2+(1-p22)(1-t22)) + m1(-dd2+p22(1-t22)) + \\
& \quad m1s1(-dd2+p22(1-t22)) + m1(-dd2+(1-p22)t22) + m1(dd2+p22t22) + \\
& \quad (dd1+p12t12)\alpha2 - m1(dd1+p12t12)\alpha2 + m1(-dd2+(1-p22)t22)\alpha2 + \\
& \quad m1(dd2+p22t22)\alpha2 - (-1+m1)(-dd1+(1-p12)t12)(1+\alpha2) - \\
& \quad \left. \left( (-1+m1)(-dd1+p12(1-t12)) - m1(-dd2+p22(1-t22)) \right) \right) \\
& \quad \left( (-1+m1)(dd1+p12t12) - m1(dd2+p22t22) \right) (1+\alpha2) / \\
& \left( -(-1+m1)(1+s1)(dd1+(1-p12)(1-t12)) - m1(-dd1+p12(1-t12)) + \right. \\
& \quad s1(-dd1+p12(1-t12)) - m1s1(-dd1+p12(1-t12)) + p12(1-t12) + \\
& \quad p12t12 - m1(dd1+p12t12) + m1(dd2+(1-p22)(1-t22)) + \\
& \quad m1s1(dd2+(1-p22)(1-t22)) + m1(-dd2+p22(1-t22)) + \\
& \quad m1s1(-dd2+p22(1-t22)) + m1(-dd2+(1-p22)t22) + m1(dd2+p22t22) + \\
& \quad (dd1+p12t12)\alpha2 - m1(dd1+p12t12)\alpha2 + m1(-dd2+(1-p22)t22)\alpha2 + \\
& \quad \left. m1(dd2+p22t22)\alpha2 - (-1+m1)(-dd1+(1-p12)t12)(1+\alpha2) \right) \\
& \left( - \left( (1+s1) \left( (-1+m1)(dd1+(1-p12)(1-t12)) - m1(dd2+ \right. \right. \right. \\
& \quad \left. \left. (1-p22)(1-t22)) \right) \left( (-1+m1)(-dd1+(1-p12)t12) - \right. \right. \\
& \quad \left. \left. m1(-dd2+(1-p22)t22) \right) \right) / (-dd1 - m1(-dd1+p12(1-t12)) + \\
& \quad s1(-dd1+p12(1-t12)) - m1s1(-dd1+p12(1-t12)) + p12(1-t12) + \\
& \quad (1-p12)t12 + p12t12 - m1(-dd1+(1-p12)t12) - m1(dd1+p12t12) + \\
& \quad m1(dd2+(1-p22)(1-t22)) + m1s1(dd2+(1-p22)(1-t22)) + \\
& \quad m1(-dd2+p22(1-t22)) + m1s1(-dd2+p22(1-t22)) + \\
& \quad m1(-dd2+(1-p22)t22) + m1(dd2+p22t22) + \\
& \quad (-dd1+p12(1-t12))\alpha1 - m1(-dd1+p12(1-t12))\alpha1 + \\
& \quad s1(-dd1+p12(1-t12))\alpha1 - m1s1(-dd1+p12(1-t12))\alpha1 + \\
& \quad m1(dd2+(1-p22)(1-t22))\alpha1 + m1s1(dd2+(1-p22)(1-t22))\alpha1 + \\
& \quad m1(-dd2+p22(1-t22))\alpha1 + m1s1(-dd2+p22(1-t22))\alpha1 - \\
& \quad \left. (-1+m1)(1+s1)(dd1+(1-p12)(1-t12))(1+\alpha1) \right) - \\
& \left( 2 \left( (-1+m1)(-dd1+(1-p12)t12) - m1(-dd2+(1-p22)t22) \right)^2 \right) / \\
& \left( -dd1 - m1(-dd1+p12(1-t12)) + s1(-dd1+p12(1-t12)) - \right. \\
& \quad m1s1(-dd1+p12(1-t12)) + p12(1-t12) + (1-p12)t12 + p12t12 - m1 \\
& \quad (-dd1+(1-p12)t12) - m1(dd1+p12t12) + m1(dd2+(1-p22)(1-t22)) + \\
& \quad m1s1(dd2+(1-p22)(1-t22)) + m1(-dd2+p22(1-t22)) + \\
& \quad m1s1(-dd2+p22(1-t22)) + m1(-dd2+(1-p22)t22) + m1(dd2+p22t22) + \\
& \quad (-dd1+p12(1-t12))\alpha1 - m1(-dd1+p12(1-t12))\alpha1 + \\
& \quad s1(-dd1+p12(1-t12))\alpha1 - m1s1(-dd1+p12(1-t12))\alpha1 + \\
& \quad m1(dd2+(1-p22)(1-t22))\alpha1 + m1s1(dd2+(1-p22)(1-t22))\alpha1 + \\
& \quad m1(-dd2+p22(1-t22))\alpha1 + m1s1(-dd2+p22(1-t22))\alpha1 - \\
& \quad \left. (-1+m1)(1+s1)(dd1+(1-p12)(1-t12))(1+\alpha1) \right) - \\
& \left( r(1+s1) \left( (-1+m1)(dd1+(1-p12)(1-t12)) - m1(dd2+(1-p22) \right. \right. \\
& \quad \left. \left. (1-t22)) \right) \left( (-1+m1)(dd1+p12t12) - m1(dd2+p22t22) \right) \right) / \\
& \left( -dd1 - m1(-dd1+p12(1-t12)) + s1(-dd1+p12(1-t12)) - \right. \\
& \quad m1s1(-dd1+p12(1-t12)) + p12(1-t12) + (1-p12)t12 + p12t12 - m1 \\
& \quad (-dd1+(1-p12)t12) - m1(dd1+p12t12) + m1(dd2+(1-p22)(1-t22)) + \\
& \quad m1s1(dd2+(1-p22)(1-t22)) + m1(-dd2+p22(1-t22)) + \\
& \quad m1s1(-dd2+p22(1-t22)) + m1(-dd2+(1-p22)t22) + m1(dd2+p22t22) + \\
& \quad (-dd1+p12(1-t12))\alpha1 - m1(-dd1+p12(1-t12))\alpha1 + \\
& \quad \left. s1(-dd1+p12(1-t12))\alpha1 - m1s1(-dd1+p12(1-t12))\alpha1 + \right.
\end{aligned}$$

$$\begin{aligned}
& m1 (dd2 + (1 - p22) (1 - t22)) \alpha1 + m1 s1 (dd2 + (1 - p22) (1 - t22)) \alpha1 + \\
& m1 (-dd2 + p22 (1 - t22)) \alpha1 + m1 s1 (-dd2 + p22 (1 - t22)) \alpha1 - \\
& (-1 + m1) (1 + s1) (dd1 + (1 - p12) (1 - t12)) (1 + \alpha1) - \\
& ((-1 + m1) (-dd1 + (1 - p12) t12) - m1 (-dd2 + (1 - p22) t22)) \\
& ((-1 + m1) (dd1 + p12 t12) - m1 (dd2 + p22 t22))) / \\
& (-dd1 - m1 (-dd1 + p12 (1 - t12)) + s1 (-dd1 + p12 (1 - t12)) - \\
& m1 s1 (-dd1 + p12 (1 - t12)) + p12 (1 - t12) + (1 - p12) t12 + p12 t12 - m1 \\
& (-dd1 + (1 - p12) t12) - m1 (dd1 + p12 t12) + m1 (dd2 + (1 - p22) (1 - t22)) + \\
& m1 s1 (dd2 + (1 - p22) (1 - t22)) + m1 (-dd2 + p22 (1 - t22)) + \\
& m1 s1 (-dd2 + p22 (1 - t22)) + m1 (-dd2 + (1 - p22) t22) + m1 (dd2 + p22 t22) + \\
& (-dd1 + p12 (1 - t12)) \alpha1 - m1 (-dd1 + p12 (1 - t12)) \alpha1 + \\
& s1 (-dd1 + p12 (1 - t12)) \alpha1 - m1 s1 (-dd1 + p12 (1 - t12)) \alpha1 + \\
& m1 (dd2 + (1 - p22) (1 - t22)) \alpha1 + m1 s1 (dd2 + (1 - p22) (1 - t22)) \alpha1 + \\
& m1 (-dd2 + p22 (1 - t22)) \alpha1 + m1 s1 (-dd2 + p22 (1 - t22)) \alpha1 - \\
& (-1 + m1) (1 + s1) (dd1 + (1 - p12) (1 - t12)) (1 + \alpha1) - \\
& ((1 + s1) ((-1 + m1) (dd1 + (1 - p12) (1 - t12)) - m1 (dd2 + (1 - p22) (1 - t22))) \\
& ((-1 + m1) (-dd1 + (1 - p12) t12) - m1 (-dd2 + (1 - p22) t22)) (1 + \alpha1)) / \\
& (-dd1 - m1 (-dd1 + p12 (1 - t12)) + s1 (-dd1 + p12 (1 - t12)) - \\
& m1 s1 (-dd1 + p12 (1 - t12)) + p12 (1 - t12) + (1 - p12) t12 + p12 t12 - m1 \\
& (-dd1 + (1 - p12) t12) - m1 (dd1 + p12 t12) + m1 (dd2 + (1 - p22) (1 - t22)) + \\
& m1 s1 (dd2 + (1 - p22) (1 - t22)) + m1 (-dd2 + p22 (1 - t22)) + \\
& m1 s1 (-dd2 + p22 (1 - t22)) + m1 (-dd2 + (1 - p22) t22) + m1 (dd2 + p22 t22) + \\
& (-dd1 + p12 (1 - t12)) \alpha1 - m1 (-dd1 + p12 (1 - t12)) \alpha1 + \\
& s1 (-dd1 + p12 (1 - t12)) \alpha1 - m1 s1 (-dd1 + p12 (1 - t12)) \alpha1 + \\
& m1 (dd2 + (1 - p22) (1 - t22)) \alpha1 + m1 s1 (dd2 + (1 - p22) (1 - t22)) \alpha1 + \\
& m1 (-dd2 + p22 (1 - t22)) \alpha1 + m1 s1 (-dd2 + p22 (1 - t22)) \alpha1 - \\
& (-1 + m1) (1 + s1) (dd1 + (1 - p12) (1 - t12)) (1 + \alpha1) + \\
& ((-1 + r) (1 + s1) ((-1 + m1) (-dd1 + p12 (1 - t12)) - m1 (-dd2 + p22 (1 - t22))) \\
& ((-1 + m1) (-dd1 + (1 - p12) t12) - m1 (-dd2 + (1 - p22) t22)) (1 + \alpha1)) / \\
& (-dd1 - m1 (-dd1 + p12 (1 - t12)) + s1 (-dd1 + p12 (1 - t12)) - \\
& m1 s1 (-dd1 + p12 (1 - t12)) + p12 (1 - t12) + (1 - p12) t12 + p12 t12 - m1 \\
& (-dd1 + (1 - p12) t12) - m1 (dd1 + p12 t12) + m1 (dd2 + (1 - p22) (1 - t22)) + \\
& m1 s1 (dd2 + (1 - p22) (1 - t22)) + m1 (-dd2 + p22 (1 - t22)) + \\
& m1 s1 (-dd2 + p22 (1 - t22)) + m1 (-dd2 + (1 - p22) t22) + m1 (dd2 + p22 t22) + \\
& (-dd1 + p12 (1 - t12)) \alpha1 - m1 (-dd1 + p12 (1 - t12)) \alpha1 + \\
& s1 (-dd1 + p12 (1 - t12)) \alpha1 - m1 s1 (-dd1 + p12 (1 - t12)) \alpha1 + \\
& m1 (dd2 + (1 - p22) (1 - t22)) \alpha1 + m1 s1 (dd2 + (1 - p22) (1 - t22)) \alpha1 + \\
& m1 (-dd2 + p22 (1 - t22)) \alpha1 + m1 s1 (-dd2 + p22 (1 - t22)) \alpha1 - \\
& (-1 + m1) (1 + s1) (dd1 + (1 - p12) (1 - t12)) (1 + \alpha1) - \\
& (r (1 + s1) ((-1 + m1) (dd1 + (1 - p12) (1 - t12)) - m1 (dd2 + (1 - p22) \\
& (1 - t22))) ((-1 + m1) (dd1 + p12 t12) - m1 (dd2 + p22 t22))) / \\
& (-(-1 + m1) (1 + s1) (dd1 + (1 - p12) (1 - t12)) - m1 (-dd1 + p12 (1 - t12)) + \\
& s1 (-dd1 + p12 (1 - t12)) - m1 s1 (-dd1 + p12 (1 - t12)) + p12 (1 - t12) + \\
& p12 t12 - m1 (dd1 + p12 t12) + m1 (dd2 + (1 - p22) (1 - t22)) + \\
& m1 s1 (dd2 + (1 - p22) (1 - t22)) + m1 (-dd2 + p22 (1 - t22)) + \\
& m1 s1 (-dd2 + p22 (1 - t22)) + m1 (-dd2 + (1 - p22) t22) + m1 (dd2 + p22 t22) + \\
& (dd1 + p12 t12) \alpha2 - m1 (dd1 + p12 t12) \alpha2 + m1 (-dd2 + (1 - p22) t22) \alpha2 + \\
& m1 (dd2 + p22 t22) \alpha2 - (-1 + m1) (-dd1 + (1 - p12) t12) (1 + \alpha2) + \\
& ((-1 + r) (1 + s1) ((-1 + m1) (-dd1 + p12 (1 - t12)) - m1 (-dd2 + p22 (1 - t22))) \\
& ((-1 + m1) (-dd1 + (1 - p12) t12) - m1 (-dd2 + (1 - p22) t22)) (1 + \alpha2)) /
\end{aligned}$$

$$\begin{aligned}
& (-(-1+m1)(1+s1)(dd1+(1-p12)(1-t12))-m1(-dd1+p12(1-t12))+ \\
& s1(-dd1+p12(1-t12))-m1s1(-dd1+p12(1-t12))+p12(1-t12)+ \\
& p12t12-m1(dd1+p12t12)+m1(dd2+(1-p22)(1-t22))+ \\
& m1s1(dd2+(1-p22)(1-t22))+m1(-dd2+p22(1-t22))+ \\
& m1s1(-dd2+p22(1-t22))+m1(-dd2+(1-p22)t22)+m1(dd2+p22t22)+ \\
& (dd1+p12t12)\alpha2-m1(dd1+p12t12)\alpha2+m1(-dd2+(1-p22)t22)\alpha2+ \\
& m1(dd2+p22t22)\alpha2-(-1+m1)(-dd1+(1-p12)t12)(1+\alpha2))- \\
& (((-1+m1)(-dd1+(1-p12)t12)-m1(-dd2+(1-p22)t22)) \\
& ((-1+m1)(dd1+p12t12)-m1(dd2+p22t22))(1+\alpha2)))/ \\
& (-(-1+m1)(1+s1)(dd1+(1-p12)(1-t12))-m1(-dd1+p12(1-t12))+ \\
& s1(-dd1+p12(1-t12))-m1s1(-dd1+p12(1-t12))+p12(1-t12)+ \\
& p12t12-m1(dd1+p12t12)+m1(dd2+(1-p22)(1-t22))+ \\
& m1s1(dd2+(1-p22)(1-t22))+m1(-dd2+p22(1-t22))+ \\
& m1s1(-dd2+p22(1-t22))+m1(-dd2+(1-p22)t22)+m1(dd2+p22t22)+ \\
& (dd1+p12t12)\alpha2-m1(dd1+p12t12)\alpha2+m1(-dd2+(1-p22)t22)\alpha2+ \\
& m1(dd2+p22t22)\alpha2-(-1+m1)(-dd1+(1-p12)t12)(1+\alpha2))) / \\
& (4(1+s1(-m1(dd1+(1-p12)(1-t12))-m1(-dd1+p12(1-t12))+ \\
& (1-p12)(1-t12)+p12(1-t12)+ \\
& m1(dd2+(1-p22)(1-t22))+m1(-dd2+p22(1-t22))))^4)+ \\
& ((1+s1)(-1+s1((-1+m1)(dd1+(1-p12)(1-t12))+(-1+m1)(-dd1+ \\
& p12(1-t12))-m1((1-p22)(1-t22)+p22(1-t22))))^2 \\
& (-(((((-1+m1)(dd1+(1-p12)(1-t12))-m1(dd2+(1-p22)(1-t22)))) \\
& ((-1+m1)(-dd1+(1-p12)t12)-m1(-dd2+(1-p22)t22)))) / \\
& (-dd1-m1(-dd1+p12(1-t12))+s1(-dd1+p12(1-t12))- \\
& m1s1(-dd1+p12(1-t12))+p12(1-t12)+(1-p12)t12+p12t12-m1 \\
& (-dd1+(1-p12)t12)-m1(dd1+p12t12)+m1(dd2+(1-p22)(1-t22))+ \\
& m1s1(dd2+(1-p22)(1-t22))+m1(-dd2+p22(1-t22))+ \\
& m1s1(-dd2+p22(1-t22))+m1(-dd2+(1-p22)t22)+m1(dd2+p22t22)+ \\
& (-dd1+p12(1-t12))\alpha1-m1(-dd1+p12(1-t12))\alpha1+ \\
& s1(-dd1+p12(1-t12))\alpha1-m1s1(-dd1+p12(1-t12))\alpha1+ \\
& m1(dd2+(1-p22)(1-t22))\alpha1+m1s1(dd2+(1-p22)(1-t22))\alpha1+ \\
& m1(-dd2+p22(1-t22))\alpha1+m1s1(-dd2+p22(1-t22))\alpha1- \\
& (-1+m1)(1+s1)(dd1+(1-p12)(1-t12))(1+\alpha1))) + \\
& ((-1+r)((-1+m1)(dd1+(1-p12)(1-t12))-m1(dd2+(1-p22)(1-t22))) \\
& ((-1+m1)(dd1+p12t12)-m1(dd2+p22t22))) / \\
& (-dd1-m1(-dd1+p12(1-t12))+s1(-dd1+p12(1-t12))- \\
& m1s1(-dd1+p12(1-t12))+p12(1-t12)+(1-p12)t12+ \\
& p12t12-m1(-dd1+(1-p12)t12)-m1(dd1+p12t12)+ \\
& m1(dd2+(1-p22)(1-t22))+m1s1(dd2+(1-p22)(1-t22))+ \\
& m1(-dd2+p22(1-t22))+m1s1(-dd2+p22(1-t22))+ \\
& m1(-dd2+(1-p22)t22)+m1(dd2+p22t22)+ \\
& (-dd1+p12(1-t12))\alpha1-m1(-dd1+p12(1-t12))\alpha1+ \\
& s1(-dd1+p12(1-t12))\alpha1-m1s1(-dd1+p12(1-t12))\alpha1+ \\
& m1(dd2+(1-p22)(1-t22))\alpha1+m1s1(dd2+(1-p22)(1-t22))\alpha1+ \\
& m1(-dd2+p22(1-t22))\alpha1+m1s1(-dd2+p22(1-t22))\alpha1- \\
& (-1+m1)(1+s1)(dd1+(1-p12)(1-t12))(1+\alpha1))- \\
& (2(1+s1)((-1+m1)(dd1+(1-p12)(1-t12))-m1(dd2+(1-p22)(1-t22)))^2 \\
& (1+\alpha1))/(-dd1-m1(-dd1+p12(1-t12))+s1(-dd1+p12(1-t12))-
\end{aligned}$$



$$\begin{aligned}
& \left( (-1 + m1) (-dd1 + p12 (1 - t12)) - m1 (-dd2 + p22 (1 - t22)) \right) / \\
& \left( -(-1 + m1) (1 + s1) (dd1 + (1 - p12) (1 - t12)) - m1 (-dd1 + p12 (1 - t12)) + \right. \\
& \quad s1 (-dd1 + p12 (1 - t12)) - m1 s1 (-dd1 + p12 (1 - t12)) + p12 (1 - t12) + \\
& \quad p12 t12 - m1 (dd1 + p12 t12) + m1 (dd2 + (1 - p22) (1 - t22)) + \\
& \quad m1 s1 (dd2 + (1 - p22) (1 - t22)) + m1 (-dd2 + p22 (1 - t22)) + \\
& \quad m1 s1 (-dd2 + p22 (1 - t22)) + m1 (-dd2 + (1 - p22) t22) + m1 (dd2 + p22 t22) + \\
& \quad (dd1 + p12 t12) \alpha2 - m1 (dd1 + p12 t12) \alpha2 + m1 (-dd2 + (1 - p22) t22) \alpha2 + \\
& \quad m1 (dd2 + p22 t22) \alpha2 - (-1 + m1) (-dd1 + (1 - p12) t12) (1 + \alpha2) \left. \right) + \\
& \left( (-1 + r) \left( (-1 + m1) (dd1 + (1 - p12) (1 - t12)) - m1 (dd2 + (1 - p22) (1 - t22)) \right) \right) \\
& \quad \left( (-1 + m1) (dd1 + p12 t12) - m1 (dd2 + p22 t22) \right) / \\
& \left( -(-1 + m1) (1 + s1) (dd1 + (1 - p12) (1 - t12)) - m1 (-dd1 + p12 (1 - t12)) + \right. \\
& \quad s1 (-dd1 + p12 (1 - t12)) - m1 s1 (-dd1 + p12 (1 - t12)) + p12 (1 - t12) + \\
& \quad p12 t12 - m1 (dd1 + p12 t12) + m1 (dd2 + (1 - p22) (1 - t22)) + \\
& \quad m1 s1 (dd2 + (1 - p22) (1 - t22)) + m1 (-dd2 + p22 (1 - t22)) + \\
& \quad m1 s1 (-dd2 + p22 (1 - t22)) + m1 (-dd2 + (1 - p22) t22) + m1 (dd2 + p22 t22) + \\
& \quad (dd1 + p12 t12) \alpha2 - m1 (dd1 + p12 t12) \alpha2 + m1 (-dd2 + (1 - p22) t22) \alpha2 + \\
& \quad m1 (dd2 + p22 t22) \alpha2 - (-1 + m1) (-dd1 + (1 - p12) t12) (1 + \alpha2) \left. \right) - \\
& \left( r \left( (-1 + m1) (-dd1 + p12 (1 - t12)) - m1 (-dd2 + p22 (1 - t22)) \right) \right) \\
& \quad \left( (-1 + m1) (-dd1 + (1 - p12) t12) - m1 (-dd2 + (1 - p22) t22) \right) (1 + \alpha2) / \\
& \left( -(-1 + m1) (1 + s1) (dd1 + (1 - p12) (1 - t12)) - m1 (-dd1 + p12 (1 - t12)) + \right. \\
& \quad s1 (-dd1 + p12 (1 - t12)) - m1 s1 (-dd1 + p12 (1 - t12)) + p12 (1 - t12) + \\
& \quad p12 t12 - m1 (dd1 + p12 t12) + m1 (dd2 + (1 - p22) (1 - t22)) + \\
& \quad m1 s1 (dd2 + (1 - p22) (1 - t22)) + m1 (-dd2 + p22 (1 - t22)) + \\
& \quad m1 s1 (-dd2 + p22 (1 - t22)) + m1 (-dd2 + (1 - p22) t22) + m1 (dd2 + p22 t22) + \\
& \quad (dd1 + p12 t12) \alpha2 - m1 (dd1 + p12 t12) \alpha2 + m1 (-dd2 + (1 - p22) t22) \alpha2 + \\
& \quad m1 (dd2 + p22 t22) \alpha2 - (-1 + m1) (-dd1 + (1 - p12) t12) (1 + \alpha2) \left. \right) \\
& \left( ((-1 + r) (1 + s1) ((-1 + m1) (dd1 + (1 - p12) (1 - t12)) - m1 (dd2 + \right. \\
& \quad (1 - p22) (1 - t22))) ((-1 + m1) (dd1 + p12 t12) - m1 (dd2 + p22 t22))) / \\
& \left( -dd1 - m1 (-dd1 + p12 (1 - t12)) + s1 (-dd1 + p12 (1 - t12)) - \right. \\
& \quad m1 s1 (-dd1 + p12 (1 - t12)) + p12 (1 - t12) + (1 - p12) t12 + p12 t12 - \\
& \quad m1 (-dd1 + (1 - p12) t12) - m1 (dd1 + p12 t12) + m1 (dd2 + (1 - p22) (1 - t22)) + \\
& \quad m1 s1 (dd2 + (1 - p22) (1 - t22)) + m1 (-dd2 + p22 (1 - t22)) + \\
& \quad m1 s1 (-dd2 + p22 (1 - t22)) + m1 (-dd2 + (1 - p22) t22) + m1 (dd2 + p22 t22) + \\
& \quad (-dd1 + p12 (1 - t12)) \alpha1 - m1 (-dd1 + p12 (1 - t12)) \alpha1 + \\
& \quad s1 (-dd1 + p12 (1 - t12)) \alpha1 - m1 s1 (-dd1 + p12 (1 - t12)) \alpha1 + \\
& \quad m1 (dd2 + (1 - p22) (1 - t22)) \alpha1 + m1 s1 (dd2 + (1 - p22) (1 - t22)) \alpha1 + \\
& \quad m1 (-dd2 + p22 (1 - t22)) \alpha1 + m1 s1 (-dd2 + p22 (1 - t22)) \alpha1 - \\
& \quad (-1 + m1) (1 + s1) (dd1 + (1 - p12) (1 - t12)) (1 + \alpha1) \left. \right) - \\
& \left( ((-1 + m1) (-dd1 + (1 - p12) t12) - m1 (-dd2 + (1 - p22) t22)) \right) \\
& \quad \left( (-1 + m1) (dd1 + p12 t12) - m1 (dd2 + p22 t22) \right) / \\
& \left( -dd1 - m1 (-dd1 + p12 (1 - t12)) + s1 (-dd1 + p12 (1 - t12)) - \right. \\
& \quad m1 s1 (-dd1 + p12 (1 - t12)) + p12 (1 - t12) + (1 - p12) t12 + p12 t12 - \\
& \quad m1 (-dd1 + (1 - p12) t12) - m1 (dd1 + p12 t12) + m1 (dd2 + (1 - p22) (1 - t22)) + \\
& \quad m1 s1 (dd2 + (1 - p22) (1 - t22)) + m1 (-dd2 + p22 (1 - t22)) + \\
& \quad m1 s1 (-dd2 + p22 (1 - t22)) + m1 (-dd2 + (1 - p22) t22) + m1 (dd2 + p22 t22) + \\
& \quad (-dd1 + p12 (1 - t12)) \alpha1 - m1 (-dd1 + p12 (1 - t12)) \alpha1 + \\
& \quad s1 (-dd1 + p12 (1 - t12)) \alpha1 - m1 s1 (-dd1 + p12 (1 - t12)) \alpha1 + \\
& \quad m1 (dd2 + (1 - p22) (1 - t22)) \alpha1 + m1 s1 (dd2 + (1 - p22) (1 - t22)) \alpha1 + \\
& \quad m1 (-dd2 + p22 (1 - t22)) \alpha1 + m1 s1 (-dd2 + p22 (1 - t22)) \alpha1 - \\
& \quad (-1 + m1) (1 + s1) (dd1 + (1 - p12) (1 - t12)) (1 + \alpha1) \left. \right) -
\end{aligned}$$



$$\begin{aligned}
& \left( -(-1+m1)(1+s1)(dd1+(1-p12)(1-t12)) - m1(-dd1+p12(1-t12)) + \right. \\
& \quad s1(-dd1+p12(1-t12)) - m1s1(-dd1+p12(1-t12)) + p12(1-t12) + \\
& \quad p12t12 - m1(dd1+p12t12) + m1(dd2+(1-p22)(1-t22)) + \\
& \quad m1s1(dd2+(1-p22)(1-t22)) + m1(-dd2+p22(1-t22)) + \\
& \quad m1s1(-dd2+p22(1-t22)) + m1(-dd2+(1-p22)t22) + m1(dd2+p22t22) + \\
& \quad (dd1+p12t12)\alpha^2 - m1(dd1+p12t12)\alpha^2 + m1(-dd2+(1-p22)t22)\alpha^2 + \\
& \quad m1(dd2+p22t22)\alpha^2 - (-1+m1)(-dd1+(1-p12)t12)(1+\alpha^2) \left. - \right. \\
& \quad \left. \left( 2((-1+m1)(dd1+p12t12) - m1(dd2+p22t22))^2(1+\alpha^2) \right) \right) / \\
& \left( -(-1+m1)(1+s1)(dd1+(1-p12)(1-t12)) - m1(-dd1+p12(1-t12)) + \right. \\
& \quad s1(-dd1+p12(1-t12)) - m1s1(-dd1+p12(1-t12)) + p12(1-t12) + \\
& \quad p12t12 - m1(dd1+p12t12) + m1(dd2+(1-p22)(1-t22)) + \\
& \quad m1s1(dd2+(1-p22)(1-t22)) + m1(-dd2+p22(1-t22)) + \\
& \quad m1s1(-dd2+p22(1-t22)) + m1(-dd2+(1-p22)t22) + m1(dd2+p22t22) + \\
& \quad (dd1+p12t12)\alpha^2 - m1(dd1+p12t12)\alpha^2 + m1(-dd2+(1-p22)t22)\alpha^2 + \\
& \quad m1(dd2+p22t22)\alpha^2 - (-1+m1)(-dd1+(1-p12)t12)(1+\alpha^2) \left. \right) \Bigg) / \\
& \left( 4(1+s1(-m1(dd1+(1-p12)(1-t12)) - m1(-dd1+p12(1-t12)) + \right. \\
& \quad (1-p12)(1-t12) + p12(1-t12) + \\
& \quad m1(dd2+(1-p22)(1-t22)) + m1(-dd2+p22(1-t22)))^4 \Bigg), \\
& \left( p22(1+s2t22)(2+dd2\alpha^2+2t22\alpha^2+2s2^2t22^2(1+\alpha^2) + \right. \\
& \quad \alpha^1(dd2(1+\alpha^2)-2(-1+t22)(1+t22\alpha^2)) + \\
& \quad s2(-2t22^2(\alpha^1-\alpha^2+\alpha^1\alpha^2)+dd2(\alpha^1+\alpha^2+\alpha^1\alpha^2)+2t22(2+\alpha^1+\alpha^2+\alpha^1\alpha^2)) \Bigg) + \\
& \quad dd2(2s2^3t22^2(1+\alpha^2)-\alpha^1(1+t22\alpha^2) + \\
& \quad s2(2+dd2\alpha^2+2t22\alpha^2+\alpha^1(1+dd2-3t22+dd2\alpha^2-2t22^2\alpha^2)) + \\
& \quad s2^2(-2t22^2(\alpha^1-\alpha^2+\alpha^1\alpha^2)+dd2(\alpha^1+\alpha^2+\alpha^1\alpha^2)+t22(4+\alpha^1+2\alpha^2+\alpha^1\alpha^2)) \Bigg) - \\
& \quad m2^3(t12-t22)(-2(dd1-dd2)s2(t12-t22)(s2-\alpha^1)(s2+\alpha^2+s2\alpha^2) + \\
& \quad p12^2(1+s2)(1+s2t12)(\alpha^1+\alpha^2+\alpha^1\alpha^2) + \\
& \quad p22^2(1+s2)(1+s2t22)(\alpha^1+\alpha^2+\alpha^1\alpha^2) - \\
& \quad p12(2p22\alpha^1+2p22\alpha^2+2p22\alpha^1\alpha^2-t12\alpha^1\alpha^2+t22\alpha^1\alpha^2 + \\
& \quad 2s2^3t12(t12-t22)(1+\alpha^2)+s2(2p22\alpha^1-t12\alpha^1+p22t12\alpha^1+t22 \\
& \quad \alpha^1+p22t22\alpha^1+2p22\alpha^2+2t12\alpha^2+p22t12\alpha^2-2t22\alpha^2+p22t22 \\
& \quad \alpha^2+2p22\alpha^1\alpha^2+p22t12\alpha^1\alpha^2-2t12^2\alpha^1\alpha^2+p22t22\alpha^1\alpha^2+2 \\
& \quad t12t22\alpha^1\alpha^2-dd1(\alpha^1+\alpha^2+\alpha^1\alpha^2)+dd2(\alpha^1+\alpha^2+\alpha^1\alpha^2)) + \\
& \quad s2^2(-2t12^2(\alpha^1-\alpha^2+\alpha^1\alpha^2)-(dd1-dd2)(\alpha^1+\alpha^2+\alpha^1\alpha^2)+t22 \\
& \quad (-2+(-2+p22)\alpha^2+(-1+p22)\alpha^1(1+\alpha^2))+t12 \\
& \quad (2+(2+p22-2t22)\alpha^2+(1+p22+2t22)\alpha^1(1+\alpha^2))) \Bigg) + \\
& \quad p22((-t12+t22)\alpha^1\alpha^2+2s2^3(t12-t22)t22(1+\alpha^2)+s2(-dd1(\alpha^1+\alpha^2+ \\
& \quad \alpha^1\alpha^2)+dd2(\alpha^1+\alpha^2+\alpha^1\alpha^2)-(t12-t22)(\alpha^1-2\alpha^2+2t22\alpha^1\alpha^2)) + \\
& \quad s2^2(-t22(2+\alpha^1)(1+\alpha^2)+2t22^2(\alpha^1-\alpha^2+\alpha^1\alpha^2)-(dd1-dd2)(\alpha^1+ \\
& \quad \alpha^2+\alpha^1\alpha^2)+t12(-(-1+2t22)\alpha^1(1+\alpha^2)+2(1+\alpha^2+t22\alpha^2))) \Bigg) + \\
& \quad m2(2dd1s2-2dd2s2+4dd2s2^2t12+4dd1s2^2t22-8dd2s2^2t22 + \\
& \quad 4dd2s2^3t12t22+2dd1s2^3t22^2 - \\
& \quad 6dd2s2^3t22^2-dd1\alpha^1+dd2\alpha^1 + \\
& \quad dd1s2\alpha^1-dd2s2\alpha^1+2dd1dd2s2\alpha^1 - \\
& \quad 2dd2^2s2\alpha^1+2dd1dd2s2^2\alpha^1 - \\
& \quad 2dd2^2s2^2\alpha^1-3dd2s2t12\alpha^1 + \\
& \quad dd2s2^2t12\alpha^1-3dd1s2t22\alpha^1 + \\
& \quad 6dd2s2t22\alpha^1+dd1s2^2t22\alpha^1 - \\
& \quad 2dd2s2^2t22\alpha^1-4dd2s2^2t12t22\alpha^1 - \\
& \quad 2dd1s2^2t22^2\alpha^1+6dd2s2^2t22^2\alpha^1 + \\
& \quad 2dd1dd2s2\alpha^2-2dd2^2s2\alpha^2 +
\end{aligned}$$

$$\begin{aligned}
& 2 \, dd1 \, dd2 \, s^2 \, \alpha^2 - 2 \, dd2^2 \, s^2 \, \alpha^2 + \\
& 2 \, dd2 \, s^2 \, t_{12} \, \alpha^2 + 2 \, dd2 \, s^2 \, t_{12} \, \alpha^2 + \\
& 2 \, dd1 \, s^2 \, t_{22} \, \alpha^2 - 4 \, dd2 \, s^2 \, t_{22} \, \alpha^2 + \\
& 2 \, dd1 \, s^2 \, t_{22} \, \alpha^2 - 4 \, dd2 \, s^2 \, t_{22} \, \alpha^2 + \\
& 4 \, dd2 \, s^2 \, t_{12} \, t_{22} \, \alpha^2 + 4 \, dd2 \, s^2 \, t_{12} \, t_{22} \, \alpha^2 + \\
& 2 \, dd1 \, s^2 \, t_{22}^2 \, \alpha^2 - 6 \, dd2 \, s^2 \, t_{22}^2 \, \alpha^2 + \\
& 2 \, dd1 \, s^2 \, t_{22}^2 \, \alpha^2 - 6 \, dd2 \, s^2 \, t_{22}^2 \, \alpha^2 + \\
& 2 \, dd1 \, dd2 \, s^2 \, \alpha^1 \, \alpha^2 - 2 \, dd2^2 \, s^2 \, \alpha^1 \, \alpha^2 + \\
& 2 \, dd1 \, dd2 \, s^2 \, \alpha^1 \, \alpha^2 - 2 \, dd2^2 \, s^2 \, \alpha^1 \, \alpha^2 - \\
& dd2 \, t_{12} \, \alpha^1 \, \alpha^2 + dd2 \, s^2 \, t_{12} \, \alpha^1 \, \alpha^2 - \\
& dd1 \, t_{22} \, \alpha^1 \, \alpha^2 + 2 \, dd2 \, t_{22} \, \alpha^1 \, \alpha^2 + \\
& dd1 \, s^2 \, t_{22} \, \alpha^1 \, \alpha^2 - 2 \, dd2 \, s^2 \, t_{22} \, \alpha^1 \, \alpha^2 - \\
& 4 \, dd2 \, s^2 \, t_{12} \, t_{22} \, \alpha^1 \, \alpha^2 - 4 \, dd2 \, s^2 \, t_{12} \, t_{22} \, \alpha^1 \, \alpha^2 - \\
& 2 \, dd1 \, s^2 \, t_{22}^2 \, \alpha^1 \, \alpha^2 + 6 \, dd2 \, s^2 \, t_{22}^2 \, \alpha^1 \, \alpha^2 - \\
& 2 \, dd1 \, s^2 \, t_{22}^2 \, \alpha^1 \, \alpha^2 + 6 \, dd2 \, s^2 \, t_{22}^2 \, \alpha^1 \, \alpha^2 - \\
& p_{22}^2 \, (1 + s^2) \, (t_{12} - t_{22}) \, (1 + s^2 \, t_{22}) \, (\alpha^1 + \alpha^2 + \alpha^1 \, \alpha^2) + \\
& p_{22} \, (-2 - 2 \, \alpha^1 + dd1 \, \alpha^1 - 2 \, dd2 \, \alpha^1 - t_{12} \, \alpha^1 + 3 \, t_{22} \, \alpha^1 + dd1 \, \alpha^2 - 2 \, dd2 \, \alpha^2 + \\
& \quad 2 \, t_{12} \, \alpha^2 - 4 \, t_{22} \, \alpha^2 + dd1 \, \alpha^1 \, \alpha^2 - 2 \, dd2 \, \alpha^1 \, \alpha^2 + 2 \, t_{12} \, \alpha^1 \, \alpha^2 - 4 \, t_{22} \, \alpha^1 \, \alpha^2 - \\
& \quad 3 \, t_{12} \, t_{22} \, \alpha^1 \, \alpha^2 + 5 \, t_{22}^2 \, \alpha^1 \, \alpha^2 + 2 \, s^2 \, (2 \, t_{12} - 3 \, t_{22}) \, t_{22}^2 \, (1 + \alpha^2) - \\
& \quad s^2 \, (-6 \, t_{22}^3 \, \alpha^1 \, \alpha^2 + t_{22}^2 \, (-9 \, \alpha^1 + 10 \, \alpha^2) - (dd1 - 2 \, dd2) \\
& \quad \quad (\alpha^1 + \alpha^2 + \alpha^1 \, \alpha^2) + t_{12} \, (-4 + (-2 + dd2 - 6 \, t_{22}) \, \alpha^2 + \\
& \quad \quad \alpha^1 \, (-3 + dd2 + 5 \, t_{22} - 2 \, \alpha^2 + dd2 \, \alpha^2 + 4 \, t_{22}^2 \, \alpha^2)) + t_{22} \\
& \quad \quad (10 + (4 - dd1 + dd2) \, \alpha^2 + \alpha^1 \, (7 + dd2 + 4 \, \alpha^2 + dd2 \, \alpha^2 - dd1 \, (1 + \alpha^2)))) - \\
& \quad s^2 \, (t_{22} \, (-6 \, t_{22}^2 \, (\alpha^1 - \alpha^2 + \alpha^1 \, \alpha^2) - (dd1 - dd2) \, (\alpha^1 + \alpha^2 + \alpha^1 \, \alpha^2) + \\
& \quad \quad t_{22} \, (14 + 5 \, \alpha^1 + 10 \, \alpha^2 + 5 \, \alpha^1 \, \alpha^2)) + t_{12} \, (4 \, t_{22}^2 \, (\alpha^1 - \alpha^2 + \alpha^1 \, \alpha^2) + \\
& \quad \quad dd2 \, (\alpha^1 + \alpha^2 + \alpha^1 \, \alpha^2) - t_{22} \, (8 + 6 \, \alpha^2 + 3 \, \alpha^1 \, (1 + \alpha^2)))) + \\
& p_{12} \, (2 + 2 \, \alpha^1 + dd2 \, \alpha^1 - t_{12} \, \alpha^1 + p_{22} \, t_{12} \, \alpha^1 - t_{22} \, \alpha^1 - p_{22} \, t_{22} \, \alpha^1 + dd2 \, \alpha^2 + \\
& \quad p_{22} \, t_{12} \, \alpha^2 + 2 \, t_{22} \, \alpha^2 - p_{22} \, t_{22} \, \alpha^2 + dd2 \, \alpha^1 \, \alpha^2 + p_{22} \, t_{12} \, \alpha^1 \, \alpha^2 + 2 \, t_{22} \, \alpha^1 \, \alpha^2 - \\
& \quad p_{22} \, t_{22} \, \alpha^1 \, \alpha^2 - t_{12} \, t_{22} \, \alpha^1 \, \alpha^2 - t_{22}^2 \, \alpha^1 \, \alpha^2 + 2 \, s^2 \, t_{12} \, t_{22}^2 \, (1 + \alpha^2) + \\
& \quad s^2 \, (dd2 \, (\alpha^1 + \alpha^2 + \alpha^1 \, \alpha^2) - t_{22}^2 \, ((-2 + p_{22}) \, \alpha^2 + \alpha^1 \, (1 + p_{22} + p_{22} \, \alpha^2)) - t_{22} \\
& \quad \quad (-4 + (-2 + dd2 + p_{22}) \, \alpha^2 + \alpha^1 \, (-3 + dd2 + p_{22} - 2 \, \alpha^2 + dd2 \, \alpha^2 + p_{22} \, \alpha^2)) + \\
& \quad \quad t_{12} \, (2 + 2 \, dd2 \, \alpha^2 + p_{22} \, \alpha^2 + 2 \, t_{22} \, \alpha^2 + p_{22} \, t_{22} \, \alpha^2 + \\
& \quad \quad \alpha^1 \, (1 - 3 \, t_{22} - 2 \, t_{22}^2 \, \alpha^2 + 2 \, dd2 \, (1 + \alpha^2) + p_{22} \, (1 + t_{22}) \, (1 + \alpha^2)))) + \\
& \quad s^2 \, (-t_{22} \, (dd2 \, (\alpha^1 + \alpha^2 + \alpha^1 \, \alpha^2) + t_{22} \, (-2 + (-2 + p_{22}) \, \alpha^2 + (-1 + p_{22}) \\
& \quad \quad \alpha^1 \, (1 + \alpha^2))) + t_{12} \, (-2 \, t_{22}^2 \, (\alpha^1 - \alpha^2 + \alpha^1 \, \alpha^2) + 2 \, dd2 \\
& \quad \quad (\alpha^1 + \alpha^2 + \alpha^1 \, \alpha^2) + t_{22} \, (4 + (2 + p_{22}) \, \alpha^2 + (1 + p_{22}) \, \alpha^1 \, (1 + \alpha^2)))) + \\
& m^2 \, (4 \, dd1 \, s^2 \, t_{12} - 4 \, dd2 \, s^2 \, t_{12} + 2 \, dd2 \, s^2 \, t_{12}^2 - 4 \, dd1 \, s^2 \, t_{22} + \\
& \quad 4 \, dd2 \, s^2 \, t_{22} + 4 \, dd1 \, s^2 \, t_{12} \, t_{22} - \\
& \quad 8 \, dd2 \, s^2 \, t_{12} \, t_{22} - 4 \, dd1 \, s^2 \, t_{22}^2 + \\
& \quad 6 \, dd2 \, s^2 \, t_{22}^2 + dd1^2 \, s^2 \, \alpha^1 - 2 \, dd1 \, dd2 \, s^2 \, \alpha^1 + \\
& \quad dd2^2 \, s^2 \, \alpha^1 + dd1^2 \, s^2 \, \alpha^1 - 2 \, dd1 \, dd2 \, s^2 \, \alpha^1 + \\
& \quad dd2^2 \, s^2 \, \alpha^1 - 3 \, dd1 \, s^2 \, t_{12} \, \alpha^1 + 3 \, dd2 \, s^2 \, t_{12} \, \alpha^1 + \\
& \quad dd1 \, s^2 \, t_{12} \, \alpha^1 - dd2 \, s^2 \, t_{12} \, \alpha^1 - \\
& \quad 2 \, dd2 \, s^2 \, t_{12}^2 \, \alpha^1 + 3 \, dd1 \, s^2 \, t_{22} \, \alpha^1 - \\
& \quad 3 \, dd2 \, s^2 \, t_{22} \, \alpha^1 - dd1 \, s^2 \, t_{22} \, \alpha^1 + \\
& \quad dd2 \, s^2 \, t_{22} \, \alpha^1 - 4 \, dd1 \, s^2 \, t_{12} \, t_{22} \, \alpha^1 + \\
& \quad 8 \, dd2 \, s^2 \, t_{12} \, t_{22} \, \alpha^1 + 4 \, dd1 \, s^2 \, t_{22}^2 \, \alpha^1 - \\
& \quad 6 \, dd2 \, s^2 \, t_{22}^2 \, \alpha^1 + dd1^2 \, s^2 \, \alpha^2 - \\
& \quad 2 \, dd1 \, dd2 \, s^2 \, \alpha^2 + dd2^2 \, s^2 \, \alpha^2 + dd1^2 \, s^2 \, \alpha^2 - \\
& \quad 2 \, dd1 \, dd2 \, s^2 \, \alpha^2 + dd2^2 \, s^2 \, \alpha^2 + 2 \, dd1 \, s^2 \, t_{12} \, \alpha^2 - \\
& \quad 2 \, dd2 \, s^2 \, t_{12} \, \alpha^2 + 2 \, dd1 \, s^2 \, t_{12} \, \alpha^2 - \\
& \quad 2 \, dd2 \, s^2 \, t_{12} \, \alpha^2 + 2 \, dd2 \, s^2 \, t_{12}^2 \, \alpha^2 + \\
& \quad 2 \, dd2 \, s^2 \, t_{12}^2 \, \alpha^2 - 2 \, dd1 \, s^2 \, t_{22} \, \alpha^2 +
\end{aligned}$$



$$\begin{aligned}
& 2 \text{ dd2 } s^2 t_{22} \alpha^2 - 2 \text{ dd1 } s^2 t_{22} \alpha^2 + \\
& 2 \text{ dd2 } s^2 t_{22} \alpha^2 + 4 \text{ dd1 } s^2 t_{12} t_{22} \alpha^2 - \\
& 8 \text{ dd2 } s^2 t_{12} t_{22} \alpha^2 + 4 \text{ dd1 } s^2 t_{12} t_{22} \alpha^2 - \\
& 8 \text{ dd2 } s^2 t_{12} t_{22} \alpha^2 - 4 \text{ dd1 } s^2 t_{22}^2 \alpha^2 + \\
& 6 \text{ dd2 } s^2 t_{22}^2 \alpha^2 - 4 \text{ dd1 } s^2 t_{22}^2 \alpha^2 + \\
& 6 \text{ dd2 } s^2 t_{22}^2 \alpha^2 + \text{ dd1}^2 s^2 \alpha^1 \alpha^2 - \\
& 2 \text{ dd1 } \text{ dd2 } s^2 \alpha^1 \alpha^2 + \text{ dd2}^2 s^2 \alpha^1 \alpha^2 + \\
& \text{ dd1}^2 s^2 \alpha^1 \alpha^2 - 2 \text{ dd1 } \text{ dd2 } s^2 \alpha^1 \alpha^2 + \\
& \text{ dd2}^2 s^2 \alpha^1 \alpha^2 - \text{ dd1 } t_{12} \alpha^1 \alpha^2 + \text{ dd2 } t_{12} \alpha^1 \alpha^2 + \\
& \text{ dd1 } s^2 t_{12} \alpha^1 \alpha^2 - \text{ dd2 } s^2 t_{12} \alpha^1 \alpha^2 - \\
& 2 \text{ dd2 } s^2 t_{12}^2 \alpha^1 \alpha^2 - 2 \text{ dd2 } s^2 t_{12}^2 \alpha^1 \alpha^2 + \\
& \text{ dd1 } t_{22} \alpha^1 \alpha^2 - \text{ dd2 } t_{22} \alpha^1 \alpha^2 - \\
& \text{ dd1 } s^2 t_{22} \alpha^1 \alpha^2 + \text{ dd2 } s^2 t_{22} \alpha^1 \alpha^2 - \\
& 4 \text{ dd1 } s^2 t_{12} t_{22} \alpha^1 \alpha^2 + 8 \text{ dd2 } s^2 t_{12} t_{22} \alpha^1 \alpha^2 - \\
& 4 \text{ dd1 } s^2 t_{12} t_{22} \alpha^1 \alpha^2 + 8 \text{ dd2 } s^2 t_{12} t_{22} \alpha^1 \alpha^2 + \\
& 4 \text{ dd1 } s^2 t_{22}^2 \alpha^1 \alpha^2 - 6 \text{ dd2 } s^2 t_{22}^2 \alpha^1 \alpha^2 + \\
& 4 \text{ dd1 } s^2 t_{22}^2 \alpha^1 \alpha^2 - 6 \text{ dd2 } s^2 t_{22}^2 \alpha^1 \alpha^2 + \\
& p_{12}^2 (1 + s^2) (1 + s^2 t_{12}) (t_{12} - t_{22}) (\alpha^1 + \alpha^2 + \alpha^1 \alpha^2) + \\
& 2 p_{22}^2 (1 + s^2) (t_{12} - t_{22}) (1 + s^2 t_{22}) (\alpha^1 + \alpha^2 + \alpha^1 \alpha^2) + \\
& p_{22} (-\text{ dd1 } \alpha^1 + \text{ dd2 } \alpha^1 + t_{12} \alpha^1 - t_{22} \alpha^1 - \text{ dd1 } \alpha^2 + \text{ dd2 } \alpha^2 - 2 t_{12} \alpha^2 + \\
& 2 t_{22} \alpha^2 - \text{ dd1 } \alpha^1 \alpha^2 + \text{ dd2 } \alpha^1 \alpha^2 - 2 t_{12} \alpha^1 \alpha^2 - t_{12}^2 \alpha^1 \alpha^2 + 2 t_{22} \alpha^1 \alpha^2 + \\
& 5 t_{12} t_{22} \alpha^1 \alpha^2 - 4 t_{22}^2 \alpha^1 \alpha^2 + 2 s^2 t_{22} (t_{12}^2 - 4 t_{12} t_{22} + 3 t_{22}^2) (1 + \alpha^2) - \\
& s^2 (t_{22}^2 (6 \alpha^1 - 8 \alpha^2) + 6 t_{22}^3 \alpha^1 \alpha^2 + (\text{ dd1 } - \text{ dd2 }) (\alpha^1 + \alpha^2 + \alpha^1 \alpha^2) + \\
& t_{12}^2 (\alpha^1 - 2 \alpha^2 + 2 t_{22} \alpha^1 \alpha^2) + t_{22} (-4 + (-2 + \text{ dd2 }) \alpha^2 + \\
& \alpha^1 (-3 + \text{ dd2 } - 2 \alpha^2 + \text{ dd2 } \alpha^2)) + t_{12} (4 + (2 + \text{ dd1 } - 2 \text{ dd2 } + 10 t_{22}) \alpha^2 + \\
& \alpha^1 (3 - 7 t_{22} + 2 \alpha^2 - 8 t_{22}^2 \alpha^2 + \text{ dd1 } (1 + \alpha^2) - 2 \text{ dd2 } (1 + \alpha^2))) - \\
& s^2 (t_{12}^2 ((-1 + 2 t_{22}) \alpha^1 (1 + \alpha^2) - 2 (1 + \alpha^2 + t_{22} \alpha^2)) + t_{12} \\
& (-8 t_{22}^2 (\alpha^1 - \alpha^2 + \alpha^1 \alpha^2) + (\text{ dd1 } - 2 \text{ dd2 }) (\alpha^1 + \alpha^2 + \alpha^1 \alpha^2) + \\
& t_{22} (12 + 5 \alpha^1 + 10 \alpha^2 + 5 \alpha^1 \alpha^2)) + t_{22} (6 t_{22}^2 (\alpha^1 - \alpha^2 + \alpha^1 \alpha^2) + \\
& \text{ dd2 } (\alpha^1 + \alpha^2 + \alpha^1 \alpha^2) - 2 t_{22} (5 + 4 \alpha^2 + 2 \alpha^1 (1 + \alpha^2)))) + \\
& p_{12} (\text{ dd1 } \alpha^1 - \text{ dd2 } \alpha^1 - t_{12} \alpha^1 - 3 p_{22} t_{12} \alpha^1 + t_{22} \alpha^1 + 3 p_{22} t_{22} \alpha^1 + \\
& \text{ dd1 } \alpha^2 - \text{ dd2 } \alpha^2 + 2 t_{12} \alpha^2 - 3 p_{22} t_{12} \alpha^2 - 2 t_{22} \alpha^2 + 3 p_{22} t_{22} \alpha^2 + \\
& \text{ dd1 } \alpha^1 \alpha^2 - \text{ dd2 } \alpha^1 \alpha^2 + 2 t_{12} \alpha^1 \alpha^2 - 3 p_{22} t_{12} \alpha^1 \alpha^2 - t_{12}^2 \alpha^1 \alpha^2 - \\
& 2 t_{22} \alpha^1 \alpha^2 + 3 p_{22} t_{22} \alpha^1 \alpha^2 - t_{12} t_{22} \alpha^1 \alpha^2 + 2 t_{22}^2 \alpha^1 \alpha^2 + \\
& 4 s^2 t_{12} (t_{12} - t_{22}) t_{22} (1 + \alpha^2) - s^2 (-(\text{ dd1 } - \text{ dd2 }) (\alpha^1 + \alpha^2 + \alpha^1 \alpha^2) - 2 \\
& t_{22}^2 ((-2 + p_{22}) \alpha^2 + \alpha^1 (1 + p_{22} + p_{22} \alpha^2)) + t_{12}^2 ((-2 + p_{22}) \alpha^2 + \\
& \alpha^1 (3 + p_{22} + p_{22} \alpha^2 + 4 t_{22} \alpha^2)) + t_{22} (4 + (2 + \text{ dd1 } - 2 \text{ dd2 } - 3 p_{22}) \alpha^2 + \\
& \alpha^1 (3 - 3 p_{22} + 2 \alpha^2 - 3 p_{22} \alpha^2 + \text{ dd1 } (1 + \alpha^2) - 2 \text{ dd2 } (1 + \alpha^2))) + \\
& t_{12} (-4 + (-2 - 2 \text{ dd1 } + 3 \text{ dd2 } + 3 p_{22} - 2 t_{22} + p_{22} t_{22}) \alpha^2 + \\
& \alpha^1 (-3 + 3 p_{22} - t_{22} + p_{22} t_{22} - 2 \alpha^2 + 3 p_{22} \alpha^2 + p_{22} t_{22} \alpha^2 - \\
& 4 t_{22}^2 \alpha^2 - 2 \text{ dd1 } (1 + \alpha^2) + 3 \text{ dd2 } (1 + \alpha^2)))) - \\
& s^2 (t_{12}^2 (-4 + (-2 + p_{22} - 4 t_{22}) \alpha^2 + (-1 + p_{22} + 4 t_{22}) \alpha^1 (1 + \alpha^2)) + t_{22} \\
& ((\text{ dd1 } - 2 \text{ dd2 }) (\alpha^1 + \alpha^2 + \alpha^1 \alpha^2) - 2 t_{22} (-2 + (-2 + p_{22}) \alpha^2 + (-1 + p_{22}) \alpha^1 \\
& (1 + \alpha^2))) + t_{12} (-2 \text{ dd1 } (\alpha^1 + \alpha^2 + \alpha^1 \alpha^2) + 3 \text{ dd2 } (\alpha^1 + \alpha^2 + \alpha^1 \alpha^2) + \\
& t_{22} ((-2 + p_{22} + 4 t_{22}) \alpha^2 + (-1 + p_{22} - 4 t_{22}) \alpha^1 (1 + \alpha^2)))))) / \\
& (2 (1 + m_2 s^2 (t_{12} - t_{22}) + s^2 t_{22}) (1 + s^2 t_{22} + m_2 (t_{12} - t_{22}) (s^2 - \alpha^1) + \\
& \alpha^1 - t_{22} \alpha^1) \\
& (1 + t_{22} \alpha^2 + s^2 t_{22} (1 + \alpha^2) + m_2 (t_{12} - t_{22}) (s^2 + \alpha^2 + s^2 \alpha^2))), \\
& ((1 + s^2) (m_2 (t_{12} - t_{22}) + t_{22}) \\
& (2 + \alpha^1 + p_{22} \alpha^1 - \\
& t_{22} \alpha^1 - p_{22} t_{22} \alpha^1 + \\
& p_{22} \alpha^2 + 2 t_{22} \alpha^2 -
\end{aligned}$$

$$\begin{aligned}
& p22 \, t22 \, \alpha 2 + \\
& p22 \, \alpha 1 \, \alpha 2 + t22 \, \alpha 1 \, \alpha 2 - \\
& p22 \, t22 \, \alpha 1 \, \alpha 2 - \\
& t22^2 \, \alpha 1 \, \alpha 2 + \\
& 2 \, s2^2 \, t22^2 \, (1 + \alpha 2) + \\
& s2 \, (dd2 \, (\alpha 1 + \alpha 2 + \alpha 1 \, \alpha 2) + t22 \, (4 + (2 - dd2 + p22) \, \alpha 2 - (-1 + dd2 - p22) \, \alpha 1 \, (1 + \alpha 2)) - \\
& \quad t22^2 \, ((-2 + p22) \, \alpha 2 + (1 + p22) \, \alpha 1 \, (1 + \alpha 2))) + \\
& m2^2 \, (t12 - t22) \, (p22 \, \alpha 1 + p22 \, \alpha 2 + p22 \, \alpha 1 \, \alpha 2 - t12 \, \alpha 1 \, \alpha 2 + t22 \, \alpha 1 \, \alpha 2 + \\
& \quad 2 \, s2^2 \, (t12 - t22) \, (1 + \alpha 2) - p12 \, (\alpha 1 + \alpha 2 + \alpha 1 \, \alpha 2) + \\
& \quad s2 \, (-t12 \, \alpha 1 - p12 \, t12 \, \alpha 1 + t22 \, \alpha 1 + p22 \, t22 \, \alpha 1 + 2 \, t12 \, \alpha 2 - p12 \, t12 \, \alpha 2 - \\
& \quad 2 \, t22 \, \alpha 2 + p22 \, t22 \, \alpha 2 - t12 \, \alpha 1 \, \alpha 2 - p12 \, t12 \, \alpha 1 \, \alpha 2 + t22 \, \alpha 1 \, \alpha 2 + \\
& \quad p22 \, t22 \, \alpha 1 \, \alpha 2 - dd1 \, (\alpha 1 + \alpha 2 + \alpha 1 \, \alpha 2) + dd2 \, (\alpha 1 + \alpha 2 + \alpha 1 \, \alpha 2))) + \\
& m2 \, (p12 \, \alpha 1 - p22 \, \alpha 1 - t12 \, \alpha 1 - p22 \, t12 \, \alpha 1 + t22 \, \alpha 1 - p12 \, t22 \, \alpha 1 + 2 \, p22 \, t22 \, \alpha 1 + \\
& \quad p12 \, \alpha 2 - p22 \, \alpha 2 + 2 \, t12 \, \alpha 2 - p22 \, t12 \, \alpha 2 - 2 \, t22 \, \alpha 2 - \\
& \quad p12 \, t22 \, \alpha 2 + 2 \, p22 \, t22 \, \alpha 2 + p12 \, \alpha 1 \, \alpha 2 - p22 \, \alpha 1 \, \alpha 2 + t12 \, \alpha 1 \, \alpha 2 - \\
& \quad p22 \, t12 \, \alpha 1 \, \alpha 2 - t22 \, \alpha 1 \, \alpha 2 - p12 \, t22 \, \alpha 1 \, \alpha 2 + 2 \, p22 \, t22 \, \alpha 1 \, \alpha 2 - \\
& \quad 2 \, t12 \, t22 \, \alpha 1 \, \alpha 2 + 2 \, t22^2 \, \alpha 1 \, \alpha 2 + 4 \, s2^2 \, (t12 - t22) \, t22 \, (1 + \alpha 2) - s2 \\
& \quad (- (dd1 - dd2) \, (\alpha 1 + \alpha 2 + \alpha 1 \, \alpha 2) - 2 \, t22^2 \, ((-2 + p22) \, \alpha 2 + (1 + p22) \, \alpha 1 \, (1 + \alpha 2)) + \\
& \quad t22 \, (4 + (2 + dd1 - 2 \, dd2 + p22) \, \alpha 2 + (1 + dd1 - 2 \, dd2 + p22) \, \alpha 1 \, (1 + \alpha 2)) + \\
& \quad t12 \, (-4 + (-2 + dd2 + p12 \, (-1 + t22) - 4 \, t22 + p22 \, t22) \, \alpha 2 + \\
& \quad (-1 + dd2 + p12 \, (-1 + t22) + 2 \, t22 + p22 \, t22) \, \alpha 1 \, (1 + \alpha 2)))) / \\
& (2 \, (1 + m2 \, s2 \, (t12 - t22) + s2 \, t22) \, (1 + s2 \, t22 + m2 \, (t12 - t22) \, (s2 - \alpha 1) + \\
& \quad \alpha 1 - t22 \, \alpha 1) \\
& \quad (1 + t22 \, \alpha 2 + s2 \, t22 \, (1 + \alpha 2) + m2 \, (t12 - t22) \, (s2 + \alpha 2 + s2 \, \alpha 2))), \\
& - \left( (1 + s2) \, (1 + m2 \, s2 \, ((1 - p12) \, t12 + p12 \, t12 - (1 - p22) \, t22 - p22 \, t22) + \right. \\
& \quad \left. s2 \, ((1 - p22) \, t22 + p22 \, t22))^2 \right. \\
& \quad \left( (r \, (1 + s2) \, (dd2 + m2 \, (dd1 - dd2 + (1 - p12) \, (1 - t12) - (1 - p22) \, (1 - t22)) + \right. \\
& \quad \left. (1 - p22) \, (1 - t22)) \, (dd2 + p22 \, t22 + m2 \, (dd1 - dd2 + p12 \, t12 - p22 \, t22))) / \right. \\
& \quad (-dd2 + p22 \, (1 - t22) + (1 - p22) \, t22 + p22 \, t22 + s2 \, (-dd2 + (1 - p22) \, t22) + \\
& \quad s2 \, (dd2 + p22 \, t22) + (-dd2 + p22 \, (1 - t22)) \, \alpha 1 + (dd2 + (1 - p22) \, (1 - t22)) \\
& \quad (1 + \alpha 1) + m2 \, (-dd1 + p12 \, (1 - t12) + (1 - p12) \, t12 + p12 \, t12 + \\
& \quad s2 \, (-dd1 + (1 - p12) \, t12) + s2 \, (dd1 + p12 \, t12) - (1 - p22) \, (1 - t22) - \\
& \quad p22 \, (1 - t22) - (1 - p22) \, t22 - p22 \, t22 - s2 \, (-dd2 + (1 - p22) \, t22) - s2 \\
& \quad (dd2 + p22 \, t22) + (-dd1 + p12 \, (1 - t12)) \, \alpha 1 - (dd2 + (1 - p22) \, (1 - t22)) \\
& \quad \alpha 1 - (-dd2 + p22 \, (1 - t22)) \, \alpha 1 + (dd1 + (1 - p12) \, (1 - t12)) \, (1 + \alpha 1))) + \\
& \quad ((dd2 + m2 \, (dd1 - dd2 + (1 - p12) \, (1 - t12) - (1 - p22) \, (1 - t22)) + (1 - p22) \\
& \quad (1 - t22)) \, (-dd2 + m2 \, (-dd1 + dd2 + p12 \, (1 - t12) - p22 \, (1 - t22)) + \\
& \quad p22 \, (1 - t22)) \, (1 + \alpha 1)) / (-dd2 + p22 \, (1 - t22) + (1 - p22) \, t22 + \\
& \quad p22 \, t22 + s2 \, (-dd2 + (1 - p22) \, t22) + s2 \, (dd2 + p22 \, t22) + \\
& \quad (-dd2 + p22 \, (1 - t22)) \, \alpha 1 + (dd2 + (1 - p22) \, (1 - t22)) \, (1 + \alpha 1) + \\
& \quad m2 \, (-dd1 + p12 \, (1 - t12) + (1 - p12) \, t12 + p12 \, t12 + s2 \, (-dd1 + (1 - p12) \, t12) + \\
& \quad s2 \, (dd1 + p12 \, t12) - (1 - p22) \, (1 - t22) - p22 \, (1 - t22) - (1 - p22) \, t22 - \\
& \quad p22 \, t22 - s2 \, (-dd2 + (1 - p22) \, t22) - s2 \, (dd2 + p22 \, t22) + \\
& \quad (-dd1 + p12 \, (1 - t12)) \, \alpha 1 - (dd2 + (1 - p22) \, (1 - t22)) \, \alpha 1 - \\
& \quad (-dd2 + p22 \, (1 - t22)) \, \alpha 1 + (dd1 + (1 - p12) \, (1 - t12)) \, (1 + \alpha 1))) - \\
& \quad ((-1 + r) \, (1 + s2) \, (-dd2 + m2 \, (-dd1 + dd2 + p12 \, (1 - t12) - p22 \, (1 - t22)) + \\
& \quad p22 \, (1 - t22)) \, (-dd2 + (1 - p22) \, t22 + \\
& \quad m2 \, (-dd1 + dd2 + (1 - p12) \, t12 - (1 - p22) \, t22)) \, (1 + \alpha 1)) / \\
& \quad (-dd2 + p22 \, (1 - t22) + (1 - p22) \, t22 + p22 \, t22 + s2 \, (-dd2 + (1 - p22) \, t22) + \\
& \quad s2 \, (dd2 + p22 \, t22) + (-dd2 + p22 \, (1 - t22)) \, \alpha 1 + (dd2 + (1 - p22) \, (1 - t22))
\end{aligned}$$



$$\begin{aligned}
& m2 (-dd1 + dd2 + (1 - p12) t12 - (1 - p22) t22)) (1 + \alpha2)) / \\
& ((1 - p22) (1 - t22) + p22 (1 - t22) + (1 - p22) t22 + p22 t22 + \\
& s2 (-dd2 + (1 - p22) t22) + s2 (dd2 + p22 t22) + (-dd2 + (1 - p22) t22) \alpha2 + \\
& s2 (-dd2 + (1 - p22) t22) \alpha2 + (dd2 + p22 t22) \alpha2 + s2 (dd2 + p22 t22) \alpha2 + \\
& m2 (dd1 + (1 - p12) (1 - t12) + p12 (1 - t12) + p12 t12 + s2 (dd1 + p12 t12) - \\
& (1 - p22) (1 - t22) - p22 (1 - t22) - (1 - p22) t22 - p22 t22 - \\
& s2 (-dd2 + (1 - p22) t22) - s2 (dd2 + p22 t22) + (dd1 + p12 t12) \alpha2 + \\
& s2 (dd1 + p12 t12) \alpha2 - (-dd2 + (1 - p22) t22) \alpha2 - \\
& s2 (-dd2 + (1 - p22) t22) \alpha2 - (dd2 + p22 t22) \alpha2 - \\
& s2 (dd2 + p22 t22) \alpha2 + (1 + s2) (-dd1 + (1 - p12) t12) (1 + \alpha2))) + \\
& ((1 + s2) (-dd2 + m2 (-dd1 + dd2 + p12 (1 - t12) - p22 (1 - t22)) + p22 (1 - t22)) \\
& (dd2 + p22 t22 + m2 (dd1 - dd2 + p12 t12 - p22 t22)) (1 + \alpha2)) / \\
& ((1 - p22) (1 - t22) + p22 (1 - t22) + (1 - p22) t22 + p22 t22 + \\
& s2 (-dd2 + (1 - p22) t22) + s2 (dd2 + p22 t22) + (-dd2 + (1 - p22) t22) \alpha2 + \\
& s2 (-dd2 + (1 - p22) t22) \alpha2 + (dd2 + p22 t22) \alpha2 + s2 (dd2 + p22 t22) \alpha2 + \\
& m2 (dd1 + (1 - p12) (1 - t12) + p12 (1 - t12) + p12 t12 + s2 (dd1 + p12 t12) - \\
& (1 - p22) (1 - t22) - p22 (1 - t22) - (1 - p22) t22 - p22 t22 - \\
& s2 (-dd2 + (1 - p22) t22) - s2 (dd2 + p22 t22) + (dd1 + p12 t12) \alpha2 + \\
& s2 (dd1 + p12 t12) \alpha2 - (-dd2 + (1 - p22) t22) \alpha2 - \\
& s2 (-dd2 + (1 - p22) t22) \alpha2 - (dd2 + p22 t22) \alpha2 - \\
& s2 (dd2 + p22 t22) \alpha2 + (1 + s2) (-dd1 + (1 - p12) t12) (1 + \alpha2))) \\
& (((dd2 + m2 (dd1 - dd2 + (1 - p12) (1 - t12) - (1 - p22) (1 - t22)) + \\
& (1 - p22) (1 - t22)) (-dd2 + (1 - p22) t22 + \\
& m2 (-dd1 + dd2 + (1 - p12) t12 - (1 - p22) t22))) / (-dd2 + p22 (1 - t22) + \\
& (1 - p22) t22 + p22 t22 + s2 (-dd2 + (1 - p22) t22) + s2 (dd2 + p22 t22) + \\
& (-dd2 + p22 (1 - t22)) \alpha1 + (dd2 + (1 - p22) (1 - t22)) (1 + \alpha1) + \\
& m2 (-dd1 + p12 (1 - t12) + (1 - p12) t12 + p12 t12 + s2 (-dd1 + (1 - p12) t12) + \\
& s2 (dd1 + p12 t12) - (1 - p22) (1 - t22) - p22 (1 - t22) - (1 - p22) t22 - \\
& p22 t22 - s2 (-dd2 + (1 - p22) t22) - s2 (dd2 + p22 t22) + \\
& (-dd1 + p12 (1 - t12)) \alpha1 - (dd2 + (1 - p22) (1 - t22)) \alpha1 - \\
& (-dd2 + p22 (1 - t22)) \alpha1 + (dd1 + (1 - p12) (1 - t12)) (1 + \alpha1))) + \\
& (2 (1 + s2) (-dd2 + (1 - p22) t22 + m2 (-dd1 + dd2 + (1 - p12) t12 - \\
& (1 - p22) t22))^2) / (-dd2 + p22 (1 - t22) + (1 - p22) t22 + \\
& p22 t22 + s2 (-dd2 + (1 - p22) t22) + s2 (dd2 + p22 t22) + \\
& (-dd2 + p22 (1 - t22)) \alpha1 + (dd2 + (1 - p22) (1 - t22)) (1 + \alpha1) + \\
& m2 (-dd1 + p12 (1 - t12) + (1 - p12) t12 + p12 t12 + s2 (-dd1 + (1 - p12) t12) + \\
& s2 (dd1 + p12 t12) - (1 - p22) (1 - t22) - p22 (1 - t22) - (1 - p22) t22 - \\
& p22 t22 - s2 (-dd2 + (1 - p22) t22) - s2 (dd2 + p22 t22) + \\
& (-dd1 + p12 (1 - t12)) \alpha1 - (dd2 + (1 - p22) (1 - t22)) \alpha1 - \\
& (-dd2 + p22 (1 - t22)) \alpha1 + (dd1 + (1 - p12) (1 - t12)) (1 + \alpha1))) + \\
& (r (dd2 + m2 (dd1 - dd2 + (1 - p12) (1 - t12) - (1 - p22) (1 - t22)) + \\
& (1 - p22) (1 - t22)) (dd2 + p22 t22 + m2 (dd1 - dd2 + p12 t12 - p22 t22))) / \\
& (-dd2 + p22 (1 - t22) + (1 - p22) t22 + p22 t22 + s2 (-dd2 + (1 - p22) t22) + \\
& s2 (dd2 + p22 t22) + (-dd2 + p22 (1 - t22)) \alpha1 + (dd2 + (1 - p22) (1 - t22)) \\
& (1 + \alpha1) + m2 (-dd1 + p12 (1 - t12) + (1 - p12) t12 + p12 t12 + \\
& s2 (-dd1 + (1 - p12) t12) + s2 (dd1 + p12 t12) - (1 - p22) (1 - t22) - \\
& p22 (1 - t22) - (1 - p22) t22 - p22 t22 - s2 (-dd2 + (1 - p22) t22) - s2 \\
& (dd2 + p22 t22) + (-dd1 + p12 (1 - t12)) \alpha1 - (dd2 + (1 - p22) (1 - t22)) \\
& \alpha1 - (-dd2 + p22 (1 - t22)) \alpha1 + (dd1 + (1 - p12) (1 - t12)) (1 + \alpha1))) +
\end{aligned}$$

$$\begin{aligned}
& \left( (1 + s_2) (-dd_2 + (1 - p_{22}) t_{22} + m_2 (-dd_1 + dd_2 + (1 - p_{12}) t_{12} - (1 - p_{22}) t_{22})) \right. \\
& \quad \left. (dd_2 + p_{22} t_{22} + m_2 (dd_1 - dd_2 + p_{12} t_{12} - p_{22} t_{22})) \right) / (-dd_2 + p_{22} (1 - t_{22}) + \\
& \quad (1 - p_{22}) t_{22} + p_{22} t_{22} + s_2 (-dd_2 + (1 - p_{22}) t_{22}) + s_2 (dd_2 + p_{22} t_{22}) + \\
& \quad (-dd_2 + p_{22} (1 - t_{22})) \alpha_1 + (dd_2 + (1 - p_{22}) (1 - t_{22})) (1 + \alpha_1) + \\
& \quad m_2 (-dd_1 + p_{12} (1 - t_{12}) + (1 - p_{12}) t_{12} + p_{12} t_{12} + s_2 (-dd_1 + (1 - p_{12}) t_{12}) + \\
& \quad s_2 (dd_1 + p_{12} t_{12}) - (1 - p_{22}) (1 - t_{22}) - p_{22} (1 - t_{22}) - (1 - p_{22}) t_{22} - \\
& \quad p_{22} t_{22} - s_2 (-dd_2 + (1 - p_{22}) t_{22}) - s_2 (dd_2 + p_{22} t_{22}) + \\
& \quad (-dd_1 + p_{12} (1 - t_{12})) \alpha_1 - (dd_2 + (1 - p_{22}) (1 - t_{22})) \alpha_1 - \\
& \quad (-dd_2 + p_{22} (1 - t_{22})) \alpha_1 + (dd_1 + (1 - p_{12}) (1 - t_{12})) (1 + \alpha_1)) + \\
& \quad ((dd_2 + m_2 (dd_1 - dd_2 + (1 - p_{12}) (1 - t_{12}) - (1 - p_{22}) (1 - t_{22})) + \\
& \quad (1 - p_{22}) (1 - t_{22})) (-dd_2 + (1 - p_{22}) t_{22} + \\
& \quad m_2 (-dd_1 + dd_2 + (1 - p_{12}) t_{12} - (1 - p_{22}) t_{22})) (1 + \alpha_1)) / \\
& \quad (-dd_2 + p_{22} (1 - t_{22}) + (1 - p_{22}) t_{22} + p_{22} t_{22} + s_2 (-dd_2 + (1 - p_{22}) t_{22}) + \\
& \quad s_2 (dd_2 + p_{22} t_{22}) + (-dd_2 + p_{22} (1 - t_{22})) \alpha_1 + (dd_2 + (1 - p_{22}) (1 - t_{22})) \\
& \quad (1 + \alpha_1) + m_2 (-dd_1 + p_{12} (1 - t_{12}) + (1 - p_{12}) t_{12} + p_{12} t_{12} + \\
& \quad s_2 (-dd_1 + (1 - p_{12}) t_{12}) + s_2 (dd_1 + p_{12} t_{12}) - (1 - p_{22}) (1 - t_{22}) - \\
& \quad p_{22} (1 - t_{22}) - (1 - p_{22}) t_{22} - p_{22} t_{22} - s_2 (-dd_2 + (1 - p_{22}) t_{22}) - s_2 \\
& \quad (dd_2 + p_{22} t_{22}) + (-dd_1 + p_{12} (1 - t_{12})) \alpha_1 - (dd_2 + (1 - p_{22}) (1 - t_{22})) \\
& \quad \alpha_1 - (-dd_2 + p_{22} (1 - t_{22})) \alpha_1 + (dd_1 + (1 - p_{12}) (1 - t_{12})) (1 + \alpha_1)) - \\
& \quad ((-1 + r) (-dd_2 + m_2 (-dd_1 + dd_2 + p_{12} (1 - t_{12}) - p_{22} (1 - t_{22})) + p_{22} (1 - t_{22})) \\
& \quad (-dd_2 + (1 - p_{22}) t_{22} + m_2 (-dd_1 + dd_2 + (1 - p_{12}) t_{12} - (1 - p_{22}) t_{22})) \\
& \quad (1 + \alpha_1)) / (-dd_2 + p_{22} (1 - t_{22}) + (1 - p_{22}) t_{22} + \\
& \quad p_{22} t_{22} + s_2 (-dd_2 + (1 - p_{22}) t_{22}) + s_2 (dd_2 + p_{22} t_{22}) + \\
& \quad (-dd_2 + p_{22} (1 - t_{22})) \alpha_1 + (dd_2 + (1 - p_{22}) (1 - t_{22})) (1 + \alpha_1) + \\
& \quad m_2 (-dd_1 + p_{12} (1 - t_{12}) + (1 - p_{12}) t_{12} + p_{12} t_{12} + s_2 (-dd_1 + (1 - p_{12}) t_{12}) + \\
& \quad s_2 (dd_1 + p_{12} t_{12}) - (1 - p_{22}) (1 - t_{22}) - p_{22} (1 - t_{22}) - (1 - p_{22}) t_{22} - \\
& \quad p_{22} t_{22} - s_2 (-dd_2 + (1 - p_{22}) t_{22}) - s_2 (dd_2 + p_{22} t_{22}) + \\
& \quad (-dd_1 + p_{12} (1 - t_{12})) \alpha_1 - (dd_2 + (1 - p_{22}) (1 - t_{22})) \alpha_1 - \\
& \quad (-dd_2 + p_{22} (1 - t_{22})) \alpha_1 + (dd_1 + (1 - p_{12}) (1 - t_{12})) (1 + \alpha_1)) + \\
& \quad (r (dd_2 + m_2 (dd_1 - dd_2 + (1 - p_{12}) (1 - t_{12}) - (1 - p_{22}) (1 - t_{22})) + \\
& \quad (1 - p_{22}) (1 - t_{22})) (dd_2 + p_{22} t_{22} + m_2 (dd_1 - dd_2 + p_{12} t_{12} - p_{22} t_{22})) / \\
& \quad ((1 - p_{22}) (1 - t_{22}) + p_{22} (1 - t_{22}) + (1 - p_{22}) t_{22} + p_{22} t_{22} + \\
& \quad s_2 (-dd_2 + (1 - p_{22}) t_{22}) + s_2 (dd_2 + p_{22} t_{22}) + (-dd_2 + (1 - p_{22}) t_{22}) \alpha_2 + \\
& \quad s_2 (-dd_2 + (1 - p_{22}) t_{22}) \alpha_2 + (dd_2 + p_{22} t_{22}) \alpha_2 + s_2 (dd_2 + p_{22} t_{22}) \alpha_2 + \\
& \quad m_2 (dd_1 + (1 - p_{12}) (1 - t_{12}) + p_{12} (1 - t_{12}) + p_{12} t_{12} + s_2 (dd_1 + p_{12} t_{12}) - \\
& \quad (1 - p_{22}) (1 - t_{22}) - p_{22} (1 - t_{22}) - (1 - p_{22}) t_{22} - p_{22} t_{22} - \\
& \quad s_2 (-dd_2 + (1 - p_{22}) t_{22}) - s_2 (dd_2 + p_{22} t_{22}) + (dd_1 + p_{12} t_{12}) \alpha_2 + \\
& \quad s_2 (dd_1 + p_{12} t_{12}) \alpha_2 - (-dd_2 + (1 - p_{22}) t_{22}) \alpha_2 - \\
& \quad s_2 (-dd_2 + (1 - p_{22}) t_{22}) \alpha_2 - (dd_2 + p_{22} t_{22}) \alpha_2 - \\
& \quad s_2 (dd_2 + p_{22} t_{22}) \alpha_2 + (1 + s_2) (-dd_1 + (1 - p_{12}) t_{12}) (1 + \alpha_2)) - \\
& \quad ((-1 + r) (-dd_2 + m_2 (-dd_1 + dd_2 + p_{12} (1 - t_{12}) - p_{22} (1 - t_{22})) + p_{22} (1 - t_{22})) \\
& \quad (-dd_2 + (1 - p_{22}) t_{22} + m_2 (-dd_1 + dd_2 + (1 - p_{12}) t_{12} - (1 - p_{22}) t_{22})) \\
& \quad (1 + \alpha_2)) / ((1 - p_{22}) (1 - t_{22}) + p_{22} (1 - t_{22}) + (1 - p_{22}) t_{22} + \\
& \quad p_{22} t_{22} + s_2 (-dd_2 + (1 - p_{22}) t_{22}) + s_2 (dd_2 + p_{22} t_{22}) + \\
& \quad (-dd_2 + (1 - p_{22}) t_{22}) \alpha_2 + s_2 (-dd_2 + (1 - p_{22}) t_{22}) \alpha_2 + (dd_2 + p_{22} t_{22}) \alpha_2 + \\
& \quad s_2 (dd_2 + p_{22} t_{22}) \alpha_2 + m_2 (dd_1 + (1 - p_{12}) (1 - t_{12}) + p_{12} (1 - t_{12}) + \\
& \quad p_{12} t_{12} + s_2 (dd_1 + p_{12} t_{12}) - (1 - p_{22}) (1 - t_{22}) - p_{22} (1 - t_{22}) - \\
& \quad (1 - p_{22}) t_{22} - p_{22} t_{22} - s_2 (-dd_2 + (1 - p_{22}) t_{22}) - s_2 (dd_2 + p_{22} t_{22}) + \\
& \quad (dd_1 + p_{12} t_{12}) \alpha_2 + s_2 (dd_1 + p_{12} t_{12}) \alpha_2 - (-dd_2 + (1 - p_{22}) t_{22}) \alpha_2 - \\
& \quad s_2 (-dd_2 + (1 - p_{22}) t_{22}) \alpha_2 - (dd_2 + p_{22} t_{22}) \alpha_2 -
\end{aligned}$$

$$\begin{aligned}
& \left( \frac{s2 (dd2 + p22 t22) \alpha2 + (1 + s2) (-dd1 + (1 - p12) t12) (1 + \alpha2)}{(1 + s2) (-dd2 + (1 - p22) t22 + m2 (-dd1 + dd2 + (1 - p12) t12 - (1 - p22) t22))} \right. \\
& \quad \left( dd2 + p22 t22 + m2 (dd1 - dd2 + p12 t12 - p22 t22) \right) (1 + \alpha2) \Big/ \\
& \quad \left( (1 - p22) (1 - t22) + p22 (1 - t22) + (1 - p22) t22 + p22 t22 + \right. \\
& \quad s2 (-dd2 + (1 - p22) t22) + s2 (dd2 + p22 t22) + (-dd2 + (1 - p22) t22) \alpha2 + \\
& \quad s2 (-dd2 + (1 - p22) t22) \alpha2 + (dd2 + p22 t22) \alpha2 + s2 (dd2 + p22 t22) \alpha2 + \\
& \quad m2 (dd1 + (1 - p12) (1 - t12) + p12 (1 - t12) + p12 t12 + s2 (dd1 + p12 t12) - \\
& \quad (1 - p22) (1 - t22) - p22 (1 - t22) - (1 - p22) t22 - p22 t22 - \\
& \quad s2 (-dd2 + (1 - p22) t22) - s2 (dd2 + p22 t22) + (dd1 + p12 t12) \alpha2 + \\
& \quad s2 (dd1 + p12 t12) \alpha2 - (-dd2 + (1 - p22) t22) \alpha2 - \\
& \quad s2 (-dd2 + (1 - p22) t22) \alpha2 - (dd2 + p22 t22) \alpha2 - \\
& \quad \left. \left. s2 (dd2 + p22 t22) \alpha2 + (1 + s2) (-dd1 + (1 - p12) t12) (1 + \alpha2) \right) \right) \Big/ \\
& \quad \left( 4 (1 + s2 ((1 - p22) t22 + p22 t22 + m2 ((1 - p12) t12 + p12 t12 - \right. \\
& \quad \left. (1 - p22) t22 - p22 t22)) \right)^4 \Big) + \\
& \quad \left( (1 + s2) (1 + m2 s2 ((1 - p12) t12 + p12 t12 - (1 - p22) t22 - p22 t22) + \right. \\
& \quad \left. s2 ((1 - p22) t22 + p22 t22))^2 \right. \\
& \quad \left( ((1 + s2) (dd2 + m2 (dd1 - dd2 + (1 - p12) (1 - t12) - (1 - p22) (1 - t22)) + \right. \\
& \quad (1 - p22) (1 - t22)) \\
& \quad (-dd2 + (1 - p22) t22 + m2 (-dd1 + dd2 + (1 - p12) t12 - (1 - p22) t22)) \Big/ \\
& \quad (-dd2 + p22 (1 - t22) + (1 - p22) t22 + p22 t22 + s2 (-dd2 + (1 - p22) t22) + \\
& \quad s2 (dd2 + p22 t22) + (-dd2 + p22 (1 - t22)) \alpha1 + \\
& \quad (dd2 + (1 - p22) (1 - t22)) (1 + \alpha1) + \\
& \quad m2 (-dd1 + p12 (1 - t12) + (1 - p12) t12 + p12 t12 + s2 (-dd1 + (1 - p12) t12) + \\
& \quad s2 (dd1 + p12 t12) - (1 - p22) (1 - t22) - p22 (1 - t22) - (1 - p22) \\
& \quad t22 - p22 t22 - s2 (-dd2 + (1 - p22) t22) - s2 (dd2 + p22 t22) + \\
& \quad (-dd1 + p12 (1 - t12)) \alpha1 - (dd2 + (1 - p22) (1 - t22)) \alpha1 - \\
& \quad (-dd2 + p22 (1 - t22)) \alpha1 + (dd1 + (1 - p12) (1 - t12)) (1 + \alpha1) \Big) - \\
& \quad \left( (-1 + r) (1 + s2) (dd2 + m2 (dd1 - dd2 + (1 - p12) (1 - t12) - (1 - p22) (1 - t22)) + \right. \\
& \quad (1 - p22) (1 - t22)) (dd2 + p22 t22 + m2 (dd1 - dd2 + p12 t12 - p22 t22)) \Big) \Big/ \\
& \quad (-dd2 + p22 (1 - t22) + (1 - p22) t22 + p22 t22 + s2 (-dd2 + (1 - p22) t22) + \\
& \quad s2 (dd2 + p22 t22) + (-dd2 + p22 (1 - t22)) \alpha1 + \\
& \quad (dd2 + (1 - p22) (1 - t22)) (1 + \alpha1) + \\
& \quad m2 (-dd1 + p12 (1 - t12) + (1 - p12) t12 + p12 t12 + s2 (-dd1 + (1 - p12) t12) + \\
& \quad s2 (dd1 + p12 t12) - (1 - p22) (1 - t22) - p22 (1 - t22) - (1 - p22) \\
& \quad t22 - p22 t22 - s2 (-dd2 + (1 - p22) t22) - s2 (dd2 + p22 t22) + \\
& \quad (-dd1 + p12 (1 - t12)) \alpha1 - (dd2 + (1 - p22) (1 - t22)) \alpha1 - \\
& \quad (-dd2 + p22 (1 - t22)) \alpha1 + (dd1 + (1 - p12) (1 - t12)) (1 + \alpha1) \Big) \Big) + \\
& \quad \left( 2 (dd2 + m2 (dd1 - dd2 + (1 - p12) (1 - t12) - (1 - p22) (1 - t22)) + \right. \\
& \quad \left. (1 - p22) (1 - t22))^2 (1 + \alpha1) \right) \Big/ \\
& \quad (-dd2 + p22 (1 - t22) + (1 - p22) t22 + p22 t22 + s2 (-dd2 + (1 - p22) t22) + \\
& \quad s2 (dd2 + p22 t22) + (-dd2 + p22 (1 - t22)) \alpha1 + \\
& \quad (dd2 + (1 - p22) (1 - t22)) (1 + \alpha1) + \\
& \quad m2 (-dd1 + p12 (1 - t12) + (1 - p12) t12 + p12 t12 + s2 (-dd1 + (1 - p12) t12) + \\
& \quad s2 (dd1 + p12 t12) - (1 - p22) (1 - t22) - p22 (1 - t22) - (1 - p22) \\
& \quad t22 - p22 t22 - s2 (-dd2 + (1 - p22) t22) - s2 (dd2 + p22 t22) + \\
& \quad (-dd1 + p12 (1 - t12)) \alpha1 - (dd2 + (1 - p22) (1 - t22)) \alpha1 - \\
& \quad (-dd2 + p22 (1 - t22)) \alpha1 + (dd1 + (1 - p12) (1 - t12)) (1 + \alpha1) \Big) \Big) + \\
& \quad \left( (dd2 + m2 (dd1 - dd2 + (1 - p12) (1 - t12) - (1 - p22) (1 - t22)) + \right.
\end{aligned}$$

$$\begin{aligned}
& (1 - p_{22}) (1 - t_{22}) \\
& (-dd_1 + m_2 (-dd_1 + dd_2 + p_{12} (1 - t_{12}) - p_{22} (1 - t_{22})) + p_{22} (1 - t_{22})) \\
& (1 + \alpha_1) / (-dd_2 + p_{22} (1 - t_{22}) + (1 - p_{22}) t_{22} + p_{22} t_{22} + \\
& s_2 (-dd_2 + (1 - p_{22}) t_{22}) + s_2 (dd_2 + p_{22} t_{22}) + \\
& (-dd_2 + p_{22} (1 - t_{22})) \alpha_1 + (dd_2 + (1 - p_{22}) (1 - t_{22})) (1 + \alpha_1) + \\
& m_2 (-dd_1 + p_{12} (1 - t_{12}) + (1 - p_{12}) t_{12} + p_{12} t_{12} + s_2 (-dd_1 + (1 - p_{12}) t_{12}) + \\
& s_2 (dd_1 + p_{12} t_{12}) - (1 - p_{22}) (1 - t_{22}) - p_{22} (1 - t_{22}) - (1 - p_{22}) \\
& t_{22} - p_{22} t_{22} - s_2 (-dd_2 + (1 - p_{22}) t_{22}) - s_2 (dd_2 + p_{22} t_{22}) + \\
& (-dd_1 + p_{12} (1 - t_{12})) \alpha_1 - (dd_2 + (1 - p_{22}) (1 - t_{22})) \alpha_1 - \\
& (-dd_2 + p_{22} (1 - t_{22})) \alpha_1 + (dd_1 + (1 - p_{12}) (1 - t_{12})) (1 + \alpha_1) + \\
& ((1 + s_2) (dd_2 + m_2 (dd_1 - dd_2 + (1 - p_{12}) (1 - t_{12}) - (1 - p_{22}) (1 - t_{22})) + \\
& (1 - p_{22}) (1 - t_{22})) (-dd_2 + (1 - p_{22}) t_{22} + \\
& m_2 (-dd_1 + dd_2 + (1 - p_{12}) t_{12} - (1 - p_{22}) t_{22})) (1 + \alpha_1) / \\
& (-dd_2 + p_{22} (1 - t_{22}) + (1 - p_{22}) t_{22} + p_{22} t_{22} + s_2 (-dd_2 + (1 - p_{22}) t_{22}) + \\
& s_2 (dd_2 + p_{22} t_{22}) + (-dd_2 + p_{22} (1 - t_{22})) \alpha_1 + \\
& (dd_2 + (1 - p_{22}) (1 - t_{22})) (1 + \alpha_1) + \\
& m_2 (-dd_1 + p_{12} (1 - t_{12}) + (1 - p_{12}) t_{12} + p_{12} t_{12} + s_2 (-dd_1 + (1 - p_{12}) t_{12}) + \\
& s_2 (dd_1 + p_{12} t_{12}) - (1 - p_{22}) (1 - t_{22}) - p_{22} (1 - t_{22}) - (1 - p_{22}) \\
& t_{22} - p_{22} t_{22} - s_2 (-dd_2 + (1 - p_{22}) t_{22}) - s_2 (dd_2 + p_{22} t_{22}) + \\
& (-dd_1 + p_{12} (1 - t_{12})) \alpha_1 - (dd_2 + (1 - p_{22}) (1 - t_{22})) \alpha_1 - \\
& (-dd_2 + p_{22} (1 - t_{22})) \alpha_1 + (dd_1 + (1 - p_{12}) (1 - t_{12})) (1 + \alpha_1) + \\
& (r (1 + s_2) (-dd_2 + m_2 (-dd_1 + dd_2 + p_{12} (1 - t_{12}) - p_{22} (1 - t_{22})) + p_{22} (1 - t_{22})) \\
& (-dd_2 + (1 - p_{22}) t_{22} + m_2 (-dd_1 + dd_2 + (1 - p_{12}) t_{12} - (1 - p_{22}) t_{22})) \\
& (1 + \alpha_1) / (-dd_2 + p_{22} (1 - t_{22}) + (1 - p_{22}) t_{22} + \\
& p_{22} t_{22} + s_2 (-dd_2 + (1 - p_{22}) t_{22}) + s_2 (dd_2 + p_{22} t_{22}) + \\
& (-dd_2 + p_{22} (1 - t_{22})) \alpha_1 + (dd_2 + (1 - p_{22}) (1 - t_{22})) (1 + \alpha_1) + \\
& m_2 (-dd_1 + p_{12} (1 - t_{12}) + (1 - p_{12}) t_{12} + p_{12} t_{12} + s_2 (-dd_1 + (1 - p_{12}) t_{12}) + \\
& s_2 (dd_1 + p_{12} t_{12}) - (1 - p_{22}) (1 - t_{22}) - p_{22} (1 - t_{22}) - (1 - p_{22}) \\
& t_{22} - p_{22} t_{22} - s_2 (-dd_2 + (1 - p_{22}) t_{22}) - s_2 (dd_2 + p_{22} t_{22}) + \\
& (-dd_1 + p_{12} (1 - t_{12})) \alpha_1 - (dd_2 + (1 - p_{22}) (1 - t_{22})) \alpha_1 - \\
& (-dd_2 + p_{22} (1 - t_{22})) \alpha_1 + (dd_1 + (1 - p_{12}) (1 - t_{12})) (1 + \alpha_1) + \\
& ((dd_2 + m_2 (dd_1 - dd_2 + (1 - p_{12}) (1 - t_{12}) - (1 - p_{22}) (1 - t_{22})) + \\
& (1 - p_{22}) (1 - t_{22})) \\
& (-dd_2 + m_2 (-dd_1 + dd_2 + p_{12} (1 - t_{12}) - p_{22} (1 - t_{22})) + p_{22} (1 - t_{22})) / \\
& ((1 - p_{22}) (1 - t_{22}) + p_{22} (1 - t_{22}) + (1 - p_{22}) t_{22} + p_{22} t_{22} + \\
& s_2 (-dd_2 + (1 - p_{22}) t_{22}) + s_2 (dd_2 + p_{22} t_{22}) + (-dd_2 + (1 - p_{22}) t_{22}) \alpha_2 + \\
& s_2 (-dd_2 + (1 - p_{22}) t_{22}) \alpha_2 + (dd_2 + p_{22} t_{22}) \alpha_2 + s_2 (dd_2 + p_{22} t_{22}) \alpha_2 + \\
& m_2 (dd_1 + (1 - p_{12}) (1 - t_{12}) + p_{12} (1 - t_{12}) + p_{12} t_{12} + s_2 \\
& (dd_1 + p_{12} t_{12}) - (1 - p_{22}) (1 - t_{22}) - p_{22} (1 - t_{22}) - (1 - p_{22}) \\
& t_{22} - p_{22} t_{22} - s_2 (-dd_2 + (1 - p_{22}) t_{22}) - s_2 (dd_2 + p_{22} t_{22}) + \\
& (dd_1 + p_{12} t_{12}) \alpha_2 + s_2 (dd_1 + p_{12} t_{12}) \alpha_2 - (-dd_2 + (1 - p_{22}) t_{22}) \\
& \alpha_2 - s_2 (-dd_2 + (1 - p_{22}) t_{22}) \alpha_2 - (dd_2 + p_{22} t_{22}) \alpha_2 - s_2 \\
& (dd_2 + p_{22} t_{22}) \alpha_2 + (1 + s_2) (-dd_1 + (1 - p_{12}) t_{12}) (1 + \alpha_2) + \\
& ((-1 + r) (1 + s_2) (dd_2 + m_2 (dd_1 - dd_2 + (1 - p_{12}) (1 - t_{12}) - (1 - p_{22}) (1 - t_{22})) + \\
& (1 - p_{22}) (1 - t_{22})) (dd_2 + p_{22} t_{22} + m_2 (dd_1 - dd_2 + p_{12} t_{12} - p_{22} t_{22})) / \\
& ((1 - p_{22}) (1 - t_{22}) + p_{22} (1 - t_{22}) + (1 - p_{22}) t_{22} + p_{22} t_{22} + \\
& s_2 (-dd_2 + (1 - p_{22}) t_{22}) + s_2 (dd_2 + p_{22} t_{22}) + (-dd_2 + (1 - p_{22}) t_{22}) \alpha_2 + \\
& s_2 (-dd_2 + (1 - p_{22}) t_{22}) \alpha_2 + (dd_2 + p_{22} t_{22}) \alpha_2 + s_2 (dd_2 + p_{22} t_{22}) \alpha_2 + \\
& m_2 (dd_1 + (1 - p_{12}) (1 - t_{12}) + p_{12} (1 - t_{12}) + p_{12} t_{12} + s_2 \\
& (dd_1 + p_{12} t_{12}) - (1 - p_{22}) (1 - t_{22}) - p_{22} (1 - t_{22}) - (1 - p_{22})
\end{aligned}$$

$$\begin{aligned}
& t22 - p22 t22 - s2 (-dd2 + (1 - p22) t22) - s2 (dd2 + p22 t22) + \\
& (dd1 + p12 t12) \alpha2 + s2 (dd1 + p12 t12) \alpha2 - (-dd2 + (1 - p22) t22) \\
& \alpha2 - s2 (-dd2 + (1 - p22) t22) \alpha2 - (dd2 + p22 t22) \alpha2 - s2 \\
& (dd2 + p22 t22) \alpha2 + (1 + s2) (-dd1 + (1 - p12) t12) (1 + \alpha2) + \\
& (r (1 + s2) (-dd2 + m2 (-dd1 + dd2 + p12 (1 - t12) - p22 (1 - t22)) + p22 (1 - t22)) \\
& (-dd2 + (1 - p22) t22 + m2 (-dd1 + dd2 + (1 - p12) t12 - (1 - p22) t22)) \\
& (1 + \alpha2)) / ((1 - p22) (1 - t22) + p22 (1 - t22) + (1 - p22) t22 + p22 t22 + \\
& s2 (-dd2 + (1 - p22) t22) + s2 (dd2 + p22 t22) + (-dd2 + (1 - p22) t22) \alpha2 + \\
& s2 (-dd2 + (1 - p22) t22) \alpha2 + (dd2 + p22 t22) \alpha2 + s2 (dd2 + p22 t22) \alpha2 + \\
& m2 (dd1 + (1 - p12) (1 - t12) + p12 (1 - t12) + p12 t12 + s2 \\
& (dd1 + p12 t12) - (1 - p22) (1 - t22) - p22 (1 - t22) - (1 - p22) \\
& t22 - p22 t22 - s2 (-dd2 + (1 - p22) t22) - s2 (dd2 + p22 t22) + \\
& (dd1 + p12 t12) \alpha2 + s2 (dd1 + p12 t12) \alpha2 - (-dd2 + (1 - p22) t22) \\
& \alpha2 - s2 (-dd2 + (1 - p22) t22) \alpha2 - (dd2 + p22 t22) \alpha2 - s2 \\
& (dd2 + p22 t22) \alpha2 + (1 + s2) (-dd1 + (1 - p12) t12) (1 + \alpha2) + \\
& (-(((-1 + r) (dd2 + m2 (dd1 - dd2 + (1 - p12) (1 - t12) - (1 - p22) (1 - t22)) + \\
& (1 - p22) (1 - t22)) (dd2 + p22 t22 + m2 (dd1 - dd2 + p12 t12 - p22 t22))) / \\
& (-dd2 + p22 (1 - t22) + (1 - p22) t22 + p22 t22 + s2 (-dd2 + (1 - p22) t22) + \\
& s2 (dd2 + p22 t22) + (-dd2 + p22 (1 - t22)) \alpha1 + (dd2 + (1 - p22) (1 - t22)) \\
& (1 + \alpha1) + m2 (-dd1 + p12 (1 - t12) + (1 - p12) t12 + p12 t12 + \\
& s2 (-dd1 + (1 - p12) t12) + s2 (dd1 + p12 t12) - (1 - p22) (1 - t22) - \\
& p22 (1 - t22) - (1 - p22) t22 - p22 t22 - s2 (-dd2 + (1 - p22) t22) - s2 \\
& (dd2 + p22 t22) + (-dd1 + p12 (1 - t12)) \alpha1 - (dd2 + (1 - p22) (1 - t22)) \\
& \alpha1 - (-dd2 + p22 (1 - t22)) \alpha1 + (dd1 + (1 - p12) (1 - t12)) (1 + \alpha1))) + \\
& ((1 + s2) (-dd2 + (1 - p22) t22 + m2 (-dd1 + dd2 + (1 - p12) t12 - (1 - p22) t22)) \\
& (dd2 + p22 t22 + m2 (dd1 - dd2 + p12 t12 - p22 t22))) / \\
& (-dd2 + p22 (1 - t22) + (1 - p22) t22 + p22 t22 + s2 (-dd2 + (1 - p22) t22) + \\
& s2 (dd2 + p22 t22) + (-dd2 + p22 (1 - t22)) \alpha1 + \\
& (dd2 + (1 - p22) (1 - t22)) (1 + \alpha1) + \\
& m2 (-dd1 + p12 (1 - t12) + (1 - p12) t12 + p12 t12 + s2 (-dd1 + (1 - p12) t12) + \\
& s2 (dd1 + p12 t12) - (1 - p22) (1 - t22) - p22 (1 - t22) - (1 - p22) \\
& t22 - p22 t22 - s2 (-dd2 + (1 - p22) t22) - s2 (dd2 + p22 t22) + \\
& (-dd1 + p12 (1 - t12)) \alpha1 - (dd2 + (1 - p22) (1 - t22)) \alpha1 - \\
& (-dd2 + p22 (1 - t22)) \alpha1 + (dd1 + (1 - p12) (1 - t12)) (1 + \alpha1)) + \\
& (r (-dd2 + m2 (-dd1 + dd2 + p12 (1 - t12) - p22 (1 - t22)) + p22 (1 - t22)) \\
& (-dd2 + (1 - p22) t22 + m2 (-dd1 + dd2 + (1 - p12) t12 - (1 - p22) t22)) \\
& (1 + \alpha1)) / (-dd2 + p22 (1 - t22) + (1 - p22) t22 + \\
& p22 t22 + s2 (-dd2 + (1 - p22) t22) + s2 (dd2 + p22 t22) + \\
& (-dd2 + p22 (1 - t22)) \alpha1 + (dd2 + (1 - p22) (1 - t22)) (1 + \alpha1) + \\
& m2 (-dd1 + p12 (1 - t12) + (1 - p12) t12 + p12 t12 + s2 (-dd1 + (1 - p12) t12) + \\
& s2 (dd1 + p12 t12) - (1 - p22) (1 - t22) - p22 (1 - t22) - (1 - p22) \\
& t22 - p22 t22 - s2 (-dd2 + (1 - p22) t22) - s2 (dd2 + p22 t22) + \\
& (-dd1 + p12 (1 - t12)) \alpha1 - (dd2 + (1 - p22) (1 - t22)) \alpha1 - \\
& (-dd2 + p22 (1 - t22)) \alpha1 + (dd1 + (1 - p12) (1 - t12)) (1 + \alpha1)) - \\
& ((-1 + r) (dd2 + m2 (dd1 - dd2 + (1 - p12) (1 - t12) - (1 - p22) (1 - t22)) + \\
& (1 - p22) (1 - t22)) (dd2 + p22 t22 + m2 (dd1 - dd2 + p12 t12 - p22 t22))) / \\
& ((1 - p22) (1 - t22) + p22 (1 - t22) + (1 - p22) t22 + p22 t22 + \\
& s2 (-dd2 + (1 - p22) t22) + s2 (dd2 + p22 t22) + (-dd2 + (1 - p22) t22) \alpha2 + \\
& s2 (-dd2 + (1 - p22) t22) \alpha2 + (dd2 + p22 t22) \alpha2 + s2 (dd2 + p22 t22) \alpha2 + \\
& m2 (dd1 + (1 - p12) (1 - t12) + p12 (1 - t12) + p12 t12 + s2
\end{aligned}$$



[illegible]

$$\frac{\begin{aligned} &((1 - p_{22})(1 - t_{22}) + p_{22}(1 - t_{22}) + (1 - p_{22})t_{22} + p_{22}t_{22} + \\ &s_2(-dd_2 + (1 - p_{22})t_{22}) + s_2(dd_2 + p_{22}t_{22}) + (-dd_2 + (1 - p_{22})t_{22})\alpha_2 + \\ &s_2(-dd_2 + (1 - p_{22})t_{22})\alpha_2 + (dd_2 + p_{22}t_{22})\alpha_2 + s_2(dd_2 + p_{22}t_{22})\alpha_2 + \\ &m_2(dd_1 + (1 - p_{12})(1 - t_{12}) + p_{12}(1 - t_{12}) + p_{12}t_{12} + s_2 \\ &(dd_1 + p_{12}t_{12}) - (1 - p_{22})(1 - t_{22}) - p_{22}(1 - t_{22}) - (1 - p_{22}) \\ &t_{22} - p_{22}t_{22} - s_2(-dd_2 + (1 - p_{22})t_{22}) - s_2(dd_2 + p_{22}t_{22}) + \\ &(dd_1 + p_{12}t_{12})\alpha_2 + s_2(dd_1 + p_{12}t_{12})\alpha_2 - (-dd_2 + (1 - p_{22})t_{22}) \\ &\alpha_2 - s_2(-dd_2 + (1 - p_{22})t_{22})\alpha_2 - (dd_2 + p_{22}t_{22})\alpha_2 - s_2 \\ &(dd_2 + p_{22}t_{22})\alpha_2 + (1 + s_2)(-dd_1 + (1 - p_{12})t_{12})(1 + \alpha_2))) \end{aligned}}{4(1 + s_2((1 - p_{22})t_{22} + p_{22}t_{22} + m_2((1 - p_{12})t_{12} + p_{12}t_{12} - (1 - p_{22})t_{22} - p_{22}t_{22})))^4)};$$

```
itgen[.1, .2, 3, 3.5, .1, .1, .5][{.8, .5, .05, .6, .9, .04}]
{0.790576, 0.602846, 0.0474188, 0.621487, 0.865297, 0.0358771}
```

### 1.2.3 Computing the equilibrium from itgen using FindRoot

```
Fritgen[s1_, s2_, α1_, α2_, m1_, m2_, r_] [
  {fp12_, ft12_, fdd1_, fp22_, ft22_, fdd2_}] :=
  FindRoot[itgen[s1, s2, α1, α2, m1, m2, r][{p12, t12, dd1, p22, t22, dd2}] ==
    {p12, t12, dd1, p22, t22, dd2},
    {{p12, fp12}, {t12, ft12}, {dd1, fdd1}, {p22, fp22}, {t22, ft22}, {dd2, fdd2}}]
```

```
testdif[n_][x_, y_] := If[Max[Abs[x - y]] < 10.^(-n), False, True]
```

Because there exists a curve of equilibria, the above procedure is of limited use and sometimes has convergence problems

## ■ 2. Analysis

Under the assumption of symmetry of the two populations, this models was analyzed in Servedio and Bürger (2014)

## 2.1 Equilibria with fixation of one allele

It is easy to show that if  $dd_1 = dd_2 = 0$  and  $p_{12} = p_{22}$ , then only  $t_{12} = t_{22} = 0$  and  $t_{12} = t_{22} = 1$  are possible equilibria

### 2.1.1 Determination of equilibria

Assume  $t_{12} = t_{22} = 0$  (loss of trait allele T2)

```
Simplify[itgen[s1, s2, α1, α2, m1, m2, r][{p12, 0, 0, p22, 0, 0}] - {p12, 0, 0, p22, 0, 0}]
{m1(-p12 + p22), 0, 0, m2(p12 - p22), 0, 0}
```

If  $m_1 > 0$  or  $m_2 > 0$ , then all equilibria on this edge satisfy  $p_{12} = p_{22}$  (and  $dd_1=dd_2=0$ ).

Assume  $t_{12} = t_{22} = 1$

**Simplify**[**itgen**[ $s_1, s_2, \alpha_1, \alpha_2, m_1, m_2, r$ ][ $\{p_{12}, 1, 0, p_{22}, 1, 0\} - \{p_{12}, 1, 0, p_{22}, 1, 0\}$ ]  
 $\{m_1 (-p_{12} + p_{22}), 0, 0, m_2 (p_{12} - p_{22}), 0, 0\}$

If  $m_1 > 0$  or  $m_2 > 0$ , then all equilibria on this edge satisfy  $p_{12} = p_{22}$  (and  $dd_1=dd_2=0$ ).

Assume  $p_{12} = p_{22} = 0$

**Factor**[**itgen**[ $s_1, s_2, \alpha_1, \alpha_2, m_1, m_2, r$ ][ $\{0, t_{12}, 0, 0, t_{22}, 0\} - \{0, t_{12}, 0, 0, t_{22}, 0\}$ ]

$\{0, - ( (2 m_1 t_{12} + 2 s_1 t_{12} + 2 m_1 s_1 t_{12} + 2 s_1^2 t_{12} - 2 s_1 t_{12}^2 + 2 m_1^2 s_1 t_{12}^2 - 4 s_1^2 t_{12}^2 + 4 m_1 s_1^2 t_{12}^2 + 2 s_1^2 t_{12}^3 - 4 m_1 s_1^2 t_{12}^3 + 2 m_1^2 s_1^2 t_{12}^3 - 2 m_1 t_{22} - 2 m_1 s_1 t_{22} - 4 m_1^2 s_1 t_{12} t_{22} - 4 m_1 s_1^2 t_{12} t_{22} + 4 m_1 s_1^2 t_{12}^2 t_{22} - 4 m_1^2 s_1^2 t_{12}^2 t_{22} + 2 m_1^2 s_1 t_{22}^2 + 2 m_1^2 s_1^2 t_{12} t_{22}^2 + t_{12} \alpha_1 + m_1 t_{12} \alpha_1 + 3 s_1 t_{12} \alpha_1 + m_1 s_1 t_{12} \alpha_1 + 2 s_1^2 t_{12} \alpha_1 - t_{12}^2 \alpha_1 + m_1^2 t_{12}^2 \alpha_1 - 5 s_1 t_{12}^2 \alpha_1 + 4 m_1 s_1 t_{12}^2 \alpha_1 + m_1^2 s_1 t_{12}^2 \alpha_1 - 4 s_1^2 t_{12}^2 \alpha_1 + 4 m_1 s_1^2 t_{12}^2 \alpha_1 + 2 s_1 t_{12}^3 \alpha_1 - 4 m_1 s_1 t_{12}^3 \alpha_1 + 2 m_1^2 s_1 t_{12}^3 \alpha_1 + 2 s_1^2 t_{12}^3 \alpha_1 - 4 m_1 s_1^2 t_{12}^3 \alpha_1 + 2 m_1^2 s_1^2 t_{12}^3 \alpha_1 - m_1 t_{22} \alpha_1 - m_1 s_1 t_{22} \alpha_1 - 2 m_1^2 t_{12} t_{22} \alpha_1 - 4 m_1 s_1 t_{12} t_{22} \alpha_1 - 2 m_1^2 s_1 t_{12} t_{22} \alpha_1 - 4 m_1 s_1^2 t_{12} t_{22} \alpha_1 + 4 m_1 s_1 t_{12}^2 t_{22} \alpha_1 - 4 m_1^2 s_1 t_{12}^2 t_{22} \alpha_1 + 4 m_1 s_1^2 t_{12}^2 t_{22} \alpha_1 - 4 m_1^2 s_1^2 t_{12}^2 t_{22} \alpha_1 + m_1^2 t_{22}^2 \alpha_1 + m_1^2 s_1 t_{22}^2 \alpha_1 + 2 m_1^2 s_1 t_{12} t_{22}^2 \alpha_1 + 2 m_1^2 s_1^2 t_{12} t_{22}^2 \alpha_1) / (2 (1 + s_1 - s_1 t_{12} + m_1 s_1 t_{12} - m_1 s_1 t_{22}) (1 + s_1 - s_1 t_{12} + m_1 s_1 t_{12} - m_1 s_1 t_{22} + \alpha_1 + s_1 \alpha_1 - t_{12} \alpha_1 + m_1 t_{12} \alpha_1 - s_1 t_{12} \alpha_1 + m_1 s_1 t_{12} \alpha_1 - m_1 t_{22} \alpha_1 - m_1 s_1 t_{22} \alpha_1)) ), 0, 0, - ( (-2 m_2 t_{12} - 2 m_2 s_2 t_{12} - 2 m_2^2 s_2 t_{12}^2 - 2 m_2^2 s_2^2 t_{12}^2 + 2 m_2 t_{22} - 2 s_2 t_{22} + 2 m_2 s_2 t_{22} + 4 m_2^2 s_2 t_{12} t_{22} - 4 m_2 s_2^2 t_{12} t_{22} + 4 m_2^2 s_2^2 t_{12} t_{22} + 2 m_2^2 s_2^2 t_{12}^2 t_{22} + 2 s_2 t_{22}^2 - 2 m_2^2 s_2 t_{22}^2 - 2 s_2^2 t_{22}^2 + 4 m_2 s_2^2 t_{22}^2 - 2 m_2^2 s_2^2 t_{22}^2 + 4 m_2 s_2^2 t_{12} t_{22}^2 - 4 m_2^2 s_2^2 t_{12} t_{22}^2 + 2 s_2^2 t_{22}^3 - 4 m_2 s_2^2 t_{22}^3 + 2 m_2^2 s_2^2 t_{22}^3 - m_2 t_{12} \alpha_1 - m_2 s_2 t_{12} \alpha_1 + m_2^2 t_{12}^2 \alpha_1 + m_2^2 s_2 t_{12}^2 \alpha_1 + t_{22} \alpha_1 + m_2 t_{22} \alpha_1 - s_2 t_{22} \alpha_1 + m_2 s_2 t_{22} \alpha_1 - 2 m_2^2 t_{12} t_{22} \alpha_1 + 4 m_2 s_2 t_{12} t_{22} \alpha_1 - 2 m_2^2 s_2 t_{12} t_{22} \alpha_1 - 2 m_2^2 s_2 t_{12}^2 t_{22} \alpha_1 - t_{22}^2 \alpha_1 + m_2^2 t_{22}^2 \alpha_1 + 3 s_2 t_{22}^2 \alpha_1 - 4 m_2 s_2 t_{22}^2 \alpha_1 + m_2^2 s_2 t_{22}^2 \alpha_1 - 4 m_2 s_2 t_{12} t_{22}^2 \alpha_1 + 4 m_2^2 s_2 t_{12} t_{22}^2 \alpha_1 - 2 s_2 t_{22}^3 \alpha_1 + 4 m_2 s_2 t_{22}^3 \alpha_1 - 2 m_2^2 s_2 t_{22}^3 \alpha_1) / (2 (-1 - m_2 s_2 t_{12} - s_2 t_{22} + m_2 s_2 t_{22}) (-1 - m_2 s_2 t_{12} - s_2 t_{22} + m_2 s_2 t_{22} - \alpha_1 + m_2 t_{12} \alpha_1 + t_{22} \alpha_1 - m_2 t_{22} \alpha_1)) ), 0\}$

**Simplify**[**Numerator**[**Factor**[

**itgen**[ $s_1, s_2, \alpha_1, \alpha_2, m_1, m_2, r$ ][ $\{0, t_{12}, 0, 0, t_{22}, 0\} - \{0, t_{12}, 0, 0, t_{22}, 0\}$ ]]]

$\{0, -m_1^2 (t_{12} - t_{22})^2 (\alpha_1 + 2 s_1^2 t_{12} (1 + \alpha_1) + s_1 (2 + \alpha_1 + 2 t_{12} \alpha_1)) - (-1 + t_{12}) t_{12} (-\alpha_1 + 2 s_1^2 (-1 + t_{12}) (1 + \alpha_1) + s_1 (-2 + (-3 + 2 t_{12}) \alpha_1)) + m_1 (t_{12} - t_{22}) (-2 - \alpha_1 + 4 s_1^2 (-1 + t_{12}) t_{12} (1 + \alpha_1) + s_1 (-2 + (-1 - 4 t_{12} + 4 t_{12}^2) \alpha_1)), 0, 0, -m_2 (t_{12} - t_{22}) (-2 + 4 s_2^2 (-1 + t_{22}) t_{22} - \alpha_1 - s_2 (2 + (1 - 2 t_{22})^2 \alpha_1)) - m_2^2 (t_{12} - t_{22})^2 (2 s_2^2 (-1 + t_{22}) + \alpha_1 + s_2 (-2 + \alpha_1 - 2 t_{22} \alpha_1)) - (-1 + t_{22}) t_{22} (2 s_2^2 t_{22} - \alpha_1 + s_2 (2 + \alpha_1 - 2 t_{22} \alpha_1)), 0\}$

This is independent of  $\alpha_2$  (and of  $r$ , of course)!

The above may or may not have solutions. If  $\alpha_1$  is small, then it usually has (close to migration-selection balance). For large  $\alpha_1$ , there is typically no solution.

```

NSolve[{-m1^2 (t12 - t22)^2 (α1 + 2 s1^2 t12 (1 + α1) + s1 (2 + α1 + 2 t12 α1)) -
  (-1 + t12) t12 (-α1 + 2 s1^2 (-1 + t12) (1 + α1) + s1 (-2 + (-3 + 2 t12) α1)) +
  m1 (t12 - t22) (-2 - α1 + 4 s1^2 (-1 + t12) t12 (1 + α1) + s1 (-2 + (-1 - 4 t12 + 4 t12^2) α1)),
  -m2 (t12 - t22) (-2 + 4 s2^2 (-1 + t22) t22 - α1 - s2 (2 + (1 - 2 t22)^2 α1)) -
  m2^2 (t12 - t22)^2 (2 s2^2 (-1 + t22) + α1 + s2 (-2 + α1 - 2 t22 α1)) -
  (-1 + t22) t22 (2 s2^2 t22 - α1 + s2 (2 + α1 - 2 t22 α1))} /.
{s1 → 0.2, s2 → 0.2, m1 → 0.01, m2 → 0.01, α1 → 0.4}, {t12, t22}]
{{t12 → 4.29625, t22 → -0.67648}, {t12 → 4.27168 + 0.0098123 i, t22 → 1.30515 - 0.790794 i},
{t12 → 4.27168 - 0.0098123 i, t22 → 1.30515 + 0.790794 i},
{t12 → 1.04237, t22 → -0.293469}, {t12 → 0.0413652, t22 → 1.6079}, {t12 → 1., t22 → 1.},
{t12 → 0.0101669, t22 → 0.411472}, {t12 → 0.989981, t22 → 1.29379}, {t12 → 0., t22 → 0.}}

```

```

NSolve[{-m1^2 (t12 - t22)^2 (α1 + 2 s1^2 t12 (1 + α1) + s1 (2 + α1 + 2 t12 α1)) -
  (-1 + t12) t12 (-α1 + 2 s1^2 (-1 + t12) (1 + α1) + s1 (-2 + (-3 + 2 t12) α1)) +
  m1 (t12 - t22) (-2 - α1 + 4 s1^2 (-1 + t12) t12 (1 + α1) + s1 (-2 + (-1 - 4 t12 + 4 t12^2) α1)),
  -m2 (t12 - t22) (-2 + 4 s2^2 (-1 + t22) t22 - α1 - s2 (2 + (1 - 2 t22)^2 α1)) -
  m2^2 (t12 - t22)^2 (2 s2^2 (-1 + t22) + α1 + s2 (-2 + α1 - 2 t22 α1)) -
  (-1 + t22) t22 (2 s2^2 t22 - α1 + s2 (2 + α1 - 2 t22 α1))} /.
{s1 → 0.2, s2 → 0.2, m1 → 0.01, m2 → 0.01, α1 → 0.5}, {t12, t22}]
{{t12 → 4.18932, t22 → -0.872673},
{t12 → 4.16661 + 0.00833685 i, t22 → 0.894128 - 0.648105 i},
{t12 → 4.16661 - 0.00833685 i, t22 → 0.894128 + 0.648105 i},
{t12 → 1.04553, t22 → -0.523105}, {t12 → 0.0277905, t22 → 1.20646},
{t12 → 1.01521, t22 → 0.502458}, {t12 → 1., t22 → 1.},
{t12 → -0.00456512, t22 → -0.206632}, {t12 → 0., t22 → 0.}}

```

```

NSolve[{-m1^2 (t12 - t22)^2 (α1 + 2 s1^2 t12 (1 + α1) + s1 (2 + α1 + 2 t12 α1)) -
  (-1 + t12) t12 (-α1 + 2 s1^2 (-1 + t12) (1 + α1) + s1 (-2 + (-3 + 2 t12) α1)) +
  m1 (t12 - t22) (-2 - α1 + 4 s1^2 (-1 + t12) t12 (1 + α1) + s1 (-2 + (-1 - 4 t12 + 4 t12^2) α1)),
  -m2 (t12 - t22) (-2 + 4 s2^2 (-1 + t22) t22 - α1 - s2 (2 + (1 - 2 t22)^2 α1)) -
  m2^2 (t12 - t22)^2 (2 s2^2 (-1 + t22) + α1 + s2 (-2 + α1 - 2 t22 α1)) -
  (-1 + t22) t22 (2 s2^2 t22 - α1 + s2 (2 + α1 - 2 t22 α1))} /.
{s1 → 0.2, s2 → 0.2, m1 → 0.01, m2 → 0.01, α1 → 100}, {t12, t22}]

```

```

NSolve[{-m1^2 (t12 - t22)^2 (α1 + 2 s1^2 t12 (1 + α1) + s1 (2 + α1 + 2 t12 α1)) -
  (-1 + t12) t12 (-α1 + 2 s1^2 (-1 + t12) (1 + α1) + s1 (-2 + (-3 + 2 t12) α1)) +
  m1 (t12 - t22) (-2 - α1 + 4 s1^2 (-1 + t12) t12 (1 + α1) + s1 (-2 + (-1 - 4 t12 + 4 t12^2) α1)),
  -m2 (t12 - t22) (-2 + 4 s2^2 (-1 + t22) t22 - α1 - s2 (2 + (1 - 2 t22)^2 α1)) -
  m2^2 (t12 - t22)^2 (2 s2^2 (-1 + t22) + α1 + s2 (-2 + α1 - 2 t22 α1)) -
  (-1 + t22) t22 (2 s2^2 t22 - α1 + s2 (2 + α1 - 2 t22 α1))} /.
{s1 → 0.2, s2 → 0.2, m1 → 0.01, m2 → 0.01, α1 → 10000}, {t12, t22}]
{{t12 → 3.59725, t22 → -2.13778}, {t12 → 3.55978, t22 → 0.0504928},
{t12 → 3.54386, t22 → 0.974298}, {t12 → 1.03107, t22 → -2.07591},
{t12 → -0.0144, t22 → -2.05009}, {t12 → 1.00995, t22 → 0.0147497},
{t12 → 0.00719977, t22 → 1.01003}, {t12 → 1., t22 → 1.}, {t12 → 0., t22 → 0.}}

```

Assume  $p_{12} = p_{22} = 1$

Analogous to the case  $p_{12} = p_{22} = 0$

## 2.1.2 Jacobians and stability of equilibria, where one trait allele is fixed

Jacobian at edge  $t12 = t22 = 0$

```
Jacobdt20 =
  Simplify[D[itgen[s1, s2, α1, α2, m1, m2, r][{p12, t12, dd1, p22, t22, dd2}], {{p12,
    t12, dd1, p22, t22, dd2}}] /. {t12 → 0, dd1 → 0, t22 → 0, dd2 → 0, p12 → p22}];
```

An equilibrium is stable if the modulus of eigenvalues of its Jacobian is  $< 1$

**TableForm**[**Jacobdt20**]

|          |                                                                                             |                                                                                                                            |     |
|----------|---------------------------------------------------------------------------------------------|----------------------------------------------------------------------------------------------------------------------------|-----|
| $1 - m1$ | $0$                                                                                         | $\frac{(-1+m1) (2 s1 (1+\alpha1) - p22 \alpha2 - \alpha1 (-1+p22+p22 \alpha2))}{2 (1+s1) (1+\alpha1)}$                     | $n$ |
| $0$      | $-\frac{(-1+m1) (2+p22 \alpha2 + \alpha1 (1+p22+p22 \alpha2))}{2 (1+s1) (1+\alpha1)}$       | $0$                                                                                                                        | $e$ |
| $0$      | $\frac{(-1+m1) (-1+p22) p22 r (\alpha1 + \alpha2 + \alpha1 \alpha2)}{2 (1+s1) (1+\alpha1)}$ | $\frac{(-1+m1) (-1+r) (2+p22 \alpha2 + \alpha1 (1+p22+p22 \alpha2))}{2 (1+s1) (1+\alpha1)}$                                | $e$ |
| $m2$     | $0$                                                                                         | $\frac{m2 (p22 \alpha2 + \alpha1 (-1+p22+p22 \alpha2) + s2 (2+p22 \alpha2 + \alpha1 (1+p22+p22 \alpha2)))}{2 (1+\alpha1)}$ | $1$ |
| $0$      | $\frac{m2 (1+s2) (2+p22 \alpha2 + \alpha1 (1+p22+p22 \alpha2))}{2 (1+\alpha1)}$             | $0$                                                                                                                        | $e$ |
| $0$      | $-\frac{m2 (-1+p22) p22 r (1+s2) (\alpha1 + \alpha2 + \alpha1 \alpha2)}{2 (1+\alpha1)}$     | $-\frac{m2 (-1+r) (1+s2) (2+p22 \alpha2 + \alpha1 (1+p22+p22 \alpha2))}{2 (1+\alpha1)}$                                    | $e$ |

Characteristic polynomial at this equilibrium:

**cpolgenT20 = Simplify**[**Det**[**Jacobdt20** - **x IdentityMatrix**[6]]]

$$\frac{1}{16 (1+s1)^2 (1+\alpha1)^4} \left( (-1+x) (-1+m1+m2+x) \left( -m1 m2 (1+s2) (2+p22 \alpha2 + \alpha1 (1+p22+p22 \alpha2))^2 + (-2-\alpha1 - p22 \alpha1 + 2 (1+s1) x (1+\alpha1) - p22 \alpha2 - p22 \alpha1 \alpha2 + m1 (2+p22 \alpha2 + \alpha1 (1+p22+p22 \alpha2))) \right) \right. \\ \left. (-2+2x-\alpha1-p22 \alpha1 + 2x\alpha1 - p22 \alpha2 - p22 \alpha1 \alpha2 - s2 (2+\alpha1+p22 \alpha1 + p22 \alpha2 + p22 \alpha1 \alpha2) + m2 (1+s2) (2+p22 \alpha2 + \alpha1 (1+p22+p22 \alpha2))) \right) \\ \left( -m1 m2 (-1+r)^2 (1+s2) (2+p22 \alpha2 + \alpha1 (1+p22+p22 \alpha2))^2 + \right. \\ \left( 2-2x-2s1x+\alpha1+p22 \alpha1 - 2x\alpha1 - 2s1x\alpha1 + p22 \alpha2 + p22 \alpha1 \alpha2 - r (2+\alpha1+p22 \alpha1 + p22 \alpha2 + p22 \alpha1 \alpha2) + m1 (-1+r) (2+p22 \alpha2 + \alpha1 (1+p22+p22 \alpha2)) \right) \\ \left. (2+2s2-2x+\alpha1+p22 \alpha1 + s2 \alpha1 + p22 s2 \alpha1 - 2x\alpha1 + p22 \alpha2 + p22 s2 \alpha2 + p22 \alpha1 \alpha2 + p22 s2 \alpha1 \alpha2 + m2 (-1+r) (1+s2) (2+p22 \alpha2 + \alpha1 (1+p22+p22 \alpha2)) - r (1+s2) (2+p22 \alpha2 + \alpha1 (1+p22+p22 \alpha2))) \right)$$

There are four factors;  $x = 1$  and  $x = 1 - m1 - m2$  are always eigenvalues.

In addition, there is one factor without  $r$ , and one factor with  $r$ . Both factors are quadratic in  $x$  and given below:

```
cpolgenT20noR[x_, p22_] :=
  (-m1 m2 (1+s2) (2+p22 α2 + α1 (1+p22+p22 α2))^2 + (-2-α1-p22 α1 +
    2 (1+s1) x (1+α1) - p22 α2 - p22 α1 α2 + m1 (2+p22 α2 + α1 (1+p22+p22 α2))) (-2+
    2 x - α1 - p22 α1 + 2 x α1 - p22 α2 - p22 α1 α2 - s2 (2+α1+p22 α1 + p22 α2 + p22 α1 α2) +
    m2 (1+s2) (2+p22 α2 + α1 (1+p22+p22 α2))))
```

**Simplify[Series[cpolgenT20noR[x, p22], {x, 0, 3}]]**

$$-(-1+m1+m2)(1+s2)(2+p22\alpha2+\alpha1(1+p22+p22\alpha2))^2 + \\ 2(-2+m1-s1-s2-s1s2+m2(1+s1)(1+s2))(1+\alpha1)(2+p22\alpha2+\alpha1(1+p22+p22\alpha2))x + \\ 4(1+s1)(1+\alpha1)^2x^2 + O[x]^4$$

$$\text{cpolgenT20R}[x_, p22_] := (-m1m2(-1+r)^2(1+s2)(2+p22\alpha2+\alpha1(1+p22+p22\alpha2))^2 + \\ (2-2x-2s1x+\alpha1+p22\alpha1-2x\alpha1-2s1x\alpha1+p22\alpha2+p22\alpha1\alpha2 - \\ r(2+\alpha1+p22\alpha1+p22\alpha2+p22\alpha1\alpha2)+m1(-1+r)(2+p22\alpha2+\alpha1(1+p22+p22\alpha2))) \\ (2+2s2-2x+\alpha1+p22\alpha1+s2\alpha1+p22s2\alpha1-2x\alpha1+p22\alpha2+p22s2\alpha2 + \\ p22\alpha1\alpha2+p22s2\alpha1\alpha2+m2(-1+r)(1+s2)(2+p22\alpha2+\alpha1(1+p22+p22\alpha2)) - \\ r(1+s2)(2+p22\alpha2+\alpha1(1+p22+p22\alpha2))))$$

**Simplify[Series[cpolgenT20R[x, p22], {x, 0, 3}]]**

$$-(-1+m1+m2)(-1+r)^2(1+s2)(2+p22\alpha2+\alpha1(1+p22+p22\alpha2))^2 - \\ 2((-1+r)(-2+m1-s1-s2-s1s2+m2(1+s1)(1+s2)))(1+\alpha1) \\ (2+p22\alpha2+\alpha1(1+p22+p22\alpha2))x + 4(1+s1)(1+\alpha1)^2x^2 + O[x]^4$$

**Simplify[cpolgenT20R[x(1-r), p22] - (1-r)^2cpolgenT20noR[x, p22]]**

0

Therefore, the two polynomials cpolgenT20noR and cpolgenT20R (in x) have the same leading term, and it is positive.

Therefore, cpolgenT20noR[x,p22] = 0 if and only if cpolgenT20R[(1-r)x,p22] = 0. Hence, x is an eigenvalue resulting from cpolgenT20noR[x,p22] = 0 if and only if (1-r)x is an eigenvalue resulting from cpolgenT20R[x,p22] = 0.

As a consequence, an equilibrium p22 (=p12) at this edge (t12=t22=0, dd1=dd2=0) is unstable if and only if there exists an eigenvalue x>1 with cpolgenT20noR[x,p22] = 0.

Thus, a change of stability at this edge occurs at a point p22 if cpolgenT20noR[1,p22] = 0.

The curve of equilibria that connects the edges t12=t22=0 and t12=t22=1 has its endpoint at the value p22, at which the stability at this edge changes, i.e., where cpolgenT20noR[1,p22] = 0.

This is easily computed numerically.

Now, we show: The value of both polynomials at x = 0 is positive (and proportional); their derivatives at x=0 have the same sign, and they are negative!

**Factor[D[cpolgenT20noR[x, p22], {x, 1}] /. x -> 0]**

$$2(-2+m1+m2-s1+m2s1-s2+m2s2-s1s2+m2s1s2) \\ (1+\alpha1)(2+\alpha1+p22\alpha1+p22\alpha2+p22\alpha1\alpha2)$$

**Simplify**[**Reduce**[ $(-2 + m1 + m2 - s1 + m2 s1 - s2 + m2 s2 - s1 s2 + m2 s1 s2) < 0 \&\&$

$$- (1 - m2) < \frac{m1}{s1} - \frac{m2}{s2} < 1 - m1 \&\& s1 > 0 \&\& s2 > 0 \&\& 1 > m1 > 0 \&\& 1 > m2 > 0],$$

**Assumptions**  $\rightarrow \{s1 > 0, s2 > 0, 1 > m1 > 0, 1 > m2 > 0\}$ ]

$$\left( s2 < m2 + m2 s2 \&\& \frac{m1 s2}{m2 + s2 - m1 s2} < s1 < \frac{m1 s2}{m2 - s2 + m2 s2} \right) ||$$

$$(s2 \geq m2 + m2 s2 \&\& m2 s1 > (m1 - s1 + m1 s1) s2)$$

**Simplify**[**Reduce**[ $(-2 + m1 + m2 - s1 + m2 s1 - s2 + m2 s2 - s1 s2 + m2 s1 s2) > 0 \&\&$

$$- (1 - m2) < \frac{m1}{s1} - \frac{m2}{s2} < 1 - m1 \&\& s1 > 0 \&\& s2 > 0 \&\& 1 > m1 > 0 \&\& 1 > m2 > 0],$$

**Assumptions**  $\rightarrow \{s1 > 0, s2 > 0, 1 > m1 > 0, 1 > m2 > 0\}$ ]

False

**FindInstance**[ $(-2 + m1 + m2 - s1 + m2 s1 - s2 + m2 s2 - s1 s2 + m2 s1 s2) < 0 \&\&$

$$- (1 - m2) < \frac{m1}{s1} - \frac{m2}{s2} < 1 - m1 \&\& s1 > 0 \&\& s2 > 0 \&\& 1 > m1 > 0 \&\& 1 > m2 > 0, \{s1, s2, m1, m2\}]$$

$$\left\{ \left\{ s1 \rightarrow \frac{5}{16}, s2 \rightarrow \frac{1}{2}, m1 \rightarrow \frac{1}{4}, m2 \rightarrow \frac{1}{2} \right\} \right\}$$

## Stability of equilibria at the edge $t12 = t22 = 0$

By the above, the equilibrium  $p22$  at this edge is unstable if  $\text{cpolgenT20noR}[1, p22] < 0$ .

**Simplify**[**Series**[ $\text{cpolgenT20noR}[1, p22]$ ,  $\{p22, 0, 3\}$ ]]

$$\begin{aligned} & (-m1 m2 (1 + s2) (2 + \alpha1)^2 + \\ & (\alpha1 + 2 s1 (1 + \alpha1) + m1 (2 + \alpha1)) (\alpha1 - s2 (2 + \alpha1) + m2 (1 + s2) (2 + \alpha1)) - \\ & 2 ((m1 + s1 - s2 + s1 s2 + \alpha1 + s1 \alpha1 + s1 s2 \alpha1 + m1 s2 (2 + \alpha1) - m2 (1 + s2) (-1 + s1 + s1 \alpha1)) \\ & (\alpha1 + \alpha2 + \alpha1 \alpha2)) p22 - (-1 + m1 + m2) (1 + s2) (\alpha1 + \alpha2 + \alpha1 \alpha2)^2 p22^2 + 0[p22]^4 \end{aligned}$$

Stability of  $p22 = 0$ :

**FullSimplify**[ $\text{cpolgenT20noR}[1, 0]$ ]

$$m2 (1 + s2) (2 + \alpha1) (\alpha1 + 2 s1 (1 + \alpha1)) - (\alpha1 + 2 s1 (1 + \alpha1) + m1 (2 + \alpha1)) (-\alpha1 + s2 (2 + \alpha1))$$

This is positive if  $\alpha1 > 2 s2/(1 - s2)$ . Then

**Simplify**[**D**[ $\text{cpolgenT20noR}[x, 0]$ ,  $x$ ] /.  $x \rightarrow 1$ ]

$$2 (1 + \alpha1) (\alpha1 + 2 s1 (1 + \alpha1) + m1 (2 + \alpha1) + (1 + s1) (\alpha1 - s2 (2 + \alpha1) + m2 (1 + s2) (2 + \alpha1)))$$

is positive. Therefore,  $p22 = 0$  is stable because there are no zeros  $> 1$ .

A similar analysis yields stability conditions of  $p22 = 1$ .

## Complete symmetry of parameters and determination of the endpoints of the curve of equilibria for $r > 0$

By the above, it is sufficient to study  $\text{cpolgenT20noR}[x, p22]$

```
Simplify[Series[
  cpolgenT20noR[x, p22] /. {m2 → m, m1 → m, s1 → s, s2 → s, α1 → α, α2 → α}, {x, 0, 2}]]
- (-1 + 2 m) (1 + s) (2 + α)2 (1 + p22 α)2 +
  2 (-1 + m) (2 + 2 s + s2) (1 + p22 α) (2 + 3 α + α2) x + 4 (1 + s) (1 + α)2 x2 + O[x]3
```

```
cpolgenT20noRsym[p22_, x_, s_, α_, m_] := - (-1 + 2 m) (1 + s) (2 + α)2 (1 + p22 α)2 +
  2 (-1 + m) (2 + 2 s + s2) (1 + p22 α) (2 + 3 α + α2) x + 4 (1 + s) (1 + α)2 x2
```

Compute p22, where the eigenvalue is 1:

```
p22ev1noR = Simplify[Solve[cpolgenT20noRsym[p22, 1, s, α, m] == 0, p22],
  Assumptions → {0 < r < 1/2, α > 0, s > 0, m > s}]
```

```
{ {p22 → - ((2 m + 2 m s + s2 - √(s2 (2 + s)2 - 2 m s2 (2 + s)2 + m2 (2 + 2 s + s2)2)) +
  α + s α + s2 α - √(s2 (2 + s)2 - 2 m s2 (2 + s)2 + m2 (2 + 2 s + s2)2)) α -
  m s2 (1 + α)) / ((-1 + 2 m) (1 + s) α (2 + α)) },
  {p22 → - ((2 m + 2 m s + s2 + √(s2 (2 + s)2 - 2 m s2 (2 + s)2 + m2 (2 + 2 s + s2)2)) +
  α + s α + s2 α + √(s2 (2 + s)2 - 2 m s2 (2 + s)2 + m2 (2 + 2 s + s2)2)) α -
  m s2 (1 + α)) / ((-1 + 2 m) (1 + s) α (2 + α)) } }
```

```
N[{p22ev1noR /. {s → 0.2, α → 1, m → 0.01},
  p22ev1noR /. {s → 0.2, α → 10, m → 0.01}, p22ev1noR /. {s → 0.2, α → 100, m → 0.01}]]
{{ {p22 → 0.122074}, {p22 → 0.616701} },
  { {p22 → 0.0542852}, {p22 → 0.122296} }, { {p22 → 0.00666611}, {p22 → 0.0140128} } }
```

Stability of p22 = 0:

```
FullSimplify[cpolgenT20noRsym[0, 1, s, α, m]]
```

$$2(-1+m)s^2(1+\alpha)(2+\alpha) + \alpha(\alpha+2m(2+\alpha)) + s\alpha(\alpha+2m(2+\alpha))$$

This is always positive for m sufficiently close to 1

```
FullSimplify[cpolgenT20noRsym[0, 1, s, α, 0]]
```

$$-(\alpha+2s(1+\alpha))(-\alpha+s(2+\alpha))$$

This is positive if  $\alpha > \frac{2s}{1-s}$  and negative otherwise !

```
FullSimplify[cpolgenT20noRsym[0, 1, s, α, m] /. α -> \frac{2s}{1-s} (1+z)]
```

$$\frac{1}{(-1+s)^2} 4s(-(-1+s)sz(2+s+z+2sz) + m(1+sz)(2+3s+s^2+2(1+s+s^2)z))$$

This is positive whenever  $\alpha > \frac{2s}{1-s}$  (and  $s < 1$ )

```
FullSimplify[D[cpolgenT20noRsym[0, x, s, α, m], x] /. x → 1]
```

$$2(1+\alpha)(4(1+s)(1+\alpha) + (-1+m)(2+s(2+s))(2+\alpha))$$



$$\text{FullSimplify}\left[D[\text{cpolgenT20noRsym}[0, x, s, \alpha, m], x] /. x \rightarrow 1 /. \alpha \rightarrow \frac{2s}{1-s} (1+z)\right]$$

$$\frac{1}{(-1+s)^2} 4 (1+s+2sz) (m (2+s (2+s)) (1+sz) + s (s - (-2+s) sz + 2 (1+z)))$$

This is positive whenever  $s < 1$ .

Therefore,  $p_{22} = 0$  is stable if  $\alpha > \frac{2s}{1-s}$

In a similar way it can be shown that  $p_{22} = 1$  unstable, and stability changes exactly once between  $p_{22} = 0$  and  $p_{22} = 1$

The following computes the eigenvalue that determines stability of  $p_{22}$ :

```
EVsgenT20noRsym[p22_, s_, α_, m_] := x /. NSolve[cpolgenT20noRsym[p22, x, s, α, m] == 0, x]
```

```
EVsgenT20noRsym[0.1, 0.2, 10^0, 0.01]
```

```
{0.680398, 0.980327}
```

Plot region in which the maximum eigenvalue is less than 1 in modulus (implying stability of the edge equilibrium  $t_2 = 0, p_{22}, D = 0$ ). This region increases with increases  $m$ :

```
RegionPlot[{Abs[Max[EVsgenT20noRsym[p22, 0.2, 10^a, 0.01]]] < 1,
  Abs[Max[EVsgenT20noRsym[p22, 0.2, 10^a, 0.05]]] < 1},
{a, -2, 3}, {p22, 0, 0.2}, FrameLabel -> {"Log10(α)", "p22"}]
```

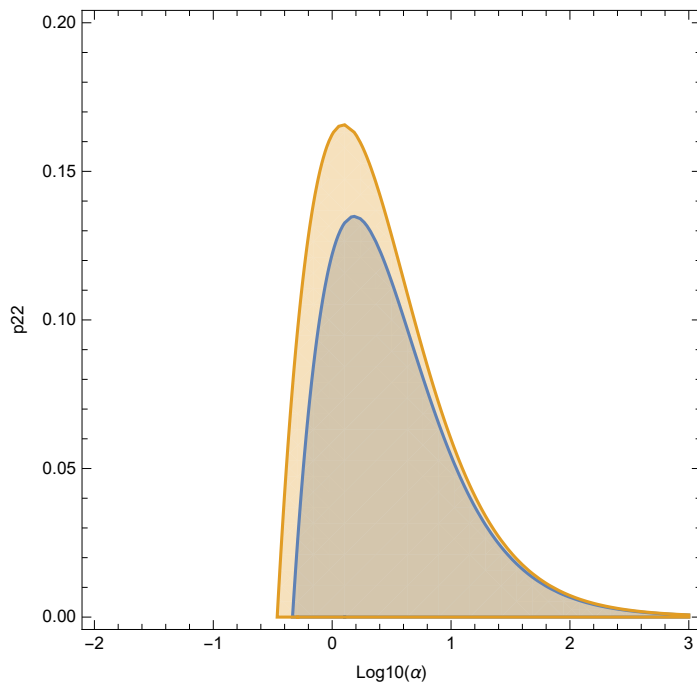

```
NSolve[cpolgenT20noRsym[p22, 1, 0.2, 1, 0.01] == 0, p22]
```

```
{{p22 -> 0.122074}, {p22 -> 0.616701}}
```

```
NSolve[cpolgenT20noRsym[p22, 1, 0.2, 10, 0.01] == 0, p22]
```

```
{{p22 -> 0.0542852}, {p22 -> 0.122296}}
```

```
NSolve[cpolgenT20noRsym[p22, 1, 0.2, 100, 0.01] == 0, p22]
```

```
{{p22 -> 0.00666611}, {p22 -> 0.0140128}}
```

Therefore, if {s -> 0.2,  $\alpha$  -> 1, m -> 0.01, r > 0}, then the equilibria with p22 < 0.122074 are stable.

Therefore, if {s -> 0.2,  $\alpha$  -> 10, m -> 0.01, r > 0}, then the equilibria with p22 < 0.0542852 are stable.

Therefore, if {s -> 0.2,  $\alpha$  -> 100, m -> 0.01, r > 0}, then the equilibria with p22 < 0.00666611 are stable.

## Jacobian at edge t12 = t22 = 1 and stability of edge equilibria

This analysis is analogous to that at t12 = t22 = 0

```
Jacobdt21 =
```

```
Simplify[D[itgen[s1, s2,  $\alpha$ 1,  $\alpha$ 2, m1, m2, r][{p12, t12, dd1, p22, t22, dd2}], {{p12, t12, dd1, p22, t22, dd2}}] /. {t12 -> 1, dd1 -> 0, t22 -> 1, dd2 -> 0, p12 -> p22}];
```

An equilibrium is stable if the modulus of eigenvalues of its Jacobian is < 1

```
TableForm[Jacobdt21]
```

|        |                                                                                     |                                                                                                           |
|--------|-------------------------------------------------------------------------------------|-----------------------------------------------------------------------------------------------------------|
| 1 - m1 | 0                                                                                   | $-\frac{(-1+m1)(p22\alpha2+(-1+p22)\alpha1(1+\alpha2)+s1(-2+(-2+p22)\alpha2+2(1+\alpha2))}{2(1+\alpha2)}$ |
| 0      | $\frac{(-1+m1)(1+s1)(-2+(-2+p22)\alpha2+(-1+p22)\alpha1(1+\alpha2))}{2(1+\alpha2)}$ | 0                                                                                                         |
| 0      | $-\frac{(-1+m1)(-1+p22)p22r(1+s1)(\alpha1+\alpha2+\alpha1\alpha2)}{2(1+\alpha2)}$   | $-\frac{(-1+m1)(-1+r)(1+s1)(-2+(-2+p22)\alpha2+(-1+p22)\alpha1(1+\alpha2))}{2(1+\alpha2)}$                |
| m2     | 0                                                                                   | $\frac{m2(p22\alpha2+2s2(1+\alpha2)+(-1+p22)\alpha1(1+\alpha2))}{2(1+s2)(1+\alpha2)}$                     |
| 0      | $-\frac{m2(-2+(-2+p22)\alpha2+(-1+p22)\alpha1(1+\alpha2))}{2(1+s2)(1+\alpha2)}$     | 0                                                                                                         |
| 0      | $\frac{m2(-1+p22)p22r(\alpha1+\alpha2+\alpha1\alpha2)}{2(1+s2)(1+\alpha2)}$         | $\frac{m2(-1+r)(-2+(-2+p22)\alpha2+(-1+p22)\alpha1(1+\alpha2))}{2(1+s2)(1+\alpha2)}$                      |

```
cpolgenT21 = Simplify[Det[Jacobdt21 - x IdentityMatrix[6]]]
```

$$\frac{1}{16(1+s2)^2(1+\alpha2)^4} \left( (-1+x)(-1+m1+m2+x) \left( -m1m2(1+s1)(-2+(-2+p22)\alpha2+(-1+p22)\alpha1(1+\alpha2))^2 + \right. \right. \\ \left( 2+\alpha1-p22\alpha1+2\alpha2-p22\alpha2+\alpha1\alpha2-p22\alpha1\alpha2-2(1+s2)x(1+\alpha2)+ \right. \\ \left. m2(-2+(-2+p22)\alpha2+(-1+p22)\alpha1(1+\alpha2)) \right) (2-2x+\alpha1-p22\alpha1+2\alpha2- \\ p22\alpha2-2x\alpha2+\alpha1\alpha2-p22\alpha1\alpha2+s1(2-(-2+p22)\alpha2-(-1+p22)\alpha1(1+\alpha2))) + \\ \left. m1(1+s1)(-2+(-2+p22)\alpha2+(-1+p22)\alpha1(1+\alpha2)) \right) \\ \left( -m1m2(-1+r)^2(1+s1)(-2+(-2+p22)\alpha2+(-1+p22)\alpha1(1+\alpha2))^2 + \right. \\ \left( -2+2x+2s2x-\alpha1+p22\alpha1-2\alpha2+p22\alpha2+2x\alpha2+2s2x\alpha2- \right. \\ \left. \alpha1\alpha2+p22\alpha1\alpha2+r(2-(-2+p22)\alpha2-(-1+p22)\alpha1(1+\alpha2)) + \right. \\ \left. m2(-1+r)(-2+(-2+p22)\alpha2+(-1+p22)\alpha1(1+\alpha2)) \right) \\ \left( -2-2s1+2x-\alpha1+p22\alpha1-s1\alpha1+p22s1\alpha1-2\alpha2+p22\alpha2-2s1\alpha2+ \right. \\ \left. p22s1\alpha2+2x\alpha2-\alpha1\alpha2+p22\alpha1\alpha2-s1\alpha1\alpha2+p22s1\alpha1\alpha2+ \right. \\ \left. m1(-1+r)(1+s1)(-2+(-2+p22)\alpha2+(-1+p22)\alpha1(1+\alpha2)) - \right. \\ \left. r(1+s1)(-2+(-2+p22)\alpha2+(-1+p22)\alpha1(1+\alpha2)) \right) \Bigg)$$

There are four factors; x = 1 and x = 1 - m1 - m2 are always eigenvalues;

in addition, there is one factor without r, and one factor with r (each of them quadratic)

```
cpolgenT21noR[x_, p22_] := (-m1 m2 (1 + s1) (-2 + (-2 + p22) α2 + (-1 + p22) α1 (1 + α2))2 +
  (2 + α1 - p22 α1 + 2 α2 - p22 α2 + α1 α2 - p22 α1 α2 - 2 (1 + s2) x (1 + α2) +
  m2 (-2 + (-2 + p22) α2 + (-1 + p22) α1 (1 + α2))) (2 - 2 x + α1 - p22 α1 + 2 α2 -
  p22 α2 - 2 x α2 + α1 α2 - p22 α1 α2 + s1 (2 - (-2 + p22) α2 - (-1 + p22) α1 (1 + α2))) +
  m1 (1 + s1) (-2 + (-2 + p22) α2 + (-1 + p22) α1 (1 + α2)))
```

```
Simplify[Series[cpolgenT21noR[x, p22], {x, 0, 3}]]
```

```
- (-1 + m1 + m2) (1 + s1) (-2 + (-2 + p22) α2 + (-1 + p22) α1 (1 + α2))2 -
  2 ((-2 + m2 - s1 - s2 - s1 s2 + m1 (1 + s1) (1 + s2)) (1 + α2)
  (-2 + (-2 + p22) α2 + (-1 + p22) α1 (1 + α2))) x + 4 (1 + s2) (1 + α2)2 x2 + O[x]4
```

```
cpolgenT21R[x_, p22_] :=
  (-m1 m2 (-1 + r)2 (1 + s1) (-2 + (-2 + p22) α2 + (-1 + p22) α1 (1 + α2))2 +
  (-2 + 2 x + 2 s2 x - α1 + p22 α1 - 2 α2 + p22 α2 + 2 x α2 + 2 s2 x α2 -
  α1 α2 + p22 α1 α2 + r (2 - (-2 + p22) α2 - (-1 + p22) α1 (1 + α2))) +
  m2 (-1 + r) (-2 + (-2 + p22) α2 + (-1 + p22) α1 (1 + α2)))
  (-2 - 2 s1 + 2 x - α1 + p22 α1 - s1 α1 + p22 s1 α1 - 2 α2 + p22 α2 - 2 s1 α2 +
  p22 s1 α2 + 2 x α2 - α1 α2 + p22 α1 α2 - s1 α1 α2 + p22 s1 α1 α2 +
  m1 (-1 + r) (1 + s1) (-2 + (-2 + p22) α2 + (-1 + p22) α1 (1 + α2))) -
  r (1 + s1) (-2 + (-2 + p22) α2 + (-1 + p22) α1 (1 + α2)))
```

```
Simplify[cpolgenT21R[x (1 - r), p22] - (1 - r)2 cpolgenT21noR[x, p22]]
```

```
0
```

We have  $(1-r)^2 \text{cpolgenT21noR}[x, p22] = \text{cpolgenT20R}[x, p22]$  and an analysis as above shows that stability at this edge changes at the value  $p22$  at which  $\text{cpolgenT21noR}[1, p22] = 0$ .

We have  $\text{cpolgenT21noR}[x, p22] = a_0 + a_1 x + a_2 x^2$ , where  $a_0 > 0$ ,  $a_1 < 0$ ,  $a_2 > 0$ .

We have  $\text{cpolgenT21R}[x, p22] = (1 - r)^2 a_0 + (1 - r) a_1 x + a_2 x^2$

## Complete symmetry of parameters and determination of the endpoints of the curve of equilibria for $r > 0$

```
Simplify[Series[
  cpolgenT21noR[x, p22] /. {s2 -> s1, s1 -> s, α2 -> α1, α1 -> α, m2 -> m1, m1 -> m}, {x, 0, 3}]]
```

```
- (-1 + 2 m) (1 + s) (2 + α)2 (-1 + (-1 + p22) α)2 -
  2 ((-1 + m) (2 + 2 s + s2) (-1 + (-1 + p22) α) (2 + 3 α + α2)) x + 4 (1 + s) (1 + α)2 x2 + O[x]4
```

```
cpolgenT21noRsym[p22_, x_, s_, α_, m_] := - (-1 + 2 m) (1 + s) (2 + α)2 (-1 + (-1 + p22) α)2 -
  2 ((-1 + m) (2 + 2 s + s2) (-1 + (-1 + p22) α) (2 + 3 α + α2)) x + 4 (1 + s) (1 + α)2 x2
```

An analogous analysis yields the conditions of stability at the edge  $t12 = t22 = 1$ . In particular, we obtain:

Therefore, if  $\{s \rightarrow 0.2, \alpha \rightarrow 10, m \rightarrow 0.01, r > 0\}$ , then the equilibria with  $p22 > 0.945715$  are

stable.

If  $\{s \rightarrow 0.2, \alpha \rightarrow 1, m \rightarrow 0.01, r > 0\}$ , then the equilibria with  $p_{22} > 0.877926$  are stable.

## 2.2 Equilibria under random mating ( $\alpha_1 = \alpha_2 = 0$ )

$$\begin{aligned} \text{condeq} = & \text{FullSimplify}[\text{itgen}[s_1, s_2, 0, 0, m_1, m_2, r][\{p_{12}, t_{12}, d_1, p_{22}, t_{22}, d_2\}] - \\ & \{p_{12}, t_{12}, d_1, p_{22}, t_{22}, d_2\}] \\ & \left\{ \left( -d_1 s_1 + m_1 (p_{22} + d_1 s_1 - d_2 s_1 + p_{22} s_1 + p_{12} (-1 + s_1 (-1 + t_{22})) - p_{22} s_1 t_{22}) \right) / \right. \\ & \left. (1 + s_1 (1 + (-1 + m_1) t_{12} - m_1 t_{22})), \frac{s_1 (-1 + t_{12}) t_{12} - m_1 (1 + s_1 t_{12}) (t_{12} - t_{22})}{1 + s_1 (1 + (-1 + m_1) t_{12} - m_1 t_{22})}, \right. \\ & - \frac{1}{(1 + s_1 (1 + (-1 + m_1) t_{12} - m_1 t_{22}))^2} (m_1 (-1 + r) (1 + s_1) \\ & (d_2 - (-1 + m_1) (p_{12} - p_{22}) (t_{12} - t_{22})) + d_1 (r + s_1 + s_1 (r + s_1 (-1 + t_{12})^2 - 2 t_{12}) + \\ & m_1 (1 + s_1 - r (1 + s_1) - 2 s_1 (-1 + s_1 (-1 + t_{12})) (t_{12} - t_{22})) + m_1^2 s_1^2 (t_{12} - t_{22})^2) \Big), \\ & \left. \frac{(d_2 s_2 + m_2 (p_{12} + (d_1 - d_2) s_2 + p_{12} s_2 t_{12} - p_{22} (1 + s_2 t_{12})))}{(1 + m_2 s_2 (t_{12} - t_{22}) + s_2 t_{22})}, \right. \\ & 1 + \frac{1}{s_2} - t_{22} - \frac{1 + s_2}{s_2 (1 + m_2 s_2 (t_{12} - t_{22}) + s_2 t_{22})}, \\ & \left. \frac{1}{(1 + m_2 s_2 (t_{12} - t_{22}) + s_2 t_{22})^2} \left( -d_1 m_2 (-1 + r) (1 + s_2) + \right. \right. \\ & \left. \left. (-1 + m_2) m_2 (p_{12} - p_{22}) (-1 + r) (1 + s_2) (t_{12} - t_{22}) - d_2 (r - s_2 + m_2^2 s_2^2 (t_{12} - t_{22})^2 + \right. \right. \\ & \left. \left. m_2 (1 + s_2 - r (1 + s_2) + 2 s_2 (t_{12} - t_{22}) (1 + s_2 t_{22})) + s_2 (r + t_{22} (2 + s_2 t_{22})) \right) \right) \Big\} \end{aligned}$$

$$\begin{aligned}
& \text{Simplify}\left[\text{Solve}\left[\left\{s_1(-1+t_{12})t_{12}-m_1(1+s_1t_{12})(t_{12}-t_{22}),\right.\right.\right. \\
& \quad \left.\left.\left.1+\frac{1}{s_2}-t_{22}-\frac{1+s_2}{s_2(1+m_2s_2(t_{12}-t_{22})+s_2t_{22})}\right\}==0,\right.\right. \\
& \quad \left.\left.\{t_{12}, t_{22}\}\right], \text{Assumptions} \rightarrow \{s_1>0, s_2>0, m_1>0, m_2>0\}\right] \\
& \left\{\{t_{12} \rightarrow 0, t_{22} \rightarrow 0\}, \{t_{12} \rightarrow 1, t_{22} \rightarrow 1\}, \left\{t_{12} \rightarrow \right.\right. \\
& \quad \left.\left.-\frac{1}{2(-1+m_1)(-1+m_1+m_2)s_1s_2}\left(-m_1m_2s_1-2m_1s_2+2m_1^2s_2+m_1m_2s_2-s_1s_2+m_1s_1s_2+m_2\right.\right.\right. \\
& \quad \left.\left.\left.s_1s_2-m_1m_2s_1s_2+\sqrt{\left(-4(-1+m_1)m_1(-1+m_1+m_2)s_2\left((m_1+s_1)s_2-m_2s_1(1+s_2)\right)+\right.\right.\right.\right. \\
& \quad \left.\left.\left.\left(2m_1^2s_2+(-1+m_2)s_1s_2+m_1((-2+s_1)s_2-m_2(s_1-s_2+s_1s_2))\right)^2\right)\right)\right),\right. \\
& \quad \left.t_{22} \rightarrow \left(1/\left(4(-1+m_1)m_1(-1+m_2)(-1+m_1+m_2)s_1s_2^2\right)\right)\right. \\
& \quad \left.\left(-m_1m_2s_1-2m_1s_2+2m_1^2s_2+m_1m_2s_2-s_1s_2+m_1s_1s_2+m_2s_1s_2-m_1m_2s_1s_2+\right.\right. \\
& \quad \left.\left.\sqrt{\left(-4(-1+m_1)m_1(-1+m_1+m_2)s_2\left((m_1+s_1)s_2-m_2s_1(1+s_2)\right)+\right.\right.\right.\right. \\
& \quad \left.\left.\left.\left(2m_1^2s_2+(-1+m_2)s_1s_2+m_1((-2+s_1)s_2-m_2(s_1-s_2+s_1s_2))\right)^2\right)\right)\right)\right) \\
& \quad \left.\left(m_1m_2s_1-m_1m_2s_2+s_1s_2-m_1s_1s_2-m_2s_1s_2+m_1m_2s_1s_2+\right.\right. \\
& \quad \left.\left.\sqrt{\left(-4(-1+m_1)m_1(-1+m_1+m_2)s_2\left((m_1+s_1)s_2-m_2s_1(1+s_2)\right)+\right.\right.\right.\right. \\
& \quad \left.\left.\left.\left(2m_1^2s_2+(-1+m_2)s_1s_2+m_1((-2+s_1)s_2-m_2(s_1-s_2+s_1s_2))\right)^2\right)\right)\right)\right)\right\}, \\
& \left\{t_{12} \rightarrow \frac{1}{2(-1+m_1)(-1+m_1+m_2)s_1s_2}\left(m_1m_2s_1+2m_1s_2-2m_1^2s_2-m_1m_2s_2+s_1s_2-m_1s_1s_2-\right.\right. \\
& \quad \left.\left.m_2s_1s_2+m_1m_2s_1s_2+\sqrt{\left(-4(-1+m_1)m_1(-1+m_1+m_2)s_2\left((m_1+s_1)s_2-m_2s_1(1+s_2)\right)+\right.\right.\right.\right. \\
& \quad \left.\left.\left.\left(2m_1^2s_2+(-1+m_2)s_1s_2+m_1((-2+s_1)s_2-m_2(s_1-s_2+s_1s_2))\right)^2\right)\right)\right),\right. \\
& \quad \left.t_{22} \rightarrow \left(1/\left(4(-1+m_1)m_1(-1+m_2)(-1+m_1+m_2)s_1s_2^2\right)\right)\right. \\
& \quad \left.\left(-m_1m_2s_1+m_1m_2s_2-s_1s_2+m_1s_1s_2+m_2s_1s_2-m_1m_2s_1s_2+\right.\right. \\
& \quad \left.\left.\sqrt{\left(-4(-1+m_1)m_1(-1+m_1+m_2)s_2\left((m_1+s_1)s_2-m_2s_1(1+s_2)\right)+\right.\right.\right.\right. \\
& \quad \left.\left.\left.\left(2m_1^2s_2+(-1+m_2)s_1s_2+m_1((-2+s_1)s_2-m_2(s_1-s_2+s_1s_2))\right)^2\right)\right)\right)\right) \\
& \quad \left.\left(m_1m_2s_1+2m_1s_2-2m_1^2s_2-m_1m_2s_2+s_1s_2-m_1s_1s_2-m_2s_1s_2+m_1m_2s_1s_2+\right.\right. \\
& \quad \left.\left.\sqrt{\left(-4(-1+m_1)m_1(-1+m_1+m_2)s_2\left((m_1+s_1)s_2-m_2s_1(1+s_2)\right)+\right.\right.\right.\right. \\
& \quad \left.\left.\left.\left(2m_1^2s_2+(-1+m_2)s_1s_2+m_1((-2+s_1)s_2-m_2(s_1-s_2+s_1s_2))\right)^2\right)\right)\right)\right)\right\}
\end{aligned}$$

Comparison with the polymorphism from 1-locus model shows that the migration-selection equilibrium is

$$\text{migselsol} = \left\{ t_{12} \rightarrow -\frac{1}{2(-1+m_1)(-1+m_1+m_2)s_1s_2} \right. \\ \left. \left( -m_1m_2s_1 - 2m_1s_2 + 2m_1^2s_2 + m_1m_2s_2 - s_1s_2 + m_1s_1s_2 + m_2s_1s_2 - m_1m_2s_1s_2 + \right. \right. \\ \left. \sqrt{\left( -4(-1+m_1)m_1(-1+m_1+m_2)s_2\left((m_1+s_1)s_2 - m_2s_1(1+s_2)\right) + \right. \right.} \\ \left. \left. \left( 2m_1^2s_2 + (-1+m_2)s_1s_2 + m_1((-2+s_1)s_2 - m_2(s_1-s_2+s_1s_2))\right)^2 \right) \right), \right. \\ \left. t_{22} \rightarrow \left( \frac{1}{4(-1+m_1)m_1(-1+m_2)(-1+m_1+m_2)s_1s_2^2} \right) \right. \\ \left( -m_1m_2s_1 - 2m_1s_2 + 2m_1^2s_2 + m_1m_2s_2 - s_1s_2 + m_1s_1s_2 + m_2s_1s_2 - m_1m_2s_1s_2 + \right. \\ \left. \sqrt{\left( -4(-1+m_1)m_1(-1+m_1+m_2)s_2\left((m_1+s_1)s_2 - m_2s_1(1+s_2)\right) + \right. \right.} \\ \left. \left. \left( 2m_1^2s_2 + (-1+m_2)s_1s_2 + m_1((-2+s_1)s_2 - m_2(s_1-s_2+s_1s_2))\right)^2 \right) \right) \right. \\ \left. \left( m_1m_2s_1 - m_1m_2s_2 + s_1s_2 - m_1s_1s_2 - m_2s_1s_2 + m_1m_2s_1s_2 + \right. \right. \\ \left. \sqrt{\left( -4(-1+m_1)m_1(-1+m_1+m_2)s_2\left((m_1+s_1)s_2 - m_2s_1(1+s_2)\right) + \right. \right.} \\ \left. \left. \left( 2m_1^2s_2 + (-1+m_2)s_1s_2 + m_1((-2+s_1)s_2 - m_2(s_1-s_2+s_1s_2))\right)^2 \right) \right) \right\};$$

```
Simplify[{condeg[[2]], condeg[[5]]} /. migselsol,
Assumptions -> {s1 > 0, s2 > 0, m1 > 0, m2 > 0}]
{0, 0}
```

Determine other coordinates:

```
Simplify[Numerator[Factor[{condeg[[1]], condeg[[4]]} /. migselsol]],
Assumptions -> {s1 > 0, s2 > 0, m1 > 0, m2 > 0}]
{ 2 d1 (-1+m2)^2 s1 s2 + m1^2 ((2 (d1-d2) s1 - p12 (2+s1) + p22 (2+s1)) s2 +
m2 (2 (-d1+d2) s1 s2 + p12 (s1 (-1+s2) + 3 s2) + p22 (s1-3 s2 - s1 s2))) +
m1 (2 m2 p12 s1 - 2 m2^2 p12 s1 - 2 m2 p22 s1 + 2 m2^2 p22 s1 + 2 p12 s2 - 4 m2 p12 s2 + 2 m2^2 p12 s2 -
2 p22 s2 + 4 m2 p22 s2 - 2 m2^2 p22 s2 - 4 d1 s1 s2 + 2 d2 s1 s2 + 6 d1 m2 s1 s2 - 4 d2 m2 s1 s2 -
2 d1 m2^2 s1 s2 + 2 d2 m2^2 s1 s2 + p12 s1 s2 - m2 p12 s1 s2 - p22 s1 s2 + m2 p22 s1 s2 -
p12 sqrt((-1+m2)^2 s1^2 s2^2 - 2 m1 (-1+m2) s1 s2 (-s1 s2 + m2 (2+s1+s2+s1 s2)) +
m1^2 (s1^2 s2^2 + m2^2 (s1+s2+s1 s2)^2 - 2 m2 s1 s2 (2+s1+s2+s1 s2))) +
p22 sqrt((-1+m2)^2 s1^2 s2^2 - 2 m1 (-1+m2) s1 s2 (-s1 s2 + m2 (2+s1+s2+s1 s2)) +
m1^2 (s1^2 s2^2 + m2^2 (s1+s2+s1 s2)^2 - 2 m2 s1 s2 (2+s1+s2+s1 s2))) ),
-2 d2 (-1+m1)^2 s1 s2 + m2^2 (-2 (d1-d2) (-1+m1) s1 s2 +
p12 (m1 s2 + s1 (2+s2-m1 (3+s2))) + p22 (-m1 s2 + s1 (-2-s2+m1 (3+s2)))) +
m2 (-2 p12 s1 + 4 m1 p12 s1 - 2 m1^2 p12 s1 + 2 p22 s1 - 4 m1 p22 s1 + 2 m1^2 p22 s1 - 2 m1 p12 s2 +
2 m1^2 p12 s2 + 2 m1 p22 s2 - 2 m1^2 p22 s2 - 2 d1 s1 s2 + 4 d2 s1 s2 + 4 d1 m1 s1 s2 - 6 d2 m1 s1 s2 -
2 d1 m1^2 s1 s2 + 2 d2 m1^2 s1 s2 - p12 s1 s2 + m1 p12 s1 s2 + p22 s1 s2 - m1 p22 s1 s2 +
p12 sqrt((-1+m2)^2 s1^2 s2^2 - 2 m1 (-1+m2) s1 s2 (-s1 s2 + m2 (2+s1+s2+s1 s2)) +
m1^2 (s1^2 s2^2 + m2^2 (s1+s2+s1 s2)^2 - 2 m2 s1 s2 (2+s1+s2+s1 s2))) -
p22 sqrt((-1+m2)^2 s1^2 s2^2 - 2 m1 (-1+m2) s1 s2 (-s1 s2 + m2 (2+s1+s2+s1 s2)) +
m1^2 (s1^2 s2^2 + m2^2 (s1+s2+s1 s2)^2 - 2 m2 s1 s2 (2+s1+s2+s1 s2))) ) }
```

**Simplify[Solve[% == 0, {d1, d2}]]**

$$\left\{ \left\{ d1 \rightarrow \frac{1}{2(-1+m1)(-1+m1+m2)s1s2} m1(p12-p22) \right. \right. \\ \left. \left( -m1m2s1-2s2+2m1s2+2m2s2-m1m2s2-s1s2+m1s1s2+m2s1s2-m1m2s1s2+ \right. \right. \\ \left. \sqrt{\left( (-1+m2)^2 s1^2 s2^2 - 2m1(-1+m2)s1s2(-s1s2+m2(2+s1+s2+s1s2)) \right)} + \right. \\ \left. \left. m1^2(s1^2 s2^2 + m2^2(s1+s2+s1s2)^2 - 2m2s1s2(2+s1+s2+s1s2)) \right) \right\}, \\ d2 \rightarrow \frac{1}{2(-1+m2)(-1+m1+m2)s1s2} m2(p12-p22) \left( -2s1+2m1s1+2m2s1- \right. \\ \left. m1m2s1-m1m2s2-s1s2+m1s1s2+m2s1s2-m1m2s1s2+ \right. \\ \left. \sqrt{\left( (-1+m2)^2 s1^2 s2^2 - 2m1(-1+m2)s1s2(-s1s2+m2(2+s1+s2+s1s2)) \right)} + \right. \\ \left. \left. m1^2(s1^2 s2^2 + m2^2(s1+s2+s1s2)^2 - 2m2s1s2(2+s1+s2+s1s2)) \right) \right\} \right\}$$

$$d1d2\alpha0 = \left\{ d1 \rightarrow \frac{1}{2(-1+m1)(-1+m1+m2)s1s2} m1(p12-p22) \right. \\ \left( -m1m2s1-2s2+2m1s2+2m2s2-m1m2s2-s1s2+m1s1s2+m2s1s2-m1m2s1s2+ \right. \\ \left. \sqrt{\left( (-1+m2)^2 s1^2 s2^2 - 2m1(-1+m2)s1s2(-s1s2+m2(2+s1+s2+s1s2)) \right)} + \right. \\ \left. \left. m1^2(s1^2 s2^2 + m2^2(s1+s2+s1s2)^2 - 2m2s1s2(2+s1+s2+s1s2)) \right) \right\}, \\ d2 \rightarrow \frac{1}{2(-1+m2)(-1+m1+m2)s1s2} m2(p12-p22) \left( -2s1+2m1s1+2m2s1- \right. \\ \left. m1m2s1-m1m2s2-s1s2+m1s1s2+m2s1s2-m1m2s1s2+ \right. \\ \left. \sqrt{\left( (-1+m2)^2 s1^2 s2^2 - 2m1(-1+m2)s1s2(-s1s2+m2(2+s1+s2+s1s2)) \right)} + \right. \\ \left. \left. m1^2(s1^2 s2^2 + m2^2(s1+s2+s1s2)^2 - 2m2s1s2(2+s1+s2+s1s2)) \right) \right\};$$

We have  $p12 = p22$  if and only if  $d1 = d2 = 0!!!$

**Simplify[condeq /. migselso1 /. d1d2alpha0]**

$$\left\{ 0, 0, - \left( 2m1(-1+m2)(p12-p22)r(1+s1)s2 \right) / \right. \\ \left( s1 \left( m1m2s1+2s2-2m1s2-2m2s2+m1m2s2+s1s2-m1s1s2-m2s1s2+ \right. \right. \\ \left. m1m2s1s2 + \sqrt{\left( -4(-1+m1)m1(-1+m1+m2)s2((m1+s1)s2-m2s1(1+s2)) \right)} + \right. \\ \left. \left. \left( 2m1^2s2 + (-1+m2)s1s2+m1((-2+s1)s2-m2(s1-s2+s1s2))^2 \right) \right) \right) \right\}, \\ 0, 0, - \left( 2(-1+m1)m2(p12-p22)r s1(1+s2) \right) / \right. \\ \left( s2 \left( 2s1-2m1s1-2m2s1+m1m2s1+m1m2s2+s1s2-m1s1s2-m2s1s2+ \right. \right. \\ \left. m1m2s1s2 + \sqrt{\left( -4(-1+m1)m1(-1+m1+m2)s2((m1+s1)s2-m2s1(1+s2)) \right)} + \right. \\ \left. \left. \left( 2m1^2s2 + (-1+m2)s1s2+m1((-2+s1)s2-m2(s1-s2+s1s2))^2 \right) \right) \right) \right\}$$

**Simplify[Solve[% == 0, {p12, p22}]]**

 **Solve:** Equations may not give solutions for all "solve" variables.

$\{ \{ p22 \rightarrow p12 \} \}$

Therefore: If  $\alpha1 = \alpha2 = 0$ , the equilibria are given by  $p12 = p22$ ,  $d1 = d2 = 0$ , and  $\{t12, t22\}$  are the allele frequencies at migration-selection balance (migselso1).

Therefore, as expected, there is a line of equilibria.

The condition for existence of the polymorphic migration –  
selection equilibrium is  $-(1 - m_2) < \frac{m_1}{s_1} - \frac{m_2}{s_2} < 1 - m_1$

## 2.3 Derivation of manifold/curve of equilibria for $r=0/r>0$ (assuming symmetric parameters)

### 2.3.1 Equilibrium conditions and their structure

Solving  $\text{deltagensym} = 0$  yields the potential equilibria (conditional on admissibility)

$\text{deltagensym} = \text{Simplify}[\text{itgen}[s, s, \alpha, \alpha, m, m, r][\{p12, t12, dd1, p22, t22, dd2\}] - \{p12, t12, dd1, p22, t22, dd2\}]$

```
deltagensym =
{ -p12 + (-(-1+m)^2 m p12^2 (1+s) (-1+s (-1+t12)) (t12-t22) α (2+α) - dd1 (α+t12 α^2 +
2 s^3 (-1+t12)^2 (1+α) + s (2+(4+2 dd1-t12) α + (dd1+(3-2 t12) t12) α^2) +
s^2 (4+(5+2 dd1) α + dd1 α^2 - 2 t12^2 α^2 + t12 (-4-5 α+2 α^2))) -
m^3 (t12-t22) (p22^2 (1+s) (-1+s (-1+t22)) α (2+α) - 2 (dd1-dd2) s (t12-t22)
(s-α) (s+α+s α) + p22 ((t12-t22) α^2 + 2 s^3 (t12-t22) (-1+t22) (1+α) -
s α (dd1 (2+α) - dd2 (2+α) + (t12-t22) (-1-3 α+2 t22 α)) + s^2 (2 t22^2 α^2 -
(dd1-dd2) α (2+α) + t22 (2+α-2 α^2) - t12 (2+α+2 (-1+t22) α^2))) +
m^2 (-dd1^2 s (1+s) α (2+α) + p22^2 (1+s) (-1+s (-1+t22)) (t12-t22)
α (2+α) - dd2 ((-t12+t22) α^2 - 4 s^3 (-1+t12) (t12-t22) (1+α) +
s (dd2 α (2+α) + (t12-t22) α (1+(-3+4 t12) α)) + s^2 (4 t12^2 α^2 +
dd2 α (2+α) + t22 (-4-5 α+2 α^2) + t12 (4+5 α-2 (1+2 t22) α^2))) +
dd1 ((-t12+t22) α^2 - 2 s^3 (3 t12^2 + t22 (2+t22) - 2 t12 (1+2 t22)) (1+α) +
s (2 dd2 α (2+α) + (t12-t22) α (1+(-3+6 t12-2 t22) α)) +
s^2 (6 t12^2 α^2 + 2 t22^2 α^2 + 2 dd2 α (2+α) +
t22 (-4-5 α+2 α^2) + t12 (4+5 α-2 (1+4 t22) α^2))) +
p22 (-2 dd1 α + 2 dd2 α - t12 α + t22 α - dd1 α^2 + dd2 α^2 - 2 t12 α^2 + 2 t12^2 α^2 +
2 t22 α^2 - t12 t22 α^2 - t22^2 α^2 + 4 s^3 (-1+t12) (t12-t22) (-1+t22) (1+α) +
s (-2 (dd1-dd2) α (2+α) + 2 t12^2 α (1+(3-2 t22) α) + t22^2 (α-3 α^2) +
t22 (-4+(-2+6 dd1-4 dd2) α + (4+3 dd1-2 dd2) α^2) + t12
(4+(2-4 dd1+2 dd2-3 t22) α + (-4-2 dd1+dd2-3 t22+4 t22^2) α^2)) +
s^2 (- (dd1-dd2) α (2+α) + t22^2 (4+5 α-2 α^2) + t22 (-8+(-7+6 dd1-4 dd2)
α + (2+3 dd1-2 dd2) α^2) - 2 t12^2 (2+α+2 (-1+t22) α^2) + t12 (8+
(7-4 dd1+2 dd2-3 t22) α + (-2-2 dd1+dd2-2 t22+4 t22^2) α^2))) +
m (2 dd1^2 s (1+s) α (2+α) - dd2 (-1+s (-1+t12) - t12 α)
(-α+2 s^2 (-1+t12) (1+α) + s (-2+(-3+2 t12) α)) +
dd1 (2 s^3 (-1+t12) (-1+3 t12-2 t22) (1+α) + α (1+2 t12 α - t22 α) +
s (2+(4-4 dd2-2 t12+t22) α + (-2 dd2+6 t12-6 t12^2-3 t22+4 t12 t22)
α^2) + s^2 (4+5 α-4 dd2 α - 2 dd2 α^2 - 6 t12^2 α^2 +
t22 (4+5 α-2 α^2) + 2 t12 (-4-5 α+2 (1+t22) α^2))) +
p22 (2+dd1 α + 2 t12 α - 2 s^3 (-1+t12)^2 (-1+t22) (1+α) +
α (dd1 (1+α) - (-2+t12+t22) (1+t12 α)) + s^2 (6+6 α+2 dd1 α + dd1 α^2 -
t22 (4+(5+4 dd1) α + 2 dd1 α^2) + t12^2 (2+α+2 (-1+t22) α^2) + t12
```



$$\begin{aligned}
& \left( -8 + (-7 + 2 \text{dd1}) \alpha + (2 + \text{dd1}) \alpha^2 + \text{t22} (4 + 5 \alpha - 2 \alpha^2) \right) + s \left( \text{t12}^2 \alpha (-1 + \right. \\
& \quad \left. (-3 + 2 \text{t22}) \alpha) + \text{t12} (-4 + (-2 + 2 \text{dd1} + \text{t22}) \alpha + (4 + \text{dd1} - 3 \text{t22}) \alpha^2) - \right. \\
& \quad \left. 2 (-3 - \text{dd1} \alpha - \alpha (3 + \text{dd1} + \text{dd1} \alpha) + \text{t22} (1 + 2 (1 + \text{dd1}) \alpha + \text{dd1} \alpha^2)) \right) + \\
& (-1 + m) \text{p12} \left( -2 - 2 \alpha - 2 \text{dd1} \alpha + 2 \text{dd1} m \alpha - 2 \text{dd2} m \alpha + m \text{t12} \alpha + 2 m \text{p22} \text{t12} \alpha - \right. \\
& \quad 4 m^2 \text{p22} \text{t12} \alpha - m \text{t22} \alpha - 2 m \text{p22} \text{t22} \alpha + 4 m^2 \text{p22} \text{t22} \alpha - \text{dd1} \alpha^2 + \\
& \quad \text{dd1} m \alpha^2 - \text{dd2} m \alpha^2 - 2 \text{t12} \alpha^2 + 2 m \text{t12} \alpha^2 + m \text{p22} \text{t12} \alpha^2 - \\
& \quad 2 m^2 \text{p22} \text{t12} \alpha^2 + 2 \text{t12}^2 \alpha^2 - 3 m \text{t12}^2 \alpha^2 + m^2 \text{t12}^2 \alpha^2 - 2 m \text{t22} \alpha^2 - \\
& \quad m \text{p22} \text{t22} \alpha^2 + 2 m^2 \text{p22} \text{t22} \alpha^2 + 3 m \text{t12} \text{t22} \alpha^2 - 2 m^2 \text{t12} \text{t22} \alpha^2 + \\
& \quad m^2 \text{t22}^2 \alpha^2 + 2 s^3 (-1 + \text{t12}) (-1 + \text{t12} - m \text{t12} + m \text{t22})^2 (1 + \alpha) - \\
& \quad s^2 \left( 6 + 6 \alpha + 2 \text{dd1} \alpha + \text{dd1} \alpha^2 + 2 (-1 + m)^2 \text{t12}^3 \alpha^2 + m^2 \text{t22} ((-\text{dd1} + \text{dd2} - 2 \text{p22}) \alpha \right. \\
& \quad \left. (2 + \alpha) + \text{t22} (2 + \alpha + 2 \text{p22} \alpha + (-2 + \text{p22}) \alpha^2)) + m ((-\text{dd1} + \text{dd2}) \alpha (2 + \alpha) + \right. \\
& \quad \left. \text{t22} (-8 + (-7 + 2 \text{dd1} + 2 \text{p22}) \alpha + (2 + \text{dd1} + \text{p22}) \alpha^2)) - \right. \\
& \quad \left. (-1 + m) \text{t12}^2 (6 + 6 \alpha - 4 \alpha^2 + m (-2 + (-1 + 2 \text{p22}) \alpha + (2 + \text{p22} + 4 \text{t22}) \alpha^2)) + \right. \\
& \quad \left. \text{t12} (-12 - 12 \alpha - 2 \text{dd1} \alpha + 2 \alpha^2 - \text{dd1} \alpha^2 + m^2 (2 \text{t22}^2 \alpha^2 + (\text{dd1} - \text{dd2} + 2 \text{p22}) \right. \\
& \quad \left. \alpha (2 + \alpha) + \text{t22} (-4 - 2 \alpha + 4 \alpha^2)) - m (-8 + (-7 + 2 \text{dd2} + 2 \text{p22}) \alpha + \right. \\
& \quad \left. (2 + \text{dd2} + \text{p22}) \alpha^2 + \text{t22} (-8 + (-7 + 2 \text{p22}) \alpha + (6 + \text{p22}) \alpha^2)) \right) + \\
& s \left( -2 (-1 + m)^2 \text{t12}^3 \alpha^2 + m^2 \text{t22} \alpha (8 \text{p22} + \text{t22} - 2 \text{p22} \text{t22} + 4 \text{p22} \alpha + \right. \\
& \quad 3 \text{t22} \alpha - \text{p22} \text{t22} \alpha + \text{dd1} (2 + \alpha) - \text{dd2} (2 + \alpha)) - \\
& \quad 2 (3 + \text{dd1} \alpha + \alpha (3 + \text{dd1} + \text{dd1} \alpha)) - m (-2 (\text{dd1} - \text{dd2}) \alpha (2 + \alpha) + \\
& \quad \text{t22} (-4 + 2 (-1 + \text{dd1} + 2 \text{p22}) \alpha + (4 + \text{dd1} + 2 \text{p22}) \alpha^2)) + \\
& \quad (-1 + m) \text{t12}^2 \alpha (-6 \alpha + m (1 + 3 \alpha + 4 \text{t22} \alpha + \text{p22} (2 + \alpha))) + \\
& \quad \left. \text{t12} (6 + 6 \alpha + 2 \text{dd1} \alpha - 4 \alpha^2 + \text{dd1} \alpha^2 + m (-4 + (-2 + 2 \text{dd2} + \text{t22} + 2 \text{p22} (2 + \text{t22})) \right. \\
& \quad \left. \alpha + (4 + \text{dd2} + 9 \text{t22} + \text{p22} (2 + \text{t22})) \alpha^2) - m^2 \alpha (\text{dd1} (2 + \alpha) - \right. \\
& \quad \left. \text{dd2} (2 + \alpha) + 2 (2 \text{p22} (2 + \alpha) + \text{t22} (1 + (3 + \text{t22}) \alpha))) \right) \Big/ \\
& (2 (1 + s (1 + (-1 + m) \text{t12} - m \text{t22})) (1 + (1 + (-1 + m) \text{t12} - m \text{t22}) \alpha + \\
& \quad s (1 + (-1 + m) \text{t12} - m \text{t22}) (1 + \alpha)) \\
& \quad (1 + s (1 + (-1 + m) \text{t12} - m \text{t22}) + m \text{t22} \alpha + \text{t12} (\alpha - m \alpha))) , \\
& -\text{t12} - (((-1 + m) \text{t12} - m \text{t22}) (2 + \text{p12} \alpha - m \text{p12} \alpha + m \text{p22} \alpha + 2 \text{t12} \alpha - \\
& \quad 2 m \text{t12} \alpha - \text{p12} \text{t12} \alpha + 2 m \text{p12} \text{t12} \alpha - m^2 \text{p12} \text{t12} \alpha - \\
& \quad m \text{p22} \text{t12} \alpha + m^2 \text{p22} \text{t12} \alpha + 2 m \text{t22} \alpha - m \text{p12} \text{t22} \alpha + \\
& \quad m^2 \text{p12} \text{t22} \alpha - m^2 \text{p22} \text{t22} \alpha + s (1 + (-1 + m) \text{t12} - m \text{t22}) \\
& \quad (4 + (2 + 2 \text{dd1} (-1 + m) - 2 \text{dd2} m + 4 \text{p12} - 4 m \text{p12} + 4 m \text{p22} + \text{t12} - m \\
& \quad \text{t12} - 2 \text{p12} \text{t12} + 2 m \text{p12} \text{t12} + m \text{t22} - 2 m \text{p22} \text{t22}) \alpha + \\
& \quad (\text{dd1} (-1 + m) - \text{dd2} m + 2 \text{p12} - 2 m \text{p12} + 2 m \text{p22} + \text{t12} - m \text{t12} - \text{p12} \\
& \quad \text{t12} + m \text{p12} \text{t12} + m \text{t22} - m \text{p22} \text{t22}) \alpha^2) - (1 + (-1 + m) \text{t12} - m \text{t22}) \\
& \quad \alpha (-1 - \text{t12} \alpha + (-1 + m) \text{p12} (1 + \alpha) - m (\text{p22} + \text{p22} \alpha - \text{t12} \alpha + \text{t22} \alpha)) + \\
& \quad s^2 (1 + (-1 + m) \text{t12} - m \text{t22}) (2 + \alpha) (1 - \text{dd1} \alpha + \text{p12} \alpha + (-1 + m) \text{t12} (1 + \text{p12} \alpha) - \\
& \quad m (\text{t22} + (-\text{dd1} + \text{dd2} + \text{p12} - \text{p22}) \alpha + \text{p22} \text{t22} \alpha))) \Big/ \\
& (2 (1 + s (1 + (-1 + m) \text{t12} - m \text{t22})) (1 + (1 + (-1 + m) \text{t12} - m \text{t22}) \alpha + \\
& \quad s (1 + (-1 + m) \text{t12} - m \text{t22}) (1 + \alpha)) \\
& \quad (1 + s (1 + (-1 + m) \text{t12} - m \text{t22}) + m \text{t22} \alpha + \text{t12} (\alpha - m \alpha))) , \\
& \frac{1}{4} \left( -4 \text{dd1} - \frac{1}{(1 + s (1 + (-1 + m) \text{t12} - m \text{t22}))^4} (1 + s) \right. \\
& \quad \left. (-1 + s (-1 + \text{t12} - m \text{t12} + m \text{t22}))^2 \right. \\
& \quad \left. - (((\text{dd1} (-1 + m) - \text{dd2} m - \text{p12} \text{t12} + m \text{p12} \text{t12} - m \text{p22} \text{t22}) (\text{dd1} (-1 + m) - \right. \\
& \quad \left. \text{dd2} m + \text{p12} - m \text{p12} + m \text{p22} - \text{p12} \text{t12} + m \text{p12} \text{t12} - m \text{p22} \text{t22}) (1 + \alpha)) \Big/ \right. \\
& \quad \left. (-1 + s (-1 + \text{t12} - m \text{t12} + m \text{t22}) + (-1 + m) \text{t12} \alpha - m \text{t22} \alpha)) - \right. \\
& \quad \left. ((-1 + r) (\text{dd1} (-1 + m) - \text{dd2} m + \text{p12} - m \text{p12} + m \text{p22} - \text{p12} \text{t12} + m \text{p12} \text{t12} - m \text{p22} \text{t22}) \right.
\end{aligned}$$

$$\begin{aligned}
& \left( \frac{(dd1(-1+m) - dd2m + t12 - m t12 - p12 t12 + m p12 t12 + m t22 - m p22 t22)}{(1+\alpha)} \right) / \left( (-1+s(-1+t12 - m t12 + m t22) + (-1+m) t12 \alpha - m t22 \alpha) - \right. \\
& \left. (r(dd1(-1+m) - dd2m - p12 t12 + m p12 t12 - m p22 t22) (-1+dd1(-1+m) - dd2m + \right. \\
& \left. p12 - m p12 + m p22 + t12 - m t12 - p12 t12 + m p12 t12 + m t22 - m p22 t22)) \right) / \\
& \left( 1 + (1 + (-1+m) t12 - m t22) \alpha + s(1 + (-1+m) t12 - m t22) (1+\alpha) \right) + \\
& \left( (-1+r)(dd1(-1+m) - dd2m + p12 - m p12 + m p22 - p12 t12 + m p12 t12 - m p22 t22) \right. \\
& \left. (dd1(-1+m) - dd2m + t12 - m t12 - p12 t12 + m p12 t12 + m t22 - m p22 t22) (1+\alpha) \right) / \\
& \left( 1 + (1 + (-1+m) t12 - m t22) \alpha + s(1 + (-1+m) t12 - m t22) (1+\alpha) \right) + \\
& \left( (1+s)(dd1(-1+m) - dd2m + p12 - m p12 + m p22 - p12 t12 + m p12 t12 - m p22 t22) \right. \\
& \left. (-1+dd1(-1+m) - dd2m + p12 - m p12 + m p22 + t12 - m t12 - p12 t12 + m p12 t12 + m t22 - m p22 t22) (1+\alpha) \right) / \\
& \left( 1 + (1 + (-1+m) t12 - m t22) \alpha + s(1 + (-1+m) t12 - m t22) (1+\alpha) \right) + \\
& \left( (dd1(-1+m) - dd2m - p12 t12 + m p12 t12 - m p22 t22) \right. \\
& \left. (dd1(-1+m) - dd2m + p12 - m p12 + m p22 - p12 t12 + m p12 t12 - m p22 t22) \right) / \\
& \left( 1 + s(1 + (-1+m) t12 - m t22) + m t22 \alpha + t12 (\alpha - m \alpha) \right) - \\
& \left( r(dd1(-1+m) - dd2m - p12 t12 + m p12 t12 - m p22 t22) (-1+dd1(-1+m) - dd2m + \right. \\
& \left. p12 - m p12 + m p22 + t12 - m t12 - p12 t12 + m p12 t12 + m t22 - m p22 t22)) \right) / \\
& \left( 1 + s(1 + (-1+m) t12 - m t22) + m t22 \alpha + t12 (\alpha - m \alpha) \right) + \\
& \left( (1+s)(dd1(-1+m) - dd2m + p12 - m p12 + m p22 - p12 t12 + m p12 t12 - m p22 t22) \right. \\
& \left. (-1+dd1(-1+m) - dd2m + p12 - m p12 + m p22 + t12 - m t12 - p12 t12 + m p12 t12 + m t22 - m p22 t22) \right) / \\
& \left( 1 + s(1 + (-1+m) t12 - m t22) + m t22 \alpha + t12 (\alpha - m \alpha) \right) - \left( 2(1+s) \right. \\
& \left. (dd1 - dd1m + dd2m - p12 + m p12 - m p22 + p12 t12 - m p12 t12 + m p22 t22)^2 \right) / \\
& \left( 1 + s(1 + (-1+m) t12 - m t22) + m t22 \alpha + t12 (\alpha - m \alpha) \right) \\
& \left( - \left( (dd1(-1+m) - dd2m - p12 t12 + m p12 t12 - m p22 t22) (dd1(-1+m) - \right. \right. \\
& \left. \left. dd2m + t12 - m t12 - p12 t12 + m p12 t12 + m t22 - m p22 t22) (1+\alpha) \right) / \right. \\
& \left. (-1+s(-1+t12 - m t12 + m t22) + (-1+m) t12 \alpha - m t22 \alpha) \right) + \\
& \left( (dd1(-1+m) - dd2m - p12 t12 + m p12 t12 - m p22 t22) \right. \\
& \left. (dd1(-1+m) - dd2m + t12 - m t12 - p12 t12 + m p12 t12 + m t22 - m p22 t22) \right) / \\
& \left( 1 + (1 + (-1+m) t12 - m t22) \alpha + s(1 + (-1+m) t12 - m t22) (1+\alpha) \right) - \\
& \left( r(1+s)(dd1(-1+m) - dd2m - p12 t12 + m p12 t12 - m p22 t22) \right. \\
& \left. (-1+dd1(-1+m) - dd2m + p12 - m p12 + m p22 + t12 - m t12 - p12 t12 + m p12 t12 + m t22 - m p22 t22) \right) / \\
& \left( 1 + (1 + (-1+m) t12 - m t22) \alpha + s(1 + (-1+m) t12 - m t22) (1+\alpha) \right) + \\
& \left( (1+s)(dd1(-1+m) - dd2m + t12 - m t12 - p12 t12 + m p12 t12 + m t22 - m p22 t22) \right. \\
& \left. (-1+dd1(-1+m) - dd2m + p12 - m p12 + m p22 + t12 - m t12 - p12 t12 + m p12 t12 + m t22 - m p22 t22) \right) / \\
& \left( 1 + (1 + (-1+m) t12 - m t22) \alpha + s(1 + (-1+m) t12 - m t22) (1+\alpha) \right) - \\
& \left( 2(dd1 - dd1m + dd2m - t12 + m t12 + p12 t12 - m p12 t12 - m t22 + m p22 t22)^2 \right) / \\
& \left( 1 + (1 + (-1+m) t12 - m t22) \alpha + s(1 + (-1+m) t12 - m t22) (1+\alpha) \right) + \\
& \left( (-1+r)(1+s)(dd1(-1+m) - dd2m + p12 - m p12 + m p22 - p12 t12 + \right. \\
& \left. m p12 t12 - m p22 t22) (dd1(-1+m) - dd2m + t12 - m t12 - p12 t12 + m p12 t12 + m t22 - m p22 t22) (1+\alpha) \right) / \\
& \left( 1 + (1 + (-1+m) t12 - m t22) \alpha + s(1 + (-1+m) t12 - m t22) (1+\alpha) \right) + \\
& \left( (1+s)(dd1(-1+m) - dd2m + t12 - m t12 - p12 t12 + m p12 t12 + m t22 - m p22 t22) \right. \\
& \left. (-1+dd1(-1+m) - dd2m + p12 - m p12 + m p22 + t12 - m t12 - p12 t12 + m p12 t12 + m t22 - m p22 t22) (1+\alpha) \right) / \\
& \left( 1 + (1 + (-1+m) t12 - m t22) \alpha + s(1 + (-1+m) t12 - m t22) (1+\alpha) \right) - \\
& \left( r(1+s)(dd1(-1+m) - dd2m - p12 t12 + m p12 t12 - m p22 t22) \right.
\end{aligned}$$

$$\begin{aligned}
& \left( -1 + dd1(-1 + m) - dd2m + p12 - mp12 + mp22 + t12 - \right. \\
& \quad \left. mt12 - p12t12 + mp12t12 + mt22 - mp22t22 \right) / \\
& \left( 1 + s(1 + (-1 + m)t12 - mt22) + mt22\alpha + t12(\alpha - m\alpha) \right) + \left( (-1 + r)(1 + s) \right. \\
& \quad \left( dd1(-1 + m) - dd2m + p12 - mp12 + mp22 - p12t12 + mp12t12 - mp22t22 \right) \\
& \quad \left( dd1(-1 + m) - dd2m + t12 - mt12 - p12t12 + mp12t12 + mt22 - mp22t22 \right) \\
& \quad \left. (1 + \alpha) \right) / \left( 1 + s(1 + (-1 + m)t12 - mt22) + mt22\alpha + t12(\alpha - m\alpha) \right) + \\
& \frac{1}{(1 + s(1 + (-1 + m)t12 - mt22))^4} (1 + s)(-1 + s(-1 + t12 - mt12 + mt22))^2 \\
& \left( (r(dd1(-1 + m) - dd2m + p12 - mp12 + mp22 - p12t12 + mp12t12 - mp22t22) \right. \\
& \quad (dd1(-1 + m) - dd2m + t12 - mt12 - p12t12 + mp12t12 + mt22 - mp22t22) \\
& \quad \left. (1 + \alpha) \right) / (-1 + s(-1 + t12 - mt12 + mt22) + (-1 + m)t12\alpha - mt22\alpha) + \\
& \left( (-1 + r)(dd1(-1 + m) - dd2m - p12t12 + mp12t12 - mp22t22) \right. \\
& \quad \left( -1 + dd1(-1 + m) - dd2m + p12 - mp12 + mp22 + t12 - \right. \\
& \quad \left. mt12 - p12t12 + mp12t12 + mt22 - mp22t22 \right) / \\
& \left( 1 + (1 + (-1 + m)t12 - mt22)\alpha + s(1 + (-1 + m)t12 - mt22)(1 + \alpha) \right) + \\
& \left( (dd1(-1 + m) - dd2m + t12 - mt12 - p12t12 + mp12t12 + mt22 - mp22t22) \right. \\
& \quad \left( -1 + dd1(-1 + m) - dd2m + p12 - mp12 + mp22 + t12 - \right. \\
& \quad \left. mt12 - p12t12 + mp12t12 + mt22 - mp22t22 \right) / \\
& \left( 1 + (1 + (-1 + m)t12 - mt22)\alpha + s(1 + (-1 + m)t12 - mt22)(1 + \alpha) \right) - \\
& \left( r(dd1(-1 + m) - dd2m + p12 - mp12 + mp22 - p12t12 + mp12t12 - mp22t22) \right. \\
& \quad (dd1(-1 + m) - dd2m + t12 - mt12 - p12t12 + mp12t12 + mt22 - mp22t22)(1 + \\
& \quad \alpha) \right) / \left( 1 + (1 + (-1 + m)t12 - mt22)\alpha + s(1 + (-1 + m)t12 - mt22)(1 + \alpha) \right) + \\
& \left( (1 + s)(dd1(-1 + m) - dd2m + p12 - mp12 + mp22 - p12t12 + mp12t12 - mp22t22) \right. \\
& \quad \left( -1 + dd1(-1 + m) - dd2m + p12 - mp12 + mp22 + t12 - \right. \\
& \quad \left. mt12 - p12t12 + mp12t12 + mt22 - mp22t22 \right) (1 + \alpha) \right) / \\
& \left( 1 + (1 + (-1 + m)t12 - mt22)\alpha + s(1 + (-1 + m)t12 - mt22)(1 + \alpha) \right) + \\
& \left( (dd1(-1 + m) - dd2m + t12 - mt12 - p12t12 + mp12t12 + mt22 - mp22t22) \right. \\
& \quad \left( -1 + dd1(-1 + m) - dd2m + p12 - mp12 + mp22 + t12 - \right. \\
& \quad \left. mt12 - p12t12 + mp12t12 + mt22 - mp22t22 \right) (1 + \alpha) \right) / \\
& \left( 1 + (1 + (-1 + m)t12 - mt22)\alpha + s(1 + (-1 + m)t12 - mt22)(1 + \alpha) \right) - \\
& \left( 2(1 + s)(-1 + dd1(-1 + m) - dd2m + p12 - mp12 + mp22 + t12 - \right. \\
& \quad \left. mt12 - p12t12 + mp12t12 + mt22 - mp22t22)^2(1 + \alpha) \right) / \\
& \left( 1 + (1 + (-1 + m)t12 - mt22)\alpha + s(1 + (-1 + m)t12 - mt22)(1 + \alpha) \right) + \\
& \left( (-1 + r)(dd1(-1 + m) - dd2m - p12t12 + mp12t12 - mp22t22) \right. \\
& \quad \left( -1 + dd1(-1 + m) - dd2m + p12 - mp12 + mp22 + t12 - \right. \\
& \quad \left. mt12 - p12t12 + mp12t12 + mt22 - mp22t22 \right) / \\
& \left( 1 + s(1 + (-1 + m)t12 - mt22) + mt22\alpha + t12(\alpha - m\alpha) \right) + \\
& \left( (1 + s)(dd1(-1 + m) - dd2m + p12 - mp12 + mp22 - p12t12 + mp12t12 - mp22t22) \right. \\
& \quad \left( -1 + dd1(-1 + m) - dd2m + p12 - mp12 + mp22 + t12 - \right. \\
& \quad \left. mt12 - p12t12 + mp12t12 + mt22 - mp22t22 \right) / \\
& \left( 1 + s(1 + (-1 + m)t12 - mt22) + mt22\alpha + t12(\alpha - m\alpha) \right) \Big) \\
& \left( - \left( (dd1(-1 + m) - dd2m - p12t12 + mp12t12 - mp22t22)(dd1(-1 + m) - \right. \right. \\
& \quad \left. \left. dd2m + t12 - mt12 - p12t12 + mp12t12 + mt22 - mp22t22)(1 + \alpha) \right) / \right. \\
& \quad \left. (-1 + s(-1 + t12 - mt12 + mt22) + (-1 + m)t12\alpha - mt22\alpha) \right) + \\
& \left( 2(dd1 - dd1m + dd2m + p12t12 - mp12t12 + mp22t22)^2(1 + \alpha) \right) / \\
& \left( -1 + s(-1 + t12 - mt12 + mt22) + (-1 + m)t12\alpha - mt22\alpha \right) + \\
& \left( (dd1(-1 + m) - dd2m - p12t12 + mp12t12 - mp22t22) \right. \\
& \quad \left. (dd1(-1 + m) - dd2m + t12 - mt12 - p12t12 + mp12t12 + mt22 - mp22t22) \right) /
\end{aligned}$$

$$\begin{aligned}
& \left( (1 + (1 + (-1 + m) t_{12} - m t_{22}) \alpha + s (1 + (-1 + m) t_{12} - m t_{22}) (1 + \alpha)) + \right. \\
& \left( (-1 + r) (1 + s) (dd_1 (-1 + m) - dd_2 m - p_{12} t_{12} + m p_{12} t_{12} - m p_{22} t_{22}) \right. \\
& \quad \left. (-1 + dd_1 (-1 + m) - dd_2 m + p_{12} - m p_{12} + m p_{22} + t_{12} - \right. \\
& \quad \left. m t_{12} - p_{12} t_{12} + m p_{12} t_{12} + m t_{22} - m p_{22} t_{22})) / \right. \\
& \left( (1 + (1 + (-1 + m) t_{12} - m t_{22}) \alpha + s (1 + (-1 + m) t_{12} - m t_{22}) (1 + \alpha)) - \right. \\
& \left( r (1 + s) (dd_1 (-1 + m) - dd_2 m + p_{12} - m p_{12} + m p_{22} - p_{12} t_{12} + m p_{12} t_{12} - m p_{22} t_{22}) \right. \\
& \quad \left. (dd_1 (-1 + m) - dd_2 m + t_{12} - m t_{12} - p_{12} t_{12} + m p_{12} t_{12} + m t_{22} - m p_{22} t_{22}) (1 + \right. \\
& \quad \left. \alpha)) / (1 + (1 + (-1 + m) t_{12} - m t_{22}) \alpha + s (1 + (-1 + m) t_{12} - m t_{22}) (1 + \alpha)) + \right. \\
& \left( (1 + s) (dd_1 (-1 + m) - dd_2 m - p_{12} t_{12} + m p_{12} t_{12} - m p_{22} t_{22}) \right. \\
& \quad \left. (dd_1 (-1 + m) - dd_2 m + p_{12} - m p_{12} + m p_{22} - p_{12} t_{12} + m p_{12} t_{12} - m p_{22} t_{22})) / \right. \\
& \left( (1 + s (1 + (-1 + m) t_{12} - m t_{22}) + m t_{22} \alpha + t_{12} (\alpha - m \alpha)) + \right. \\
& \left( (-1 + r) (1 + s) (dd_1 (-1 + m) - dd_2 m - p_{12} t_{12} + m p_{12} t_{12} - m p_{22} t_{22}) \right. \\
& \quad \left. (-1 + dd_1 (-1 + m) - dd_2 m + p_{12} - m p_{12} + m p_{22} + t_{12} - \right. \\
& \quad \left. m t_{12} - p_{12} t_{12} + m p_{12} t_{12} + m t_{22} - m p_{22} t_{22})) / \right. \\
& \left( (1 + s (1 + (-1 + m) t_{12} - m t_{22}) + m t_{22} \alpha + t_{12} (\alpha - m \alpha)) + \right. \\
& \left( (1 + s) (dd_1 (-1 + m) - dd_2 m - p_{12} t_{12} + m p_{12} t_{12} - m p_{22} t_{22}) \right. \\
& \quad \left. (dd_1 (-1 + m) - dd_2 m + p_{12} - m p_{12} + m p_{22} - p_{12} t_{12} + m p_{12} t_{12} - m p_{22} t_{22}) \right. \\
& \quad \left. (1 + \alpha)) / (1 + s (1 + (-1 + m) t_{12} - m t_{22}) + m t_{22} \alpha + t_{12} (\alpha - m \alpha)) \right) \Bigg), \\
& -p_{22} + (p_{22} (1 + s t_{22}) (2 + 2 (1 + dd_2) \alpha + (dd_2 - 2 (-1 + t_{22}) t_{22}) \alpha^2 + \\
& \quad 2 s^2 t_{22}^2 (1 + \alpha) + s (-2 t_{22}^2 \alpha^2 + dd_2 \alpha (2 + \alpha) + 2 t_{22} (2 + 2 \alpha + \alpha^2))) + \\
& dd_2 (2 s^3 t_{22}^2 (1 + \alpha) - \alpha (1 + t_{22} \alpha) + s (2 + (1 + 2 dd_2 - t_{22}) \alpha + (dd_2 - 2 t_{22}^2) \alpha^2) + \\
& \quad s^2 (-2 t_{22}^2 \alpha^2 + dd_2 \alpha (2 + \alpha) + t_{22} (4 + 3 \alpha + \alpha^2))) - \\
& m^3 (t_{12} - t_{22}) (p_{12}^2 (1 + s) (1 + s t_{12}) \alpha (2 + \alpha) + p_{22}^2 (1 + s) (1 + s t_{22}) \alpha (2 + \alpha) - \\
& \quad 2 (dd_1 - dd_2) s (t_{12} - t_{22}) (s - \alpha) (s + \alpha + s \alpha) + \\
& \quad p_{22} ((-t_{12} + t_{22}) \alpha^2 + 2 s^3 (t_{12} - t_{22}) t_{22} (1 + \alpha) - \\
& \quad s \alpha (dd_1 (2 + \alpha) - dd_2 (2 + \alpha) + (t_{12} - t_{22}) (-1 + 2 t_{22} \alpha)) + s^2 (2 t_{22}^2 \alpha^2 - \\
& \quad (dd_1 - dd_2) \alpha (2 + \alpha) - t_{22} (1 + \alpha) (2 + \alpha) + t_{12} (2 + 3 \alpha + (1 - 2 t_{22}) \alpha^2))) - \\
& p_{12} (2 s^3 t_{12} (t_{12} - t_{22}) (1 + \alpha) + s \alpha (4 p_{22} + t_{12} + 2 p_{22} t_{12} - t_{22} + \\
& \quad 2 p_{22} t_{22} + 2 p_{22} \alpha + p_{22} t_{12} \alpha - 2 t_{12}^2 \alpha + p_{22} t_{22} \alpha + 2 t_{12} t_{22} \alpha - \\
& \quad dd_1 (2 + \alpha) + dd_2 (2 + \alpha)) + \alpha ((-t_{12} + t_{22}) \alpha + 2 p_{22} (2 + \alpha)) + \\
& \quad s^2 (-2 t_{12}^2 \alpha^2 + t_{12} (2 + (3 + 2 p_{22}) \alpha + (1 + p_{22} + 2 t_{22}) \alpha^2) + \\
& \quad (2 + \alpha) ((-dd_1 + dd_2) \alpha + t_{22} (-1 + (-1 + p_{22}) \alpha))) + \\
& m (2 dd_1 s - 2 dd_2 s + 4 dd_2 s^2 t_{12} + 4 dd_1 s^2 t_{22} - 8 dd_2 s^2 t_{22} + 4 dd_2 s^3 t_{12} t_{22} + \\
& \quad 2 dd_1 s^3 t_{22}^2 - 6 dd_2 s^3 t_{22}^2 - dd_1 \alpha + dd_2 \alpha + dd_1 s \alpha - dd_2 s \alpha + \\
& \quad 4 dd_1 dd_2 s \alpha - 4 dd_2^2 s \alpha + 4 dd_1 dd_2 s^2 \alpha - 4 dd_2^2 s^2 \alpha - dd_2 s t_{12} \alpha + \\
& \quad 3 dd_2 s^2 t_{12} \alpha - dd_1 s t_{22} \alpha + 2 dd_2 s t_{22} \alpha + 3 dd_1 s^2 t_{22} \alpha - 6 dd_2 s^2 t_{22} \alpha + \\
& \quad 4 dd_2 s^3 t_{12} t_{22} \alpha + 2 dd_1 s^3 t_{22}^2 \alpha - 6 dd_2 s^3 t_{22}^2 \alpha + 2 dd_1 dd_2 s \alpha^2 - \\
& \quad 2 dd_2^2 s \alpha^2 + 2 dd_1 dd_2 s^2 \alpha^2 - 2 dd_2^2 s^2 \alpha^2 - dd_2 t_{12} \alpha^2 + dd_2 s^2 t_{12} \alpha^2 - \\
& \quad dd_1 t_{22} \alpha^2 + 2 dd_2 t_{22} \alpha^2 + dd_1 s^2 t_{22} \alpha^2 - 2 dd_2 s^2 t_{22} \alpha^2 - 4 dd_2 s t_{12} t_{22} \alpha^2 - \\
& \quad 4 dd_2 s^2 t_{12} t_{22} \alpha^2 - 2 dd_1 s t_{22}^2 \alpha^2 + 6 dd_2 s t_{22}^2 \alpha^2 - 2 dd_1 s^2 t_{22}^2 \alpha^2 + \\
& \quad 6 dd_2 s^2 t_{22}^2 \alpha^2 - p_{22}^2 (1 + s) (t_{12} - t_{22}) (1 + s t_{22}) \alpha (2 + \alpha) + \\
& \quad p_{22} (-2 - 2 \alpha + 2 dd_1 \alpha - 4 dd_2 \alpha + t_{12} \alpha - t_{22} \alpha + dd_1 \alpha^2 - 2 dd_2 \alpha^2 + 2 t_{12} \alpha^2 - \\
& \quad 4 t_{22} \alpha^2 - 3 t_{12} t_{22} \alpha^2 + 5 t_{22}^2 \alpha^2 + 2 s^3 (2 t_{12} - 3 t_{22}) t_{22}^2 (1 + \alpha) - \\
& \quad s (t_{22}^2 \alpha - 6 t_{22}^3 \alpha^2 - (dd_1 - 2 dd_2) \alpha (2 + \alpha) + \\
& \quad t_{22} (10 + (11 - 2 dd_1 + 2 dd_2) \alpha + (4 - dd_1 + dd_2) \alpha^2) + \\
& \quad t_{12} (-4 + (-5 + 2 dd_2 - t_{22}) \alpha + (-2 + dd_2 + 4 t_{22}^2) \alpha^2)) -
\end{aligned}$$

$$\begin{aligned}
& s^2 \left( t_{12} (4 t_{22}^2 \alpha^2 + dd2 \alpha (2 + \alpha) - t_{22} (8 + 9 \alpha + 3 \alpha^2)) + \right. \\
& \quad \left. t_{22} (-6 t_{22}^2 \alpha^2 - (dd1 - dd2) \alpha (2 + \alpha) + t_{22} (14 + 15 \alpha + 5 \alpha^2)) \right) + \\
& p_{12} (2 + 2 \alpha + 2 dd2 \alpha - t_{12} \alpha + 2 p_{22} t_{12} \alpha + t_{22} \alpha - 2 p_{22} t_{22} \alpha + dd2 \alpha^2 + \\
& \quad p_{22} t_{12} \alpha^2 + 2 t_{22} \alpha^2 - p_{22} t_{22} \alpha^2 - t_{12} t_{22} \alpha^2 - t_{22}^2 \alpha^2 + 2 s^3 t_{12} t_{22}^2 (1 + \alpha) + \\
& \quad s (dd2 \alpha (2 + \alpha) - t_{22} (-4 + (-5 + 2 dd2 + 2 p_{22}) \alpha + (-2 + dd2 + p_{22}) \alpha^2) + \\
& \quad \quad t_{12} (2 + (1 + 4 dd2 - t_{22} + 2 p_{22} (1 + t_{22})) \alpha + \\
& \quad \quad (2 dd2 + p_{22} + p_{22} t_{22} - 2 t_{22}^2) \alpha^2) - t_{22}^2 \alpha (-1 + p_{22} (2 + \alpha))) + \\
& \quad s^2 (-t_{22} (2 + \alpha) (dd2 \alpha + t_{22} (-1 + (-1 + p_{22}) \alpha)) + t_{12} (-2 t_{22}^2 \alpha^2 + \\
& \quad \quad 2 dd2 \alpha (2 + \alpha) + t_{22} (4 + (2 + p_{22}) \alpha + (1 + p_{22}) \alpha (1 + \alpha)))) + \\
& m^2 (4 dd1 s^2 t_{12} - 4 dd2 s^2 t_{12} + 2 dd2 s^3 t_{12}^2 - 4 dd1 s^2 t_{22} + 4 dd2 s^2 t_{22} + \\
& \quad 4 dd1 s^3 t_{12} t_{22} - 8 dd2 s^3 t_{12} t_{22} - 4 dd1 s^3 t_{22}^2 + 6 dd2 s^3 t_{22}^2 + \\
& \quad 2 dd1^2 s \alpha - 4 dd1 dd2 s \alpha + 2 dd2^2 s \alpha + 2 dd1^2 s^2 \alpha - 4 dd1 dd2 s^2 \alpha + \\
& \quad 2 dd2^2 s^2 \alpha - dd1 s t_{12} \alpha + dd2 s t_{12} \alpha + 3 dd1 s^2 t_{12} \alpha - 3 dd2 s^2 t_{12} \alpha + \\
& \quad 2 dd2 s^3 t_{12}^2 \alpha + dd1 s t_{22} \alpha - dd2 s t_{22} \alpha - 3 dd1 s^2 t_{22} \alpha + \\
& \quad 3 dd2 s^2 t_{22} \alpha + 4 dd1 s^3 t_{12} t_{22} \alpha - 8 dd2 s^3 t_{12} t_{22} \alpha - \\
& \quad 4 dd1 s^3 t_{22}^2 \alpha + 6 dd2 s^3 t_{22}^2 \alpha + dd1^2 s \alpha^2 - 2 dd1 dd2 s \alpha^2 + \\
& \quad dd2^2 s \alpha^2 + dd1^2 s^2 \alpha^2 - 2 dd1 dd2 s^2 \alpha^2 + dd2^2 s^2 \alpha^2 - dd1 t_{12} \alpha^2 + \\
& \quad dd2 t_{12} \alpha^2 + dd1 s^2 t_{12} \alpha^2 - dd2 s^2 t_{12} \alpha^2 - 2 dd2 s t_{12}^2 \alpha^2 - \\
& \quad 2 dd2 s^2 t_{12}^2 \alpha^2 + dd1 t_{22} \alpha^2 - dd2 t_{22} \alpha^2 - dd1 s^2 t_{22} \alpha^2 + dd2 s^2 t_{22} \alpha^2 - \\
& \quad 4 dd1 s t_{12} t_{22} \alpha^2 + 8 dd2 s t_{12} t_{22} \alpha^2 - 4 dd1 s^2 t_{12} t_{22} \alpha^2 + \\
& \quad 8 dd2 s^2 t_{12} t_{22} \alpha^2 + 4 dd1 s t_{22}^2 \alpha^2 - 6 dd2 s t_{22}^2 \alpha^2 + 4 dd1 s^2 t_{22}^2 \alpha^2 - \\
& \quad 6 dd2 s^2 t_{22}^2 \alpha^2 + p_{12}^2 (1 + s) (1 + s t_{12}) (t_{12} - t_{22}) \alpha (2 + \alpha) + \\
& \quad 2 p_{22}^2 (1 + s) (t_{12} - t_{22}) (1 + s t_{22}) \alpha (2 + \alpha) + \\
& \quad p_{22} (2 s^3 t_{22} (t_{12}^2 - 4 t_{12} t_{22} + 3 t_{22}^2) (1 + \alpha) - \\
& \quad \quad \alpha (dd1 (2 + \alpha) - dd2 (2 + \alpha) + (t_{12} - t_{22}) (1 + (2 + t_{12} - 4 t_{22}) \alpha)) - \\
& \quad \quad s (-2 t_{22}^2 \alpha + 6 t_{22}^3 \alpha^2 + (dd1 - dd2) \alpha (2 + \alpha) + t_{12}^2 \alpha (-1 + 2 t_{22} \alpha) + t_{22} \\
& \quad \quad (-4 + (-5 + 2 dd2) \alpha + (-2 + dd2) \alpha^2) + t_{12} (4 + (5 + 2 dd1 - 4 dd2 + 3 t_{22}) \\
& \quad \quad \alpha + (2 + dd1 - 2 dd2 - 8 t_{22}^2) \alpha^2)) + s^2 (t_{12}^2 (2 + 3 \alpha + (1 - 2 t_{22}) \alpha^2) + \\
& \quad \quad t_{22} (-6 t_{22}^2 \alpha^2 - dd2 \alpha (2 + \alpha) + 2 t_{22} (5 + 6 \alpha + 2 \alpha^2)) + \\
& \quad \quad t_{12} (8 t_{22}^2 \alpha^2 - (dd1 - 2 dd2) \alpha (2 + \alpha) - t_{22} (12 + 15 \alpha + 5 \alpha^2)))) + \\
& p_{12} (2 dd1 \alpha - 2 dd2 \alpha + t_{12} \alpha - 6 p_{22} t_{12} \alpha - t_{22} \alpha + 6 p_{22} t_{22} \alpha + dd1 \alpha^2 - \\
& \quad dd2 \alpha^2 + 2 t_{12} \alpha^2 - 3 p_{22} t_{12} \alpha^2 - t_{12}^2 \alpha^2 - 2 t_{22} \alpha^2 + 3 p_{22} t_{22} \alpha^2 - t_{12} t_{22} \alpha^2 + \\
& \quad 2 t_{22}^2 \alpha^2 + 4 s^3 t_{12} (t_{12} - t_{22}) t_{22} (1 + \alpha) - s (- (dd1 - dd2) \alpha (2 + \alpha) + \\
& \quad \quad t_{22} (4 + (5 + 2 dd1 - 4 dd2 - 6 p_{22}) \alpha + (2 + dd1 - 2 dd2 - 3 p_{22}) \alpha^2) + \\
& \quad \quad t_{12} (-4 + (-5 - 4 dd1 + 6 dd2 + 6 p_{22} - 3 t_{22} + 2 p_{22} t_{22}) \alpha + \\
& \quad \quad (-2 - 2 dd1 + 3 dd2 + 3 p_{22} + p_{22} t_{22} - 4 t_{22}^2) \alpha^2) - \\
& \quad \quad 2 t_{22}^2 \alpha (-1 + p_{22} (2 + \alpha)) + t_{12}^2 \alpha (1 + 4 t_{22} \alpha + p_{22} (2 + \alpha))) - \\
& \quad s^2 (t_{12}^2 (-4 + (-3 + 2 p_{22}) \alpha + (-1 + p_{22} + 4 t_{22}) \alpha^2) + \\
& \quad \quad t_{22} (2 + \alpha) ((dd1 - 2 dd2) \alpha + t_{22} (2 - 2 (-1 + p_{22}) \alpha)) - t_{12} \alpha \\
& \quad \quad (2 dd1 (2 + \alpha) - 3 dd2 (2 + \alpha) + t_{22} (3 + \alpha + 4 t_{22} \alpha - p_{22} (2 + \alpha)))))) / \\
& (2 (1 + m s (t_{12} - t_{22}) + s t_{22}) (1 + s t_{22} + m (t_{12} - t_{22}) (s - \alpha) + \alpha - t_{22} \alpha) \\
& \quad (1 + t_{22} \alpha + s t_{22} (1 + \alpha) + m (t_{12} - t_{22}) (s + \alpha + s \alpha))), \\
& -t_{22} + ((1 + s) (m (t_{12} - t_{22}) + t_{22}) (2 + \alpha + 2 p_{22} \alpha + t_{22} \alpha - 2 p_{22} t_{22} \alpha + \\
& \quad p_{22} \alpha^2 + t_{22} \alpha^2 - p_{22} t_{22} \alpha^2 - t_{22}^2 \alpha^2 + 2 s^2 t_{22}^2 (1 + \alpha) + \\
& \quad s (dd2 \alpha (2 + \alpha) + t_{22} (4 + (3 - 2 dd2 + 2 p_{22}) \alpha + (1 - dd2 + p_{22}) \alpha^2) - \\
& \quad \quad t_{22}^2 \alpha (-1 + \alpha + p_{22} (2 + \alpha))) + m^2 (t_{12} - t_{22}) (2 s^2 (t_{12} - t_{22}) (1 + \alpha) + \\
& \quad \quad s \alpha (t_{12} - 2 p_{12} t_{12} - t_{22} + 2 p_{22} t_{22} - t_{12} \alpha - p_{12} t_{12} \alpha + t_{22} \alpha + p_{22} t_{22} \alpha - dd1 \\
& \quad \quad (2 + \alpha) + dd2 (2 + \alpha)) + \alpha ((-t_{12} + t_{22}) \alpha - p_{12} (2 + \alpha) + p_{22} (2 + \alpha))) + \\
& \quad m (4 s^2 (t_{12} - t_{22}) t_{22} (1 + \alpha) - \alpha (p_{22} (1 + t_{12} - 2 t_{22}) (2 + \alpha) + p_{12} \\
& \quad \quad (-1 + t_{22}) (2 + \alpha) + (t_{12} - t_{22}) (-1 - \alpha + 2 t_{22} \alpha)) - \\
& \quad s (- (dd1 - dd2) \alpha (2 + \alpha) + t_{22} (4 + (3 + 2 dd1 - 4 dd2 + 2 p_{22}) \alpha +
\end{aligned}$$

$$\begin{aligned}
& \left( (1 + dd1 - 2 dd2 + p22) \alpha^2 \right) + t12 \left( -4 + (-3 + 2 dd2 + 2 p12 (-1 + t22) - \right. \\
& \quad \left. 2 t22 + 2 p22 t22) \alpha + (-1 + dd2 + p12 (-1 + t22) + 2 t22 + \right. \\
& \quad \left. p22 t22) \alpha^2 \right) - 2 t22^2 \alpha (-1 + \alpha + p22 (2 + \alpha)) \Big) \Big) / \\
& \left( 2 (1 + m s (t12 - t22) + s t22) (1 + s t22 + m (t12 - t22) (s - \alpha) + \alpha - t22 \alpha) \right. \\
& \quad \left. (1 + t22 \alpha + s t22 (1 + \alpha) + m (t12 - t22) (s + \alpha + s \alpha)) \right), \\
& \frac{1}{4} \left( -4 dd2 - \frac{1}{(1 + m s (t12 - t22) + s t22)^2} (1 + s) \right. \\
& \quad \left( (2 (1 + s) (dd2 + dd1 m - dd2 m - m t12 + m p12 t12 - t22 + m t22 + p22 t22 - \right. \\
& \quad \left. m p22 t22)^2 \right) / (1 + s t22 + m (t12 - t22) (s - \alpha) + \alpha - t22 \alpha) - \\
& \quad \left( (1 + s) (dd2 (-1 + m) - dd1 m - m p12 t12 - p22 t22 + m p22 t22) \right. \\
& \quad \left. (dd2 (-1 + m) - dd1 m + m t12 - m p12 t12 + t22 - m t22 - p22 t22 + m p22 t22) \right) / \\
& \quad (1 + s t22 + m (t12 - t22) (s - \alpha) + \alpha - t22 \alpha) + \\
& \quad (r (dd2 (-1 + m) - dd1 m - m p12 t12 - p22 t22 + m p22 t22) \\
& \quad (-1 + dd2 (-1 + m) - dd1 m + m p12 + p22 - m p22 + m t12 - m p12 t12 + t22 - m t22 - \\
& \quad p22 t22 + m p22 t22) / (1 + s t22 + m (t12 - t22) (s - \alpha) + \alpha - t22 \alpha) - \\
& \quad ((dd2 (-1 + m) - dd1 m + m t12 - m p12 t12 + t22 - m t22 - p22 t22 + m p22 t22) \\
& \quad (-1 + dd2 (-1 + m) - dd1 m + m p12 + p22 - m p22 + m t12 - m p12 t12 + t22 - m t22 - \\
& \quad p22 t22 + m p22 t22) / (1 + s t22 + m (t12 - t22) (s - \alpha) + \alpha - t22 \alpha) - \\
& \quad ((-1 + r) (dd2 (-1 + m) - dd1 m + m p12 + p22 - m p22 - m p12 t12 - p22 t22 + m p22 t22) \\
& \quad (dd2 (-1 + m) - dd1 m + m t12 - m p12 t12 + t22 - m t22 - p22 t22 + m p22 t22) \\
& \quad (1 + \alpha)) / (1 + s t22 + m (t12 - t22) (s - \alpha) + \alpha - t22 \alpha) - \\
& \quad (1 / (1 + s t22 + m (t12 - t22) (s - \alpha) + \alpha - t22 \alpha)) \\
& \quad (dd2 (-1 + m) - dd1 m + m t12 - m p12 t12 + t22 - m t22 - p22 t22 + m p22 t22) \\
& \quad (-1 + dd2 (-1 + m) - dd1 m + m p12 + p22 - m p22 + m t12 - \\
& \quad m p12 t12 + t22 - m t22 - p22 t22 + m p22 t22) (1 + \alpha) + \\
& \quad (r (dd2 (-1 + m) - dd1 m - m p12 t12 - p22 t22 + m p22 t22) (-1 + dd2 (-1 + m) - dd1 m + \\
& \quad m p12 + p22 - m p22 + m t12 - m p12 t12 + t22 - m t22 - p22 t22 + m p22 t22)) / \\
& \quad (1 + t22 \alpha + s t22 (1 + \alpha) + m (t12 - t22) (s + \alpha + s \alpha)) - \\
& \quad ((1 + s) (dd2 (-1 + m) - dd1 m - m p12 t12 - p22 t22 + m p22 t22) \\
& \quad (dd2 (-1 + m) - dd1 m + m t12 - m p12 t12 + t22 - m t22 - p22 t22 + m p22 t22) \\
& \quad (1 + \alpha)) / (1 + t22 \alpha + s t22 (1 + \alpha) + m (t12 - t22) (s + \alpha + s \alpha)) - \\
& \quad ((-1 + r) (dd2 (-1 + m) - dd1 m + m p12 + p22 - m p22 - m p12 t12 - p22 t22 + m p22 t22) \\
& \quad (dd2 (-1 + m) - dd1 m + m t12 - m p12 t12 + t22 - m t22 - p22 t22 + m p22 t22) \\
& \quad (1 + \alpha)) / (1 + t22 \alpha + s t22 (1 + \alpha) + m (t12 - t22) (s + \alpha + s \alpha)) \Big) \\
& \left( (r (1 + s) (dd2 (-1 + m) - dd1 m - m p12 t12 - p22 t22 + m p22 t22) \right. \\
& \quad (-1 + dd2 (-1 + m) - dd1 m + m p12 + p22 - m p22 + m t12 - \\
& \quad m p12 t12 + t22 - m t22 - p22 t22 + m p22 t22) / \\
& \quad (1 + s t22 + m (t12 - t22) (s - \alpha) + \alpha - t22 \alpha) - ((-1 + r) (1 + s) \\
& \quad (dd2 (-1 + m) - dd1 m + m p12 + p22 - m p22 - m p12 t12 - p22 t22 + m p22 t22) \\
& \quad (dd2 (-1 + m) - dd1 m + m t12 - m p12 t12 + t22 - m t22 - p22 t22 + m p22 t22) \\
& \quad (1 + \alpha)) / (1 + s t22 + m (t12 - t22) (s - \alpha) + \alpha - t22 \alpha) - \\
& \quad (1 / (1 + s t22 + m (t12 - t22) (s - \alpha) + \alpha - t22 \alpha)) \\
& \quad (dd2 (-1 + m) - dd1 m + m p12 + p22 - m p22 - m p12 t12 - p22 t22 + m p22 t22) \\
& \quad (-1 + dd2 (-1 + m) - dd1 m + m p12 + p22 - m p22 + m t12 - \\
& \quad m p12 t12 + t22 - m t22 - p22 t22 + m p22 t22) (1 + \alpha) + \\
& \quad \left. \left( 2 (dd2 + dd1 m - dd2 m - m p12 - p22 + m p22 + m p12 t12 + p22 t22 - m p22 t22)^2 \right) / \right. \\
& \quad \left. (1 + t22 \alpha + s t22 (1 + \alpha) + m (t12 - t22) (s + \alpha + s \alpha)) - \right. \\
& \quad \left. ((1 + s) (dd2 (-1 + m) - dd1 m - m p12 t12 - p22 t22 + m p22 t22) \right)
\end{aligned}$$







```
Exponent[Numerator[Factor[deltagensym[[5]]]], {p12, t12, dd1, p22, t22, dd2}]
{1, 3, 1, 1, 4, 1}
```

```
Exponent[Numerator[Factor[deltagensym[[6]]]], {p12, t12, dd1, p22, t22, dd2}]
{3, 6, 3, 3, 6, 3}
```

Therefore, `deltagensym[[2]]` and `deltagensym[[5]]` can be used to compute `p12` and `p22` (at equilibrium)

```
Exponent[deltagensym[[3]], r]
```

```
Exponent[deltagensym[[6]], r]
```

```
1
```

There is symmetry between deme 1 and deme 2, as it should be :

```
Simplify[(deltagensym[[1]] /. {p12 → 1 - p11, t12 → 1 - t11} /.
  {p11 → x1, p22 → x1, t11 → y2, t22 → y1, dd1 → z2, dd2 → z1}) +
  (deltagensym[[4]] /. {p12 → 1 - p11, t12 → 1 - t11} /.
  {p11 → x1, p22 → x2, t11 → y1, t22 → y2, dd1 → z1, dd2 → z2})]
```

```
Simplify[(deltagensym[[2]] /. {p12 → 1 - p11, t12 → 1 - t11} /.
  {p11 → x2, p22 → x1, t11 → y2, t22 → y1, dd1 → z2, dd2 → z1}) +
  (deltagensym[[5]] /. {p12 → 1 - p11, t12 → 1 - t11} /.
  {p11 → x1, p22 → x2, t11 → y1, t22 → y2, dd1 → z1, dd2 → z2})]
```

```
Simplify[(deltagensym[[3]] /. {p12 → 1 - p11, t12 → 1 - t11} /.
  {p11 → x2, p22 → x1, t11 → y2, t22 → y1, dd1 → z2, dd2 → z1}) -
  (deltagensym[[6]] /. {p12 → 1 - p11, t12 → 1 - t11} /.
  {p11 → x1, p22 → x2, t11 → y1, t22 → y2, dd1 → z1, dd2 → z2})]
```

```
0
```

```
Simplify[(deltagensym[[3]] /. {p12 → 1 - p11, t12 → 1 - t11} /.
  {p11 → x1, p22 → x2, t11 → y1, t22 → y2, dd1 → z1, dd2 → z2}) -
  (deltagensym[[6]] /. {p12 → 1 - p11, t12 → 1 - t11} /.
  {p11 → x2, p22 → x1, t11 → y2, t22 → y1, dd1 → z2, dd2 → z1})]
```

```
0
```

### 2.3.2 Computing the equilibrium values of (p12,p22) and (dd1,dd2) as functions of (t12,t22) for arbitrary r

The structure of `deltagensym` (see above) suggests that we can obtain (p12, dd1, p22, dd2) as functions of (t12, t22) by solving `{deltagensym[[2]], deltagensym[[5]]} = 0` and ,subsequently, `{deltagensym[[1]], deltagensym[[4]]} = 0`

```
Simplify[Solve[{deltagensym[[2]], deltagensym[[5]]} == 0, {p12, p22}]]
```

The following is (p12, p22) as a function of (t12, t22, dd1, dd2); it is independent of r:

```
p12p22gentdd =
```

$$\{p12 \rightarrow -\left(\left((-1 + t12) t12 (-1 + t22) t22 (1 + s t22) \left(2 s^3 (-1 + t12)^2 (1 + \alpha) + \alpha (1 + t12 \alpha) + s (2 + (4 + 2 dd1 - t12) \alpha + (dd1 + (3 - 2 t12) t12) \alpha^2) + \right.\right.\right.$$

$$\begin{aligned}
& s^2 (4 + 5\alpha + 2dd1\alpha + dd1\alpha^2 - 2t12^2\alpha^2 + t12(-4 - 5\alpha + 2\alpha^2)) + \\
& m^6 s (t12 - t22)^4 (2s^3 (t12^2 t22 + (-1 + t22)^2 t22 + t12(-1 + 2t22 - 2t22^2)) (1 + \alpha) - \\
& 2\alpha(-dd1(2 + \alpha) + dd2(2 + \alpha) + (t12 - t22)(1 + (-1 + t12 + 2t22)\alpha)) + \\
& s\alpha(3dd1(2 + \alpha) - 3dd2(2 + \alpha) - (t12 - t22) \\
& (3 + (-3 + 7t22 - 2t22^2 + 2t12(1 + t22))\alpha)) + \\
& s^2 (-2t22^3\alpha^2 + (dd1 - dd2)\alpha(2 + \alpha) + t22(4 + 5\alpha - \alpha^2) + 3t22^2(-2 - 2\alpha + \alpha^2) + \\
& t12^2(2 + 2\alpha - 2t22\alpha^2) + t12(-4 - 5\alpha + \alpha^2 + 4t22^2\alpha^2 + t22(4 + 4\alpha - 3\alpha^2))) - \\
& m^5 (t12 - t22)^4 (2s^4 (4t12^2 t22 + (-1 + t22)^2(1 + 3t22) + t12(-2 + 2t22 - 5t22^2)) \\
& (1 + \alpha) + 2\alpha(1 + t22\alpha) - 2s\alpha(-2 + 3t12 - 3t22 - 3t12\alpha + 4t12^2 \\
& \alpha + t22\alpha + t12t22\alpha - 5t22^2\alpha - 3dd1(2 + \alpha) + 3dd2(2 + \alpha)) - \\
& s^2 (-8 - 10\alpha - 16dd1\alpha + 18dd2\alpha - 8dd1\alpha^2 + 9dd2\alpha^2 - 19t22^2\alpha^2 + 6t22^3 \\
& \alpha^2 + 8t12^2(1 + t22)\alpha^2 + t22(14 - 4(-1 + dd1)\alpha + (7 - 2dd1)\alpha^2) + 2 \\
& t12(1 + (5 + t22)\alpha + (-4 + 3t22 - 5t22^2)\alpha^2)) + \\
& s^3 (8 + 8\alpha + 4dd1\alpha - 6dd2\alpha + 2dd1\alpha^2 - 3dd2\alpha^2 - 6t22^3\alpha^2 + 3t22^2 \\
& (-4 - 4\alpha + 3\alpha^2) + t12^2(8 + 8\alpha - 8t22\alpha^2) + t22(-4 - 3\alpha^2 + 2dd1\alpha(2 + \alpha)) + 2 \\
& t12(-6 - 7\alpha + \alpha^2 + 5t22^2\alpha^2 + t22(2 + \alpha - 2\alpha^2))) + m^4 (t12 - t22)^2 \\
& (2s^4 (6t12^4 t22 + 3(-1 + t22)^2 t22^2(1 + t22) - t12^3(1 + 3t22 + 18t22^2) - \\
& t12t22(4 + t22 - 7t22^2 + 12t22^3) + t12^2(1 + 5t22 - t22^2 + 21t22^3)) (1 + \alpha) + \\
& (t12 - t22)^2\alpha(5 + t12\alpha + 4t22\alpha) + s(-12t12^4\alpha^2 + 8t22^4\alpha^2 - 2 \\
& (dd1 - dd2)\alpha(2 + \alpha) + t22^3\alpha(7 + 6\alpha) + t12^3\alpha(-7 + (7 + 31t22)\alpha) + \\
& t22^2(-14 + 2(-1 + 7dd1 - 6dd2)\alpha + (-6 + 7dd1 - 6dd2)\alpha^2) + 2 \\
& t22(4 + (3 + 2dd1 - 2dd2)\alpha + (1 + dd1 - dd2)\alpha^2) + t12^2 \\
& (2 + (10 + 14dd1 - 12dd2 + 25t22)\alpha + \\
& (4 + 7dd1 - 6dd2 - 24t22 - 6t22^2)\alpha^2) - t12(t22^2(25 - 11\alpha)\alpha + \\
& 21t22^3\alpha^2 + 2t22(-6 + 2(2 + 9dd1 - 8dd2)\alpha + (-1 + 9dd1 - 8dd2)\alpha^2) + \\
& 2(4 + (3 - 2dd1 + 2dd2)\alpha + (1 - dd1 + dd2)\alpha^2))) + \\
& s^3 (-6t22^5\alpha^2 - (dd1 - dd2)\alpha(2 + \alpha) + t22^4(-6 - 6\alpha + 7\alpha^2) + t22^3 \\
& (-22 + 2(-8 + 5dd1)\alpha + (2 + 5dd1)\alpha^2) + t22^2 \\
& (12 + (13 + 2dd1 - 6dd2)\alpha + (-4 + dd1 - 3dd2)\alpha^2) + t22 \\
& (4 + (3 + 2dd1 - 2dd2)\alpha + (1 + dd1 - dd2)\alpha^2) - 12t12^4(-1 - \alpha + t22\alpha^2) + \\
& t12^3(-14 - 15\alpha + \alpha^2 + 36t22^2\alpha^2 + t22(-36 - 41\alpha + \alpha^2)) + t12^2 \\
& (12 + (11 + 2dd1 - 6dd2)\alpha + (1 + dd1 - 3dd2)\alpha^2 - 42t22^3\alpha^2 + \\
& t22^2(14 + 24\alpha + 11\alpha^2) + t22(30 + 10(4 + dd1)\alpha + (-8 + 5dd1)\alpha^2)) + \\
& t12(-4 + (-3 + 2dd1 - 2dd2)\alpha + (-1 + dd1 - dd2)\alpha^2 + 24t22^4\alpha^2 + \\
& t22^3(16 + 11\alpha - 19\alpha^2) + t22^2(6 - (9 + 20dd1)\alpha + (5 - 10dd1)\alpha^2) + \\
& t22(-24 - 8(3 + dd1 - 2dd2)\alpha + (3 - 4dd1 + 8dd2)\alpha^2))) + \\
& s^2 (15t22^4\alpha^2 - 6t22^5\alpha^2 - 12t12^4(1 + t22)\alpha^2 - 3(dd1 - dd2)\alpha \\
& (2 + \alpha) + t22^3(-26 + (-13 + 10dd1)\alpha + (4 + 5dd1)\alpha^2) + t22^2 \\
& (-4 + 2(2 + 8dd1 - 9dd2)\alpha + (-10 + 8dd1 - 9dd2)\alpha^2) + 3 \\
& t22(4 + (3 + 2dd1 - 2dd2)\alpha + (1 + dd1 - dd2)\alpha^2) + t12^3 \\
& (-8 - (16 + 5t22)\alpha + (7 + 32t22 + 36t22^2)\alpha^2) + t12^2 \\
& (20 + 2(11 + 8dd1 - 9dd2)\alpha + (5 + 8dd1 - 9dd2)\alpha^2 - 42t22^3\alpha^2 + \\
& 5t22^2\alpha(2 + \alpha) + t22(-10 + 5(5 + 2dd1)\alpha + (-34 + 5dd1)\alpha^2)) + t12 \\
& (24t22^4\alpha^2 - 5t22^3\alpha(1 + 8\alpha) + t22^2(44 + (4 - 20dd1)\alpha + (23 - 10dd1)\alpha^2) + \\
& 3(-4 + (-3 + 2dd1 - 2dd2)\alpha + (-1 + dd1 - dd2)\alpha^2) + \\
& t22(-16 + (-26 - 44dd1 + 48dd2)\alpha + (5 - 22dd1 + 24dd2)\alpha^2))) - \\
& m^3 (t12 - t22)^2 (2s^4 t22 (4t12^4 + (-1 + t22)^2 t22 (3 + t22) - 3t12^3 \\
& (1 + 5t22) + t12^2 t22 (11 + 13t22) + t12(-1 - 3t22 + t22^2 - 7t22^3)) (1 + \alpha) +
\end{aligned}$$

$$\begin{aligned}
& 2 \left( 2 + \alpha + t12^3 \alpha^2 + t22^3 \alpha^2 + t22^2 \alpha (2 + \alpha) + t12^2 \alpha (2 - t22 \alpha) - t22 \right. \\
& \quad \left. (3 + 2 \alpha + \alpha^2) + t12 (-1 + t22 (-6 + \alpha) \alpha - 3 t22^2 \alpha^2) \right) + \\
& s^2 \left( t22^4 \alpha^2 - 2 t22^5 \alpha^2 - 8 t12^4 (1 + t22) \alpha^2 - (2 + \alpha) (-2 + 5 dd1 \alpha - 6 dd2 \alpha) + \right. \\
& \quad t22^3 (-16 + 8 (-1 + dd1) \alpha + (15 + 4 dd1) \alpha^2) + t22 \\
& \quad (16 + (11 + 6 dd1 - 12 dd2) \alpha + (4 + 3 dd1 - 6 dd2) \alpha^2) + t22^2 \\
& \quad (-22 + (-11 + 12 dd1 - 6 dd2) \alpha + (-16 + 6 dd1 - 3 dd2) \alpha^2) + 2 \\
& \quad t12^3 (-5 - (7 + 2 t22) \alpha + t22 (16 + 15 t22) \alpha^2) + t12^2 \\
& \quad (14 + (13 + 8 dd1 - 6 dd2) \alpha + (11 + 4 dd1 - 3 dd2) \alpha^2 - 26 t22^3 \alpha^2 - \\
& \quad 3 t22^2 \alpha (-4 + 7 \alpha) + 2 t22 (7 + (19 + 4 dd1) \alpha + 2 (-6 + dd1) \alpha^2)) + t12 \\
& \quad (-14 + (-7 + 10 dd1 - 12 dd2) \alpha + (-5 + 5 dd1 - 6 dd2) \alpha^2 + 14 t22^4 \alpha^2 - \\
& \quad 2 t22^3 \alpha (2 + 11 \alpha) + t22^2 (32 - 4 (1 + 6 dd1) \alpha - 3 (-7 + 4 dd1) \alpha^2) - \\
& \quad 2 t22 (11 + (15 + 16 dd1 - 18 dd2) \alpha + (-1 + 8 dd1 - 9 dd2) \alpha^2)) \left. \right) - \\
& 2 s \left( 4 t12^4 \alpha^2 - t22^4 \alpha^2 - 2 (dd1 - dd2) t22 \alpha (2 + \alpha) - 2 t22^3 \alpha (1 + 2 \alpha) + \right. \\
& \quad 2 (2 + \alpha) (-1 + dd1 \alpha - dd2 \alpha) - t12^3 \alpha (-2 + \alpha + 16 t22 \alpha) + t22^2 \\
& \quad (10 + (4 - 4 dd1 + 2 dd2) \alpha + (3 - 2 dd1 + dd2) \alpha^2) + t12^2 (-2 - \\
& \quad 2 (2 + 2 dd1 - dd2 + 5 t22) \alpha + (-5 - 2 dd1 + dd2 + 14 t22 + 7 t22^2) \alpha^2) + t12 \\
& \quad (-5 t22^2 (-2 + \alpha) \alpha + 6 t22^3 \alpha^2 + 2 t22 (-4 + (2 + 8 dd1 - 6 dd2) \alpha + (-1 + 4 dd1 - \\
& \quad 3 dd2) \alpha^2) + 2 (4 + (2 - 2 dd1 + 2 dd2) \alpha + (1 - dd1 + dd2) \alpha^2)) \left. \right) - \\
& s^3 \left( t22^4 \alpha^2 + 2 t22^5 \alpha^2 + (dd1 - 2 dd2) \alpha (2 + \alpha) + t22^3 (16 + (12 - 8 dd1) \alpha - \right. \\
& \quad (9 + 4 dd1) \alpha^2) + t22^2 (2 + (-1 - 4 dd1 + 2 dd2) \alpha + (8 - 2 dd1 + dd2) \alpha^2) + \\
& \quad t22 (-10 + (-7 + 2 dd1 + 4 dd2) \alpha + (-2 + dd1 + 2 dd2) \alpha^2) + 8 t12^4 \\
& \quad (-1 - \alpha + t22 \alpha^2) + t12^3 (6 + 40 t22 + 6 \alpha + 44 t22 \alpha - 30 t22^2 \alpha^2) + t12^2 \\
& \quad (2 + (3 + 2 dd2) \alpha + (-1 + dd2) \alpha^2 + 26 t22^3 \alpha^2 + t22^2 (-32 - 44 \alpha + 7 \alpha^2) - \\
& \quad 2 t22 (21 + (23 + 4 dd1) \alpha + (1 + 2 dd1) \alpha^2)) + t12 \\
& \quad (-14 t22^4 \alpha^2 + 2 t22^3 \alpha (2 + 5 \alpha) + t22 (26 + (22 - 12 dd2) \alpha - 6 dd2 \alpha^2) + t22^2 \\
& \quad \alpha (16 - 5 \alpha + 12 dd1 (2 + \alpha)) + \alpha (-1 + \alpha - dd1 (2 + \alpha) + 2 dd2 (2 + \alpha))) \left. \right) + \\
& m^2 \left( 2 s t12^6 (1 + s t22) (-\alpha^2 - s \alpha^2 + s^2 (1 + \alpha)) - t12^5 (1 + s t22) \right. \\
& \quad (-\alpha^2 + 2 s^3 (-1 + 10 t22) (1 + \alpha) + s \alpha \\
& \quad (1 + (3 - 20 t22) \alpha) + s^2 (4 + 5 \alpha + (4 - 20 t22) \alpha^2)) + \\
& \quad t12^4 (1 + s t22) (2 s^3 (-6 + 11 t22 + 21 t22^2) (1 + \alpha) + \alpha (1 + \alpha - 6 t22 \alpha) + \\
& \quad s (2 + (1 + 2 dd1 + 10 t22) \alpha + (11 + dd1 - 12 t22 - 42 t22^2) \alpha^2) + s^2 \\
& \quad (-2 + 2 (-2 + dd1) \alpha + (10 + dd1) \alpha^2 - 42 t22^2 \alpha^2 + t22 (28 + 38 \alpha - 6 \alpha^2))) + \\
& \quad t22^2 (4 + \alpha + 2 s^4 (-1 + t22)^2 t22^2 (1 + \alpha) + t22^2 \alpha (1 + 2 \alpha) - t22 (6 + 3 \alpha + 2 \alpha^2) + \\
& \quad s^2 (-2 t22^4 \alpha^2 - 3 (2 + \alpha) (-1 + dd1 \alpha - dd2 \alpha) + t22^3 (-4 + 2 (-1 + dd1) \alpha + \\
& \quad (7 + dd1) \alpha^2) + t22^2 (-14 + (-7 + 8 dd1) \alpha + (-6 + 4 dd1) \alpha^2) + \\
& \quad t22 (6 + (3 - 6 dd2) \alpha + (1 - 3 dd2) \alpha^2)) + s (10 + (4 - 6 dd1 + 4 dd2) \alpha + \\
& \quad (-3 dd1 + 2 dd2) \alpha^2 + t22^3 \alpha (1 + 2 \alpha) + t22^2 (2 + \alpha) (-5 + dd1 \alpha) + \\
& \quad t22 (-6 + (-3 + 6 dd1 - 4 dd2) \alpha + (-2 + 3 dd1 - 2 dd2) \alpha^2)) + s^3 \\
& \quad (-2 t22^4 \alpha^2 + dd2 \alpha (2 + \alpha) + t22^3 (-2 + (-1 + 2 dd1) \alpha + (5 + dd1) \alpha^2) + \\
& \quad t22^2 (-8 + (-5 + 6 dd1) \alpha + (-4 + 3 dd1) \alpha^2) + \\
& \quad t22 (8 + (5 - 6 dd1 - 2 dd2) \alpha - (-1 + 3 dd1 + dd2) \alpha^2)) \left. \right) - t12^3 \\
& \quad (2 - \alpha + 10 t22 \alpha + \alpha^2 - t22 \alpha^2 - 6 t22^2 \alpha^2 + 2 s^4 t22 (-5 - 3 t22 + 24 t22^2 + 18 t22^3) \\
& \quad (1 + \alpha) + s^2 (-6 - 6 (2 + dd1 - dd2) \alpha + 3 t22^3 (6 - 17 \alpha) \alpha + (4 - 3 dd1 + 3 dd2) \\
& \quad \alpha^2 - 36 t22^4 \alpha^2 + 2 t22^2 (19 + 2 (19 + 5 dd1) \alpha + (-14 + 5 dd1) \alpha^2) + \\
& \quad t22 (28 + (23 + 14 dd1 - 12 dd2) \alpha + (29 + 7 dd1 - 6 dd2) \alpha^2)) + s \\
& \quad (6 + (-3 - 6 dd1 + 4 dd2) \alpha + 15 t22^2 (2 - 3 \alpha) \alpha + (5 - 3 dd1 + 2 dd2) \alpha^2 - \\
& \quad 32 t22^3 \alpha^2 + 2 t22 (2 + 2 (4 + 5 dd1 - 2 dd2) \alpha + (11 + 5 dd1 - 2 dd2) \alpha^2)) + s^3 \\
& \quad (-10 + 2 (-5 + dd2) \alpha + dd2 \alpha^2 - 36 t22^4 \alpha^2 + t22^3 (72 + 90 \alpha - 19 \alpha^2) + \\
& \quad t22^2 (70 + (78 + 20 dd1) \alpha + (11 + 10 dd1) \alpha^2) -
\end{aligned}$$

$$\begin{aligned}
& t22 (12 + (19 + 6 dd1 + 4 dd2) \alpha + (-6 + 3 dd1 + 2 dd2) \alpha^2)) + \\
& t12^2 (4 - 2 t22 + \alpha - 5 t22 \alpha + 18 t22^2 \alpha - 3 t22^2 \alpha^2 + 2 t22^3 \alpha^2 + 2 s^4 \\
& t22 (-1 - 5 t22 + 5 t22^2 + 14 t22^3 + 8 t22^4) (1 + \alpha) + s^3 \\
& (-2 + 2 (-1 + dd2) \alpha + dd2 \alpha^2 - 16 t22^5 \alpha^2 + t22^4 (28 + 38 \alpha - 9 \alpha^2) + \\
& 2 t22^3 (25 + 18 (2 + dd1) \alpha + (2 + 9 dd1) \alpha^2) + \\
& t22^2 (16 + (7 - 4 dd1 - 10 dd2) \alpha + (3 - 2 dd1 - 5 dd2) \alpha^2) - \\
& 2 t22 (5 + (7 + 4 dd1 - 2 dd2) \alpha + (-1 + 2 dd1 - dd2) \alpha^2)) + s \\
& (6 + 4 dd2 \alpha + t22^3 (30 - 29 \alpha) \alpha + 2 dd2 \alpha^2 - 3 dd1 \alpha (2 + \alpha) + \\
& t22^2 (-16 + 20 (1 + 2 dd1 - dd2) \alpha + (1 + 20 dd1 - 10 dd2) \alpha^2) + \\
& t22 (18 + (1 - 10 dd1 + 8 dd2) \alpha + (10 - 5 dd1 + 4 dd2) \alpha^2)) + s^2 (t22^4 \\
& (10 - 9 \alpha) \alpha - 16 t22^5 \alpha^2 + t22^3 (-2 + (50 + 36 dd1) \alpha + 9 (-3 + 2 dd1) \alpha^2) + \\
& t22^2 (36 + (45 + 36 dd1 - 30 dd2) \alpha + (7 + 18 dd1 - 15 dd2) \alpha^2) - \\
& 3 t22 (-4 + (2 + 6 dd1 - 4 dd2) \alpha + (3 dd1 - 2 (2 + dd2)) \alpha^2) - \\
& 3 \alpha (1 + dd1 (2 + \alpha) - dd2 (2 + \alpha))) - \\
& t12 t22 (8 - 10 t22 + 2 \alpha - 7 t22 \alpha + 10 t22^2 \alpha - 3 t22 \alpha^2 + t22^2 \alpha^2 + 3 t22^3 \\
& \alpha^2 + 2 s^4 t22 (-1 + t22 + 3 t22^3 + 2 t22^4) (1 + \alpha) + s^2 (6 + 18 dd2 \alpha + 9 dd2 \alpha^2 - \\
& 4 t22^5 \alpha^2 + t22^4 \alpha (1 + \alpha) - 9 dd1 \alpha (2 + \alpha) + t22^3 (-18 + (6 + 20 dd1) \alpha + \\
& (9 + 10 dd1) \alpha^2) + t22 (24 + (9 - 12 dd2) \alpha + (9 - 6 dd2) \alpha^2) + \\
& t22^2 (-8 + (11 + 26 dd1 - 12 dd2) \alpha + (13 dd1 - 6 (3 + dd2)) \alpha^2)) + \\
& s^3 (-2 - 2 (1 + dd1 - 3 dd2) \alpha - (dd1 - 3 dd2) \alpha^2 - 4 t22^5 \alpha^2 + t22^4 \\
& (4 + 5 \alpha - 2 \alpha^2) + t22 (8 + (1 - 10 dd1 - 4 dd2) \alpha + (3 - 5 dd1 - 2 dd2) \alpha^2) + \\
& t22^2 (8 + (9 + 6 dd1 - 4 dd2) \alpha + (-7 + 3 dd1 - 2 dd2) \alpha^2) + \\
& t22^3 \alpha (13 + 8 \alpha + 10 dd1 (2 + \alpha))) + s (3 t22^4 \alpha^2 + t22^3 \alpha (11 + 4 \alpha) + \\
& t22 (6 + (1 + 10 dd1 - 8 dd2) \alpha + (3 + 5 dd1 - 4 dd2) \alpha^2) + \\
& 2 (8 + (2 - 8 dd1 + 6 dd2) \alpha + (-4 dd1 + 3 dd2) \alpha^2) + \\
& 2 t22^2 (-14 - 5 \alpha^2 + 5 dd1 \alpha (2 + \alpha) - 2 dd2 \alpha (2 + \alpha))) + \\
& m (2 t12 t22 - 2 t22^2 - 2 t12 t22^2 + 2 t22^3 + t12^2 \alpha - t12^3 \alpha - 2 t12 t22 \alpha + \\
& 3 t12^2 t22 \alpha + 2 t12^3 t22 \alpha - t22^2 \alpha + t12 t22^2 \alpha - \\
& 6 t12^2 t22^2 \alpha + t22^3 \alpha + 2 t12 t22^3 \alpha + t12^3 \alpha^2 - t12^4 \alpha^2 - \\
& 2 t12^2 t22 \alpha^2 + t12^3 t22 \alpha^2 + 2 t12^4 t22 \alpha^2 - t12 t22^2 \alpha^2 + \\
& 3 t12^2 t22^2 \alpha^2 - 4 t12^3 t22^2 \alpha^2 + t12 t22^3 \alpha^2 + 2 s^4 t12 t22 \\
& (t12^4 (-1 + 2 t22) - t12^3 (-3 + t22 + 6 t22^2) + t22 (-2 + t22 + t22^2 + t22^3) + 3 t12^2 \\
& (-1 - 2 t22 + 4 t22^2 + t22^3) - t12 (-1 - 7 t22 + 7 t22^2 + 4 t22^3 + t22^4)) (1 + \alpha) + \\
& s^3 (-(-1 + t22) t22^3 (2 + \alpha) (-1 + dd1 \alpha) - 2 t12^5 (-1 + 2 t22) (-1 - \alpha + t22 \alpha^2) + \\
& t12^4 (12 t22^3 \alpha^2 + 6 (1 + \alpha) + t22 (2 + 3 \alpha - 4 \alpha^2) - 2 t22^2 (10 + 11 \alpha + \alpha^2)) + t12^3 \\
& (-6 t22^4 \alpha^2 - 6 (1 + \alpha) + t22^3 (24 + 30 \alpha - 14 \alpha^2) - t22 (20 + 2 (11 + dd1) \alpha + \\
& (-2 + dd1) \alpha^2) + t22^2 (26 + (25 + 4 dd1) \alpha + 2 (6 + dd1) \alpha^2)) + t12^2 \\
& (2 t22^5 \alpha^2 + 2 (1 + \alpha) + t22^4 (-8 - 10 \alpha + 3 \alpha^2) - t22^3 (28 + (37 + 12 dd1) \alpha + \\
& (-4 + 6 dd1) \alpha^2) + t22 (18 + (19 + 2 dd1 - 2 dd2) \alpha + (dd1 - dd2) \alpha^2) + \\
& t22^2 (-4 + (3 + 6 dd1 + 2 dd2) \alpha + (-7 + 3 dd1 + dd2) \alpha^2)) + t12 \\
& t22 (-4 + 2 (-2 + dd2) \alpha + dd2 \alpha^2 - 2 t22^4 \alpha^2 + t22^3 (2 + \alpha) \\
& (3 + (3 + 2 dd1) \alpha) + t22^2 (6 + (8 + 6 dd1) \alpha + (-2 + 3 dd1) \alpha^2) - \\
& t22 (2 + 2 (3 + 4 dd1 + dd2) \alpha + (-1 + 4 dd1 + dd2) \alpha^2))) + \\
& s (2 t12^5 (1 - 2 t22) \alpha^2 + (-1 + t22) t22^2 (2 + \alpha) (2 + t22 - dd1 \alpha) + t12^4 \alpha \\
& (1 - 5 \alpha + 14 t22^2 \alpha - t22 (2 + \alpha)) + t12^3 (-2 - (5 + 2 dd1) \alpha + t22^2 (8 - 17 \alpha) \alpha - \\
& (-3 + dd1) \alpha^2 - 10 t22^3 \alpha^2 + 2 t22 (2 + 2 (1 + dd1) \alpha + (7 + dd1) \alpha^2)) + t12 \\
& t22 (2 + (-6 - 8 dd1 + 4 dd2) \alpha + (-4 dd1 + 2 dd2) \alpha^2 + t22^3 \alpha (2 + \alpha) + \\
& 2 t22^2 (-2 + 2 (1 + dd1) \alpha + (-1 + dd1) \alpha^2) + t22 (4 + (5 + 6 dd1 - 4 dd2) \alpha + \\
& (1 + 3 dd1 - 2 dd2) \alpha^2)) + t12^2 (2 + 2 (2 + dd1) \alpha + dd1 \alpha^2 + t22^3 \alpha \\
& (-8 + 11 \alpha) + t22 (-4 + (7 + 6 dd1 - 4 dd2) \alpha + (-8 + 3 dd1 - 2 dd2) \alpha^2) +
\end{aligned}$$

$$\begin{aligned}
& \left( t22^2 (-2 - 2 (7 + 6 dd1 - 2 dd2) \alpha + (1 - 6 dd1 + 2 dd2) \alpha^2) \right) - \\
& s^2 (2 t12^5 (-1 + t22 + 2 t22^2) \alpha^2 + (-1 + t22) t22^2 (2 + \alpha) (-1 + dd1 \alpha + \\
& \quad t22 (-2 + dd1 \alpha)) + t12^4 (-4 - 5 \alpha + 2 t22^2 (1 - 6 \alpha) \alpha + 4 \alpha^2 - 12 t22^3 \alpha^2 + \\
& \quad t22 (8 + 9 \alpha + 7 \alpha^2)) + t12^2 (-4 - (5 + 2 dd1) \alpha + t22^4 (2 - 3 \alpha) \alpha - \\
& \quad dd1 \alpha^2 - 2 t22^5 \alpha^2 + t22^3 (8 + (25 + 12 dd1) \alpha + 3 (-5 + 2 dd1) \alpha^2) + \\
& \quad t22^2 (24 + (23 + 6 dd1 - 6 dd2) \alpha + 3 (3 + dd1 - dd2) \alpha^2) + \\
& \quad t22 (-12 + (-21 - 8 dd1 + 6 dd2) \alpha + (6 - 4 dd1 + 3 dd2) \alpha^2)) + t12^3 \\
& \quad (8 + 2 (5 + dd1) \alpha + (-2 + dd1) \alpha^2 + 6 t22^4 \alpha^2 + 6 t22^3 \alpha (-1 + 4 \alpha) + t22^2 \\
& \quad (-22 - (29 + 4 dd1) \alpha + (1 - 2 dd1) \alpha^2) - t22 \alpha (-4 + 15 \alpha + dd1 (2 + \alpha))) + \\
& \quad t12 t22 (4 + 8 \alpha + 8 dd1 \alpha - 6 dd2 \alpha + 4 dd1 \alpha^2 - 3 dd2 \alpha^2 + 2 t22^4 \alpha^2 - \\
& \quad t22^2 (6 + 2 (7 + 5 dd1) \alpha + 5 (-1 + dd1) \alpha^2) - t22^3 (-2 + (3 + 4 dd1) \alpha + \\
& \quad 2 (2 + dd1) \alpha^2) + t22 (dd1 \alpha (2 + \alpha) + 3 dd2 \alpha (2 + \alpha) - 3 (2 + \alpha^2)))) / \\
& \left( (1 + s) (m^2 s (2 + s) (t12 - t22) + (-1 + s (-1 + t12)) (1 + s t22) - \right. \\
& \quad 2 m (-1 + s (-1 + t12)) (1 + s t22)) \\
& \quad (-2 m^3 (t12 - t22)^4 + m^4 (t12 - t22)^4 + (-1 + t12) t12 (-1 + t22) t22 + \\
& \quad m^2 (t12 - t22)^2 (-1 + t12 + t12^2 + t22 - 4 t12 t22 + t22^2) + \\
& \quad m (t12 - t22)^2 (1 - t22 + t12 (-1 + 2 t22))) \alpha (2 + \alpha) \Big), \\
p22 \rightarrow & \left( (-1 + t22) t22 (2 s^3 t22^2 (1 + \alpha) - \alpha (1 + t22 \alpha) + \right. \\
& \quad s (2 + (1 + 2 dd2 - t22) \alpha + (dd2 - 2 t22^2) \alpha^2) + \\
& \quad s^2 (-2 t22^2 \alpha^2 + dd2 \alpha (2 + \alpha) + t22 (4 + 3 \alpha + \alpha^2))) + \\
m^3 & (t12 - t22)^2 ((t12 - t22) \alpha^2 + 2 s^3 (t12 - t22) (-1 + t22) (1 + \alpha) + \\
& \quad s \alpha (dd1 (2 + \alpha) - dd2 (2 + \alpha) - (t12 - t22) (1 + 2 (-1 + t22) \alpha)) + \\
& \quad s^2 (2 t22^2 \alpha^2 + (dd1 - dd2) \alpha (2 + \alpha) + \\
& \quad t22 (2 + 3 \alpha - \alpha^2) + t12 (-2 - 3 \alpha + (1 - 2 t22) \alpha^2))) + \\
m^2 & (t12 - t22) (6 s^3 (t12 - t22) (-1 + t22) t22 (1 + \alpha) + \\
& \quad (t12 - t22) \alpha (-1 + (-1 + t22) \alpha) + \\
& \quad s^2 (t22^2 (3 - 5 \alpha) \alpha + 6 t22^3 \alpha^2 - (dd1 - dd2) \alpha (2 + \alpha) + \\
& \quad t22 (4 + (3 + 4 dd1 - 6 dd2) \alpha + (1 + 2 dd1 - 3 dd2) \alpha^2) + \\
& \quad t12 (-4 + (-3 + 2 dd2 - 3 t22) \alpha + (-1 + dd2 + 5 t22 - 6 t22^2) \alpha^2)) + \\
& \quad s (3 t22^2 (1 - 2 \alpha) \alpha + 6 t22^3 \alpha^2 - (dd1 - dd2) \alpha (2 + \alpha) + \\
& \quad t22 (4 + (4 + 4 dd1 - 6 dd2) \alpha + (2 + 2 dd1 - 3 dd2) \alpha^2) + \\
& \quad t12 (-4 + (-4 + 2 dd2 - 3 t22) \alpha + (-2 + dd2 + 6 t22 - 6 t22^2) \alpha^2))) + \\
& (m (1 + s t12) (-(-1 + m) (-1 + m (t12 - t22) + t22) (m (t12 - t22) + t22) \\
& \quad (1 + s t22) (2 ((-1 + m) t12 - m t22) + 4 s ((-1 + m) t12 - m t22) \\
& \quad (1 + (-1 + m) t12 - m t22) + 2 t12 ((-1 + m) t12 - m t22) \alpha - 2 m t12 \\
& \quad ((-1 + m) t12 - m t22) \alpha + ((-1 + m) t12 - m t22) (1 + (-1 + m) t12 - m t22) \\
& \quad \alpha + 2 s ((-1 + m) t12 - m t22) (1 + (-1 + m) t12 - m t22) \alpha + 2 \\
& \quad dd1 (-1 + m) s ((-1 + m) t12 - m t22) (1 + (-1 + m) t12 - m t22) \\
& \quad \alpha - 2 dd2 m s ((-1 + m) t12 - m t22) (1 + (-1 + m) t12 - m t22) \\
& \quad \alpha + s t12 ((-1 + m) t12 - m t22) (1 + (-1 + m) t12 - m t22) \alpha - m s \\
& \quad t12 ((-1 + m) t12 - m t22) (1 + (-1 + m) t12 - m t22) \alpha - 2 m t22 \\
& \quad (t12 - m t12 + m t22) \alpha + m s t22 (-1 + t12 - m t12 + m t22) (t12 - m t12 + m t22) \\
& \quad \alpha + dd1 (-1 + m) s ((-1 + m) t12 - m t22) (1 + (-1 + m) t12 - m t22) \\
& \quad \alpha^2 - dd2 m s ((-1 + m) t12 - m t22) (1 + (-1 + m) t12 - m t22) \\
& \quad \alpha^2 + t12 ((-1 + m) t12 - m t22) (1 + (-1 + m) t12 - m t22) \alpha^2 - m \\
& \quad t12 ((-1 + m) t12 - m t22) (1 + (-1 + m) t12 - m t22) \alpha^2 + s \\
& \quad t12 ((-1 + m) t12 - m t22) (1 + (-1 + m) t12 - m t22) \alpha^2 - m \\
& \quad s t12 ((-1 + m) t12 - m t22) (1 + (-1 + m) t12 - m t22) \alpha^2 + m
\end{aligned}$$

$$\begin{aligned}
& t_{22} (-1 + t_{12} - m t_{12} + m t_{22}) (t_{12} - m t_{12} + m t_{22}) \alpha^2 + m s t_{22} \\
& (-1 + t_{12} - m t_{12} + m t_{22}) (t_{12} - m t_{12} + m t_{22}) \alpha^2 + s^2 ((-1 + m) t_{12} - m t_{22}) \\
& (1 + (-1 + m) t_{12} - m t_{22}) (2 + \alpha) + (-1 + m) s^2 t_{12} ((-1 + m) t_{12} - m t_{22}) \\
& (1 + (-1 + m) t_{12} - m t_{22}) (2 + \alpha) - m s^2 t_{22} (-1 + t_{12} - m t_{12} + m t_{22}) \\
& (t_{12} - m t_{12} + m t_{22}) (2 + \alpha) - dd1 s^2 ((-1 + m) t_{12} - m t_{22}) \\
& (1 + (-1 + m) t_{12} - m t_{22}) \alpha (2 + \alpha) + dd1 m s^2 ((-1 + m) t_{12} - m t_{22}) \\
& (1 + (-1 + m) t_{12} - m t_{22}) \alpha (2 + \alpha) - dd2 m s^2 ((-1 + m) t_{12} - m t_{22}) \\
& (1 + (-1 + m) t_{12} - m t_{22}) \alpha (2 + \alpha) + 2 t_{12} (1 + s (1 + (-1 + m) t_{12} - m t_{22})) \\
& (1 + (1 + (-1 + m) t_{12} - m t_{22}) \alpha + s (1 + (-1 + m) t_{12} - m t_{22}) (1 + \alpha)) \\
& (1 + s (1 + (-1 + m) t_{12} - m t_{22}) + m t_{22} \alpha + t_{12} (\alpha - m \alpha)) + \\
& m (-1 + s (-1 + t_{22})) ((-1 + m) t_{12} - m t_{22}) (-1 + t_{12} - m t_{12} + m t_{22}) \\
& (2 (1 + s) (m (t_{12} - t_{22}) + t_{22}) + 4 m s (1 + s) t_{12} (m (t_{12} - t_{22}) + t_{22}) + 4 s \\
& (1 + s) t_{22} (m (t_{12} - t_{22}) + t_{22}) - 4 m s (1 + s) t_{22} (m (t_{12} - t_{22}) + t_{22}) + \\
& (1 + s) (m (t_{12} - t_{22}) + t_{22}) \alpha + 3 m s (1 + s) t_{12} (m (t_{12} - t_{22}) + t_{22}) \\
& \alpha - 2 dd2 m s (1 + s) t_{12} (m (t_{12} - t_{22}) + t_{22}) \alpha + m^2 s (1 + s) t_{12} (t_{12} - t_{22}) \\
& (m (t_{12} - t_{22}) + t_{22}) \alpha + (1 + s) t_{22} (m (t_{12} - t_{22}) + t_{22}) \alpha + 3 s (1 + s) \\
& t_{22} (m (t_{12} - t_{22}) + t_{22}) \alpha - 2 dd2 s (1 + s) t_{22} (m (t_{12} - t_{22}) + t_{22}) \\
& \alpha - 3 m s (1 + s) t_{22} (m (t_{12} - t_{22}) + t_{22}) \alpha - 2 dd1 m s (1 + s) t_{22} \\
& (m (t_{12} - t_{22}) + t_{22}) \alpha + 4 dd2 m s (1 + s) t_{22} (m (t_{12} - t_{22}) + t_{22}) \alpha + 2 \\
& m s (1 + s) t_{12} t_{22} (m (t_{12} - t_{22}) + t_{22}) \alpha - m^2 s (1 + s) (t_{12} - t_{22}) t_{22} \\
& (m (t_{12} - t_{22}) + t_{22}) \alpha + s (1 + s) t_{22}^2 (m (t_{12} - t_{22}) + t_{22}) \alpha - 2 m s \\
& (1 + s) t_{22}^2 (m (t_{12} - t_{22}) + t_{22}) \alpha + m s (1 + s) t_{12} (m (t_{12} - t_{22}) + t_{22}) \\
& \alpha^2 - dd2 m s (1 + s) t_{12} (m (t_{12} - t_{22}) + t_{22}) \alpha^2 - m^2 s (1 + s) t_{12} \\
& (t_{12} - t_{22}) (m (t_{12} - t_{22}) + t_{22}) \alpha^2 - m^2 (1 + s) (t_{12} - t_{22})^2 \\
& (m (t_{12} - t_{22}) + t_{22}) \alpha^2 + (1 + s) t_{22} (m (t_{12} - t_{22}) + t_{22}) \alpha^2 + s (1 + s) \\
& t_{22} (m (t_{12} - t_{22}) + t_{22}) \alpha^2 - dd2 s (1 + s) t_{22} (m (t_{12} - t_{22}) + t_{22}) \\
& \alpha^2 - m s (1 + s) t_{22} (m (t_{12} - t_{22}) + t_{22}) \alpha^2 - dd1 m s (1 + s) t_{22} \\
& (m (t_{12} - t_{22}) + t_{22}) \alpha^2 + 2 dd2 m s (1 + s) t_{22} (m (t_{12} - t_{22}) + t_{22}) \alpha^2 - 2 \\
& m s (1 + s) t_{12} t_{22} (m (t_{12} - t_{22}) + t_{22}) \alpha^2 + m^2 s (1 + s) (t_{12} - t_{22}) t_{22} \\
& (m (t_{12} - t_{22}) + t_{22}) \alpha^2 - (1 + s) t_{22}^2 (m (t_{12} - t_{22}) + t_{22}) \alpha^2 - s (1 + s) \\
& t_{22}^2 (m (t_{12} - t_{22}) + t_{22}) \alpha^2 + 2 m s (1 + s) t_{22}^2 (m (t_{12} - t_{22}) + t_{22}) \\
& \alpha^2 + 2 m^2 s^2 (1 + s) (t_{12} - t_{22})^2 (m (t_{12} - t_{22}) + t_{22}) (1 + \alpha) + 4 m s^2 \\
& (1 + s) (t_{12} - t_{22}) t_{22} (m (t_{12} - t_{22}) + t_{22}) (1 + \alpha) + 2 s^2 (1 + s) t_{22}^2 \\
& (m (t_{12} - t_{22}) + t_{22}) (1 + \alpha) + dd2 s (1 + s) (m (t_{12} - t_{22}) + t_{22}) \alpha \\
& (2 + \alpha) + (dd1 - dd2) m s (1 + s) (m (t_{12} - t_{22}) + t_{22}) \alpha (2 + \alpha) - dd1 \\
& m^2 s (1 + s) (t_{12} - t_{22}) (m (t_{12} - t_{22}) + t_{22}) \alpha (2 + \alpha) + dd2 m^2 \\
& s (1 + s) (t_{12} - t_{22}) (m (t_{12} - t_{22}) + t_{22}) \alpha (2 + \alpha) + m (1 + s) \\
& (t_{12} - t_{22}) (m (t_{12} - t_{22}) + t_{22}) \alpha (1 + \alpha - 2 t_{22} \alpha) - 2 t_{22} \\
& (1 + m s (t_{12} - t_{22}) + s t_{22}) (1 + s t_{22} + m (t_{12} - t_{22}) (s - \alpha) + \alpha - t_{22} \alpha) \\
& (1 + t_{22} \alpha + s t_{22} (1 + \alpha) + m (t_{12} - t_{22}) (s + \alpha + s \alpha)) \Big) \Big) / \\
& \Big( ((-1 + m)^2 t_{12}^2 + m t_{22} (-1 + m t_{22}) - (-1 + m) t_{12} (-1 + 2 m t_{22})) \\
& (m^2 s (2 + s) (t_{12} - t_{22}) + (-1 + s (-1 + t_{12})) (1 + s t_{22}) - \\
& 2 m (-1 + s (-1 + t_{12})) (1 + s t_{22})) \Big) + \\
& m (t_{22} (2 + \alpha + 2 t_{22} \alpha + t_{22}^2 \alpha^2 - 6 s^3 (-1 + t_{22}) t_{22}^2 (1 + \alpha) + \\
& s (3 t_{22}^2 (1 - 2 \alpha) \alpha + 6 t_{22}^3 \alpha^2 - (2 + \alpha) (-1 + dd1 \alpha - 2 dd2 \alpha) + \\
& t_{22} (2 + 2 (1 + dd1 - 3 dd2) \alpha + (2 + dd1 - 3 dd2) \alpha^2)) + \\
& s^2 (6 t_{22}^3 \alpha^2 - (dd1 - 2 dd2) \alpha (2 + \alpha) - t_{22}^2 (6 + 3 \alpha + 7 \alpha^2) + \\
& t_{22} (8 + 2 (3 + dd1 - 3 dd2) \alpha + (2 + dd1 - 3 dd2) \alpha^2))) + \\
& t_{12} (-2 - \alpha - 2 t_{22} \alpha - t_{22}^2 \alpha^2 + 6 s^3 (-1 + t_{22}) t_{22}^2 (1 + \alpha) -
\end{aligned}$$

$$\frac{s^2 (6 t22^3 \alpha^2 + dd2 \alpha (2 + \alpha) - t22^2 (6 + 3 \alpha + 7 \alpha^2) + t22 (8 + (6 - 4 dd2) \alpha - 2 (-1 + dd2) \alpha^2)) - s (3 t22^2 (1 - 2 \alpha) \alpha + 6 t22^3 \alpha^2 + (2 + \alpha) (1 + dd2 \alpha) + 2 t22 (1 + \alpha - 2 dd2 \alpha + \alpha^2 - dd2 \alpha^2))}{((-1 + m) (1 + s) (1 + s t22) (m^2 (t12 - t22)^2 + (-1 + t22) t22 + m (t12 - t22) (-1 + 2 t22)) \alpha (2 + \alpha))};$$

```
del1 = Factor[deltagensym[[1]] /. p12p22gentdd];
```

```
Exponent[Numerator[del1], {t12, t22, dd1, dd2}]
```

```
{9, 9, 1, 1}
```

```
del4 = Factor[deltagensym[[4]] /. p12p22gentdd];
```

```
Exponent[Numerator[del4], {t12, t22, dd1, dd2}]
```

```
{9, 9, 1, 1}
```

Therefore, we can indeed solve  $\{\text{deltagensym}[[1]], \text{deltagensym}[[4]]\} = 0$  for  $(dd1, dd2)$ :

```
Simplify[{dd1, dd2} /. Solve[{del1, del4} == 0, {dd1, dd2}]]
```

The following is  $(dd1, dd2)$  as a function of  $(t12, t22)$ ; this is independent of  $r$ :

```
dd12gent12 =
```

$$\begin{aligned} \{dd1 \rightarrow - & \left( \left( (-1 + t12) t12 (m^6 s (t12 - t22)^6 (-2 \alpha^2 + s (-3 - 2 t12 + 2 t22) \alpha^2 + 2 s^3 (1 + t12 - \right. \right. \\ & t22) (1 + \alpha) + s^2 (4 + 4 \alpha + (-1 - 2 t12 + 2 t22) \alpha^2)) - m^5 (t12 - t22)^5 \\ & (2 \alpha^2 + 2 s (2 - t12 + t22) \alpha^2 + 2 s^4 (-2 + t12 + 3 t12^2 - t22 - 6 t12 t22 + 3 t22^2) \\ & (1 + \alpha) - 3 s^2 (4 + 4 \alpha + (-1 + t12 + 2 t12^2 - t22 - 4 t12 t22 + 2 t22^2) \alpha^2) + \\ & s^3 (-12 - 12 \alpha + \alpha^2 - 6 t12^2 \alpha^2 - 6 t22^2 \alpha^2 + t22 (-4 - 4 \alpha + \alpha^2) + \\ & t12 (4 + 4 \alpha + (-1 + 12 t22) \alpha^2)) \right) + \\ & m^4 (t12 - t22)^4 (3 (t12 - t22) \alpha^2 + 2 s^4 (1 + 3 t12^3 + 5 t22 - 12 t12^2 t22 - \\ & 3 t22^2 - 3 t22^3 + 2 t12 (-2 + t22 + 6 t22^2)) (1 + \alpha) + \\ & s (12 + 12 \alpha + (2 + 4 t12^2 + t12 (3 - 2 t22) - 9 t22 + 4 t22^2) \alpha^2) - \\ & 3 s^2 (-6 - 6 \alpha - \alpha^2 + 2 t12^3 \alpha^2 - 3 t22^2 \alpha^2 - 2 t22^3 \alpha^2 - t12^2 (1 + 8 t22) \alpha^2 + \\ & t22 (-6 - 6 \alpha + 4 \alpha^2) + t12 (6 + 6 \alpha + (-1 + t22 + 8 t22^2) \alpha^2)) + \\ & s^3 (10 + 10 \alpha + \alpha^2 - 6 t12^3 \alpha^2 + 6 t22^3 \alpha^2 + t22 (20 + 20 \alpha - 6 \alpha^2) + \\ & t22^2 (-6 - 6 \alpha + 5 \alpha^2) + t12^2 (-6 - 6 \alpha + (-1 + 24 t22) \alpha^2) - \\ & t12 (16 + 16 \alpha - 3 \alpha^2 + 24 t22^2 \alpha^2 + t22 (-8 - 8 \alpha + \alpha^2)) \right) - \\ & (-1 + t12) t12 (-1 + t22) t22 ((t12 - t22) \alpha^2 + 2 s^4 (-1 + t12) (-1 + t12 - t22) \\ & t22 (1 + \alpha) + s (4 + 4 \alpha - (-3 t12 + 2 t12^2 + t22 - 2 t12 t22 + 2 t22^2) \alpha^2) + \\ & s^2 (-4 t22^2 \alpha^2 - 2 t12^2 (1 + t22) \alpha^2 + 6 (1 + \alpha) + t22 (6 + 6 \alpha + \alpha^2) + \\ & t12 (-6 - 6 \alpha + (2 + 3 t22 + 2 t22^2) \alpha^2)) + \\ & s^3 (2 (1 + \alpha) + t22^2 (2 + 2 \alpha - 2 \alpha^2) + t22 (8 + 8 \alpha + \alpha^2) + t12^2 \\ & (2 + 2 \alpha - 2 t22 \alpha^2) + t12 (2 t22^2 \alpha^2 - 4 (1 + \alpha) + t22 (-8 - 8 \alpha + \alpha^2))) \right) - \\ & m^3 (t12 - t22)^3 (2 s^4 (t12^4 + t12^3 (1 - 10 t22) + t12^2 (-5 + 5 t22 + 18 t22^2) + \\ & t12 (3 + 8 t22 - 11 t22^2 - 10 t22^3) + t22 (-3 - 3 t22 + 5 t22^2 + t22^3)) \\ & (1 + \alpha) - 2 (2 + 2 \alpha + (1 - t22 + t12 (-1 + 2 t22)) \alpha^2) + \\ & 2 s (3 t12^3 \alpha^2 + t22^2 \alpha^2 - 3 t22^3 \alpha^2 - t12^2 (1 + 7 t22) \alpha^2 + 2 t22 (-4 - 4 \alpha + \alpha^2) - \\ & 2 (2 + 2 \alpha + \alpha^2) + t12 (8 + 8 \alpha + (2 - 4 t22 + 7 t22^2) \alpha^2)) - \\ & s^2 (2 t12^4 \alpha^2 + 15 t22^3 \alpha^2 + 2 t22^4 \alpha^2 - t12^3 (3 + 20 t22) \alpha^2 + \\ & t22^2 (6 + 6 \alpha - 9 \alpha^2) - 3 t22 (-8 - 8 \alpha + \alpha^2) + \\ & 3 (2 + 2 \alpha + \alpha^2) + 3 t12^2 (2 + 2 \alpha + (-1 + 5 t22 + 12 t22^2) \alpha^2) - \end{aligned}$$

$$\begin{aligned}
& t_{12} (27 t_{22}^2 \alpha^2 + 20 t_{22}^3 \alpha^2 + 3 (8 + 8 \alpha + \alpha^2) - 6 t_{22} (-2 - 2 \alpha + 3 \alpha^2)) - \\
& s^3 (2 + 2 \alpha + \alpha^2 + 2 t_{12}^4 \alpha^2 + 2 t_{22}^4 \alpha^2 + t_{22}^2 (2 + 2 \alpha - 7 \alpha^2) + t_{22} (20 + 20 \alpha - \\
& \alpha^2) + t_{22}^3 (-8 - 8 \alpha + 9 \alpha^2) + t_{12}^3 (8 + 8 \alpha + (3 - 20 t_{22}) \alpha^2) + t_{12}^2 \\
& (36 t_{22}^2 \alpha^2 + t_{22} (-32 - 32 \alpha + \alpha^2) - 5 (-2 - 2 \alpha + \alpha^2)) - t_{12} (20 + 20 \alpha + \\
& \alpha^2 + 20 t_{22}^3 \alpha^2 - 2 t_{22} (-6 - 6 \alpha + 7 \alpha^2) + t_{22}^2 (-32 - 32 \alpha + 13 \alpha^2))) - \\
& m (t_{12} - t_{22}) (2 s t_{12}^4 (-1 - 2 (-1 + s) t_{22} + 3 s t_{22}^2) (-\alpha^2 - s \alpha^2 + s^2 (1 + \alpha)) + \\
& (1 + s) (-1 + t_{22}) t_{22} (-2 - 2 \alpha - t_{22} \alpha^2 + 2 s^3 t_{22}^2 (1 + \alpha) + \\
& s^2 t_{22} (2 + 2 \alpha + (1 - 2 t_{22}) \alpha^2) - 2 s t_{22} (1 + \alpha + t_{22} \alpha^2)) + \\
& t_{12}^3 ((-1 + 2 t_{22}) \alpha^2 - 6 s^4 t_{22} (-2 + t_{22} + 2 t_{22}^2) (1 + \alpha) + \\
& s (2 + 2 \alpha + (-5 + 2 t_{22} + 10 t_{22}^2) \alpha^2) + \\
& s^3 (-3 + 4 t_{22}) (3 t_{22}^2 \alpha^2 - 2 (1 + \alpha) + 2 t_{22} (-3 - 3 \alpha + \alpha^2)) + \\
& s^2 (6 + 6 \alpha - 4 \alpha^2 + 9 t_{22}^2 \alpha^2 + 12 t_{22}^3 \alpha^2 - 6 t_{22} (1 + \alpha + \alpha^2))) + \\
& t_{12} (2 + 2 \alpha + t_{22}^2 (-1 + 2 t_{22}) \alpha^2 - 2 s^4 t_{22} (-2 - 3 t_{22} + 2 t_{22}^2 + 4 t_{22}^3) \\
& (1 + \alpha) + s (6 t_{22}^3 \alpha^2 + 4 t_{22}^4 \alpha^2 + 6 (1 + \alpha) - t_{22}^2 (2 + 2 \alpha + 7 \alpha^2)) + \\
& s^3 (2 (1 + \alpha) + t_{22}^2 (2 + 2 \alpha - 5 \alpha^2) + 2 t_{22} (9 + 9 \alpha + \alpha^2) - 2 t_{22}^3 \\
& (11 + 11 \alpha + 2 \alpha^2) + t_{22}^4 (-4 - 4 \alpha + 8 \alpha^2)) + s^2 (12 t_{22}^4 \alpha^2 + 6 (1 + \alpha) - \\
& 6 t_{22}^3 (1 + \alpha) + 2 t_{22} (9 + 9 \alpha + \alpha^2) - t_{22}^2 (18 + 18 \alpha + 11 \alpha^2))) + \\
& t_{12}^2 (-2 - 2 \alpha - (-1 + t_{22} + 2 t_{22}^2) \alpha^2 + 6 s^4 t_{22} (-2 - t_{22} + 3 t_{22}^2 + t_{22}^3) \\
& (1 + \alpha) + s (-8 - 8 \alpha + 3 \alpha^2 - 4 t_{22}^2 \alpha^2 - 10 t_{22}^3 \alpha^2 + t_{22} (2 + 2 \alpha + 3 \alpha^2)) + \\
& s^2 (-21 t_{22}^3 \alpha^2 - 6 t_{22}^4 \alpha^2 + 2 (-6 - 6 \alpha + \alpha^2) + 4 t_{22} (-3 - 3 \alpha + \alpha^2) + \\
& t_{22}^2 (24 + 24 \alpha + 11 \alpha^2)) + s^3 (-6 t_{22}^4 \alpha^2 - 6 (1 + \alpha) - 32 t_{22} (1 + \alpha) + \\
& t_{22}^3 (24 + 24 \alpha - 11 \alpha^2) + t_{22}^2 (24 + 24 \alpha + 13 \alpha^2))) - \\
& m^2 (t_{12} - t_{22})^2 (2 s t_{12}^4 (1 + s (-1 + 3 t_{22})) (-\alpha^2 - s \alpha^2 + s^2 (1 + \alpha)) + \\
& t_{22} (-4 - 4 \alpha + (-1 + t_{22} - t_{22}^2) \alpha^2 + 2 s^4 t_{22} (-3 + t_{22} + 2 t_{22}^2) (1 + \alpha) - \\
& s^2 (6 + 6 \alpha + 4 \alpha^2 + 4 t_{22}^2 \alpha^2 + 6 t_{22}^3 \alpha^2 + t_{22} (6 + 6 \alpha - 11 \alpha^2)) - \\
& s (4 + 4 \alpha + 3 \alpha^2 + 5 t_{22}^2 \alpha^2 + 2 t_{22}^3 \alpha^2 + t_{22} (8 + 8 \alpha - 7 \alpha^2)) + s^3 (8 t_{22}^2 (1 + \\
& \alpha) + t_{22}^3 (2 + 2 \alpha - 4 \alpha^2) + 5 t_{22} (-2 - 2 \alpha + \alpha^2) - 2 (2 + 2 \alpha + \alpha^2))) + \\
& t_{12}^2 (- (1 + t_{22}) \alpha^2 + 6 s^4 (-1 - 3 t_{22} + 4 t_{22}^2 + 4 t_{22}^3) (1 + \alpha) - \\
& s (8 + 8 \alpha + (-3 + 5 t_{22} + 18 t_{22}^2) \alpha^2) + \\
& s^3 (14 t_{22} \alpha^2 - 24 t_{22}^3 \alpha^2 - 22 (1 + \alpha) + t_{22}^2 (48 + 48 \alpha - 9 \alpha^2)) + \\
& s^2 (-27 t_{22}^2 \alpha^2 - 24 t_{22}^3 \alpha^2 + 2 (-9 - 9 \alpha + 2 \alpha^2) + 2 t_{22} (6 + 6 \alpha + 5 \alpha^2))) + \\
& t_{12}^3 (\alpha^2 + s (-1 + 14 t_{22}) \alpha^2 + s^2 (-5 + 9 t_{22} + 24 t_{22}^2) \alpha^2 - 6 s^4 (-1 + 4 t_{22}^2) \\
& (1 + \alpha) + s^3 (8 + 8 \alpha - 3 \alpha^2 + 24 t_{22}^2 \alpha^2 - t_{22} (24 + 24 \alpha + 5 \alpha^2))) + \\
& t_{12} (4 + 4 \alpha + (1 + t_{22}^2) \alpha^2 - 2 s^4 (-1 - 6 t_{22} - 3 t_{22}^2 + 12 t_{22}^3 + 3 t_{22}^4) \\
& (1 + \alpha) + s (12 + 12 \alpha + \alpha^2 - t_{22}^2 \alpha^2 + 14 t_{22}^3 \alpha^2 + t_{22} (8 + 8 \alpha - 2 \alpha^2)) + s^3 \\
& (12 + 12 \alpha + \alpha^2 + 6 t_{22}^4 \alpha^2 + t_{22} (28 + 28 \alpha - \alpha^2) - t_{22}^2 (24 + 24 \alpha + 17 \alpha^2) + \\
& t_{22}^3 (-24 - 24 \alpha + 19 \alpha^2)) + s^2 (18 + 18 \alpha + \alpha^2 + 33 t_{22}^3 \alpha^2 + \\
& 6 t_{22}^4 \alpha^2 - 3 t_{22} (-4 - 4 \alpha + \alpha^2) - t_{22}^2 (12 + 12 \alpha + 19 \alpha^2)))) / \\
& ((1 + s) (-1 + m (t_{12} - t_{22}) + t_{22}) (m (t_{12} - t_{22}) + t_{22}) ((-1 + m) t_{12} - m t_{22}) \\
& (1 + (-1 + m) t_{12} - m t_{22}) \\
& ((-1 + m) m s (2 + s) t_{12}^2 + \\
& t_{12} (-1 - 2 s t_{22} - s^2 t_{22} - 2 m^2 s (2 + s) t_{22} + m (2 + 2 s + s^2 + 4 s t_{22} + 2 s^2 t_{22})) + \\
& t_{22} ((1 + s)^2 + m^2 s (2 + s) t_{22} - m (2 + 2 s (1 + t_{22}) + s^2 (1 + t_{22})))) \alpha (2 + \alpha)), \\
& dd2 \rightarrow ((-1 + t_{22}) t_{22} (-m^6 s (t_{12} - t_{22})^6 (-2 \alpha^2 + s (-3 - 2 t_{12} + 2 t_{22}) \alpha^2 + \\
& 2 s^3 (1 + t_{12} - t_{22}) (1 + \alpha) + s^2 (4 + 4 \alpha + (-1 - 2 t_{12} + 2 t_{22}) \alpha^2)) + \\
& m^5 (t_{12} - t_{22})^5 (2 \alpha^2 + 2 s (2 - t_{12} + t_{22}) \alpha^2 + \\
& 2 s^4 (-2 + t_{12} + 3 t_{12}^2 - t_{22} - 6 t_{12} t_{22} + 3 t_{22}^2) (1 + \alpha) - \\
& 3 s^2 (4 + 4 \alpha + (-1 + t_{12} + 2 t_{12}^2 - t_{22} - 4 t_{12} t_{22} + 2 t_{22}^2) \alpha^2) + \\
& s^3 (-12 - 12 \alpha + \alpha^2 - 6 t_{12}^2 \alpha^2 - 6 t_{22}^2 \alpha^2 + t_{22}
\end{aligned}$$



$$\begin{aligned}
& (-4 - 4\alpha + \alpha^2) + t12 (4 + 4\alpha + (-1 + 12 t22) \alpha^2) \Big) - \\
m^4 & (t12 - t22)^4 (3 (t12 - t22) \alpha^2 + 2 s^4 (1 + 3 t12^3 + 5 t22 - 12 t12^2 \\
& t22 - 3 t22^2 - 3 t22^3 + 2 t12 (-2 + t22 + 6 t22^2)) (1 + \alpha) + \\
& s (12 + 12\alpha + (2 + 4 t12^2 + t12 (3 - 2 t22) - 9 t22 + 4 t22^2) \alpha^2) - \\
& 3 s^2 (-6 - 6\alpha - \alpha^2 + 2 t12^3 \alpha^2 - 3 t22^2 \alpha^2 - 2 t22^3 \alpha^2 - t12^2 (1 + 8 t22) \\
& \alpha^2 + t22 (-6 - 6\alpha + 4 \alpha^2) + t12 (6 + 6\alpha + (-1 + t22 + 8 t22^2) \alpha^2) \Big) + \\
& s^3 (10 + 10\alpha + \alpha^2 - 6 t12^3 \alpha^2 + 6 t22^3 \alpha^2 + t22 (20 + 20\alpha - 6 \alpha^2) + t22^2 \\
& (-6 - 6\alpha + 5 \alpha^2) + t12^2 (-6 - 6\alpha + (-1 + 24 t22) \alpha^2) - t12 \\
& (16 + 16\alpha - 3 \alpha^2 + 24 t22^2 \alpha^2 + t22 (-8 - 8\alpha + \alpha^2) \Big) \Big) + (-1 + t12) t12 \\
& (-1 + t22) t22 ((t12 - t22) \alpha^2 + 2 s^4 (-1 + t12) (-1 + t12 - t22) t22 (1 + \alpha) + \\
& s (4 + 4\alpha - (-3 t12 + 2 t12^2 + t22 - 2 t12 t22 + 2 t22^2) \alpha^2) + \\
& s^2 (-4 t22^2 \alpha^2 - 2 t12^2 (1 + t22) \alpha^2 + 6 (1 + \alpha) + t22 \\
& (6 + 6\alpha + \alpha^2) + t12 (-6 - 6\alpha + (2 + 3 t22 + 2 t22^2) \alpha^2) \Big) + \\
& s^3 (2 (1 + \alpha) + t22^2 (2 + 2\alpha - 2 \alpha^2) + t22 (8 + 8\alpha + \alpha^2) + t12^2 \\
& (2 + 2\alpha - 2 t22 \alpha^2) + t12 (2 t22^2 \alpha^2 - 4 (1 + \alpha) + t22 (-8 - 8\alpha + \alpha^2) \Big) \Big) + \\
m^3 & (t12 - t22)^3 (2 s^4 (t12^4 + t12^3 (1 - 10 t22) + t12^2 (-5 + 5 t22 + 18 t22^2) + \\
& t12 (3 + 8 t22 - 11 t22^2 - 10 t22^3) + t22 (-3 - 3 t22 + 5 t22^2 + t22^3) \Big) + \\
& (1 + \alpha) - 2 (2 + 2\alpha + (1 - t22 + t12 (-1 + 2 t22)) \alpha^2) + \\
& 2 s (3 t12^3 \alpha^2 + t22^2 \alpha^2 - 3 t22^3 \alpha^2 - t12^2 (1 + 7 t22) \alpha^2 + 2 t22 \\
& (-4 - 4\alpha + \alpha^2) - 2 (2 + 2\alpha + \alpha^2) + t12 (8 + 8\alpha + (2 - 4 t22 + 7 t22^2) \alpha^2) \Big) - \\
& s^2 (2 t12^4 \alpha^2 + 15 t22^3 \alpha^2 + 2 t22^4 \alpha^2 - t12^3 (3 + 20 t22) \alpha^2 + t22^2 \\
& (6 + 6\alpha - 9 \alpha^2) - 3 t22 (-8 - 8\alpha + \alpha^2) + 3 (2 + 2\alpha + \alpha^2) + 3 \\
& t12^2 (2 + 2\alpha + (-1 + 5 t22 + 12 t22^2) \alpha^2) - t12 \\
& (27 t22^2 \alpha^2 + 20 t22^3 \alpha^2 + 3 (8 + 8\alpha + \alpha^2) - 6 t22 (-2 - 2\alpha + 3 \alpha^2) \Big) - \\
& s^3 (2 + 2\alpha + \alpha^2 + 2 t12^4 \alpha^2 + 2 t22^4 \alpha^2 + t22^2 (2 + 2\alpha - 7 \alpha^2) + t22 \\
& (20 + 20\alpha - \alpha^2) + t22^3 (-8 - 8\alpha + 9 \alpha^2) + t12^3 (8 + 8\alpha + (3 - 20 t22) \alpha^2) + \\
& t12^2 (36 t22^2 \alpha^2 + t22 (-32 - 32\alpha + \alpha^2) - 5 (-2 - 2\alpha + \alpha^2) \Big) - t12 (20 + 20\alpha + \\
& \alpha^2 + 20 t22^3 \alpha^2 - 2 t22 (-6 - 6\alpha + 7 \alpha^2) + t22^2 (-32 - 32\alpha + 13 \alpha^2) \Big) \Big) + \\
m & (t12 - t22) (2 s t12^4 (-1 - 2 (-1 + s) t22 + 3 s t22^2) (-\alpha^2 - s \alpha^2 + s^2 (1 + \alpha)) + \\
& (1 + s) (-1 + t22) t22 (-2 - 2\alpha - t22 \alpha^2 + 2 s^3 t22^2 (1 + \alpha) + s^2 \\
& t22 (2 + 2\alpha + (1 - 2 t22) \alpha^2) - 2 s t22 (1 + \alpha + t22 \alpha^2) \Big) + \\
& t12^3 ((-1 + 2 t22) \alpha^2 - 6 s^4 t22 (-2 + t22 + 2 t22^2) (1 + \alpha) + s \\
& (2 + 2\alpha + (-5 + 2 t22 + 10 t22^2) \alpha^2) + s^3 (-3 + 4 t22) \\
& (3 t22^2 \alpha^2 - 2 (1 + \alpha) + 2 t22 (-3 - 3\alpha + \alpha^2) \Big) + s^2 \\
& (6 + 6\alpha - 4 \alpha^2 + 9 t22^2 \alpha^2 + 12 t22^3 \alpha^2 - 6 t22 (1 + \alpha + \alpha^2) \Big) + \\
& t12 (2 + 2\alpha + t22^2 (-1 + 2 t22) \alpha^2 - 2 s^4 t22 (-2 - 3 t22 + 2 t22^2 + 4 t22^3) \\
& (1 + \alpha) + s (6 t22^3 \alpha^2 + 4 t22^4 \alpha^2 + 6 (1 + \alpha) - t22^2 (2 + 2\alpha + 7 \alpha^2) \Big) + s^3 \\
& (2 (1 + \alpha) + t22^2 (2 + 2\alpha - 5 \alpha^2) + 2 t22 (9 + 9\alpha + \alpha^2) - 2 t22^3 \\
& (11 + 11\alpha + 2 \alpha^2) + t22^4 (-4 - 4\alpha + 8 \alpha^2) \Big) + s^2 (12 t22^4 \alpha^2 + 6 (1 + \alpha) - \\
& 6 t22^3 (1 + \alpha) + 2 t22 (9 + 9\alpha + \alpha^2) - t22^2 (18 + 18\alpha + 11 \alpha^2) \Big) + \\
& t12^2 (-2 - 2\alpha - (-1 + t22 + 2 t22^2) \alpha^2 + 6 s^4 t22 (-2 - t22 + 3 t22^2 + t22^3) \\
& (1 + \alpha) + s (-8 - 8\alpha + 3 \alpha^2 - 4 t22^2 \alpha^2 - 10 t22^3 \alpha^2 + t22 (2 + 2\alpha + 3 \alpha^2) \Big) + s^2 \\
& (-21 t22^3 \alpha^2 - 6 t22^4 \alpha^2 + 2 (-6 - 6\alpha + \alpha^2) + 4 t22 (-3 - 3\alpha + \alpha^2) + \\
& t22^2 (24 + 24\alpha + 11 \alpha^2) \Big) + s^3 (-6 t22^4 \alpha^2 - 6 (1 + \alpha) - 32 t22 (1 + \alpha) + \\
& t22^3 (24 + 24\alpha - 11 \alpha^2) + t22^2 (24 + 24\alpha + 13 \alpha^2) \Big) \Big) + \\
m^2 & (t12 - t22)^2 (2 s t12^4 (1 + s (-1 + 3 t22)) (-\alpha^2 - s \alpha^2 + s^2 (1 + \alpha)) + \\
& t22 (-4 - 4\alpha + (-1 + t22 - t22^2) \alpha^2 + 2 s^4 t22 (-3 + t22 + 2 t22^2) (1 + \alpha) - s^2 \\
& (6 + 6\alpha + 4 \alpha^2 + 4 t22^2 \alpha^2 + 6 t22^3 \alpha^2 + t22 (6 + 6\alpha - 11 \alpha^2) \Big) - s \\
& (4 + 4\alpha + 3 \alpha^2 + 5 t22^2 \alpha^2 + 2 t22^3 \alpha^2 + t22 (8 + 8\alpha - 7 \alpha^2) \Big) + s^3 (8 t22^2 \\
& (1 + \alpha) + t22^3 (2 + 2\alpha - 4 \alpha^2) + 5 t22 (-2 - 2\alpha + \alpha^2) - 2 (2 + 2\alpha + \alpha^2) \Big) +
\end{aligned}$$

$$\begin{aligned}
& t_{12}^2 \left( - (1 + t_{22}) \alpha^2 + 6 s^4 (-1 - 3 t_{22} + 4 t_{22}^2 + 4 t_{22}^3) (1 + \alpha) - s \right. \\
& \quad \left( 8 + 8 \alpha + (-3 + 5 t_{22} + 18 t_{22}^2) \alpha^2 \right) + s^3 \\
& \quad \left( 14 t_{22} \alpha^2 - 24 t_{22}^3 \alpha^2 - 22 (1 + \alpha) + t_{22}^2 (48 + 48 \alpha - 9 \alpha^2) \right) + s^2 \\
& \quad \left( -27 t_{22}^2 \alpha^2 - 24 t_{22}^3 \alpha^2 + 2 (-9 - 9 \alpha + 2 \alpha^2) + 2 t_{22} (6 + 6 \alpha + 5 \alpha^2) \right) \Big) + \\
& t_{12}^3 \left( \alpha^2 + s (-1 + 14 t_{22}) \alpha^2 + s^2 (-5 + 9 t_{22} + 24 t_{22}^2) \alpha^2 - 6 s^4 (-1 + 4 t_{22}^2) \right. \\
& \quad \left. (1 + \alpha) + s^3 (8 + 8 \alpha - 3 \alpha^2 + 24 t_{22}^2 \alpha^2 - t_{22} (24 + 24 \alpha + 5 \alpha^2)) \right) + \\
& t_{12} \left( 4 + 4 \alpha + (1 + t_{22}^2) \alpha^2 - 2 s^4 (-1 - 6 t_{22} - 3 t_{22}^2 + 12 t_{22}^3 + 3 t_{22}^4) \right. \\
& \quad \left. (1 + \alpha) + s (12 + 12 \alpha + \alpha^2 - t_{22}^2 \alpha^2 + 14 t_{22}^3 \alpha^2 + t_{22} (8 + 8 \alpha - 2 \alpha^2)) + s^3 \right. \\
& \quad \left. (12 + 12 \alpha + \alpha^2 + 6 t_{22}^4 \alpha^2 + t_{22} (28 + 28 \alpha - \alpha^2) - t_{22}^2 (24 + 24 \alpha + 17 \alpha^2) + \right. \\
& \quad \left. t_{22}^3 (-24 - 24 \alpha + 19 \alpha^2)) + s^2 (18 + 18 \alpha + \alpha^2 + 33 t_{22}^3 \alpha^2 + \right. \\
& \quad \left. 6 t_{22}^4 \alpha^2 - 3 t_{22} (-4 - 4 \alpha + \alpha^2) - t_{22}^2 (12 + 12 \alpha + 19 \alpha^2)) \right) \Big) \Big) / \\
& \left( (1 + s) (-1 + m (t_{12} - t_{22}) + t_{22}) (m (t_{12} - t_{22}) + t_{22}) \right. \\
& \quad \left( (-1 + m) t_{12} - m t_{22} \right) \\
& \quad \left( 1 + (-1 + m) t_{12} - m t_{22} \right) \\
& \quad \left( (-1 + m) m s (2 + s) t_{12}^2 + \right. \\
& \quad \left. t_{12} (-1 - 2 s t_{22} - s^2 t_{22} - 2 m^2 s (2 + s) t_{22} + m (2 + 2 s + s^2 + 4 s t_{22} + 2 s^2 t_{22})) \right) + \\
& \quad \left. t_{22} \left( (1 + s)^2 + m^2 s (2 + s) t_{22} - m (2 + 2 s (1 + t_{22}) + s^2 (1 + t_{22})) \right) \right) \alpha (2 + \\
& \quad \alpha) \Big) \Big);
\end{aligned}$$

Exponent[Numerator[dd2] /. dd12gent12, {p12, t12, dd1, p22, t22, d22}]

{0, 7, 0, 0, 9, 0}

Now we can substitute dd12gent12 into p12p22gentdd to obtain (p12, p22) as functions of (t12, t22):

Simplify[p12p22gentdd /. dd12gent12]

p12p22gent12 =

$$\begin{aligned}
\{p_{12} \rightarrow - \Big( & (-m^6 s (t_{12} - t_{22})^6 (2 s^3 t_{12} (t_{12} - t_{22}) (1 + \alpha) + 2 \alpha (1 + t_{22} \alpha) + s \alpha \\
& (3 - 2 t_{12}^2 \alpha + 2 t_{22} \alpha + t_{12} (\alpha + 2 t_{22} \alpha)) + s^2 (\alpha - 2 t_{12}^2 \alpha^2 - 2 t_{22} \\
& (1 + \alpha) + t_{12} (2 + 2 \alpha + (1 + 2 t_{22}) \alpha^2)) + (-1 + t_{12}) t_{12} (-1 + t_{22}) t_{22} \\
& (2 s^4 (-1 + t_{12}) t_{22} (1 + t_{12}^2 - t_{12} (2 + t_{22})) (1 + \alpha) + (t_{12} - t_{22}) \alpha (1 + t_{12} \alpha) - \\
& s (1 + t_{12} \alpha) (2 t_{12}^2 \alpha + t_{22} (2 + 5 \alpha) - t_{12} (2 + (3 + 4 t_{22}) \alpha)) - s^2 (-1 + t_{12}) \\
& (2 t_{12}^2 (1 + t_{22}) \alpha^2 - 3 t_{22} (2 + 3 \alpha) + t_{12} (6 + 6 \alpha - t_{22} (5 + 2 t_{22}) \alpha^2)) - \\
& s^3 (-1 + t_{12}) (-t_{22} (6 + 7 \alpha) + 2 t_{12}^2 (-1 - \alpha + t_{22} \alpha^2) + t_{12} \\
& (-2 t_{22}^2 \alpha^2 + 2 (1 + \alpha) + t_{22} (10 + 10 \alpha - \alpha^2))) + m^5 (t_{12} - t_{22})^5 \\
& (2 s^4 t_{12} (3 t_{12}^2 - 2 t_{12} (1 + 3 t_{22}) + t_{22} (2 + 3 t_{22})) (1 + \alpha) - 2 \alpha (1 + t_{22} \alpha) - \\
& 2 s \alpha (2 - 2 t_{12}^2 \alpha + 3 t_{22}^2 \alpha + t_{22} (3 + \alpha) + t_{12} (-3 + \alpha - t_{22} \alpha)) - \\
& 3 s^2 (t_{22} (-2 + \alpha) + \alpha + 2 t_{12}^3 \alpha^2 + 2 t_{22}^2 \alpha^2 - t_{12}^2 \\
& (3 + 4 t_{22}) \alpha^2 + t_{12} (2 - \alpha + (1 + t_{22} + 2 t_{22}^2) \alpha^2)) - \\
& s^3 (6 t_{12}^3 \alpha^2 + t_{12}^2 (2 + 2 \alpha - (5 + 12 t_{22}) \alpha^2) - (1 + 3 t_{22}) \\
& (-\alpha + 2 t_{22} (1 + \alpha)) + t_{12} (2 - \alpha + \alpha^2 + 6 t_{22}^2 \alpha^2 + t_{22} (4 + 4 \alpha + 5 \alpha^2))) \Big) - \\
& m^4 (t_{12} - t_{22})^4 (2 s^4 t_{12} (1 + 3 t_{12}^3 - 2 t_{22} - 6 t_{22}^2 - 3 t_{22}^3 - 3 t_{12}^2 \\
& (1 + 4 t_{22}) + t_{12} (-1 + 11 t_{22} + 12 t_{22}^2)) (1 + \alpha) - \\
& (t_{12} - t_{22}) \alpha (5 + t_{12} \alpha + 4 t_{22} \alpha) + s (10 t_{12}^3 \alpha^2 + 6 t_{22}^3 \alpha^2 + 6 t_{22}^2 \\
& \alpha (1 + \alpha) + 2 (2 + \alpha) + t_{12}^2 \alpha (6 - 7 (1 + 2 t_{22}) \alpha) + t_{22} \\
& (-10 + 3 \alpha - 2 \alpha^2) + t_{12} (2 - (5 + 18 t_{22}) \alpha + (7 - 8 t_{22}) t_{22} \alpha^2)) - \\
& s^2 (6 t_{12}^4 \alpha^2 - 6 t_{22}^3 \alpha^2 - 3 t_{12}^3 (5 + 8 t_{22}) \alpha^2 - 3 (2 + \alpha) + t_{22}^2 \\
& (12 + 3 \alpha - 2 \alpha^2) + 2 t_{22} (6 + \alpha^2) + t_{12}^2 (6 - 3 \alpha + (5 + 33 t_{22} + 24 t_{22}^2) \alpha^2) + \\
& t_{12} (-3 t_{22}^2 \alpha^2 - 6 t_{22}^3 \alpha^2 + \alpha (3 + \alpha) - 3 t_{22} (6 - 3 \alpha + 4 \alpha^2))) \Big) +
\end{aligned}$$

$$\begin{aligned}
& s^3 \left( 2 + 2 t22 (-1 + \alpha) + \alpha - 6 t12^4 \alpha^2 - 6 t22^3 (1 + \alpha) - 3 t22^2 \right. \\
& \quad \left( 2 + \alpha \right) + t12^3 (-12 - 12 \alpha + (5 + 24 t22) \alpha^2) + t12^2 \\
& \quad \left( 2 + 5 \alpha + \alpha^2 - 24 t22^2 \alpha^2 + t22 (20 + 20 \alpha - 19 \alpha^2) \right) + t12 \\
& \quad \left. \left( 2 + \alpha - \alpha^2 + 6 t22^3 \alpha^2 + t22 (-8 - 17 \alpha + 2 \alpha^2) + t22^2 (6 + 6 \alpha + 11 \alpha^2) \right) \right) + \\
& m \left( t12 - t22 \right) \left( 2 t12 t22 - 2 t22^2 - 2 t12 t22^2 + 2 t22^3 + t12^2 \alpha - t12^3 \alpha - \right. \\
& \quad 2 t12 t22 \alpha + 3 t12^2 t22 \alpha + 2 t12^3 t22 \alpha - t22^2 \alpha + t12 t22^2 \alpha - 6 t12^2 t22^2 \alpha + \\
& \quad t22^3 \alpha + 2 t12 t22^3 \alpha + t12^3 \alpha^2 - t12^4 \alpha^2 - 2 t12^2 t22 \alpha^2 + t12^3 t22 \alpha^2 + \\
& \quad 2 t12^4 t22 \alpha^2 - t12 t22^2 \alpha^2 + 3 t12^2 t22^2 \alpha^2 - 4 t12^3 t22^2 \alpha^2 + t12 t22^3 \alpha^2 + \\
& \quad 2 s^4 (-1 + t12) t12 t22 (2 - 2 t22^2 - t22^3 + t12^3 (-2 + 3 t22) - 3 t12^2 \\
& \quad (-2 + t22 + 2 t22^2) + 3 t12 (-2 + 2 t22^2 + t22^3)) (1 + \alpha) - s^3 (-1 + t12) \\
& \quad \left( (-1 + t22) t22^2 (2 + \alpha) + 2 t12^4 (1 + \alpha + 3 t22^2 \alpha^2 - 2 t22 (1 + \alpha + \alpha^2)) + t12 \right. \\
& \quad \left. t22 (t22 (2 + \alpha)^2 - 2 (6 + 7 \alpha) - 2 t22^3 (1 + \alpha + \alpha^2) + t22^2 (16 + 19 \alpha + \alpha^2)) \right) + \\
& \quad t12^3 (-12 t22^3 \alpha^2 - 4 (1 + \alpha) + 6 t22 (-3 - 3 \alpha + \alpha^2) + t22^2 (30 + 30 \alpha + \alpha^2)) + \\
& \quad t12^2 (6 t22^4 \alpha^2 + 2 (1 + \alpha) + t22 (34 + 36 \alpha - 2 \alpha^2) - \\
& \quad 3 t22^2 (8 + 9 \alpha + 2 \alpha^2) + t22^3 (-24 - 24 \alpha + 5 \alpha^2)) - s^2 (-1 + t12) \\
& \quad \left( 2 t12^4 (-1 + 3 t22^2) \alpha^2 + 3 (-1 + t22) t22^2 (2 + \alpha) + t12^2 (15 t22^3 \alpha^2 + \right. \\
& \quad 6 t22^4 \alpha^2 + 6 (1 + \alpha) + t22 (18 + 24 \alpha - 10 \alpha^2) - t22^2 (30 + 39 \alpha + 4 \alpha^2)) + \\
& \quad t12 t22 (t22^2 (9 - 5 \alpha) \alpha - 6 (2 + 3 \alpha) + t22 (18 + 18 \alpha + 5 \alpha^2)) + t12^3 \\
& \quad \left. (-15 t22^2 \alpha^2 - 12 t22^3 \alpha^2 + 2 (-3 - 3 \alpha + \alpha^2) + 2 t22 (3 + 3 \alpha + 7 \alpha^2)) \right) + \\
& s \left( 2 t12^5 (1 - 2 t22) \alpha^2 + 3 (-1 + t22) t22^2 (2 + \alpha) + t12^4 \right. \\
& \quad \left( 2 + 2 \alpha + (-5 - 2 t22 + 16 t22^2) \alpha^2 \right) + t12^2 (4 + 5 \alpha - 2 t22^4 \alpha^2 + \\
& \quad 2 t22^3 \alpha (-3 + 8 \alpha) + t22 (-4 + 7 \alpha - 10 \alpha^2) + t22^2 (-2 - 14 \alpha + \alpha^2)) + t12 \\
& \quad t22 (2 - 6 \alpha + 2 t22^3 \alpha^2 + t22^2 (-4 + 6 \alpha - 5 \alpha^2) + t22 (4 + 5 \alpha + 3 \alpha^2)) + t12^3 \\
& \quad \left. (-6 - 7 \alpha + 2 t22^2 (3 - 11 \alpha) \alpha + 3 \alpha^2 - 10 t22^3 \alpha^2 + t22 (4 + 2 \alpha + 17 \alpha^2)) \right) + \\
& m^3 \left( t12 - t22 \right)^3 \left( 2 s^4 t12 (-2 + t12^4 - 10 t12^3 t22 + 5 t22^2 + 6 t22^3 + t22^4 + \right. \\
& \quad t12^2 (-5 + 14 t22 + 18 t22^2) - 2 t12 (-3 + 2 t22 + 10 t22^2 + 5 t22^3)) (1 + \alpha) - \\
& \quad 2 (2 + \alpha + t12^3 \alpha^2 + t22^3 \alpha^2 + t22^2 \alpha (2 + \alpha) + t12^2 \alpha (2 - t22 \alpha) - t22 \\
& \quad (3 + 2 \alpha + \alpha^2) + t12 (-1 + t22 (-6 + \alpha) \alpha - 3 t22^2 \alpha^2)) + 2 s (4 t12^4 \\
& \quad \alpha^2 - t22^4 \alpha^2 - 2 (2 + \alpha) - t22^3 \alpha (1 + 3 \alpha) + t12^3 \alpha (1 - (2 + 15 t22) \alpha) + t22^2 \\
& \quad (7 + \alpha^2) + t22 (3 + 3 \alpha + \alpha^2) + t12^2 (1 - 3 \alpha^2 + 7 t22^2 \alpha^2 + t22 \alpha (-9 + 13 \alpha)) + \\
& \quad t12 (5 + \alpha + t22^2 (9 - 4 \alpha) \alpha + \alpha^2 + 5 t22^3 \alpha^2 - 2 t22 (4 - 2 \alpha + \alpha^2)) \right) - \\
& s^3 \left( 2 + t22^2 (-4 + \alpha) + \alpha + 2 t12^5 \alpha^2 - 2 t22^4 (1 + \alpha) + t22 (2 + \alpha) - t22^3 (6 + 5 \alpha) + \right. \\
& \quad t12^4 (10 + 10 \alpha + (1 - 20 t22) \alpha^2) + t12^2 (-22 - 23 \alpha + 5 \alpha^2 - 20 t22^3 \alpha^2 + t22^2 \\
& \quad (32 + 32 \alpha - 31 \alpha^2) + t22 (46 + 55 \alpha + 2 \alpha^2)) + t12 (6 + 9 \alpha - \alpha^2 + 2 t22^4 \alpha^2 + \\
& \quad t22^2 (-20 - 29 \alpha + 3 \alpha^2) - t22 (10 + 16 \alpha + 3 \alpha^2) + t22^3 (8 + 8 \alpha + 11 \alpha^2)) + \\
& \quad t12^3 (4 + 3 \alpha - 7 \alpha^2 + 36 t22^2 \alpha^2 + t22 (-48 - 48 \alpha + 19 \alpha^2)) \right) + \\
& s^2 \left( -2 t12^5 \alpha^2 - 2 t22^4 \alpha^2 + t12^4 (7 + 20 t22) \alpha^2 - 3 (2 + \alpha) - 3 t22 \right. \\
& \quad \left( 2 + \alpha \right) + t12^3 \alpha (3 + (5 - 49 t22 - 36 t22^2) \alpha) + t22^3 \\
& \quad (6 + 3 \alpha - 4 \alpha^2) + t22^2 (24 + 9 \alpha + 4 \alpha^2) + t12 (-t22^3 \alpha^2 - 2 t22^4 \alpha^2 + \\
& \quad t22^2 (-24 + 3 \alpha - 17 \alpha^2) + 3 (2 - \alpha + \alpha^2) + t22 (6 + 24 \alpha + \alpha^2)) + t12^2 \\
& \quad \left. (6 + 9 \alpha - 11 \alpha^2 + 45 t22^2 \alpha^2 + 20 t22^3 \alpha^2 + t22 (-6 - 33 \alpha + 22 \alpha^2)) \right) + \\
& m^2 \left( t12 - t22 \right)^2 \left( 2 s t12^5 (1 + s (-1 + 3 t22)) (-\alpha^2 - s \alpha^2 + s^2 (1 + \alpha)) + \right. \\
& \quad t12^4 (\alpha^2 + s (-3 + 20 t22) \alpha^2 + 3 s^2 (-3 + 7 t22 + 8 t22^2) \\
& \quad \alpha^2 - 2 s^4 (-4 + 3 t22 + 12 t22^2) (1 + \alpha) + s^3 \\
& \quad (24 t22^2 \alpha^2 + t22 (-30 - 30 \alpha + \alpha^2) - 5 (-2 - 2 \alpha + \alpha^2))) + \\
& \quad t22 (-4 - \alpha - t22^2 \alpha (1 + 2 \alpha) + t22 (6 + 3 \alpha + 2 \alpha^2) + s^3 \\
& \quad (2 t22^2 + 2 t22^3 (1 + \alpha) - 2 (2 + \alpha) + t22 (2 + \alpha)) + s^2 \\
& \quad (-2 t22^3 \alpha^2 - 6 (2 + \alpha) + 3 t22 (2 + \alpha) + 2 t22^2 (6 + 3 \alpha + \alpha^2)) + s \\
& \quad \left. (-t22^2 (-4 + \alpha) - 2 t22^3 \alpha^2 - 7 (2 + \alpha) + t22 (16 + 11 \alpha + 2 \alpha^2)) \right) +
\end{aligned}$$

$$\begin{aligned}
& t_{12} \left( 4 + \alpha - t_{22}^2 (-9 + \alpha) \alpha + 3 t_{22}^3 \alpha^2 + 2 s^4 (-1 - 3 t_{22} + 3 t_{22}^2 + 4 t_{22}^3 + 2 t_{22}^4) \right. \\
& \quad \left( 1 + \alpha \right) - t_{22} (2 + \alpha)^2 - s^3 (6 + 7 \alpha + t_{22} (6 + 11 \alpha - 2 \alpha^2) + \\
& \quad 4 t_{22}^4 (1 + \alpha + \alpha^2) - t_{22}^2 (26 + 35 \alpha + 3 \alpha^2) + t_{22}^3 (-8 - 11 \alpha + 4 \alpha^2)) + s \\
& \quad (2 - 3 \alpha - t_{22}^3 (-6 + \alpha) \alpha + 4 t_{22}^4 \alpha^2 + t_{22}^2 (-20 + 7 \alpha - 9 \alpha^2) + \\
& \quad t_{22} (16 + 6 \alpha + 5 \alpha^2)) - s^2 (6 + 9 \alpha + t_{22}^2 \alpha (-27 + 5 \alpha) + \\
& \quad t_{22}^3 (12 + 3 \alpha + 8 \alpha^2) - t_{22} (24 + 9 \alpha + 8 \alpha^2)) \Big) + \\
& t_{12}^3 (6 s^4 (-2 - 2 t_{22} + 7 t_{22}^2 + 4 t_{22}^3) (1 + \alpha) + \alpha (1 + \alpha - 5 t_{22} \alpha) - s \\
& \quad (4 + (5 - 6 t_{22}) \alpha + (-11 + 17 t_{22} + 30 t_{22}^2) \alpha^2) + s^2 (-18 - 21 \alpha + 14 \alpha^2 - \\
& \quad 57 t_{22}^2 \alpha^2 - 24 t_{22}^3 \alpha^2 + t_{22} (24 + 33 \alpha + 2 \alpha^2)) + s^3 (-32 - 33 \alpha + \\
& \quad 4 \alpha^2 - 24 t_{22}^3 \alpha^2 + t_{22}^2 (60 + 60 \alpha - 27 \alpha^2) + t_{22} (24 + 27 \alpha + 14 \alpha^2)) \Big) - \\
& t_{12}^2 (2 + (-1 + 9 t_{22}) \alpha - (-1 + 2 t_{22} + t_{22}^2) \alpha^2 + 2 s^4 \\
& \quad (-4 - 9 t_{22} + 12 t_{22}^2 + 15 t_{22}^3 + 3 t_{22}^4) (1 + \alpha) + s \\
& \quad (-4 - 11 \alpha + t_{22}^2 (18 - 35 \alpha) \alpha + 5 \alpha^2 - 2 t_{22}^3 \alpha^2 + t_{22} (4 + 13 \alpha + 10 \alpha^2)) + s^3 \\
& \quad (-26 - 28 \alpha + \alpha^2 - 6 t_{22}^4 \alpha^2 + t_{22}^3 (12 + 12 \alpha - 25 \alpha^2) + t_{22}^2 (84 + 93 \alpha - \alpha^2) + \\
& \quad t_{22} (-16 - 16 \alpha + 11 \alpha^2)) + s^2 (-24 - 30 \alpha + 5 \alpha^2 - 27 t_{22}^3 \alpha^2 - \\
& \quad 6 t_{22}^4 \alpha^2 + t_{22}^2 (12 + 39 \alpha - 35 \alpha^2) + t_{22} (30 + 30 \alpha + 23 \alpha^2)) \Big) \Big) / \\
& \left( (1 + s) (-1 + m (t_{12} - t_{22}) + t_{22}) (m (t_{12} - t_{22}) + t_{22}) ((-1 + m) t_{12} - m t_{22}) \right. \\
& \quad (1 + (-1 + m) t_{12} - m t_{22}) \\
& \quad \left. ((-1 + m) m s (2 + s) t_{12}^2 + \right. \\
& \quad t_{12} (-1 - 2 s t_{22} - s^2 t_{22} - 2 m^2 s (2 + s) t_{22} + m (2 + 2 s + s^2 + 4 s t_{22} + 2 s^2 t_{22})) \Big) + \\
& \quad t_{22} ((1 + s)^2 + m^2 s (2 + s) t_{22} - m (2 + 2 s (1 + t_{22}) + s^2 (1 + t_{22}))) \Big) \alpha (2 + \alpha) \Big) \Big), \\
p_{22} \rightarrow & - \left( (-m^6 s (t_{12} - t_{22})^6 (2 s^3 (t_{12} - t_{22}) (-1 + t_{22}) (1 + \alpha) + 2 \alpha (1 + t_{12} \alpha) + \right. \\
& s \alpha (3 - 2 t_{12} (-2 + t_{22}) \alpha - t_{22} \alpha + 2 t_{22}^2 \alpha) + \\
& s^2 (\alpha + 2 t_{22}^2 \alpha^2 + t_{22} (2 + 2 \alpha - \alpha^2) - 2 t_{12} (1 + \alpha + (-1 + t_{22}) \alpha^2))) + \\
& m^5 (t_{12} - t_{22})^5 (2 s^4 (-1 + t_{22}) (3 t_{12}^2 - 2 t_{12} (1 + 3 t_{22}) + t_{22} (2 + 3 t_{22})) \\
& (1 + \alpha) - 2 \alpha (1 + t_{12} \alpha) + \\
& 2 s \alpha (-2 + t_{22} (-3 + \alpha) + 3 t_{12}^2 \alpha - 2 t_{22}^2 \alpha - t_{12} (-3 + (3 + t_{22}) \alpha)) - \\
& 3 s^2 (\alpha + 2 t_{12}^2 (-2 + t_{22}) \alpha^2 + t_{22}^2 \alpha^2 + 2 t_{22}^3 \alpha^2 + t_{22} (2 + 5 \alpha - \alpha^2) + t_{12} \\
& (-2 - 5 \alpha + (2 + 3 t_{22} - 4 t_{22}^2) \alpha^2)) + s^3 (-\alpha - 6 t_{22}^3 \alpha^2 + t_{22} \\
& (-10 - 13 \alpha + \alpha^2) + t_{22}^2 (2 + 2 \alpha + \alpha^2) - 6 t_{12}^2 (1 + \alpha + (-1 + t_{22}) \alpha^2) + \\
& t_{12} (10 + 13 \alpha - 2 \alpha^2 + 12 t_{22}^2 \alpha^2 + t_{22} (4 + 4 \alpha - 7 \alpha^2))) \Big) + \\
& (-1 + t_{12}) t_{12} (-1 + t_{22}) t_{22} (-2 s^4 t_{22} (1 - t_{12}^2 (-1 + t_{22}) - t_{22} - \\
& t_{22}^2 + t_{12} (-2 + 2 t_{22} + t_{22}^2)) (1 + \alpha) + (t_{12} - t_{22}) \alpha (1 + t_{22} \alpha) - \\
& s (1 + t_{22} \alpha) (t_{12} (2 + \alpha - 4 t_{22} \alpha) + t_{22} (-2 + \alpha + 2 t_{22} \alpha)) + \\
& s^2 t_{22} (-3 \alpha - 2 t_{12}^2 (-1 + t_{22}) \alpha^2 - 4 t_{22}^2 \alpha^2 + t_{22} \\
& (6 + 6 \alpha + \alpha^2) + t_{12} (-6 - 3 \alpha + (-4 + 5 t_{22} + 2 t_{22}^2) \alpha^2)) + \\
& s^3 t_{22} (-4 - 5 \alpha - 2 t_{12}^2 (-1 + t_{22}) \alpha^2 + t_{22}^2 (2 + 2 \alpha - 2 \alpha^2) + t_{22} \\
& (8 + 8 \alpha + \alpha^2) + t_{12} (4 + 5 \alpha - 2 \alpha^2 + 2 t_{22}^2 \alpha^2 + t_{22} (-10 - 10 \alpha + \alpha^2))) \Big) - \\
& m^4 (t_{12} - t_{22})^4 (-2 s^4 (-1 + t_{22}) (-3 t_{12}^3 + 3 t_{12}^2 (1 + 4 t_{22}) - t_{12} \\
& t_{22} (11 + 12 t_{22}) + t_{22} (1 + 6 t_{22} + 3 t_{22}^2)) (1 + \alpha) - \\
& (t_{12} - t_{22}) \alpha (5 + 4 t_{12} \alpha + t_{22} \alpha) + s (-3 t_{22}^2 (-2 + \alpha) \alpha + 6 t_{12}^3 \alpha^2 + \\
& 10 t_{22}^3 \alpha^2 + 2 (2 + \alpha) + t_{22} (2 + 15 \alpha) - 2 t_{12}^2 \alpha (-3 + (5 + 4 t_{22}) \alpha) - \\
& t_{12} (10 + (17 + 18 t_{22}) \alpha + (2 - 19 t_{22} + 14 t_{22}^2) \alpha^2)) + \\
& s^3 (2 + \alpha + 6 t_{22}^4 \alpha^2 + t_{22}^2 (14 + 17 \alpha - 6 \alpha^2) + t_{22} (8 + 12 \alpha + \alpha^2) + t_{22}^3 \\
& (-12 - 12 \alpha + 5 \alpha^2) - 6 t_{12}^3 (1 + \alpha + (-1 + t_{22}) \alpha^2) + t_{12}^2 \\
& (18 + 21 \alpha - 2 \alpha^2 + 24 t_{22}^2 \alpha^2 + t_{22} (6 + 6 \alpha - 19 \alpha^2)) - t_{12} \\
& (8 + 9 \alpha + 2 \alpha^2 + 24 t_{22}^3 \alpha^2 - 5 t_{22}^2 (2 + \alpha)^2 + t_{22} (44 + 53 \alpha - 11 \alpha^2))) \Big) +
\end{aligned}$$

$$\begin{aligned}
& s^2 \left( -6 t_{12}^3 (-2 + t_{22}) \alpha^2 + 15 t_{22}^3 \alpha^2 + 6 t_{22}^4 \alpha^2 + 3 (2 + \alpha) + t_{22}^2 (6 + 15 \alpha - 10 \alpha^2) + t_{22} (6 + 18 \alpha + \alpha^2) + t_{12}^2 (12 + 21 \alpha + (-8 - 27 t_{22} + 24 t_{22}^2) \alpha^2) - \right. \\
& \quad \left. t_{12} (18 + 21 \alpha + 4 \alpha^2 + 9 t_{22}^2 \alpha^2 + 24 t_{22}^3 \alpha^2 - 9 t_{22} (-2 - 5 \alpha + 3 \alpha^2)) \right) + \\
& m^3 \left( (t_{12} - t_{22})^3 (2 s^4 (-1 + t_{22}) (t_{12}^4 - 10 t_{12}^3 t_{22} + t_{22}^2 (3 + 6 t_{22} + t_{22}^2) + \right. \\
& \quad \left. t_{12}^2 (-3 + 14 t_{22} + 18 t_{22}^2) - 2 t_{12} (-1 + 2 t_{22} + 10 t_{22}^2 + 5 t_{22}^3)) (1 + \alpha) - \right. \\
& \quad \left. 2 (2 - t_{22} + \alpha + 2 t_{22}^2 \alpha + t_{12}^3 \alpha^2 + t_{22}^3 \alpha^2 + t_{12}^2 \alpha (2 + \alpha - 3 t_{22} \alpha) - \right. \\
& \quad \left. t_{12} (3 + (2 + 6 t_{22}) \alpha + (1 - t_{22} + t_{22}^2) \alpha^2)) + \right. \\
& \quad \left. 2 s (t_{12}^4 \alpha^2 - 4 t_{22}^4 \alpha^2 - 2 (2 + \alpha) - t_{22}^3 \alpha (1 + 2 \alpha) - t_{12}^3 \alpha \right. \\
& \quad \left. (-1 + \alpha + 5 t_{22} \alpha) - t_{22} (1 + \alpha + \alpha^2) + t_{22}^2 (-1 - 8 \alpha + 3 \alpha^2) - t_{12}^2 \right. \\
& \quad \left. (7 + (8 + 9 t_{22}) \alpha + (5 - 16 t_{22} + 7 t_{22}^2) \alpha^2) + t_{12} \right. \\
& \quad \left. (9 + 5 \alpha - 9 t_{22}^2 (-1 + \alpha) \alpha + 3 \alpha^2 + 15 t_{22}^3 \alpha^2 + t_{22} (8 + 20 \alpha - 2 \alpha^2)) \right) + \\
& s^2 \left( -2 t_{12}^4 (-2 + t_{22}) \alpha^2 - 17 t_{22}^4 \alpha^2 - 2 t_{22}^5 \alpha^2 - 3 (2 + \alpha) + t_{22}^3 \right. \\
& \quad \left. \alpha (-3 + 5 \alpha) + t_{22}^2 \alpha (-15 + 7 \alpha) - 3 t_{22} (4 + 3 \alpha + \alpha^2) + t_{12}^3 \right. \\
& \quad \left. (6 + 9 \alpha + (2 - 31 t_{22} + 20 t_{22}^2) \alpha^2) - t_{12}^2 (18 + 15 \alpha + 14 \alpha^2 - 3 t_{22}^2 \alpha^2 + \right. \\
& \quad \left. 36 t_{22}^3 \alpha^2 + t_{22} (24 + 51 \alpha - 43 \alpha^2)) + t_{12} (41 t_{22}^3 \alpha^2 + 20 t_{22}^4 \alpha^2 + \right. \\
& \quad \left. t_{22}^2 (-6 + 21 \alpha - 44 \alpha^2) + t_{22} (54 + 72 \alpha + \alpha^2) + 3 (4 + \alpha + 2 \alpha^2)) \right) + \\
& s^3 \left( -2 - \alpha - 2 t_{22}^5 \alpha^2 + t_{22}^4 (10 + 10 \alpha - 9 \alpha^2) + t_{22}^2 (-16 - 21 \alpha + \alpha^2) - \right. \\
& \quad \left. t_{22} (4 + 3 \alpha + \alpha^2) + t_{22}^3 (4 + 3 \alpha + 7 \alpha^2) - 2 t_{12}^4 (1 + \alpha + (-1 + t_{22}) \alpha^2) + \right. \\
& \quad \left. t_{12}^3 (6 + 7 \alpha + 2 \alpha^2 + 20 t_{22}^2 \alpha^2 + t_{22} (8 + 8 \alpha - 21 \alpha^2)) + t_{12} \right. \\
& \quad \left. (-4 - 7 \alpha + 2 \alpha^2 + 20 t_{22}^4 \alpha^2 + t_{22}^2 (34 + 43 \alpha - 24 \alpha^2) + t_{22} (50 + 56 \alpha + 3 \alpha^2) + \right. \\
& \quad \left. t_{22}^3 (-48 - 48 \alpha + 11 \alpha^2)) + t_{12}^2 (2 + 3 \alpha - 6 \alpha^2 - 36 t_{22}^3 \alpha^2 + \right. \\
& \quad \left. t_{22} (-68 - 77 \alpha + 17 \alpha^2) + t_{22}^2 (32 + 32 \alpha + 17 \alpha^2)) \right) + m^2 (t_{12} - t_{22})^2 \\
& (2 s t_{12}^4 (1 + s - 2 t_{22} - 4 s t_{22} + 3 s t_{22}^2) (-\alpha^2 - s \alpha^2 + s^2 (1 + \alpha)) + \\
& \quad t_{12}^2 (-6 - 3 (1 + 3 t_{22}) \alpha + (-2 + t_{22} - t_{22}^2) \alpha^2 + 6 s^4 \\
& \quad (1 - 8 t_{22}^2 + 3 t_{22}^3 + 4 t_{22}^4) (1 + \alpha) - s^2 (33 t_{22}^3 \alpha^2 + 24 t_{22}^4 \alpha^2 + \\
& \quad t_{22}^2 (-12 + 15 \alpha - 64 \alpha^2) + 6 (-1 - 2 \alpha + \alpha^2) + 4 t_{22} (15 + 15 \alpha + 4 \alpha^2)) - s^3 \\
& \quad (24 t_{22}^4 \alpha^2 + t_{22}^2 (60 + 69 \alpha - 32 \alpha^2) + 3 t_{22}^3 (-20 - 20 \alpha + \alpha^2) + \\
& \quad 2 (-7 - 8 \alpha + \alpha^2) + 2 t_{22} (17 + 17 \alpha + 5 \alpha^2)) - s \\
& \quad (8 + \alpha + t_{22}^2 (18 - 31 \alpha) \alpha + 6 \alpha^2 + 30 t_{22}^3 \alpha^2 + t_{22} (20 + 29 \alpha + 5 \alpha^2)) + \\
& \quad t_{22} (-4 - \alpha - t_{22}^3 \alpha^2 + 2 s^4 t_{22}^2 (-3 + t_{22} + 2 t_{22}^2) (1 + \alpha) - t_{22}^2 \alpha (1 + \alpha) + \\
& \quad t_{22} (2 - \alpha + \alpha^2) - s (7 t_{22}^3 \alpha^2 + 2 t_{22}^4 \alpha^2 + 7 (2 + \alpha) + t_{22}^2 (4 + 9 \alpha - 7 \alpha^2) + \\
& \quad t_{22} (-12 - 7 \alpha + \alpha^2)) - s^3 (-10 t_{22}^3 (1 + \alpha) + 2 (2 + \alpha) + \\
& \quad t_{22}^2 (8 + 10 \alpha - 5 \alpha^2) + t_{22} (2 + 3 \alpha + 2 \alpha^2) + t_{22}^4 (-2 - 2 \alpha + 4 \alpha^2)) - s^2 \\
& \quad (6 t_{22}^3 \alpha^2 + 6 t_{22}^4 \alpha^2 + 6 (2 + \alpha) + t_{22} \alpha (3 + 4 \alpha) - t_{22}^2 (6 + 13 \alpha^2)) + \\
& \quad t_{12}^3 (-6 s^4 (1 - 2 t_{22} - 3 t_{22}^2 + 4 t_{22}^3) (1 + \alpha) + \alpha (1 + (2 - 3 t_{22}) \alpha) + \\
& \quad s (4 + (3 + 6 t_{22}) \alpha + (8 - 13 t_{22} + 2 t_{22}^2) \alpha^2) + s^2 (-21 t_{22}^2 \alpha^2 + \\
& \quad 24 t_{22}^3 \alpha^2 + \alpha (-3 + 10 \alpha) + t_{22} (12 + 21 \alpha - 13 \alpha^2)) + s^3 (-10 - 11 \alpha + \\
& \quad 4 \alpha^2 + 24 t_{22}^3 \alpha^2 + t_{22} (32 + 35 \alpha - 3 \alpha^2) - t_{22}^2 (12 + 12 \alpha + 23 \alpha^2)) + \\
& \quad t_{12} (4 + \alpha + t_{22}^2 (9 - 2 \alpha) \alpha + 5 t_{22}^3 \alpha^2 - 2 s^4 (1 + 2 t_{22} - 12 t_{22}^2 - \\
& \quad 6 t_{22}^3 + 12 t_{22}^4 + 3 t_{22}^5) (1 + \alpha) + t_{22} (2 + \alpha)^2 + s (2 - 3 \alpha + 20 t_{22}^4 \alpha^2 + \\
& \quad 3 t_{22}^3 \alpha (2 + \alpha) + t_{22}^2 (-4 + 23 \alpha - 18 \alpha^2) + t_{22} (32 + 22 \alpha + 9 \alpha^2)) + s^3 \\
& \quad (-6 - 7 \alpha + 6 t_{22}^5 \alpha^2 + t_{22}^2 (64 + 73 \alpha - 3 \alpha^2) + 5 t_{22} (2 + \alpha + \alpha^2) - \\
& \quad 3 t_{22}^3 (8 + 7 \alpha + 7 \alpha^2) + t_{22}^4 (-30 - 30 \alpha + 19 \alpha^2)) + s^2 \\
& \quad (-6 - 9 \alpha + 39 t_{22}^4 \alpha^2 + 6 t_{22}^5 \alpha^2 + t_{22}^2 (18 + 45 \alpha - 19 \alpha^2) + \\
& \quad t_{22} (48 + 33 \alpha + 13 \alpha^2) - t_{22}^3 (24 + 15 \alpha + 23 \alpha^2)) + m (t_{12} - t_{22}) \\
& (2 s t_{12}^4 (-1 + t_{22}) t_{22} (-1 + s (-2 + 3 t_{22})) (-\alpha^2 - s \alpha^2 + s^2 (1 + \alpha)) + \\
& \quad (1 + s) (-1 + t_{22}) t_{22}^2 (2 s^3 t_{22}^2 (1 + \alpha) - \alpha (1 + t_{22} \alpha) - 2 s \\
& \quad (-2 + t_{22} - \alpha + t_{22} \alpha + t_{22}^2 \alpha^2) + s^2 (2 + \alpha - 2 t_{22}^2 \alpha^2 + t_{22} (2 + 2 \alpha + \alpha^2))) +
\end{aligned}$$



**Numerator [factdelta3r0]**

```
- 4 dd1 m + 4 dd2 m - 4 dd1 s - 20 dd1 m s + 20 dd2 m s - 20 dd1 s2 - 40 dd1 m s2 + 40 dd2 m s2 -
40 dd1 s3 - 40 dd1 m s3 + 40 dd2 m s3 - 40 dd1 s4 - 20 dd1 m s4 + 20 dd2 m s4 - 20 dd1 s5 -
4 dd1 m s5 + ... 37 286 ... + 2 m6 p222 s4 t225 α4 - m5 p12 p222 s4 t225 α4 + m6 p12 p222 s4 t225 α4 +
m5 p223 s4 t225 α4 - m6 p223 s4 t225 α4 - 24 dd1 m5 s2 t12 t225 α4 + 24 dd1 m6 s2 t12 t225 α4 -
48 dd1 m5 s3 t12 t225 α4 + 48 dd1 m6 s3 t12 t225 α4 - 24 dd1 m5 s4 t12 t225 α4 +
24 dd1 m6 s4 t12 t225 α4 - 4 dd1 m6 s2 t226 α4 - 8 dd1 m6 s3 t226 α4 - 4 dd1 m6 s4 t226 α4
```

large output

show less

show more

show all

set size limit...

Therefore, the constant term in `deltagensym[[3]]` is given by

**Factor [factdelta3r0 /. p12p22gent12 /. dd12gent12]**

0

This gives indeed 0, but takes > 12 CPU hours. An analogous fact holds for the constant term in `deltagensym[[6]]`.

In addition, we find :

**Factor [**

```
Numerator [Factor [Coefficient [deltagensym [ [3] ], r, 1] /. p12p22gent12 /. dd12gent12] ] -
Numerator [Factor [Coefficient [deltagensym [ [6] ], r, 1] /. p12p22gent12 /. dd12gent12] ] ]
```

0

Therefore, `Coefficient[deltagensym[[3]], r, 1] = 0` is satisfied if and only if `Coefficient[deltagensym[[6]], r, 1] = 0`. Therefore, the conditions are dependent and the equilibria for  $r > 0$  are determined by solving `Coefficient[deltagensym[[3]], r, 1] = 0`. This implies that  $t_{22}$  is obtained as function of  $t_{12}$ . Hence, there is a curve of equilibria!

Summary.

If  $r=0$ , then `p12p22gent12` and `dd12gent12` give the manifold of equilibria, i.e., for every  $(t_{12}, t_{22})$  there is a potential equilibrium (not necessarily admissible).

For given  $(t_{12}, t_{22})$ , `p12p22gent12` gives the values of  $p_{12}$  and  $p_{22}$ , and `dd12gent12` gives  $dd_{12}$  and  $dd_{22}$ .

Because the constant terms in `deltagensym[[3]]` and `deltagensym[[6]]` vanish, this also shows that if  $r > 0$ , then the set of equilibria does not depend on  $r$ !

If  $r > 0$ , it is sufficient to equate the coefficient of  $r$  in `deltagensym[[3]]` to zero to obtain the equilibria!

Because this coefficient is a polynomial of high degree in  $t_{12}$  and  $t_{22}$ , an explicit analytical solution is impossible.

However, there exists a curve of equilibria (in each deme), and it is independent of  $r$ !

This curve was computed numerically by taking a large number of initial conditions, iterating until equilibrium was reached, and then using curve fitting through these points to display the curve (see Section 3.1.1 for an example).

The endpoints of this curve were computed numerically as outlined in Section 2.1.2 above.

One numerical check:

```
Simplify[deltagensym[[3]] /. p12p22gent12 /. dd12gent12 /. {t12 → 0.3, t22 → 0.64} /.
{s → 0.2, α → 10, m → 0.01}]
-4.16334 × 10-17 + 0.0205532 r
```

## 2.4 One isolated population: Derivation of curve of equilibria

This is analogous to Kirkpatrick's (1982) model, who assumed that the trait is expressed only in males. It is also a special case of the continent-island model with  $m=0$  (Servedio and Bürger 2015).

### 2.4.1 Basics and import definitions

It is sufficient to focus on  $p_2 = p_{22}$ ,  $t_2 = t_{22}$ , and  $d_2 = d_{d2}$ , and set  $m_1 = m_2 = 0$  in itgen. In addition,  $s_1$  becomes irrelevant.

```
Simplify[
(itgen[s1, s, α1, α2, 0, 0, r] [{p12, t12, d1, p2, t2, d2}] - {p12, t12, d1, p2, t2, d2}) [[
4 ;; 6]]]
```

delitgenNoMig =

$$\begin{aligned} & \left\{ (d_2 (p_2 \alpha_2 + 2 s^3 t_2^2 (1 + \alpha_2) + \alpha_1 (-1 + p_2 + p_2 \alpha_2 - t_2 \alpha_2) + s (2 + d_2 \alpha_2 + p_2 \alpha_2 + 2 t_2 \alpha_2 + \right. \\ & \quad p_2 t_2 \alpha_2 + \alpha_1 (1 - 3 t_2 - 2 t_2^2 \alpha_2 + d_2 (1 + \alpha_2) + p_2 (1 + t_2) (1 + \alpha_2))) + \\ & \quad s^2 (-2 t_2^2 (\alpha_1 - \alpha_2 + \alpha_1 \alpha_2) + d_2 (\alpha_1 + \alpha_2 + \alpha_1 \alpha_2) + \\ & \quad t_2 (4 + (2 + p_2) \alpha_2 + (1 + p_2) \alpha_1 (1 + \alpha_2))) \bigg) / \\ & \quad (2 (1 + s t_2) (1 + s t_2 + \alpha_1 - t_2 \alpha_1) (1 + t_2 \alpha_2 + s t_2 (1 + \alpha_2))) \bigg\}, \\ & \frac{1}{2} t_2 (-2 + ((1 + s) (2 + p_2 \alpha_2 + 2 t_2 \alpha_2 - p_2 t_2 \alpha_2 + 2 s^2 t_2^2 (1 + \alpha_2) - (-1 + t_2) \alpha_1 \\ & \quad (1 + p_2 + p_2 \alpha_2 + t_2 \alpha_2) + s (d_2 (\alpha_1 + \alpha_2 + \alpha_1 \alpha_2) + t_2 (4 + (2 - d_2 + p_2) \alpha_2 - \\ & \quad (-1 + d_2 - p_2) \alpha_1 (1 + \alpha_2)) - t_2^2 ((-2 + p_2) \alpha_2 + (1 + p_2) \alpha_1 (1 + \alpha_2)))))) / \\ & \quad ((1 + s t_2) (1 + s t_2 + \alpha_1 - t_2 \alpha_1) (1 + t_2 \alpha_2 + s t_2 (1 + \alpha_2))) \bigg\}, \\ & (-4 d_2 (1 + s t_2)^2 (1 + s t_2 + \alpha_1 - t_2 \alpha_1)^2 (1 + t_2 \alpha_2 + s t_2 (1 + \alpha_2))^2 + \\ & \quad (1 + s) (d_2^2 (r + s - s t_2 + r s t_2) (\alpha_1 + \alpha_2 + \alpha_1 \alpha_2) + \\ & \quad p_2 t_2 (2 + p_2 \alpha_2 + r \alpha_2 - p_2 r \alpha_2 + 2 t_2 \alpha_2 - p_2 t_2 \alpha_2 - r t_2 \alpha_2 + p_2 r t_2 \alpha_2 + \\ & \quad 2 s^2 t_2^2 (1 + \alpha_2) - (-1 + t_2) \alpha_1 (1 + r + r \alpha_2 + t_2 \alpha_2 - p_2 (-1 + r) (1 + \alpha_2)) + \\ & \quad s t_2 (4 + (2 + r + p_2 (-1 + r) (-1 + t_2) + 2 t_2 - r t_2) \alpha_2 + (-1 + p_2 (-1 + r) - r) \\ & \quad (-1 + t_2) \alpha_1 (1 + \alpha_2))) + d_2 (2 + \alpha_1 + p_2 \alpha_1 - t_2 \alpha_1 - p_2 t_2 \alpha_1 + p_2 \alpha_2 + \\ & \quad 2 t_2 \alpha_2 - p_2 t_2 \alpha_2 + p_2 \alpha_1 \alpha_2 + t_2 \alpha_1 \alpha_2 - p_2 t_2 \alpha_1 \alpha_2 - t_2^2 \alpha_1 \alpha_2 + 2 s^2 t_2^2 (1 + \alpha_2) + \\ & \quad s t_2 (4 + 2 (1 + p_2 + t_2 - p_2 t_2) \alpha_2 - (1 + 2 p_2) (-1 + t_2) \alpha_1 (1 + \alpha_2)) + \\ & \quad r (-2 - p_2 \alpha_2 - 2 t_2 \alpha_2 + 2 p_2 t_2 \alpha_2 + \alpha_1 (-1 - t_2 \alpha_2 + p_2 (-1 + 2 t_2) (1 + \alpha_2)) + s \\ & \quad t_2 (-2 - \alpha_2 - t_2 (\alpha_1 + \alpha_2 + \alpha_1 \alpha_2) + p_2 (-1 + 2 t_2) (\alpha_1 + \alpha_2 + \alpha_1 \alpha_2))) \bigg) \\ & \quad (d_2^2 (1 + s) (r - s t_2 + r s t_2) (\alpha_1 + \alpha_2 + \alpha_1 \alpha_2) + (-1 + p_2) (-1 + t_2) \\ & \quad (2 + 2 \alpha_1 - t_2 \alpha_1 - p_2 t_2 \alpha_1 + p_2 r t_2 \alpha_1 + 2 t_2 \alpha_2 - p_2 t_2 \alpha_2 + p_2 r t_2 \alpha_2 + \\ & \quad 2 t_2 \alpha_1 \alpha_2 - p_2 t_2 \alpha_1 \alpha_2 + p_2 r t_2 \alpha_1 \alpha_2 - t_2^2 \alpha_1 \alpha_2 + s^2 t_2^2 (2 + (2 + p_2 (-1 + r)) \\ & \quad \alpha_2 + (1 + p_2 (-1 + r)) \alpha_1 (1 + \alpha_2)) + s t_2 (4 + (2 + p_2 (-1 + r)) \\ & \quad (1 + t_2) \alpha_2 + \alpha_1 (3 - t_2 + 2 \alpha_2 + p_2 (-1 + r) (1 + t_2) (1 + \alpha_2)))) + \\ & \quad d_2 (2 + 2 \alpha_1 - t_2 \alpha_1 - p_2 t_2 \alpha_1 + 2 t_2 \alpha_2 - p_2 t_2 \alpha_2 + 2 t_2 \alpha_1 \alpha_2 - p_2 t_2 \alpha_1 \alpha_2 - \end{aligned}$$



$$\begin{aligned}
& t^2 \alpha_1 \alpha_2 + s t^2 (4 + \alpha_2 + 3 t^2 \alpha_2 - 2 p_2 t^2 \alpha_2 + \alpha_1 \\
& \quad (2 + \alpha_2 + t^2 \alpha_2 - 2 p_2 t^2 (1 + \alpha_2))) + s^2 t^2 ((-1 + p_2) (\alpha_1 + \alpha_2 + \alpha_1 \alpha_2) + \\
& \quad t^2 (2 + 3 \alpha_2 - 2 p_2 \alpha_2 - 2 (-1 + p_2) \alpha_1 (1 + \alpha_2))) + r (1 + s) \\
& \quad (-2 - p_2 \alpha_2 - 2 t^2 \alpha_2 + 2 p_2 t^2 \alpha_2 + \alpha_1 (-1 - t^2 \alpha_2 + p_2 (-1 + 2 t^2) (1 + \alpha_2))) + \\
& \quad s t^2 (-2 - \alpha_2 - t^2 (\alpha_1 + \alpha_2 + \alpha_1 \alpha_2) + p_2 (-1 + 2 t^2) (\alpha_1 + \alpha_2 + \alpha_1 \alpha_2))) - \\
& (1 + s) (d^2 (r + s - s t^2 + r s t^2) (\alpha_1 + \alpha_2 + \alpha_1 \alpha_2) + (-1 + p_2) t^2 \\
& \quad (2 + p_2 \alpha_2 - p_2 r \alpha_2 + 2 t^2 \alpha_2 - p_2 t^2 \alpha_2 + p_2 r t^2 \alpha_2 + 2 s^2 t^2 (1 + \alpha_2) - \\
& \quad (-1 + t^2) \alpha_1 (1 + t^2 \alpha_2 - p_2 (-1 + r) (1 + \alpha_2))) + s t^2 (4 + p_2 (-1 + r) (-1 + t^2) \\
& \quad \alpha_2 + 2 (1 + t^2) \alpha_2 + (-1 + p_2 (-1 + r)) (-1 + t^2) \alpha_1 (1 + \alpha_2))) + \\
& d^2 (2 + \alpha_1 + p_2 \alpha_1 - t^2 \alpha_1 - p_2 t^2 \alpha_1 + p_2 \alpha_2 + 2 t^2 \alpha_2 - p_2 t^2 \alpha_2 + p_2 \alpha_1 \alpha_2 + \\
& \quad t^2 \alpha_1 \alpha_2 - p_2 t^2 \alpha_1 \alpha_2 - t^2 \alpha_1 \alpha_2 + 2 s^2 t^2 (1 + \alpha_2) + \\
& \quad s t^2 (4 + \alpha_2 + 3 t^2 \alpha_2 - 2 p_2 (-1 + t^2) (\alpha_1 + \alpha_2 + \alpha_1 \alpha_2))) + \\
& \quad r (-2 - p_2 \alpha_2 - 2 t^2 \alpha_2 + 2 p_2 t^2 \alpha_2 + \alpha_1 (-1 - t^2 \alpha_2 + p_2 (-1 + 2 t^2) (1 + \alpha_2))) + s \\
& \quad t^2 (-2 - \alpha_2 - t^2 (\alpha_1 + \alpha_2 + \alpha_1 \alpha_2) + p_2 (-1 + 2 t^2) (\alpha_1 + \alpha_2 + \alpha_1 \alpha_2))) - \\
& (d^2 (1 + s) (r - s t^2 + r s t^2) (\alpha_1 + \alpha_2 + \alpha_1 \alpha_2) + p_2 (-1 + t^2) \\
& \quad (2 + 2 \alpha_1 - t^2 \alpha_1 - p_2 t^2 \alpha_1 - r t^2 \alpha_1 + p_2 r t^2 \alpha_1 + 2 t^2 \alpha_2 - p_2 t^2 \alpha_2 - r t^2 \alpha_2 + \\
& \quad p_2 r t^2 \alpha_2 + 2 t^2 \alpha_1 \alpha_2 - p_2 t^2 \alpha_1 \alpha_2 - r t^2 \alpha_1 \alpha_2 + p_2 r t^2 \alpha_1 \alpha_2 - t^2 \alpha_1 \alpha_2 + \\
& \quad s^2 t^2 (2 + (2 + p_2 (-1 + r) - r) \alpha_2 + (-1 + p_2) (-1 + r) \alpha_1 (1 + \alpha_2))) + \\
& \quad s t^2 (4 + (2 + p_2 (-1 + r) - r) (1 + t^2) \alpha_2 + \alpha_1 \\
& \quad (3 - t^2 + 2 \alpha_2 + p_2 (-1 + r) (1 + t^2) (1 + \alpha_2) - r (1 + t^2) (1 + \alpha_2)))) + \\
& d^2 (2 + 2 \alpha_1 - t^2 \alpha_1 - p_2 t^2 \alpha_1 + 2 t^2 \alpha_2 - p_2 t^2 \alpha_2 + 2 t^2 \alpha_1 \alpha_2 - p_2 t^2 \alpha_1 \alpha_2 - \\
& \quad t^2 \alpha_1 \alpha_2 + s t^2 (4 + 2 (1 + t^2 - p_2 t^2) \alpha_2 - \alpha_1 (-3 + t^2 - 2 \alpha_2 + 2 p_2 t^2 (1 + \alpha_2))) + \\
& \quad s^2 t^2 (p_2 (\alpha_1 + \alpha_2 + \alpha_1 \alpha_2) + t^2 (2 + 2 \alpha_2 - 2 p_2 \alpha_2 - (-1 + 2 p_2) \alpha_1 (1 + \alpha_2))) + \\
& \quad r (1 + s) (-2 - p_2 \alpha_2 - 2 t^2 \alpha_2 + 2 p_2 t^2 \alpha_2 + \alpha_1 \\
& \quad (-1 - t^2 \alpha_2 + p_2 (-1 + 2 t^2) (1 + \alpha_2))) + s t^2 \\
& \quad (-2 - \alpha_2 - t^2 (\alpha_1 + \alpha_2 + \alpha_1 \alpha_2) + p_2 (-1 + 2 t^2) (\alpha_1 + \alpha_2 + \alpha_1 \alpha_2))) - \\
& (4 (1 + s t^2)^2 (1 + s t^2 + \alpha_1 - t^2 \alpha_1)^2 (1 + t^2 \alpha_2 + s t^2 (1 + \alpha_2))^2) \} /
\end{aligned}$$

As in 2.1.1, the edges  $t_2 = 0$  and  $t_2 = 1$  consist of equilibria.

## 2.4.2 Stability of edge equilibria

Jacobian at  $t_2 = 0$ :

`Simplify[D[delitgenNoMig, {{p2, t2, d2}}] /. {t2 -> 0, d2 -> 0}]`

$$\begin{aligned}
& \left\{ \left\{ 0, 0, \frac{1}{2(1 + \alpha_1)} (p_2 \alpha_2 + \alpha_1 (-1 + p_2 + p_2 \alpha_2) + s (2 + p_2 \alpha_2 + \alpha_1 (1 + p_2 + p_2 \alpha_2))) \right\}, \right. \\
& \left\{ 0, -1 + \frac{(1 + s) (2 + p_2 \alpha_2 + \alpha_1 (1 + p_2 + p_2 \alpha_2))}{2(1 + \alpha_1)}, 0 \right\}, \\
& \left\{ 0, -\frac{(-1 + p_2) p_2 r (1 + s) (\alpha_1 + \alpha_2 + \alpha_1 \alpha_2)}{2(1 + \alpha_1)}, \frac{1}{2(1 + \alpha_1)} (-\alpha_1 + p_2 \alpha_1 + p_2 \alpha_2 + p_2 \alpha_1 \alpha_2 + \right. \\
& \quad \left. s (2 + \alpha_1 + p_2 \alpha_1 + p_2 \alpha_2 + p_2 \alpha_1 \alpha_2) - r (1 + s) (2 + p_2 \alpha_2 + \alpha_1 (1 + p_2 + p_2 \alpha_2))) \right\} \}
\end{aligned}$$

Eigenvalues:

**eigenvt20 = Simplify[Eigenvalues[%]]**

$$\left\{ 0, \frac{1}{2(1+\alpha_1)} \left( p_2 \alpha_2 + \alpha_1 (-1 + p_2 + p_2 \alpha_2) + s (2 + p_2 \alpha_2 + \alpha_1 (1 + p_2 + p_2 \alpha_2)) \right), \right. \\ \left. \frac{1}{2(1+\alpha_1)} \left( -\alpha_1 + p_2 \alpha_1 + p_2 \alpha_2 + p_2 \alpha_1 \alpha_2 + \right. \right. \\ \left. \left. s (2 + \alpha_1 + p_2 \alpha_1 + p_2 \alpha_2 + p_2 \alpha_1 \alpha_2) - r (1 + s) (2 + p_2 \alpha_2 + \alpha_1 (1 + p_2 + p_2 \alpha_2)) \right) \right\}$$

**Simplify[eigenvt20[[3]] - eigenvt20[[2]]]**

$$- \frac{r (1 + s) (2 + p_2 \alpha_2 + \alpha_1 (1 + p_2 + p_2 \alpha_2))}{2 (1 + \alpha_1)}$$

This is always negative! Thus, the second ev is always larger than the third! (This could be also inferred from the analysis of the characteristic polynomials cpolgenT20noR and cpolgenT20R in Section 2.1.2)

Hence, stability is determined by the second eigenvalue.

**Simplify[Series[Numerator[eigenvt20[[2]]], {p2, 0, 2}] // Normal**

$$-\alpha_1 + s (2 + \alpha_1) + p_2 (1 + s) (\alpha_1 + \alpha_2 + \alpha_1 \alpha_2)$$

This is strictly monotone increasing in  $p_2$ . Therefore, stability of equilibria on this edge changes at:

**Simplify[Solve[-α1 + s (2 + α1) + p2 (1 + s) (α1 + α2 + α1 α2) == 0, p2]]**

$$\left\{ \left\{ p_2 \rightarrow \frac{\alpha_1 - s (2 + \alpha_1)}{(1 + s) (\alpha_1 + \alpha_2 + \alpha_1 \alpha_2)} \right\} \right\}$$

Analogously, one obtains the value of  $p_2$  at  $t_2 = 1$ , at which stability of equilibria changes (i.e., for smaller  $p_2$ , equilibria are stable, for larger they are unstable).

Important points on the edges  $t_2 = 0$ ,  $t_2 = 1$  :

$$p_{2t_2=0ast} = \frac{\alpha_1 - s (2 + \alpha_1)}{(1 + s) (\alpha_1 + \alpha_2 + \alpha_1 \alpha_2)};$$

$$p_{2t_2=1ast} = \frac{(\alpha_1 - 2s) (1 + \alpha_2)}{\alpha_1 + \alpha_2 + \alpha_1 \alpha_2};$$

We observe that :

$$0 < p_{2t_2=0ast} < 1 \text{ if and only if } \frac{\alpha_1}{2 + \alpha_1} > s;$$

$$0 < p_{2t_2=1ast} < 1 \text{ if and only if } \alpha_1 > 2s.$$

**Simple considerations show the following**

**Edge  $t_2 = 0$ :**

(a) If  $\frac{\alpha_1}{2 + \alpha_1} < s$ , then  $p_{2t_2=0ast} \leq 0$  and all equilibria are unstable.

The condition  $\frac{\alpha_1}{2 + \alpha_1} < s$  is equivalent to  $s \geq 1$  or  $(s < 1 \text{ and } \alpha_1 < \frac{2s}{1-s})$ .

(b) If  $\frac{\alpha_1}{2 + \alpha_1} > s$ , then  $0 < p_{2t_2=0ast} < 1$  and equilibria with  $p_2 < p_{2t_2=0ast}$  are stable, and equilibria with  $p_2 > p_{2t_2=0ast}$  are unstable.

The condition  $\frac{\alpha_1}{2+\alpha_1} > s$  is equivalent to  $s < 1$  and  $\alpha_1 > \frac{2s}{1-s}$ .

**Edge  $t_2 = 1$ :**

(a) If  $\frac{\alpha_1}{2} \leq s$ , then  $p_{2t_1ast} \leq 0$  and all equilibria are stable.

(b) If  $\frac{\alpha_1}{2} > s$ , then  $0 < p_{2t_1ast} < 1$  and equilibria  $p_2 < p_{2t_1ast}$  are unstable and equilibria  $p_2 > p_{2t_1ast}$  are stable.

If  $\frac{\alpha_1}{2+\alpha_1} < s < \frac{\alpha_1}{2}$ , the equilibrium  $p_2=0$  and  $t_2 = \frac{\alpha_1-s(2+\alpha_1)}{2s(s-\alpha_1)}$  exists. It is the endpoint of a curve and stable.

### 2.4.3 Determining the curve of polymorphic equilibria

The following shows that the equilibrium conditions for  $p_2$  and  $t_2$  are proportional (hence, there will be a curve of polymorphic equilibria):

`Simplify[delitgenNoMig[[1]] / delitgenNoMig[[2]]]`

$$\frac{d_2}{t_2 - t_2^2}$$

`Numerator[Factor[delitgenNoMig[[2]]]]`

Compute  $d_2$  as a function of  $p_2$  and  $t_2$  `delitgenNoMig[[2]]` :

`FullSimplify[Solve[delitgenNoMig[[2]] == 0, d2]]`

Substitute this into `delitgenNoMig[[3]]` to compute  $p_2$

`Simplify[Numerator[Factor[delitgenNoMig[[3]] /. d2 → -(( (1 + s t2) ((-1 + p2) α1 + s (2 + 2 s t2 + (1 + p2 - 2 t2) α1)) + (1 + s) (-t2 α1 + p2 (1 + s t2) (1 + α1) + s t2 (2 + 2 s t2 + α1 - 2 t2 α1)) α2) / (s (1 + s) (α1 + α2 + α1 α2)))]]`

The above is quadratic in  $p_2$  (and  $r$  is just a factor). Solve for  $p_2$  :

`Simplify[Solve[% == 0, p2], Assumptions → {s > 0, t2 ≥ 0, α1 > 0, α2 > 0, r > 0}]`

A straightforward analysis shows that only the second solution is admissible.

Therefore, we obtain the following curve of equilibria as a function of  $t_2$  (and the other parameters):

```

p2curve[t2_, s_, a1_, a2_] := - 
$$\frac{1}{(1+s)^2 (1+s t2) (\alpha1 + \alpha2 + \alpha1 \alpha2)}$$

(3 s + 2 s^2 + 8 s^2 t2 + 5 s^3 t2 + 7 s^3 t2^2 + 4 s^4 t2^2 + 2 s^4 t2^3 + s^5 t2^3 - \alpha1 + s \alpha1 + s^2 \alpha1 -
4 s t2 \alpha1 + s^2 t2 \alpha1 + 2 s^3 t2 \alpha1 - 5 s^2 t2^2 \alpha1 - s^3 t2^2 \alpha1 + s^4 t2^2 \alpha1 - 2 s^3 t2^3 \alpha1 -
s^4 t2^3 \alpha1 + 3 s t2 \alpha2 + 5 s^2 t2 \alpha2 + 2 s^3 t2 \alpha2 + 5 s^2 t2^2 \alpha2 + 8 s^3 t2^2 \alpha2 + 3 s^4 t2^2 \alpha2 +
2 s^3 t2^3 \alpha2 + 3 s^4 t2^3 \alpha2 + s^5 t2^3 \alpha2 - t2 \alpha1 \alpha2 + 2 s^2 t2 \alpha1 \alpha2 + s^3 t2 \alpha1 \alpha2 - 3 s t2^2 \alpha1 \alpha2 -
3 s^2 t2^2 \alpha1 \alpha2 + s^3 t2^2 \alpha1 \alpha2 + s^4 t2^2 \alpha1 \alpha2 - 2 s^2 t2^3 \alpha1 \alpha2 - 3 s^3 t2^3 \alpha1 \alpha2 -
s^4 t2^3 \alpha1 \alpha2 - s \sqrt{((1+s t2) (1+s t2 + \alpha1 - t2 \alpha1) (1+t2 \alpha2 + s t2 (1+\alpha2))
(1+\alpha1 - t2 \alpha1 + t2 \alpha2 + s^5 t2^3 (1+\alpha2) + s t2 (5 - 2 (-1+t2) \alpha1 + (3+2 t2) \alpha2) +
s^4 t2^2 (5 + (4+t2) \alpha2 - (-1+t2) \alpha1 (1+\alpha2)) +
s^3 t2 (-t2^2 \alpha1 \alpha2 + (2+\alpha1) (2+\alpha2) + t2 (6 - 2 \alpha1 + 8 \alpha2)) +
s^2 t2 (6 + 4 \alpha2 + \alpha1 (2+\alpha2) + t2 (4 + 6 \alpha2 - \alpha1 (2+\alpha2))))));

d2curve[t2_, s_, a1_, a2_] := 
$$\frac{1}{(1+s)^2 (\alpha1 + \alpha2 + \alpha1 \alpha2)}$$

(1 + 4 s t2 + s^2 t2 + 5 s^2 t2^2 + 2 s^3 t2^2 + 2 s^3 t2^3 + s^4 t2^3 + \alpha1 - t2 \alpha1 + 3 s t2 \alpha1 + s^2 t2 \alpha1 -
3 s t2^2 \alpha1 + s^2 t2^2 \alpha1 + s^3 t2^2 \alpha1 - 2 s^2 t2^3 \alpha1 - s^3 t2^3 \alpha1 + t2 \alpha2 + s t2 \alpha2 + 3 s t2^2 \alpha2 +
4 s^2 t2^2 \alpha2 + s^3 t2^2 \alpha2 + 2 s^2 t2^3 \alpha2 + 3 s^3 t2^3 \alpha2 + s^4 t2^3 \alpha2 + t2 \alpha1 \alpha2 + s t2 \alpha1 \alpha2 -
t2^2 \alpha1 \alpha2 + s t2^2 \alpha1 \alpha2 + 3 s^2 t2^2 \alpha1 \alpha2 + s^3 t2^2 \alpha1 \alpha2 - 2 s t2^3 \alpha1 \alpha2 - 3 s^2 t2^3 \alpha1 \alpha2 -
s^3 t2^3 \alpha1 \alpha2 - \sqrt{((1+s t2) (1+s t2 + \alpha1 - t2 \alpha1) (1+t2 \alpha2 + s t2 (1+\alpha2))
(1+\alpha1 - t2 \alpha1 + t2 \alpha2 + s^5 t2^3 (1+\alpha2) + s t2 (5 - 2 (-1+t2) \alpha1 + (3+2 t2) \alpha2) +
s^4 t2^2 (5 + (4+t2) \alpha2 - (-1+t2) \alpha1 (1+\alpha2)) +
s^3 t2 (-t2^2 \alpha1 \alpha2 + (2+\alpha1) (2+\alpha2) + t2 (6 - 2 \alpha1 + 8 \alpha2)) +
s^2 t2 (6 + 4 \alpha2 + \alpha1 (2+\alpha2) + t2 (4 + 6 \alpha2 - \alpha1 (2+\alpha2))))));

```

It indeed connects (p2t0ast, 0, 0) with (p2t1ast, 1, 0).

## 2.4.4 Graphs

```

ParametricPlot3D[{t2, p2curve[t2, 0.2, 10, 10], d2curve[t2, 0.2, 10, 10]}, {t2, 0, 1},
PlotRange -> {{0, 1}, {0, 1}, {0, 0.15}}, BoxRatios -> 1, AxesLabel -> {t2, p2, D}

```

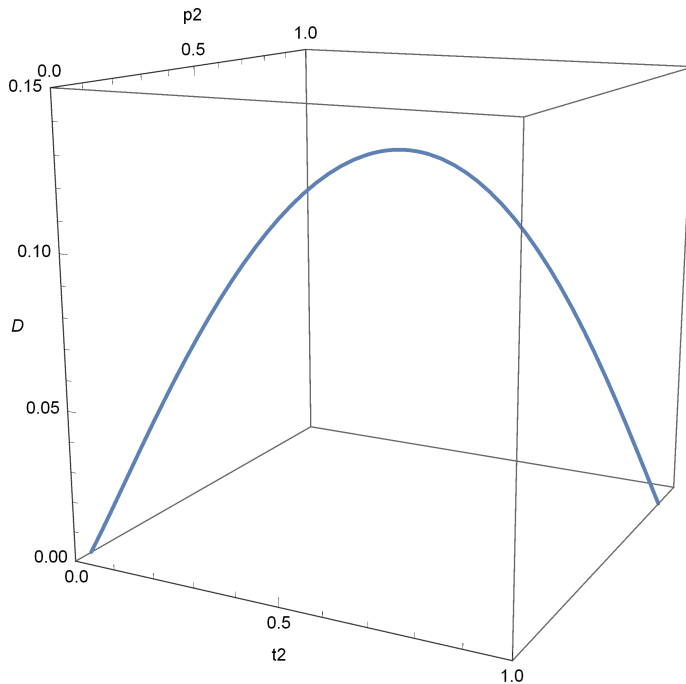

## 2.4.5. Properties of the curve (summary)

If  $s < \frac{\alpha_1}{2}$ , the curve exists and connects equilibria on the boundary as follows: 

1. If  $\frac{\alpha_1}{2 + \alpha_1} < s$  (or, equivalently,  $\alpha_1 > \frac{2s}{1-s}$  and  $s < 1$ ),

then it connects  $(p_2, t_2, d_2) = (p_{2t0ast}, 0, 0)$  with  $(p_{2t1ast}, 1, 0)$ .

2. If  $\frac{\alpha_1}{2 + \alpha_1} < s < \frac{\alpha_1}{2}$ ,

then it connects  $(p_2, t_2, d_2) = \left(0, \frac{\alpha_1 - s(2 + \alpha_1)}{2s(s - \alpha_1)}, 0\right)$  with  $(p_{2t1ast}, 1, 0)$ .

Note that case 2 does not exist if selection acts only on males.

If  $s > \frac{\alpha_1}{2}$ , then the edge  $t_2 = 1$  is stable, i.e.,

trajectories from the interior converge to some point on this edge (or value  $p_2$ ).

It can also be shown that the two nonzero eigenvalues at the curve equilibria are negative. Hence, the curve is attracting.

## ■ 3. Numerics

### 3.1 3D Graphs

#### 3.1.1 Computing the curve of equilibria for $r > 0$

Here is a list of points at the equilibrium curve (in deme 2) generated by forward iteration from many initial conditions and adding the two endpoints of the curve (see Section 2.1.2). The parameters are  $s_1=s_2=0.2$ ,  $\alpha_1=\alpha_2=10$ ,  $m_1=m_2=0.01$ .

```
curvetestcor = {{0, 0, 0}, {0.0543, 0, 0},
  {0.05660184549540463, 0.0037979456900286836, 0.08956592091594318},
  {0.06293855717352347, 0.01416124988810209, 0.16830729752874554},
  {0.06697210466039187, 0.020735137757946442, 0.20034661333909676},
  {0.07187476326385878, 0.028698339084111516, 0.2312458954044843},
  {0.07544512372411044, 0.034477312711836634, 0.2501032537113619},
  {0.07717254954432423, 0.03726690132983597, 0.25839209179040895},
  {0.08083017489183085, 0.043159256993953836, 0.27447405890270077},
  {0.08633379352554969, 0.05198773295467537, 0.2956236194244254},
  {0.08761521824010333, 0.054036622403928584, 0.300111656227197},
  {0.08973001650999651, 0.05741239751113015, 0.3072066941250179},
  {0.09814867464065638, 0.07078034924694529, 0.3321888747519035},
  {0.10864419728816559, 0.08728515952065873, 0.3577159585557959},
  {0.10870477365339459, 0.08737989463453665, 0.3578488302527233},
  {0.11127287951672861, 0.09139058129873132, 0.3633491761294169},
```

```

{0.11812426799323449`, 0.10203735791085268`, 0.37686452761090644`},
{0.11901022085398592`, 0.10340843611575098`, 0.37850044234757785`},
{0.1209895230416802`, 0.10646687804899065`, 0.38207056269203943`},
{0.12917967091488097`, 0.11905387276980248`, 0.3957093973091313`},
{0.13817711838388322`, 0.1327550965517995`, 0.4088825748528965`},
{0.14470515205365492`, 0.1426138843371581`, 0.41744699919639994`},
{0.15706596239702128`, 0.16109541730424295`, 0.4317699225248873`},
{0.1896641867757147`, 0.20870873113438498`, 0.4607171431040528`},
{0.20759819201782306`, 0.23424062261727313`, 0.4727135883051294`},
{0.2134783491466003`, 0.2425143551970263`, 0.4761834705190131`},
{0.21779411537695048`, 0.24855696602625846`, 0.4786008647940324`},
{0.23519344478351012`, 0.27266725572017686`, 0.4873474570893123`},
{0.24511873060981698`, 0.28624545557885095`, 0.4916974110617419`},
{0.2922048377543788`, 0.34903103154930987`, 0.5073368199586237`},
{0.3149159753823795`, 0.37841264105294037`, 0.5125151968552388`},
{0.3174900231636321`, 0.3817077853226969`, 0.5130211497579203`},
{0.33129893831153834`, 0.39926742753133965`, 0.5154762025192541`},
{0.3359364468607152`, 0.4051207696824208`, 0.5162065531815315`},
{0.34534059458250055`, 0.41692429037741024`, 0.5175494289931301`},
{0.3667408164820048`, 0.4434631850094184`, 0.519954015721805`},
{0.3784466413933181`, 0.45779694161704004`, 0.5209094747718551`},
{0.38287673965708674`, 0.4631887979796312`, 0.5212078563674708`},
{0.4076699312356923`, 0.49304216287247343`, 0.5222645091159591`},
{0.40888996243457`, 0.4944973931147247`, 0.52229039235307`},
{0.40915658900192814`, 0.49481525118937486`, 0.5222957297700026`},
{0.4339569087470273`, 0.5241207307124023`, 0.5223001359510501`},
{0.4446090855901148`, 0.5365539498479851`, 0.5220086853028184`},
{0.4699251377135113`, 0.5657472827711086`, 0.5206226004516094`},
{0.47848775667480375`, 0.5755115234140892`, 0.5199338701986029`},
{0.47851970199604676`, 0.57554785025021`, 0.5199310922645882`},
{0.4792329740687634`, 0.5763587571519981`, 0.5198686627458622`},
{0.48643317738660835`, 0.5845237330803713`, 0.5191950770289251`},
{0.4949159898914635`, 0.5940951213831318`, 0.5182997888217864`},
{0.5159926309422291`, 0.6176568952074447`, 0.515592548504511`},
{0.5249854564755814`, 0.6276171547980913`, 0.5142237933026124`},
{0.5371679561106322`, 0.6410239976729145`, 0.512160036073494`},
{0.5404446474354232`, 0.6446133260559913`, 0.5115630154593267`},
{0.5413684583424265`, 0.6456240160053848`, 0.5113914369495139`},
{0.5420332714962874`, 0.6463510079923273`, 0.5112670711865185`},
{0.5439349817158053`, 0.6484290003160936`, 0.5109071912816989`},
{0.571784036425194`, 0.6785959990488386`, 0.5049139310684305`},
{0.5742766392404987`, 0.6812724667109248`, 0.5043091051332322`},
{0.576837201336487`, 0.6840179458670907`, 0.5036756170201854`},
{0.5894437181868252`, 0.6974769183145952`, 0.5003725862976591`},
{0.5946632739946408`, 0.7030215332474032`, 0.49891281837638485`},
{0.5979969238483621`, 0.7065543430834157`, 0.4979513536919065`},
{0.60491162289776`, 0.7138613077245021`, 0.4958829286847526`},
{0.6074027448992102`, 0.7164869042863247`, 0.4951127345087458`},
{0.6295483657040672`, 0.739670959814192`, 0.48765154270459543`},
{0.6382138932160628`, 0.7486670930088165`, 0.4844128844618195`},
{0.6415082123927798`, 0.7520760713559929`, 0.4831314693576045`},
{0.6433063614338183`, 0.7539342551416135`, 0.4824200421399131`},
{0.6474924239835468`, 0.7582531226112944`, 0.48073042924068976`},
{0.6517098416131714`, 0.7625945304106434`, 0.47897986266862896`},
{0.656967634858931`, 0.7679931634915529`, 0.4767275694047644`},

```

```
{0.6635058538773997`, 0.7746853362417472`, 0.47381473882984537`},
{0.673442257398772`, 0.7848109264476019`, 0.4691382168575423`},
{0.6864834319878824`, 0.7980186716833192`, 0.46251015574925536`},
{0.6874402827624676`, 0.7989840923306586`, 0.46200061403011555`},
{0.6882878535959853`, 0.7998388369551203`, 0.46154651291756243`},
{0.6890406903600791`, 0.800597716812932`, 0.4611409840507769`},
{0.6922989018062435`, 0.8038785126162025`, 0.4593619090714377`},
{0.6961184813158338`, 0.8077171736643235`, 0.4572256728998312`},
{0.6969205193530782`, 0.8085222030191773`, 0.4567700152578396`},
{0.698793776837788`, 0.8104010720140574`, 0.4556960186491584`},
{0.7203909710548612`, 0.8319225862253015`, 0.44225752147076`},
{0.7317880631593816`, 0.8431734688989039`, 0.4342985217686242`},
{0.7334223430227556`, 0.8447805921595001`, 0.43310278562944093`},
{0.7382808652967848`, 0.8495490260243432`, 0.4294626610617528`},
{0.7384769545256583`, 0.8497411828467468`, 0.4293130062291318`},
{0.74160938747052`, 0.8528076438223302`, 0.42689273729456756`},
{0.7619357973570297`, 0.8725558572268646`, 0.40971888713657334`},
{0.7695145612414444`, 0.8798480733153262`, 0.4025889141564653`},
{0.7723627821992717`, 0.8825778492241741`, 0.39979540339410563`},
{0.7759494703646802`, 0.886006663591593`, 0.39618424353839315`},
{0.7768751778771739`, 0.8868900082206609`, 0.39523483717156965`},
{0.7810743847121827`, 0.8908884646848251`, 0.3908354763542134`},
{0.7984358528426314`, 0.9072564679952063`, 0.3708803298969047`},
{0.8015210591546166`, 0.9101343693730436`, 0.36700490240665773`},
{0.8108252528857616`, 0.9187478521743578`, 0.3546357642396313`},
{0.811331533473403`, 0.9192135034258367`, 0.35393164651384595`},
{0.8143056601135491`, 0.9219420875253119`, 0.34972690940189294`},
{0.8165385396788698`, 0.923982611809436`, 0.3464913131256027`},
{0.8263023333386098`, 0.9328156197867329`, 0.33149425270135274`},
{0.8418273198029743`, 0.9464871298307743`, 0.3044335414653078`},
{0.844379779046111`, 0.9486796476216544`, 0.2995595442428612`},
{0.8482777314932839`, 0.951991435568306`, 0.2918637209630855`},
{0.8519604417927931`, 0.9550757621266964`, 0.28430192523648307`},
{0.8532439822946108`, 0.9561396687169569`, 0.2815979587194742`},
{0.8614468864597258`, 0.9627848979299587`, 0.26344929769419717`},
{0.8761036718543275`, 0.9738113661703788`, 0.2271314418759672`},
{0.8769685155710457`, 0.9744195610745443`, 0.2248323831818406`},
{0.877275490470237`, 0.9746341306033633`, 0.2240122861274224`},
{0.8855047036089843`, 0.9801096353904881`, 0.20127326166811996`},
{0.8909469842157165`, 0.9834051663463637`, 0.18551729997724517`},
{0.9031038766252986`, 0.9896823612150077`, 0.14889336604266454`},
{0.9076458532821965`, 0.9916160065182898`, 0.13494426712407512`},
{0.9114143286570854`, 0.9930481602067847`, 0.12335228482418856`},
{0.9280481225312094`, 0.9976275374149793`, 0.07263886559671419`},
{0.934476877938098`, 0.9987362821293031`, 0.052907308944191794`},
{0.945715`, 1, 0}, {1., 1., 0}};
```

```
f10cor = BSplineFunction[curvetestcor];
plotcurveequilcor10 = ParametricPlot3D[f10cor[x], {x, 0, 1},
  PlotRange → {{0, 1}, {0, 1}, {0, 0.6}}, BoxRatios → {1, 1, 0.6}, PlotStyle → Black]
```

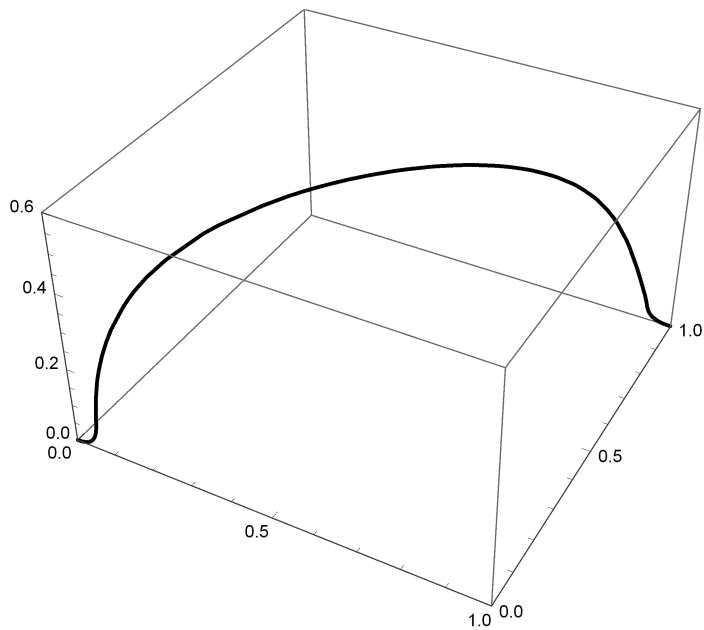

### 3.1.2 Generating Figure 3b (see main text for details)

```

datsymfix1[p20_, t20_, dd0_, s_, α_, m_, r_, tend_] :=
  datsymfix1[p20, t20, dd0, s, α, m, r, tend] = NestList[itgen[s, s, α, α, m, m, r],
    {0, 0, 0, p2, t2, dd} /. {p2 → p20, t2 → t20, dd → dd0}, tend]

```

```

initphm = {{0.99, 0.99, 0.99 * 0.01}, {0.95, 0.95, 0.05 * 0.95}, {0.9, 0.9, 0.1 * 0.9},
  {0.8, 0.8, 0.2 * 0.8}, {0.7, 0.7, 0.3 * 0.7}, {0.6, 0.6, 0.4 * 0.6}};

```

```

tabdatphmfix1[ss_, αα_, mm_, r_, tend_] [nvals_] :=
  Table[{n, Transpose[Table[datsymfix1[initphm[[i, 1]], initphm[[i, 2]],
    initphm[[i, 3]], ss, αα, mm, r, tend] [[n]] // Chop, {i, 1, 6}]]], {n, nvals}]

```

Data for specific generations ({1, 10, 50, 100, 250, 500, 1000}):



```
Round[10^4 * tabdatphmfix1[0.2, 10, 0.01, 0.1, 2000] [
  {1, 10, 50, 100, 250, 500, 1000, 2000}]] / 10^4. // TableForm
```

|       |        |        |        |        |        |        |
|-------|--------|--------|--------|--------|--------|--------|
|       | 0.     | 0.     | 0.     | 0.     | 0.     | 0.     |
|       | 0.     | 0.     | 0.     | 0.     | 0.     | 0.     |
| 1.    | 0.     | 0.     | 0.     | 0.     | 0.     | 0.     |
|       | 0.99   | 0.95   | 0.9    | 0.8    | 0.7    | 0.6    |
|       | 0.99   | 0.95   | 0.9    | 0.8    | 0.7    | 0.6    |
|       | 0.0099 | 0.0475 | 0.09   | 0.16   | 0.21   | 0.24   |
|       | 0.0157 | 0.0156 | 0.0155 | 0.015  | 0.0143 | 0.0132 |
|       | 0.0113 | 0.0112 | 0.0111 | 0.0108 | 0.0103 | 0.0095 |
| 10.   | 0.0095 | 0.0094 | 0.0093 | 0.009  | 0.0085 | 0.0078 |
|       | 0.9834 | 0.9797 | 0.9746 | 0.961  | 0.938  | 0.8983 |
|       | 0.9885 | 0.9876 | 0.9857 | 0.9777 | 0.9589 | 0.922  |
|       | 0.0096 | 0.0103 | 0.0117 | 0.0177 | 0.0319 | 0.0596 |
|       | 0.0541 | 0.0538 | 0.0534 | 0.0525 | 0.0515 | 0.0502 |
|       | 0.0191 | 0.019  | 0.0189 | 0.0186 | 0.0182 | 0.0178 |
| 50.   | 0.0149 | 0.0148 | 0.0146 | 0.0143 | 0.0139 | 0.0133 |
|       | 0.9448 | 0.9403 | 0.9346 | 0.9222 | 0.9073 | 0.8877 |
|       | 0.9806 | 0.9794 | 0.9778 | 0.9738 | 0.9682 | 0.9594 |
|       | 0.0152 | 0.016  | 0.0172 | 0.0199 | 0.0237 | 0.0293 |
|       | 0.117  | 0.1158 | 0.1142 | 0.111  | 0.1075 | 0.1035 |
|       | 0.0425 | 0.0418 | 0.0409 | 0.039  | 0.0369 | 0.0344 |
| 100.  | 0.0289 | 0.0284 | 0.0277 | 0.0262 | 0.0245 | 0.0225 |
|       | 0.8809 | 0.8737 | 0.8642 | 0.8427 | 0.8158 | 0.7804 |
|       | 0.9564 | 0.9525 | 0.9471 | 0.9334 | 0.9139 | 0.8854 |
|       | 0.0296 | 0.0319 | 0.0351 | 0.0428 | 0.0531 | 0.0669 |
|       | 0.3275 | 0.3197 | 0.3101 | 0.2913 | 0.2718 | 0.251  |
|       | 0.2164 | 0.2085 | 0.1989 | 0.1801 | 0.161  | 0.1408 |
| 250.  | 0.0938 | 0.0911 | 0.0878 | 0.081  | 0.0737 | 0.0655 |
|       | 0.6678 | 0.6573 | 0.6443 | 0.6174 | 0.588  | 0.5546 |
|       | 0.7789 | 0.7683 | 0.755  | 0.7272 | 0.6963 | 0.6605 |
|       | 0.0953 | 0.0984 | 0.1021 | 0.1092 | 0.1159 | 0.1221 |
|       | 0.3694 | 0.3601 | 0.3489 | 0.3267 | 0.3039 | 0.2795 |
|       | 0.2592 | 0.2496 | 0.238  | 0.2153 | 0.1923 | 0.168  |
| 500.  | 0.1031 | 0.1006 | 0.0973 | 0.0905 | 0.0829 | 0.0742 |
|       | 0.6258 | 0.6163 | 0.6045 | 0.58   | 0.5533 | 0.5226 |
|       | 0.7358 | 0.7259 | 0.7134 | 0.6875 | 0.6586 | 0.625  |
|       | 0.1044 | 0.1068 | 0.1097 | 0.1151 | 0.12   | 0.1245 |
|       | 0.3702 | 0.3609 | 0.3496 | 0.3273 | 0.3045 | 0.28   |
|       | 0.26   | 0.2504 | 0.2387 | 0.216  | 0.1929 | 0.1685 |
| 1000. | 0.1033 | 0.1007 | 0.0975 | 0.0907 | 0.0831 | 0.0744 |
|       | 0.6251 | 0.6156 | 0.6038 | 0.5794 | 0.5526 | 0.522  |
|       | 0.735  | 0.7251 | 0.7127 | 0.6867 | 0.6579 | 0.6243 |
|       | 0.1045 | 0.107  | 0.1098 | 0.1152 | 0.1201 | 0.1245 |
|       | 0.3702 | 0.3609 | 0.3496 | 0.3273 | 0.3045 | 0.28   |
|       | 0.26   | 0.2504 | 0.2387 | 0.216  | 0.1929 | 0.1685 |
| 2000. | 0.1033 | 0.1007 | 0.0975 | 0.0907 | 0.0831 | 0.0744 |
|       | 0.6251 | 0.6156 | 0.6038 | 0.5794 | 0.5526 | 0.522  |
|       | 0.735  | 0.7251 | 0.7127 | 0.6867 | 0.6579 | 0.6243 |
|       | 0.1045 | 0.107  | 0.1098 | 0.1152 | 0.1201 | 0.1245 |

This figure was produced as follows:

```

plotcor2br01endp =
  ListPointPlot3D[Table[ddat = datsymfix1[initphm[[i, 1]], initphm[[i, 2]],
    initphm[[i, 3]], 0.2, 10, 0.01, 0.1, 2000][[1000, 4 ;; 6]];
    {{ddat[[1]], ddat[[2]], ddat[[3]] / (Sqrt[ddat[[1]] (1 - ddat[[1]]) ddat[[2]] (1 -
      ddat[[2]])}}}, {i, 1, 6}], PlotStyle -> {Directive[Red, PointSize[0.035]],
    Directive[Darker[Green], PointSize[0.035]], Directive[Magenta, PointSize[0.035]],
    Directive[Orange, PointSize[0.035]], Directive[Green, PointSize[0.035]],
    Directive[Blue, PointSize[0.035]]}, AxesLabel -> {p2, t2, D}];
plotcor2br01all = ListPointPlot3D[Table[Table[ddat = datsymfix1[initphm[[i, 1]],
    initphm[[i, 2]], initphm[[i, 3]], 0.2, 10, 0.01, 0.1, 2000][[n, 4 ;; 6]];
    {ddat[[1]], ddat[[2]], ddat[[3]] / (Sqrt[ddat[[1]] (1 - ddat[[1]])
      ddat[[2]] (1 - ddat[[2]])}}}, {n, 1, 1000}], {i, 1, 6}],
  PlotStyle -> {Red, Darker[Green], Magenta, Orange, Green, Blue}];
plotcor2br01 = Show[plotcor2br01endp, plotcor2br01all, plotcurveequilcor10,
  ImageSize -> 450, PlotRange -> {{0, 1}, {0, 1}, {-0.005, 1.005}},
  AxesLabel -> {Text[Style[p22, Black, 15]],
    Text[Style[t22, Black, 15]], Text[Style[D2, cor, Black, 15]]},
  LabelStyle -> Directive[Black, FontFamily -> "Helvetica", 12], BoxRatios -> {1, 1, 0.6},
  ViewPoint -> {3.4, -2.4, 1.6}, AxesEdge -> {{0, 0}, {1, 0}, {1, 1}},
  Ticks -> {{0, 0.5, 1}, {{0, " 0"}, 0.5, 1}, {0, 0.5, 1}}]

```

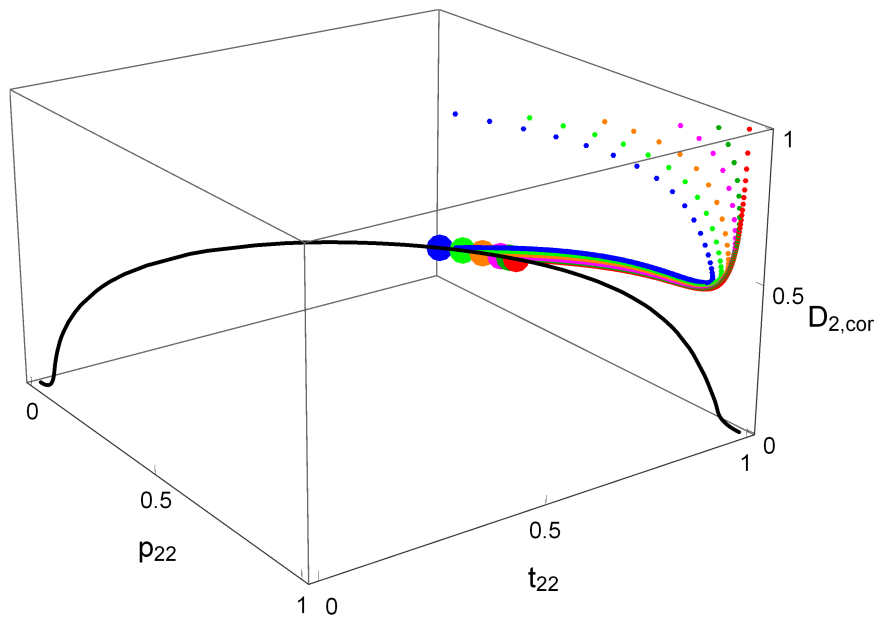

### 3.1.3 Generating Figures 3c, 3d (see main text for details)

```

initvalD0 = {{0.99, 0.99, 0}, {0.95, 0.95, 0},
  {0.9, 0.9, 0}, {0.8, 0.8, 0}, {0.7, 0.7, 0}, {0.6, 0.6, 0}};

```

```

tabdatfixD0[ss_, α_, mm_, r_, tend_] [nvals_] := Table[
  {n, Transpose[Table[datsymfix1[initvalD0[[i, 1]], initvalD0[[i, 2]], initvalD0[[i,
    3]], ss, α, mm, r, tend][[n, 4 ;; 6]] // Chop, {i, 1, 6}]]}, {n, nvals}]

```

Data for specific generations ({1,10,50,100,500,1000,5000,10000,20000,50000}):

Figure 3c

```
Round[10^4 * tabdatfixD0[0.2, 10, 0.01, 0.001, 50000][
  {1, 10, 50, 100, 500, 1000, 5000, 10000, 20000, 50000}]] / 10^4. // TableForm
```

|        |        |        |        |        |        |        |
|--------|--------|--------|--------|--------|--------|--------|
| 1.     | 0.99   | 0.95   | 0.9    | 0.8    | 0.7    | 0.6    |
|        | 0.99   | 0.95   | 0.9    | 0.8    | 0.7    | 0.6    |
|        | 0.     | 0.     | 0.     | 0.     | 0.     | 0.     |
| 10.    | 0.9775 | 0.9278 | 0.8635 | 0.7491 | 0.6489 | 0.5536 |
|        | 0.9873 | 0.9749 | 0.9452 | 0.8547 | 0.7528 | 0.6475 |
|        | 0.0123 | 0.0216 | 0.0345 | 0.0438 | 0.039  | 0.0308 |
| 50.    | 0.9769 | 0.9241 | 0.8255 | 0.591  | 0.4797 | 0.4019 |
|        | 0.9871 | 0.9732 | 0.9173 | 0.7061 | 0.5818 | 0.4856 |
|        | 0.0125 | 0.0247 | 0.0676 | 0.1474 | 0.1291 | 0.098  |
| 100.   | 0.9764 | 0.9232 | 0.8213 | 0.5138 | 0.379  | 0.3113 |
|        | 0.987  | 0.9729 | 0.9138 | 0.623  | 0.4655 | 0.3758 |
|        | 0.0126 | 0.0249 | 0.0702 | 0.177  | 0.1498 | 0.1103 |
| 500.   | 0.9721 | 0.9155 | 0.7929 | 0.4247 | 0.2928 | 0.2502 |
|        | 0.9862 | 0.97   | 0.8914 | 0.5217 | 0.3554 | 0.2943 |
|        | 0.0133 | 0.0273 | 0.0849 | 0.1844 | 0.1391 | 0.1032 |
| 1000.  | 0.9665 | 0.9049 | 0.7483 | 0.3526 | 0.2704 | 0.2473 |
|        | 0.9851 | 0.9655 | 0.8534 | 0.4351 | 0.3251 | 0.2902 |
|        | 0.0142 | 0.0308 | 0.1073 | 0.1733 | 0.1279 | 0.1011 |
| 5000.  | 0.9086 | 0.6953 | 0.28   | 0.1162 | 0.2063 | 0.2379 |
|        | 0.9674 | 0.8046 | 0.3401 | 0.1004 | 0.2333 | 0.2765 |
|        | 0.028  | 0.1259 | 0.1419 | 0.0406 | 0.0848 | 0.0939 |
| 10000. | 0.7237 | 0.3679 | 0.1612 | 0.1071 | 0.1975 | 0.2362 |
|        | 0.831  | 0.4479 | 0.168  | 0.085  | 0.22   | 0.2741 |
|        | 0.1025 | 0.1443 | 0.0629 | 0.0307 | 0.0773 | 0.0925 |
| 20000. | 0.5545 | 0.3089 | 0.1548 | 0.1068 | 0.1966 | 0.236  |
|        | 0.66   | 0.3708 | 0.1577 | 0.0844 | 0.2186 | 0.2738 |
|        | 0.1212 | 0.1145 | 0.0566 | 0.0304 | 0.0765 | 0.0923 |
| 50000. | 0.5506 | 0.308  | 0.1548 | 0.1068 | 0.1966 | 0.236  |
|        | 0.6557 | 0.3695 | 0.1577 | 0.0844 | 0.2186 | 0.2738 |
|        | 0.1204 | 0.1139 | 0.0566 | 0.0304 | 0.0765 | 0.0923 |

Computing divergence between subpopulations (p22 - p12, t22 - t12):

```
divergefixD0[ss_, αα_, mm_, r_, tend_][nvals_] :=
  Table[{n, Transpose[Table[{datsymfix1[initvalD0[[i, 1]], initvalD0[[i, 2]],
    initvalD0[[i, 3]], ss, αα, mm, r, tend][[n]][[4]] -
    datsymfix1[initvalD0[[i, 1]], initvalD0[[i, 2]], initvalD0[[i, 3]],
    ss, αα, mm, r, tend][[n]][[1]], datsymfix1[initvalD0[[i, 1]],
    initvalD0[[i, 2]], initvalD0[[i, 3]], ss, αα, mm, r, tend][[n]][[5]] -
    datsymfix1[initvalD0[[i, 1]], initvalD0[[i, 2]], initvalD0[[i, 3]],
    ss, αα, mm, r, tend][[n]][[2]]} // Chop, {i, 1, 6}]]], {n, nvals}]
```

```
Round[10^4 * divergefixD0[0.2, 10, 0.01, 0.001, 50000] [
  {1, 10, 50, 100, 500, 1000, 5000, 10000, 20000, 50000}]] / 10^4. // TableForm
```

|        |        |        |        |        |        |        |
|--------|--------|--------|--------|--------|--------|--------|
| 1.     | 0.99   | 0.95   | 0.9    | 0.8    | 0.7    | 0.6    |
|        | 0.99   | 0.95   | 0.9    | 0.8    | 0.7    | 0.6    |
| 10.    | 0.9666 | 0.9163 | 0.8507 | 0.7324 | 0.6291 | 0.5319 |
|        | 0.9767 | 0.9643 | 0.9348 | 0.8449 | 0.7439 | 0.6397 |
| 50.    | 0.9656 | 0.9122 | 0.8113 | 0.5591 | 0.425  | 0.3314 |
|        | 0.9764 | 0.9625 | 0.9069 | 0.6957 | 0.5697 | 0.4725 |
| 100.   | 0.9646 | 0.9108 | 0.8066 | 0.4765 | 0.3068 | 0.2134 |
|        | 0.9762 | 0.9621 | 0.9034 | 0.6131 | 0.4522 | 0.3579 |
| 500.   | 0.9565 | 0.8995 | 0.7745 | 0.3807 | 0.2088 | 0.1357 |
|        | 0.9748 | 0.9587 | 0.8807 | 0.5125 | 0.3422 | 0.2727 |
| 1000.  | 0.946  | 0.8842 | 0.7249 | 0.3025 | 0.1826 | 0.1318 |
|        | 0.9728 | 0.9535 | 0.8424 | 0.4265 | 0.3119 | 0.2682 |
| 5000.  | 0.8408 | 0.6315 | 0.21   | 0.0439 | 0.1041 | 0.119  |
|        | 0.944  | 0.7858 | 0.3304 | 0.0971 | 0.2193 | 0.2535 |
| 10000. | 0.552  | 0.2426 | 0.0722 | 0.0324 | 0.0926 | 0.1166 |
|        | 0.7539 | 0.4146 | 0.1601 | 0.082  | 0.2056 | 0.2508 |
| 20000. | 0.2553 | 0.1592 | 0.0639 | 0.032  | 0.0914 | 0.1164 |
|        | 0.4723 | 0.3243 | 0.1499 | 0.0814 | 0.2042 | 0.2505 |
| 50000. | 0.2478 | 0.1578 | 0.0638 | 0.032  | 0.0914 | 0.1163 |
|        | 0.4645 | 0.3228 | 0.1499 | 0.0814 | 0.2042 | 0.2505 |

```

plotcor2cr0001endp =
  ListPointPlot3D[Table[ddat = datsymfix1[initvalD0[[i, 1]], initvalD0[[i, 2]],
    initvalD0[[i, 3]], 0.2, 10, 0.01, 0.001, 50000][[50000, 4 ;; 6]];
    {{ddat[[1]], ddat[[2]], ddat[[3]] / (√(ddat[[1]] (1 - ddat[[1]]) ddat[[2]] (1 -
      ddat[[2]])))}}], {i, 1, 6}], PlotStyle → {Directive[Red, PointSize[0.035]],
    Directive[Darker[Green], PointSize[0.035]], Directive[Magenta, PointSize[0.035]],
    Directive[Orange, PointSize[0.035]], Directive[Green, PointSize[0.035]],
    Directive[Blue, PointSize[0.035]]}, AxesLabel → {p2, t2, D}];
plotcor2cr0001all = ListPointPlot3D[Table[Table[ddat = datsymfix1[initvalD0[[i, 1]],
    initvalD0[[i, 2]], initvalD0[[i, 3]], 0.2, 10, 0.01, 0.001, 50000][[n, 4 ;; 6]];
    {ddat[[1]], ddat[[2]], ddat[[3]] /
      (√(ddat[[1]] (1 - ddat[[1]]) ddat[[2]] (1 - ddat[[2]])))},
    {n, Flatten[{Join[Table[j, {j, 1, 1000}], Table[1000 + 10 j, {j, 1, 4000}]]}],
    {i, 1, 6}], PlotStyle → {Red, Darker[Green], Magenta, Orange, Green, Blue}];
plotcor2cr0001 = Show[plotcor2cr0001all, plotcor2cr0001endp, plotcurveequilcor10,
  ImageSize → 450, PlotRange → {{0, 1}, {0, 1}, {-0.005, 1.005}},
  AxesLabel → {Text[Style[p22, Black, 15]],
    Text[Style[t22, Black, 15]], Text[Style[D2,cor, Black, 15]]},
  LabelStyle → Directive[Black, FontFamily → "Helvetica", 12], BoxRatios → {1, 1, 0.6},
  ViewPoint → {3.4, -2.4, 1.6}, AxesEdge → {{0, 0}, {1, 0}, {1, 1}},
  Ticks → {{0, 0.5, 1}, {{0, " 0"}, 0.5, 1}, {0, 0.5, 1}}]

```

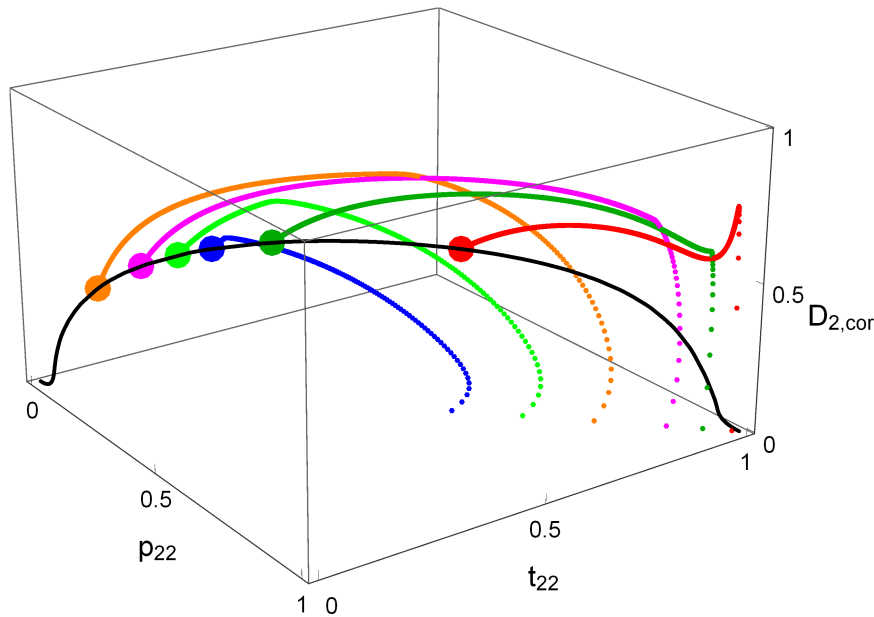

Figure 3d

```
Round[10^4 * tabdatfixD0[0.2, 10, 0.01, 0.1, 5000][{1, 10, 50, 100, 500, 1000, 5000}]] /
10^4. // TableForm
```

|       |        |        |        |        |        |        |
|-------|--------|--------|--------|--------|--------|--------|
| 1.    | 0.99   | 0.95   | 0.9    | 0.8    | 0.7    | 0.6    |
|       | 0.99   | 0.95   | 0.9    | 0.8    | 0.7    | 0.6    |
|       | 0.     | 0.     | 0.     | 0.     | 0.     | 0.     |
| 10.   | 0.9726 | 0.9255 | 0.867  | 0.7586 | 0.6591 | 0.5631 |
|       | 0.9867 | 0.9745 | 0.9469 | 0.8622 | 0.7645 | 0.6616 |
|       | 0.0111 | 0.0192 | 0.0325 | 0.0561 | 0.0702 | 0.0767 |
| 50.   | 0.9305 | 0.859  | 0.7527 | 0.6053 | 0.5134 | 0.4346 |
|       | 0.9765 | 0.9437 | 0.8624 | 0.7196 | 0.6209 | 0.5311 |
|       | 0.018  | 0.0389 | 0.08   | 0.1244 | 0.1368 | 0.1371 |
| 100.  | 0.8573 | 0.7337 | 0.6043 | 0.4762 | 0.4043 | 0.3425 |
|       | 0.9428 | 0.844  | 0.7167 | 0.5774 | 0.4935 | 0.4178 |
|       | 0.0375 | 0.0845 | 0.1223 | 0.1378 | 0.1353 | 0.1264 |
| 500.  | 0.5969 | 0.4917 | 0.4089 | 0.3347 | 0.2936 | 0.2539 |
|       | 0.7054 | 0.5905 | 0.4945 | 0.4036 | 0.3508 | 0.2981 |
|       | 0.1115 | 0.1275 | 0.1284 | 0.1195 | 0.1103 | 0.0986 |
| 1000. | 0.5962 | 0.4912 | 0.4085 | 0.3345 | 0.2934 | 0.2537 |
|       | 0.7046 | 0.5899 | 0.494  | 0.4033 | 0.3506 | 0.2979 |
|       | 0.1116 | 0.1275 | 0.1284 | 0.1194 | 0.1103 | 0.0985 |
| 5000. | 0.5962 | 0.4912 | 0.4085 | 0.3345 | 0.2934 | 0.2537 |
|       | 0.7046 | 0.5899 | 0.494  | 0.4033 | 0.3506 | 0.2979 |
|       | 0.1116 | 0.1275 | 0.1284 | 0.1194 | 0.1103 | 0.0985 |

Divergence:

```
Round[10^4 * divergefixD0[0.2, 10, 0.01, 0.1, 5000][{1, 10, 50, 100, 500, 1000, 5000}]] /
10^4. // TableForm
```

|       |        |        |        |        |        |        |
|-------|--------|--------|--------|--------|--------|--------|
| 1.    | 0.99   | 0.95   | 0.9    | 0.8    | 0.7    | 0.6    |
|       | 0.99   | 0.95   | 0.9    | 0.8    | 0.7    | 0.6    |
|       |        |        |        |        |        |        |
| 10.   | 0.9568 | 0.9095 | 0.8501 | 0.7394 | 0.6383 | 0.5416 |
|       | 0.9755 | 0.9634 | 0.936  | 0.8521 | 0.7554 | 0.6538 |
|       |        |        |        |        |        |        |
| 50.   | 0.8771 | 0.8076 | 0.7018 | 0.5498 | 0.4535 | 0.3731 |
|       | 0.9576 | 0.926  | 0.8461 | 0.7049 | 0.6071 | 0.5188 |
|       |        |        |        |        |        |        |
| 100.  | 0.7436 | 0.6312 | 0.5079 | 0.3812 | 0.3099 | 0.2516 |
|       | 0.9023 | 0.8111 | 0.6896 | 0.5546 | 0.4733 | 0.4009 |
|       |        |        |        |        |        |        |
| 500.  | 0.2551 | 0.235  | 0.2059 | 0.1719 | 0.1501 | 0.1273 |
|       | 0.4746 | 0.4449 | 0.4004 | 0.3461 | 0.3097 | 0.27   |
|       |        |        |        |        |        |        |
| 1000. | 0.2537 | 0.234  | 0.2053 | 0.1715 | 0.1498 | 0.1271 |
|       | 0.4732 | 0.4439 | 0.3997 | 0.3456 | 0.3093 | 0.2698 |
|       |        |        |        |        |        |        |
| 5000. | 0.2537 | 0.234  | 0.2053 | 0.1715 | 0.1498 | 0.1271 |
|       | 0.4732 | 0.4439 | 0.3997 | 0.3456 | 0.3093 | 0.2698 |

Note that the divergence here, both for p and t, is higher than for the smaller recombination rate in Figure 3c!

```

plotcor2dr01endp =
  ListPointPlot3D[Table[ddat = datsymfix1[initvalD0[[i, 1]], initvalD0[[i, 2]],
    initvalD0[[i, 3]], 0.2, 10, 0.01, 0.1, 5000][[5000, 4 ;; 6]];
    {{ddat[[1]], ddat[[2]], ddat[[3]] / (Sqrt[ddat[[1]] (1 - ddat[[1]]) ddat[[2]] (1 -
      ddat[[2]])}}], {i, 1, 6}], PlotStyle -> {Directive[Red, PointSize[0.035]],
    Directive[Darker[Green], PointSize[0.035]], Directive[Magenta, PointSize[0.035]],
    Directive[Orange, PointSize[0.035]], Directive[Green, PointSize[0.035]],
    Directive[Blue, PointSize[0.035]]}, AxesLabel -> {p2, t2, D}];
plotcor2dr01all = ListPointPlot3D[Table[Table[ddat = datsymfix1[initvalD0[[i, 1]],
    initvalD0[[i, 2]], initvalD0[[i, 3]], 0.2, 10, 0.01, 0.1, 5000][[n, 4 ;; 6]];
    {ddat[[1]], ddat[[2]], ddat[[3]] /
      (Sqrt[ddat[[1]] (1 - ddat[[1]]) ddat[[2]] (1 - ddat[[2]])}}],
    {n, Flatten[{Join[Table[j, {j, 1, 1000}], Table[1000 + 10 j, {j, 1, 400}]]}],
    {i, 1, 6}], PlotStyle -> {Red, Darker[Green], Magenta, Orange, Green, Blue}];
plotcor2dr01 = Show[plotcor2dr01all, plotcor2dr01endp, plotcurveequilcor10,
  ImageSize -> 450, PlotRange -> {{0, 1}, {0, 1}, {-0.005, 1.005}},
  AxesLabel -> {Text[Style[p22, Black, 15]],
    Text[Style[t22, Black, 15]], Text[Style[D2,cor, Black, 15]]},
  LabelStyle -> Directive[Black, FontFamily -> "Helvetica", 12], BoxRatios -> {1, 1, 0.6},
  ViewPoint -> {3.4, -2.4, 1.6}, AxesEdge -> {{0, 0}, {1, 0}, {1, 1}},
  Ticks -> {{0, 0.5, 1}, {{0, " 0"}, 0.5, 1}, {0, 0.5, 1}}]

```

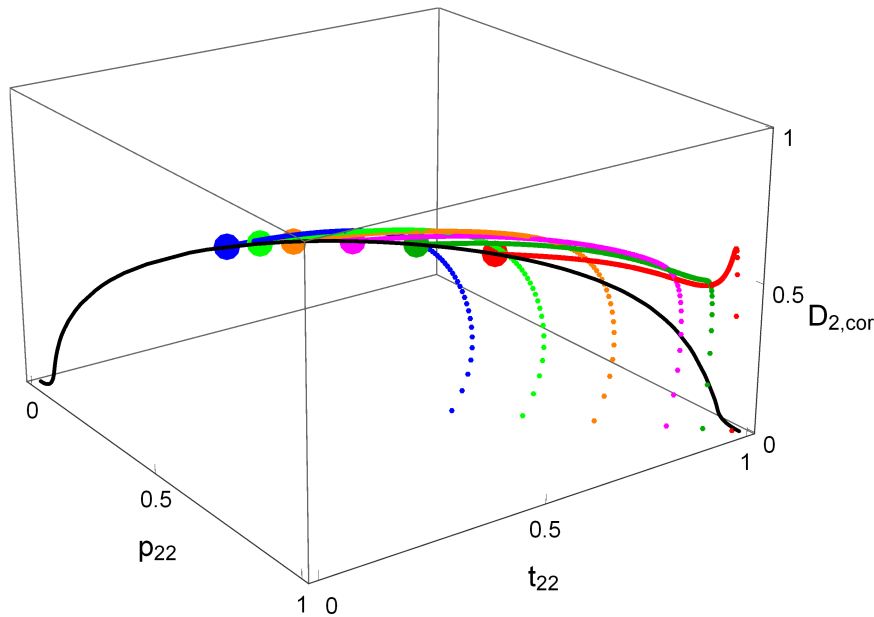

Other 3D figures were produced analogously

## 3.2 Generate initial data with nearly symmetric initial conditions

```

datsysymnear[p20_, t20_, dd0_, s_, α_, m_, r_, tend_] :=
datsysymnear[p20, t20, dd0, s, α, m, r, tend] =
NestList[itgen[s, s, α, α, m, m, r], {(1 - p2) RandomReal[{0.95, 1.05}],
(1 - t2) RandomReal[{0.95, 1.05}], 0.98 * Min[dd * RandomReal[{0.95, 1.05}],
Min[(1 - p2) RandomReal[{0.95, 1.05}] * (1 - (1 - t2) RandomReal[{0.95, 1.05})],
(1 - (1 - p2) RandomReal[{0.95, 1.05})] * (1 - t2) RandomReal[{0.95, 1.05})]}],
p2, t2, dd} /. {p2 → p20, t2 → t20, dd → dd0}, tend]

```

```

tabdatsymnear[ss_, αα_, mm_, r_, tend_] [nvals_] :=
Table[{n, Transpose[Table[datsysymnear[initvals[[i, 1]], initvals[[i, 2]],
initvals[[i, 3]], ss, αα, mm, r, tend][[n]] // Chop, {i, 1, 8}]]], {n, nvals}]

```

The following provides an example for the fact that slight deviations from symmetric initial conditions (in this case by up to 5%) lead to equilibria that are also close to the symmetric equilibrium.

SeedRandom[5]

tabdatsymnear[0.2, 10, 0.01, 0.01, 10000][{1, 10, 100, 1000, 5000, 10000}] // TableForm

|       |           |           |           |           |           |           |           |           |
|-------|-----------|-----------|-----------|-----------|-----------|-----------|-----------|-----------|
| 1     | 0.047504  | 0.104707  | 0.308284  | 0.298176  | 0.0502728 | 0.0957219 | 0.285646  | 0.29402   |
|       | 0.0478251 | 0.0972991 | 0.0502547 | 0.289269  | 0.0511082 | 0.0960357 | 0.0495603 | 0.31073   |
|       | 0         | 0         | 0         | 0         | 0.0382716 | 0.0681139 | 0.0291374 | 0.19716   |
|       | 0.95      | 0.9       | 0.7       | 0.7       | 0.95      | 0.9       | 0.7       | 0.7       |
|       | 0.95      | 0.9       | 0.95      | 0.7       | 0.95      | 0.9       | 0.95      | 0.7       |
|       | 0         | 0         | 0         | 0         | 0.04      | 0.07      | 0.03      | 0.2       |
| 10    | 0.0690184 | 0.139359  | 0.354977  | 0.327689  | 0.0238609 | 0.0382095 | 0.3946    | 0.03955   |
|       | 0.0237022 | 0.0556002 | 0.239333  | 0.225387  | 0.0133083 | 0.0173711 | 0.255147  | 0.03056   |
|       | 0.0192383 | 0.0300719 | 0.0362455 | 0.0210997 | 0.012598  | 0.0157453 | 0.105109  | 0.02746   |
|       | 0.927858  | 0.866856  | 0.654343  | 0.670703  | 0.978517  | 0.959254  | 0.573493  | 0.94597   |
|       | 0.975257  | 0.947898  | 0.770308  | 0.772628  | 0.987152  | 0.981808  | 0.716413  | 0.96188   |
|       | 0.0199225 | 0.0286655 | 0.035643  | 0.0210803 | 0.0121895 | 0.0164315 | 0.114012  | 0.03455   |
| 100   | 0.0852246 | 0.195301  | 0.426903  | 0.419742  | 0.0330694 | 0.0472057 | 0.374527  | 0.0336    |
|       | 0.0296503 | 0.0972022 | 0.321911  | 0.314236  | 0.0147077 | 0.0178431 | 0.264674  | 0.0146    |
|       | 0.0248472 | 0.0652225 | 0.0918839 | 0.0896788 | 0.0137572 | 0.0161617 | 0.0999837 | 0.0135    |
|       | 0.910631  | 0.817269  | 0.583205  | 0.578504  | 0.969535  | 0.950209  | 0.5885    | 0.9574    |
|       | 0.968628  | 0.913016  | 0.689071  | 0.683857  | 0.985836  | 0.981488  | 0.696225  | 0.9832    |
|       | 0.0262359 | 0.0590644 | 0.0903139 | 0.0899407 | 0.0132568 | 0.0167547 | 0.108813  | 0.0155    |
| 1000  | 0.317089  | 0.372389  | 0.379522  | 0.373623  | 0.226052  | 0.256262  | 0.355183  | 0.204557  |
|       | 0.206161  | 0.262297  | 0.269806  | 0.263644  | 0.12265   | 0.148691  | 0.244507  | 0.103139  |
|       | 0.0977929 | 0.106811  | 0.105158  | 0.103616  | 0.0769609 | 0.0844003 | 0.098942  | 0.0643932 |
|       | 0.662475  | 0.648281  | 0.630555  | 0.624618  | 0.791993  | 0.725626  | 0.608514  | 0.728574  |
|       | 0.773332  | 0.759058  | 0.740709  | 0.734521  | 0.893078  | 0.834256  | 0.717651  | 0.836449  |
|       | 0.104753  | 0.100949  | 0.102515  | 0.104077  | 0.0683369 | 0.092177  | 0.108531  | 0.095076  |
| 5000  | 0.362008  | 0.383018  | 0.377593  | 0.371665  | 0.385235  | 0.362092  | 0.354615  | 0.330943  |
|       | 0.251563  | 0.27345   | 0.267775  | 0.261592  | 0.275774  | 0.25165   | 0.24392   | 0.219651  |
|       | 0.101032  | 0.106611  | 0.105224  | 0.103665  | 0.107168  | 0.101056  | 0.0989397 | 0.091804  |
|       | 0.616773  | 0.637788  | 0.632473  | 0.626577  | 0.639939  | 0.616859  | 0.609094  | 0.583438  |
|       | 0.726331  | 0.748226  | 0.742712  | 0.736577  | 0.750453  | 0.726421  | 0.718267  | 0.691077  |
|       | 0.106664  | 0.101089  | 0.102551  | 0.104132  | 0.100487  | 0.106642  | 0.108562  | 0.114345  |
| 10000 | 0.362008  | 0.383018  | 0.377593  | 0.371665  | 0.385235  | 0.362092  | 0.354615  | 0.330943  |
|       | 0.251563  | 0.27345   | 0.267775  | 0.261592  | 0.275775  | 0.25165   | 0.24392   | 0.219651  |
|       | 0.101032  | 0.106611  | 0.105224  | 0.103665  | 0.107168  | 0.101056  | 0.0989397 | 0.091804  |
|       | 0.616773  | 0.637788  | 0.632473  | 0.626577  | 0.639939  | 0.616859  | 0.609094  | 0.583438  |
|       | 0.726331  | 0.748226  | 0.742712  | 0.736577  | 0.750453  | 0.726421  | 0.718267  | 0.691077  |
|       | 0.106664  | 0.101089  | 0.102551  | 0.104132  | 0.100487  | 0.106642  | 0.108562  | 0.114345  |
