# Supplementary material for: The Effects on Parapatric Divergence of Linkage between Preference and Trait Loci versus Pleiotropy
Source: MDPI journal article supplement (doi:10.3390/genes9040217), 2018-04-17
Supplement: s1 [file s1]

(a)  $r = 0.001$ , maximum initial LD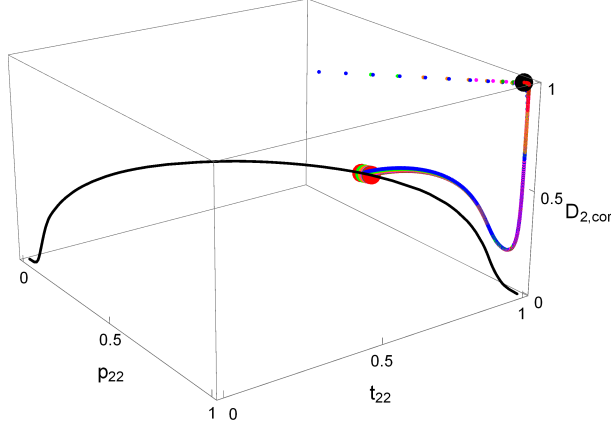(b)  $r = 0.1$ , maximum initial LD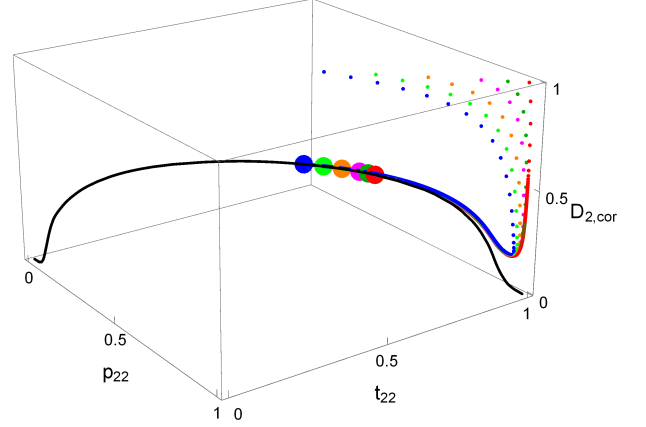(c)  $r = 0.001$ , no initial LD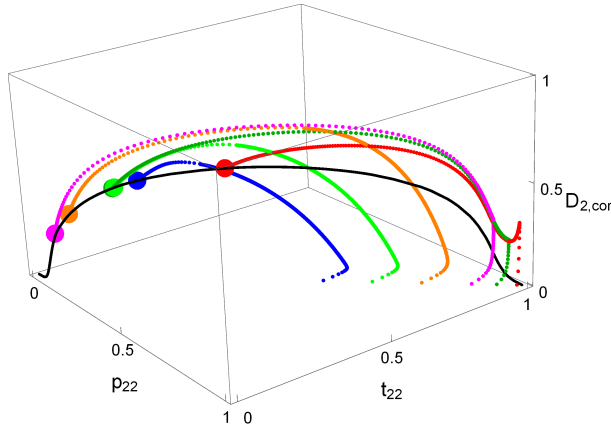(d)  $r = 0.1$ , no initial LD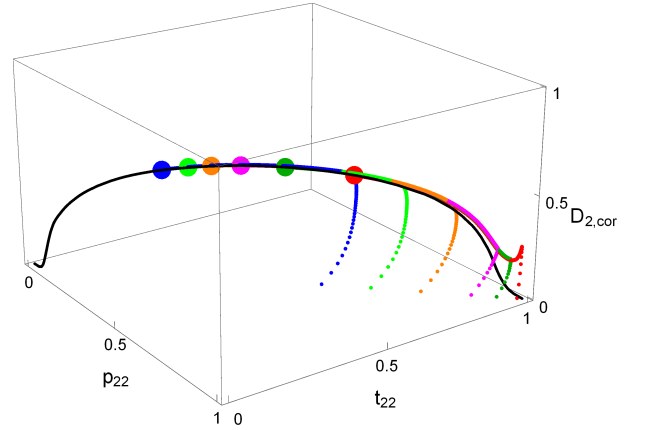(e)  $r = 0.001$ , moderate initial LD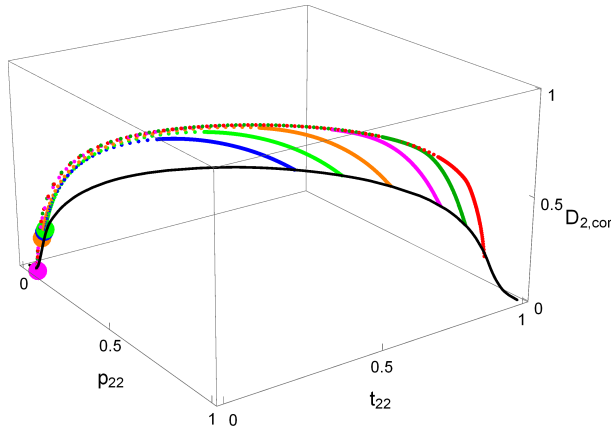(f)  $r = 0.1$ , moderate initial LD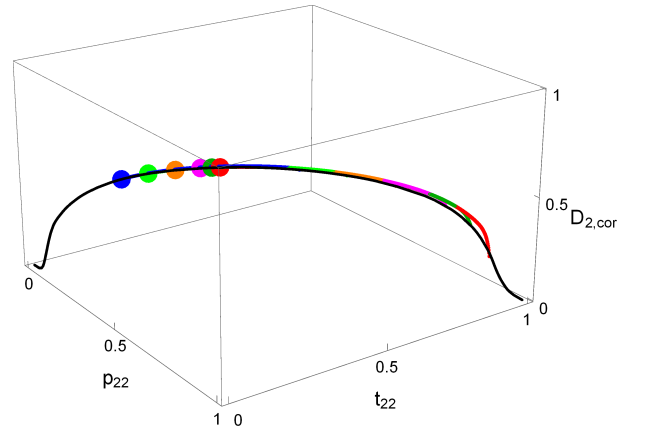

**Figure S4.** The effects of initial conditions and recombination rates on evolutionary trajectories when the trait is expressed in both sexes and migration is symmetric and very small,  $m = 0.001$ . Otherwise, this figure is analogous to Figure 3 (in which  $m = 0.01$ ). The graphs in this figure look similar to those in Figure 3. However, often less divergence is maintained at equilibrium compared to  $m = 0.01$ . Most notably, the time course is about 3–10 times long than with  $m = 0.01$ . Especially, the trajectories that start with high divergence (red, dark green) hang around very high values of  $p_{2,2} > 0.9$  and  $t_{2,2} > 0.9$  for very long; typically 1000 generations for the higher recombination rate; and 20,000–50,000 for  $r = 0.001$ . During this time, only linkage disequilibrium changes (very slowly), and allele frequencies remain almost constant.
