# Supplementary material for: The Effects on Parapatric Divergence of Linkage between Preference and Trait Loci versus Pleiotropy
Source: MDPI journal article supplement (doi:10.3390/genes9040217), 2018-04-17
Supplement: s1 [file s1]

(a)  $m_1 = m_2 = 0.01$ , high initial LD, selection on both sexes

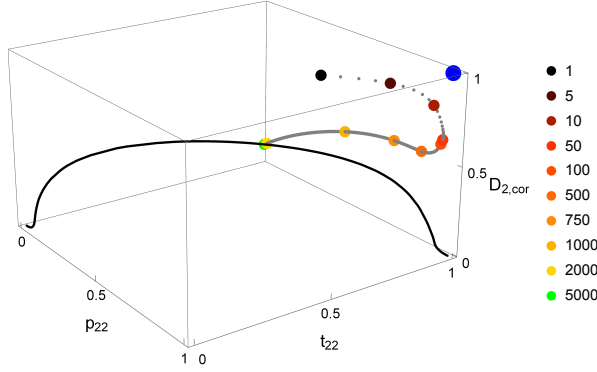

(b)  $m_1 = m_2 = 0.01$ , no initial LD, selection on both sexes

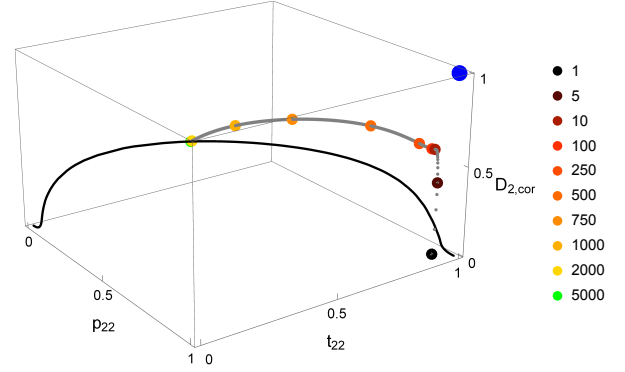

(c)  $m_1 = m_2 = 0.001$ , high initial LD, selection on both sexes

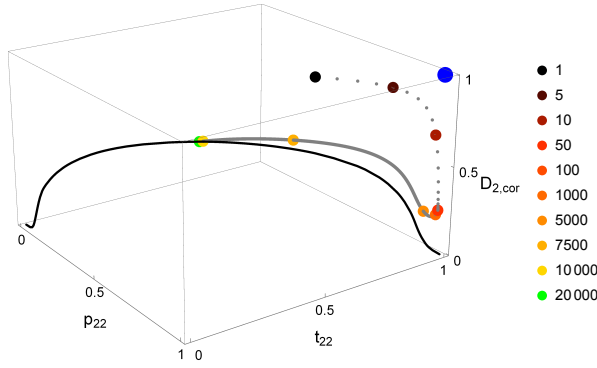

(d)  $m_1 = m_2 = 0.001$ , no initial LD, selection on both sexes

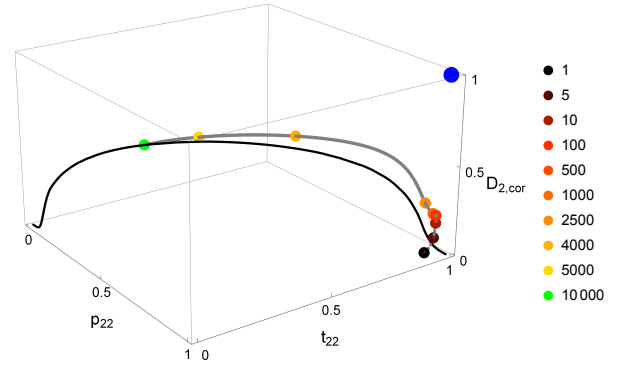

(e)  $m_1 = m_2 = 0.01$ , high initial LD, selection only on males

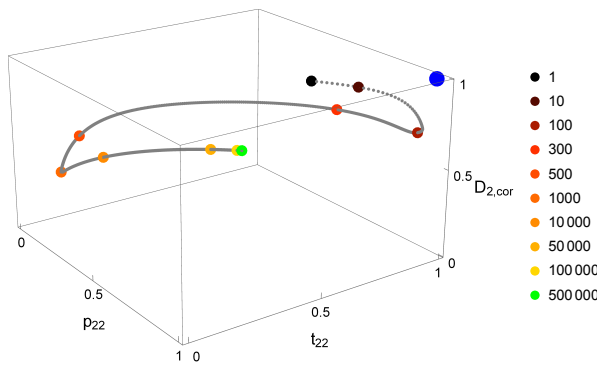

(f)  $m_1 = m_2 = 0.01$ , no initial LD, selection only on males

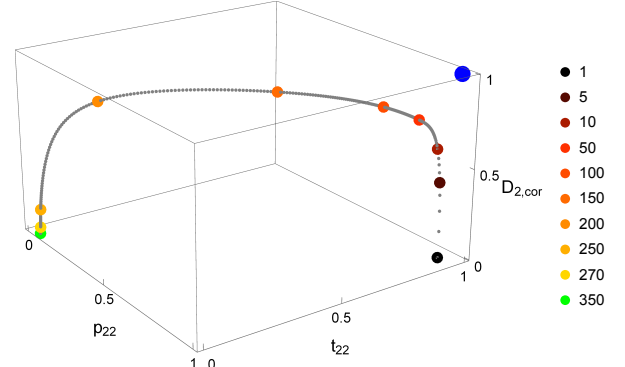

**Figure S1.** Detailed temporal evolution for selected initial conditions. Colored symbols show  $(p_{2,2}, t_{2,2}, D_{2,cor})$  at the generation given in the legend. Gray dots show the complete trajectories. Linkage between trait and preference locus is tight ( $r = 0.01$ ). The big blue symbol shows the stable polymorphic equilibrium under phenotype matching. Black curves show all stable equilibria for  $r > 0$  when both sexes express the trait. Top row (a, b): both sexes express the trait and migration is symmetric ( $m_1 = m_2 = 0.01$ ). Middle row (c, d): both sexes express the trait and migration is symmetric and very weak ( $m_1 = m_2 = 0.001$ ). Bottom row (e, f): only males express the trait and migration is symmetric ( $m_1 = m_2 = 0.01$ ). In all panels, population 1 is initially fixed for  $P_1$  and  $T_1$ . Left and right columns differ by the initial conditions in population 2. Left column:  $p_{2,2}(0) = t_{2,2}(0) = 0.7$ ,  $D_2(0) = 0.2$  ( $D_{2,cor}(0) = 0.952$ ); right column:  $p_{2,2}(0) = t_{2,2}(0) = 0.95$ ,  $D_2(0) = 0$ . The other parameters are  $s_1 = s_2 = 0.2$  and  $\alpha_1 = \alpha_2 = 10$ .
