# Supplementary material for: The Effects on Parapatric Divergence of Linkage between Preference and Trait Loci versus Pleiotropy
Source: MDPI journal article supplement (doi:10.3390/genes9040217), 2018-04-17
Supplement: s1 [file s1]

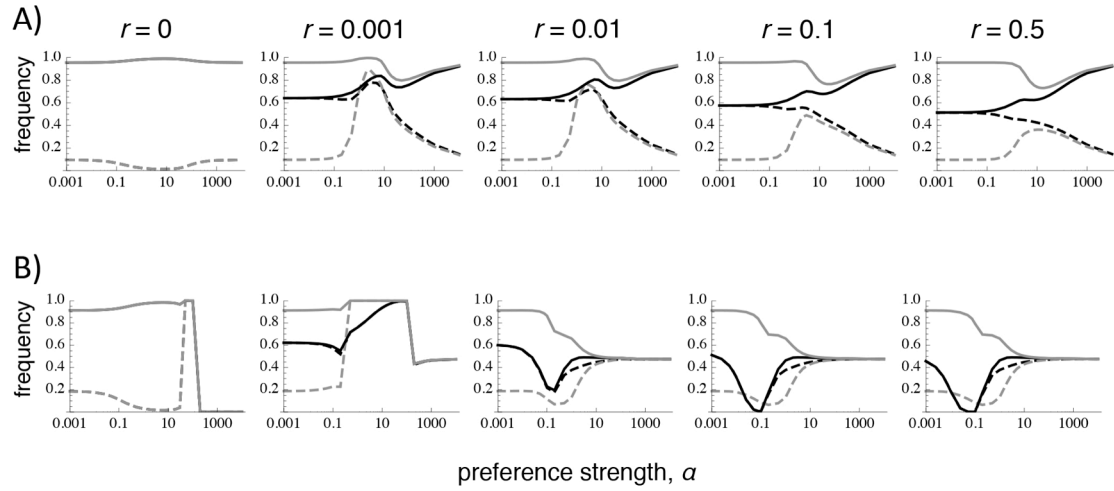

Figure S12. Preference and trait divergence at 1 million generations after secondary contact when viability selection strengths are asymmetric, such that  $s_1 = 0.1$  and  $s_2 = 0.2$ . Other parameter values and legend follow Figure 1. a) viability selection occurs in both sexes, and b) viability selection occurs only in males.
